# Supplementary material for: EVC-EVC2 complex stability and ciliary targeting are regulated by modification with ubiquitin and SUMO
Source: Front Cell Dev Biol. 2023 Jul 27;11:1190258. doi: 10.3389/fcell.2023.1190258 (PMC10413113; doi:10.3389/fcell.2023.1190258)
Supplement: Supplementary file 7 [file Table1.XLSX]

## Sheet: EVC interactome list
Protein_Acc	Description	Fold Change WT/KO
		Exp1	Exp2	Exp3	Mean
P57680 & F6Z2D6	Ellis-van Creveld syndrome protein homolog OS=Mus musculus GN=Evc PE=1 SV=2	65	21	25	37
Q8K1G2	Limbin OS=Mus musculus GN=Evc2 PE=1 SV=1	61	19	29	36.3333
Q6PCQ0 & F6R782	IQ domain-containing protein E OS=Mus musculus GN=Iqce PE=1 SV=1	38	6	9	17.7
D3YUW7	Cingulin OS=Mus musculus GN=Cgn PE=1 SV=1	10	13	12.5	11.8333
Q8VDY4 & F6XAI7	EF-hand calcium-binding domain-containing protein 7 OS=Mus musculus GN=Efcab7 PE=2 SV=1	16	4	6	8.7
Q61468	Mesothelin OS=Mus musculus GN=Msln PE=1 SV=1	6	10	9	8.33333
Q80YF6	Uroplakin-3b OS=Mus musculus GN=Upk3b PE=1 SV=1	6	10	6	7.33333
P58022	Lysyl oxidase homolog 2 OS=Mus musculus GN=Loxl2 PE=1 SV=2	3	8	7	6
Q6A4J8	Ubiquitin carboxyl-terminal hydrolase 7 OS=Mus musculus GN=Usp7 PE=1 SV=1	4	5	5	4.66667
G5E8S8	MAGUK p55 subfamily member 7 OS=Mus musculus GN=Mpp7 PE=1 SV=1	4	3.5	6	4.5
J3QM81	Ankyrin repeat and zinc finger domain-containing protein 1 OS=Mus musculus GN=Ankzf1 PE=1 SV=1	3	6	3	4
Q8R3H7	Heparan sulfate 2-O-sulfotransferase 1 OS=Mus musculus GN=Hs2st1 PE=1 SV=2	3	5	4	4
Q9Z2C6	Uroplakin-1b OS=Mus musculus GN=Upk1b PE=2 SV=3	3	5	3	3.66667
P05132	cAMP-dependent protein kinase catalytic subunit alpha OS=Mus musculus GN=Prkaca PE=1 SV=3	3	4	4	3.66667

## Sheet: Raw Data
Protein_Acc	Description	Experiment 1: WT				Experiment 1: EVC-KO				Experiment 2: WT				Experiment 2: EVC-KO				Experiment 3: WT				Experiment 3: EVC-KO				PSM Ratios WT/KO
		Score	#Pept	PSM	Coverage	Score	#Pept	PSM	Coverage	Score	#Pept	PSM	Coverage	Score	#Pept	PSM	Coverage	Score	#Pept	PSM	Coverage	Score	#Pept	PSM	Coverage	Exp1	Exp2	Exp3	Mean	Other IDs
Q8K1G2	Limbin OS=Mus musculus GN=Evc2 PE=1 SV=1	2540.54	38	60	42					500.76	9	18	16.8					1045.65	21	28	29.2					61	19	29	36.3333
P57680	Ellis-van Creveld syndrome protein homolog OS=Mus musculus GN=Evc PE=1 SV=2	2643.17	41	60	50.6					784.82	15	20	25.7					869.01	15	24	29.8					61	21	25	35.6667	F6Z2D6
Q3UH59	Myosin-10 OS=Mus musculus GN=Myh10 PE=1 SV=1	8729.59	126	187	58.9	8375.4	127	178	54.3	814.91	14	23	14.7					2515.19	48	68	37.1					1.05028	24	69	31.3501	Q5SV64 & Q61879
Q9JMH9	Unconventional myosin-XVIIIa OS=Mus musculus GN=Myo18a PE=1 SV=2	3936.94	58	84	41													2661.06	44	61	35	2115.45	40	52	32.1	85	1	1.16981	29.0566
G3X956	FACT complex subunit SPT16 OS=Mus musculus GN=Supt16 PE=1 SV=1	1501.78	24	41	33.2					819.07	16	21	19.8					849.34	16	18	22.2					42	22	19	27.6667	Q920B9
E9Q580	Unconventional myosin-Ib OS=Mus musculus GN=Myo1b PE=1 SV=1	1777.24	30	43	36.9													1453.31	27	36	35.7					44	1	37	27.3333	P46735 & Q7TQD7
D3Z6I7	Protein Cald1 OS=Mus musculus GN=Cald1 PE=1 SV=1	4555.79	62	75	48																					76	1	1	26
A3KGU5	Spectrin alpha chain, non-erythrocytic 1 OS=Mus musculus GN=Sptan1 PE=1 SV=1	2751.57	47	68	33.7													4453.9	79	97	45.1	2035.65	37	56	27.3	69	1	1.7193	23.9064
Q7TPR4	Alpha-actinin-1 OS=Mus musculus GN=Actn1 PE=1 SV=1	2926.79	44	65	57.7					2868.21	47	61	60.9	3994.04	62	71	68.9	4102.68	62	75	68.5	3877.91	60	68	63.8	66	0.861111	1.10145	22.6542
P68134	Actin, alpha skeletal muscle OS=Mus musculus GN=Acta1 PE=1 SV=1	2590.09	37	57	75.3																	4563.17	73	90	77.7	58	1	0.010989	19.6703
D3Z4N0	Pleckstrin homology-like domain family B member 1 OS=Mus musculus GN=Phldb1 PE=1 SV=1									2613.79	41	50	41.9													1	51	1	17.6667
E9Q5F4	Actin, cytoplasmic 1 (Fragment) OS=Mus musculus GN=Actb PE=1 SV=1	3025.04	37	47	81.9	2644.93	35	41	83.4	2825.36	42	49	79.2													1.14286	50	1	17.381
Q7TQH0	Ataxin-2-like protein OS=Mus musculus GN=Atxn2l PE=1 SV=1	767.77	13	20	22.8	406.65	7	15	18.4	1271.19	20	24	30.9					1056.55	20	23	25.2					1.3125	25	24	16.7708	Q3TGG2
Q9Z0N2	Eukaryotic translation initiation factor 2 subunit 3, Y-linked OS=Mus musculus GN=Eif2s3y PE=1 SV=2	500.56	7	17	39.8					694.43	12	15	31.6					551.46	9	14	33.5					18	16	15	16.3333	Q3TML6
A0A087WS18	CLIP-associating protein 1 OS=Mus musculus GN=Clasp1 PE=1 SV=1									2729.94	45	56	43	1738.13	31	44	36.6	1741.15	31	42	38.4					1	1.26667	43	15.0889
E9Q3W4	Plectin OS=Mus musculus GN=Plec PE=1 SV=1	1002.1	20	42	12.7																	151.38	4	6	4.1	43	1	0.142857	14.7143
S4R2J9	Protein PRRC2C OS=Mus musculus GN=Prrc2c PE=1 SV=1	1283.3	21	41	17.8																					42	1	1	14.6667
F8WGM8	Actin, cytoplasmic 2 (Fragment) OS=Mus musculus GN=Actg1 PE=1 SV=1	2356.76	30	40	98.1									2843.9	40	50	100	2388.3	36	48	92.4	2874.8	41	47	92.4	41	0.0196078	1.02083	14.0135
E9QMQ3	TRIO and F-actin-binding protein OS=Mus musculus GN=Triobp PE=1 SV=1																	1533.08	28	39	65.7					1	1	40	14
Q9WVR4	Fragile X mental retardation syndrome-related protein 2 OS=Mus musculus GN=Fxr2 PE=1 SV=1					893.16	13	22	35.7	1044.47	14	18	42.2					1230.97	18	20	39.4					0.0434783	19	21	13.3478	Q6P5B5
E9Q8Z5	Catenin delta-1 OS=Mus musculus GN=Ctnnd1 PE=1 SV=1	694.35	11	20	25.7	823.43	13	21	31.2	1661.66	28	31	39.8	1258.26	21	26	32.7	1611.26	28	36	43.2					0.954545	1.18519	37	13.0466
E9Q3X0	Major vault protein OS=Mus musculus GN=Mvp PE=1 SV=1					2364.94	38	48	50	626.09	15	22	32.4	1064.4	22	28	42.9	1586.88	32	37	45.5					0.0204082	0.793103	38	12.9378
H3BKH9	Rho guanine nucleotide exchange factor 2 OS=Mus musculus GN=Arhgef2 PE=1 SV=1	784.64	14	24	29	705.05	12	23	33									1272.09	25	34	40.1					1.04167	1	35	12.3472
Q6PCQ0	IQ domain-containing protein E OS=Mus musculus GN=Iqce PE=1 SV=1	798.05	13	21	24.2					115.78	2	5	8.9					303.68	5	8	15.2					22	6	9	12.3333	F6R782
Q9D6F9	Tubulin beta-4A chain OS=Mus musculus GN=Tubb4a PE=1 SV=3	1744.21	26	34	55.6					2218.68	33	40	62.2	2210.7	34	37	62.2	2056.51	31	36	64.2	2577.41	40	45	64.4	35	1.07895	0.804348	12.2944
Q8BMA6	Signal recognition particle subunit SRP68 OS=Mus musculus GN=Srp68 PE=1 SV=2	458.5	7	17	31.2					609.18	12	16	29.3					636.91	13	16	29.6	343.95	7	11	22.2	18	17	1.41667	12.1389	A2AAN2
E9PWB1	Pleckstrin homology-like domain family B member 1 OS=Mus musculus GN=Phldb1 PE=1 SV=1	1484.8	22	33	32.3																					34	1	1	12
Q564F4	T-complex protein 1 subunit delta OS=Mus musculus GN=Cct4 PE=1 SV=1									701.33	15	16	35.6					615.35	13	17	35.6					1	17	18	12	G5E839
E9QM77	Ataxin-2 OS=Mus musculus GN=Atxn2 PE=1 SV=1	502.74	9	15	18.7					731.72	13	16	18.1	309.77	6	9	9.4	694.32	12	17	16.3					16	1.7	18	11.9	G5E839 & F6U2C2 & F7B6X4
D3YUW7	Cingulin OS=Mus musculus GN=Cgn PE=1 SV=1	233.49	5	9	14.4					585.8	11	12	18					838.27	16	24	26.1	35.47	1	1	5.8	10	13	12.5	11.8333
A0A0J9YUQ8	Gelsolin (Fragment) OS=Mus musculus GN=Gsn PE=1 SV=1	1585.35	23	33	48.6									2359.49	35	44	57.9									34	0.0222222	1	11.6741
G3UZ07	Actin, cytoplasmic 2 (Fragment) OS=Mus musculus GN=Actg1 PE=1 SV=1	2019.12	27	32	59																					33	1	1	11.6667
H3BJ40	Rho guanine nucleotide exchange factor 2 OS=Mus musculus GN=Arhgef2 PE=1 SV=1									1557.23	26	32	37.6									1034.46	21	29	35.8	1	33	0.0333333	11.3444
A3KFU8	Polyadenylate-binding protein OS=Mus musculus GN=Pabpc4 PE=1 SV=1									1615.37	26	31	38.8													1	32	1	11.3333
F6QLP8	Protein Cald1 (Fragment) OS=Mus musculus GN=Cald1 PE=1 SV=1	1662.94	24	31	36.5					486.63	8	10	32.5	1718.46	27	31	37.6	1214.76	17	20	31.4	1673.42	25	27	37.6	32	0.34375	0.75	11.0312
Q60760	Growth factor receptor-bound protein 10 OS=Mus musculus GN=Grb10 PE=1 SV=2	497.96	8	14	28.5					680.43	13	18	31.4	86.38	2	7	18	509.5	9	14	26.9					15	2.375	15	10.7917	Q5SUW3
Q6AXB7	Fragile X mental retardation protein 1 homolog OS=Mus musculus GN=Fmr1 PE=1 SV=1									1486.07	22	29	48.2													1	30	1	10.6667
Q3UMG5	Leucine-rich repeat and calponin homology domain-containing protein 2 OS=Mus musculus GN=Lrch2 PE=2 SV=2									274.36	7	14	22.3					559.77	10	15	21.7					1	15	16	10.6667	F7AAC3 & F6VQ19
E9Q555	E3 ubiquitin-protein ligase RNF213 OS=Mus musculus GN=Rnf213 PE=1 SV=1	751.06	15	29	7.9																					30	1	1	10.6667
F8VPL5	Mitogen-activated protein kinase kinase kinase kinase 4 OS=Mus musculus GN=Map4k4 PE=1 SV=2	263.29	6	11	15					514.35	9	17	17									352.3	6	13	13.6	12	18	0.0714286	10.0238	A0A0A6YWM8 & A0A0A6YW53 & A0A0A6YXE5 & P97820 & B2RUE8
Q05793	Basement membrane-specific heparan sulfate proteoglycan core protein OS=Mus musculus GN=Hspg2 PE=1 SV=1	967.52	17	26	9.6																					27	1	1	9.66667
P46735	Unconventional myosin-Ib OS=Mus musculus GN=Myo1b PE=1 SV=3									991.3	19	26	27.9					1513.5	28	36	35.5	1797.32	33	43	41.4	1	27	0.840909	9.61364
Q8BKX1	Brain-specific angiogenesis inhibitor 1-associated protein 2 OS=Mus musculus GN=Baiap2 PE=1 SV=2	1006.64	15	24	49.3	963.41	13	20	43.9	1146.99	20	25	59.1					1309.73	22	28	59.1	1159.05	21	26	54.8	1.19048	26	1.07407	9.42152
A0A087WQ95	CLIP-associating protein 1 OS=Mus musculus GN=Clasp1 PE=1 SV=1	1074.92	18	25	21.3																					26	1	1	9.33333
J3QNY1	Protein Gm9242 OS=Mus musculus GN=Gm9242 PE=4 SV=1	1133.48	18	25	46.2									289.59	5	6	30.3									26	0.142857	1	9.04762
A2A5S3	Double-stranded RNA-binding protein Staufen homolog 1 OS=Mus musculus GN=Stau1 PE=1 SV=1	1042.22	15	23	43					1139.76	20	24	47.5	364.65	8	12	29.7	1133.7	21	25	43	822.03	18	22	43	24	1.92308	1.13043	9.01784
A0A087WQM0	Protein Tns1 OS=Mus musculus GN=Tns1 PE=1 SV=1																	664.35	14	24	23.1					1	1	25	9
P97461	40S ribosomal protein S5 OS=Mus musculus GN=Rps5 PE=1 SV=3	403.35	7	11	40.2					609.75	9	13	54.9					421.79	8	10	35.3	372.59	6	11	48.5	12	14	0.916667	8.97222	D3YYM6
D3Z5X4	Protein Gm7964 OS=Mus musculus GN=Gm7964 PE=4 SV=1	1082.68	16	22	41.9																					23	1	1	8.33333
Q61468	Mesothelin OS=Mus musculus GN=Msln PE=1 SV=1	146.56	3	5	11.2					387.41	8	9	13.4					300.48	5	8	17.4					6	10	9	8.33333
B2RXP1	Leucine-rich repeat and calponin homology domain-containing protein 3 OS=Mus musculus GN=Lrch3 PE=1 SV=1	823.81	16	22	36.8																					23	1	1	8.33333
F6SBR5	Citron Rho-interacting kinase OS=Mus musculus GN=Cit PE=1 SV=2	600.32	10	22	15.2																					23	1	1	8.33333
G3UWQ7	Protein regulator of cytokinesis 1 OS=Mus musculus GN=Prc1 PE=1 SV=1	205.04	3	11	28.7					388.36	7	13	29	318.76	5	8	19.4	280.99	5	10	20.6					12	1.55556	11	8.18519	G3UY19 & G3UW86
Q3V1Z5	40S ribosomal protein S4 OS=Mus musculus GN=Rps4l PE=1 SV=1	730.46	11	16	42.7	898.61	14	15	42	1194.61	22	25	44.3	942.66	16	17	39.3	1039.19	17	21	48.5					1.0625	1.44444	22	8.16898
D3YZ62	Unconventional myosin-Va OS=Mus musculus GN=Myo5a PE=1 SV=1	846.81	17	22	14.8					46.85	1	3	3.6	642.02	14	23	16.7	1271.62	27	32	21.4	1224.43	24	30	20.4	23	0.166667	1.06452	8.07706
E9Q852	Afadin OS=Mus musculus GN=Mllt4 PE=1 SV=2	1786.42	30	46	29.9	1020.3	17	27	21.1	345.95	7	11	10.1	110.21	3	7	5.7	863.84	17	20	15.5					1.67857	1.5	21	8.05952
H3BLL3	Leucine-rich repeat and calponin homology domain-containing protein 4 OS=Mus musculus GN=Lrch4 PE=1 SV=1	149.52	3	8	19.3					304.7	8	13	35.3													9	14	1	8	H3BIX9 & Q921G6
Q9DBG3	AP-2 complex subunit beta OS=Mus musculus GN=Ap2b1 PE=1 SV=1	622.53	11	21	26					1073.66	21	25	37.2	1499.9	29	35	40	670.15	14	24	26.7	907.32	19	27	32	22	0.722222	0.892857	7.87169
D3Z2H2	Catenin delta-1 OS=Mus musculus GN=Ctnnd1 PE=1 SV=1	674.18	11	20	27.5					1697.54	28	32	43.2	1264.91	21	26	34.8	1620.97	28	37	46.8	1827.53	30	35	44.1	21	1.22222	1.05556	7.75926
V9GXL1	ELKS/Rab6-interacting/CAST family member 1 (Fragment) OS=Mus musculus GN=Erc1 PE=1 SV=1																	1257.4	18	20	57.9					1	1	21	7.66667
Q03350	Thrombospondin-2 OS=Mus musculus GN=Thbs2 PE=1 SV=2	553.96	11	16	13.7					125.68	3	4	4.6													17	5	1	7.66667
P11103	Poly [ADP-ribose] polymerase 1 OS=Mus musculus GN=Parp1 PE=1 SV=3					2389.09	34	47	41.2	829.16	15	21	27.7					931.49	16	24	32	1691.02	27	33	34.7	0.0208333	22	0.735294	7.58538
D3Z1M1	Guanine nucleotide-binding protein G(I)/G(S)/G(T) subunit beta-2 (Fragment) OS=Mus musculus GN=Gnb2 PE=1 SV=1	465.58	6	8	29.5	161.78	3	6	29.5	636.35	9	10	37.9					589.43	8	9	37.9					1.28571	11	10	7.42857
A0A0H2UH17	Ubiquitin associated protein 2-like, isoform CRA_b OS=Mus musculus GN=Ubap2l PE=1 SV=1									1143.38	17	19	29.6													1	20	1	7.33333
Q80YF6	Uroplakin-3b OS=Mus musculus GN=Upk3b PE=1 SV=1	205.26	3	5	16					422.08	8	9	38.5					246.92	4	5	21.5					6	10	6	7.33333
A0A0G2JGL1	Putative ATP-dependent RNA helicase DHX30 (Fragment) OS=Mus musculus GN=Dhx30 PE=1 SV=1	219.21	4	6	18.8					233.04	4	8	37.7					150.51	3	5	34.3					7	9	6	7.33333	Q99PU8 & A0A0G2JGY7
Q61510	E3 ubiquitin/ISG15 ligase TRIM25 OS=Mus musculus GN=Trim25 PE=1 SV=2									268.8	7	11	22.1					313.58	6	8	14.7					1	12	9	7.33333	Q5SU71
G3UWX1	Replication factor C subunit 1 OS=Mus musculus GN=Rfc1 PE=1 SV=2	732.58	11	22	24.1	671.1	11	19	22.2	473.19	10	15	16.3	369.95	8	11	13.5	582.56	12	18	20					1.15	1.33333	19	7.16111
Q8VDY4	EF-hand calcium-binding domain-containing protein 7 OS=Mus musculus GN=Efcab7 PE=2 SV=1	669.43	11	15	27.2					29.98	1	3	5.3													16	4	1	7	F6XAI7
Q3UC82	DNA ligase OS=Mus musculus GN=Lig3 PE=1 SV=1	1016.67	17	28	25.2	754.88	13	23	22.6	406.87	9	14	16.5	214.14	5	9	11.1	465.06	11	17	20.9					1.20833	1.5	18	6.90278
A0A087WS16	Protein Col6a3 OS=Mus musculus GN=Col6a3 PE=1 SV=1	458.89	8	19	9									36.39	1	3	1.9	29.44	1	1	0.4	80.08	2	5	3.7	20	0.25	0.333333	6.86111
G3V018	Heterogeneous nuclear ribonucleoprotein Q OS=Mus musculus GN=Syncrip PE=1 SV=1																	756.9	13	17	34.2					1	1	18	6.66667
A0A0J9YUS5	Eukaryotic translation initiation factor 4 gamma 1 OS=Mus musculus GN=Eif4g1 PE=1 SV=1									581.26	13	17	16.9					511.21	11	11	12.1	363.9	8	13	15.5	1	18	0.857143	6.61905
Q9DBY8	Nuclear valosin-containing protein-like OS=Mus musculus GN=Nvl PE=1 SV=1	395.51	8	13	23.3					159.86	3	8	13.9	33.93	1	1	4.3	252.58	5	12	19.5	225.61	5	10	20.6	14	4.5	1.18182	6.56061
A0A0A6YWM8	Mitogen-activated protein kinase kinase kinase kinase 4 OS=Mus musculus GN=Map4k4 PE=1 SV=1					356.79	8	12	12.6	553.52	9	17	16.4													0.0769231	18	1	6.35897
A0A0B4J1L4	Obscurin-like protein 1 OS=Mus musculus GN=Obsl1 PE=1 SV=1									491.5	11	17	20.6									651.17	14	18	21.7	1	18	0.0526316	6.35088
F6ZAX1	Polyadenylate-binding protein 1 (Fragment) OS=Mus musculus GN=Pabpc1 PE=1 SV=1	472.54	6	8	70.3					481.31	7	8	90.7													9	9	1	6.33333	P29341
B0V2N7	Annexin (Fragment) OS=Mus musculus GN=Anxa2 PE=1 SV=1									915.61	14	16	70.9													1	17	1	6.33333
F6R782	IQ domain-containing protein E (Fragment) OS=Mus musculus GN=Iqce PE=1 SV=1	678.15	11	16	33.3																					17	1	1	6.33333
B2RTK3	Histone H2B OS=Mus musculus GN=Hist1h2bm PE=1 SV=1	689.95	11	16	41.3					353.78	6	8	42.9	344.78	7	9	41.3	403.34	8	9	41.3	499.26	10	11	35.7	17	0.9	0.833333	6.24444
D3Z6F5	ATP synthase subunit alpha OS=Mus musculus GN=Atp5a1 PE=1 SV=1	178.79	3	4	11.7	141.45	3	9	22.1	587.25	11	15	31.8	571.16	11	16	39.8	554.45	11	16	31					0.5	0.941176	17	6.14706
E9Q9H2	DnaJ homolog subfamily C member 2 OS=Mus musculus GN=Dnajc2 PE=1 SV=1	100.59	2	6	18.8	76.26	2	4	8.4									343.61	9	15	28.7					1.4	1	16	6.13333
Q6Y5D8	Rho GTPase-activating protein 10 OS=Mus musculus GN=Arhgap10 PE=1 SV=2	195.76	4	17	20.5	204.25	4	12	18.6	72.97	2	7	12.6					58.39	1	8	12.6					1.38462	8	9	6.12821
P47757	F-actin-capping protein subunit beta OS=Mus musculus GN=Capzb PE=1 SV=3	302.95	5	9	39					370.71	6	7	21.7									381.99	7	10	36.8	10	8	0.0909091	6.0303	A2AMW0 & F6YHZ8
A2API8	A-kinase anchor protein 2 OS=Mus musculus GN=Akap2 PE=1 SV=1									224.03	5	7	10.6					373.46	6	8	11.1					1	8	9	6
F6U2C2	Ataxin-2 (Fragment) OS=Mus musculus GN=Atxn2 PE=1 SV=1																	563.38	10	15	20.6					1	1	16	6
E9Q5A0	60S ribosomal protein L13a OS=Mus musculus GN=Rpl13a PE=1 SV=1									494.11	9	15	22.9													1	16	1	6
P58022	Lysyl oxidase homolog 2 OS=Mus musculus GN=Loxl2 PE=1 SV=2	34.76	1	2	3.9					236.28	4	7	10.1					182.85	4	6	10.6					3	8	7	6
Q61216	Double-strand break repair protein MRE11A OS=Mus musculus GN=Mre11a PE=1 SV=1	308.23	6	10	16.3					58.98	2	4	8.4					33.5	1	1	3.7					11	5	2	6
Q922S8	Kinesin-like protein KIF2C OS=Mus musculus GN=Kif2c PE=1 SV=1									176.07	4	7	15.1					182.32	4	8	17.5					1	8	9	6	Q3TTL2
P26369	Splicing factor U2AF 65 kDa subunit OS=Mus musculus GN=U2af2 PE=1 SV=3	311.15	6	10	32.2	317.73	5	8	29.5	273.99	6	8	22.1					169.87	4	6	19.4					1.22222	9	7	5.74074	Q3KQM4
Q3T9A3	Serine/threonine-protein kinase MARK2 OS=Mus musculus GN=Mark2 PE=1 SV=1	766.56	11	14	28.5																					15	1	1	5.66667
G3UYR9	PERQ amino acid-rich with GYF domain-containing protein 2 (Fragment) OS=Mus musculus GN=Gigyf2 PE=1 SV=1	568.28	11	14	19.3																					15	1	1	5.66667
Q9CY21	Probable 18S rRNA (guanine-N(7))-methyltransferase OS=Mus musculus GN=Wbscr22 PE=1 SV=1	279.19	4	6	31.3	115.43	2	3	18.9	512.84	10	13	43.1													1.75	14	1	5.58333
P10630	Eukaryotic initiation factor 4A-II OS=Mus musculus GN=Eif4a2 PE=1 SV=2	609.93	10	14	34.6																	276.22	5	7	24.6	15	1	0.125	5.375
Q5M9K9	60S ribosomal protein L31 OS=Mus musculus GN=Rpl31 PE=1 SV=1	483.68	8	12	50.4	327.15	5	11	61.6	473.61	9	13	56					496.72	9	10	48	482.07	10	10	48	1.08333	14	1	5.36111
Q3TQ70	Beta1 subnuit of GTP-binding protein OS=Mus musculus GN=Gnb1 PE=1 SV=1									787	13	14	45.6									573.63	8	11	43.2	1	15	0.0833333	5.36111
E9Q1N8	Uncharacterized protein OS=Mus musculus GN=Gm18025 PE=3 SV=2																	603.77	12	13	43.4					1	1	14	5.33333
Q8K4L2	Archvillin OS=Mus musculus GN=Svil PE=1 SV=1	523.88	8	13	9.7																					14	1	1	5.33333
Q9R0Q4	Mortality factor 4-like protein 2 OS=Mus musculus GN=Morf4l2 PE=1 SV=1	130.68	3	4	16.7					115.79	3	5	23.3					33.9	1	4	19.4					5	6	5	5.33333	A2AEB3
Q3TYK3	Nuclear factor 1 OS=Mus musculus GN=Nfix PE=1 SV=1	208.25	4	7	28.9	305.34	4	8	36.6	507.04	9	13	44.8													0.888889	14	1	5.2963
E9PW66	Nucleosome assembly protein 1-like 1 OS=Mus musculus GN=Nap1l1 PE=1 SV=1	324.48	6	11	20.8	114.4	2	5	14.8	519.27	9	12	28.7					618.67	12	15	28.7	771.3	14	17	28.7	2	13	0.888889	5.2963	P28656
P17156	Heat shock-related 70 kDa protein 2 OS=Mus musculus GN=Hspa2 PE=1 SV=2	584.21	7	10	17.1	569.46	7	8	14.2	845.65	11	12	14.8													1.22222	13	1	5.07407
Q9R099	Transducin beta-like protein 2 OS=Mus musculus GN=Tbl2 PE=1 SV=2	333.81	6	6	15.6	181.8	3	5	12.4	455.6	10	12	33.9													1.16667	13	1	5.05556
E9PV04	Protein Gm8994 OS=Mus musculus GN=Gm8994 PE=3 SV=2	429.72	8	15	35.3	441.4	8	13	31.4	515.96	10	12	30.2													1.14286	13	1	5.04762
Q8BML9	Glutaminyl-tRNA synthetase OS=Mus musculus GN=Qars PE=1 SV=1									219.14	6	13	23.7									227.55	7	10	16.8	1	14	0.0909091	5.0303
Q9CZX8	40S ribosomal protein S19 OS=Mus musculus GN=Rps19 PE=1 SV=3	547.93	9	13	43.4	643.82	11	11	50.3	569.59	10	12	42.8					526.9	10	10	45.5	541.59	9	12	46.2	1.16667	13	0.846154	5.00427
A0A087WQA5	TAR DNA-binding protein 43 (Fragment) OS=Mus musculus GN=Tardbp PE=1 SV=1	335.18	6	7	33					181.22	4	5	26													8	6	1	5	A0A087WSC6 & Q544R5 & A0A087WS17
E9Q453	Tropomyosin alpha-1 chain OS=Mus musculus GN=Tpm1 PE=1 SV=1	390.8	7	12	47.8																					13	1	1	5
Q07139	Protein ECT2 OS=Mus musculus GN=Ect2 PE=1 SV=2									173.92	4	6	8.9					185.81	4	6	10.8					1	7	7	5
A0A087WQQ5	Kinectin OS=Mus musculus GN=Ktn1 PE=1 SV=1									336.34	7	12	15.4													1	13	1	5
D3Z1J5	Palladin (Fragment) OS=Mus musculus GN=Palld PE=1 SV=1	433.04	7	12	49.4					889.15	16	17	61	929.97	16	19	59.8	1112.33	17	18	62.2	1004.32	17	18	61	13	0.9	1	4.96667
D3YYU8	Obscurin-like protein 1 OS=Mus musculus GN=Obsl1 PE=1 SV=1	151.63	3	6	5.1	272.28	5	9	7.5					504.61	10	15	10.8	349.25	6	13	8.8					0.7	0.0625	14	4.92083
P47758	Signal recognition particle receptor subunit beta OS=Mus musculus GN=Srprb PE=1 SV=1									791.38	13	14	59.1	492.02	9	9	49.4	560.08	10	11	54.3					1	1.5	12	4.83333
A0A0G2JDK9	60S ribosomal protein L9 (Fragment) OS=Mus musculus GN=Rpl9 PE=1 SV=1	250.88	4	6	22.7	240.67	4	4	23.3									605.86	11	11	51.7					1.4	1	12	4.8
P62843	40S ribosomal protein S15 OS=Mus musculus GN=Rps15 PE=1 SV=2	260.66	5	12	27.6	101.77	2	3	27.6	260.02	6	9	46.2													3.25	10	1	4.75
Q3UYU2	HpaII tinys locus 9c, isoform CRA_a OS=Mus musculus GN=Trmt2a PE=1 SV=1	187.07	4	10	20.7					436.45	10	12	23	220.09	5	6	10.1	199.09	5	7	13.2	227.27	5	5	12.2	11	1.85714	1.33333	4.73016
Q0VGY8	Protein TANC1 OS=Mus musculus GN=Tanc1 PE=1 SV=2	849.35	15	20	13.5	178.21	3	9	6.8	41	1	2	1.3					208.54	4	8	6.8					2.1	3	9	4.7
Q3TWV4	AP-2 complex subunit mu OS=Mus musculus GN=Ap2m1 PE=1 SV=1	226.48	4	16	37.9	317.88	7	15	37									286.38	6	11	29.6					1.0625	1	12	4.6875
D3Z722	40S ribosomal protein S19 OS=Mus musculus GN=Rps19 PE=1 SV=1									569.59	10	11	28.8													1	12	1	4.66667
E9Q452	Tropomyosin alpha-1 chain OS=Mus musculus GN=Tpm1 PE=1 SV=1	341.54	6	11	38.4																					12	1	1	4.66667
Q564E2	L-lactate dehydrogenase OS=Mus musculus GN=Ldha PE=1 SV=1									116.93	3	5	19					141.6	3	6	20.8					1	6	7	4.66667
Q6A4J8	Ubiquitin carboxyl-terminal hydrolase 7 OS=Mus musculus GN=Usp7 PE=1 SV=1	104.56	2	3	3.4					49.17	1	4	6.3					67.8	2	4	5.9					4	5	5	4.66667
Q99NH0	Ankyrin repeat domain-containing protein 17 OS=Mus musculus GN=Ankrd17 PE=1 SV=2	190.94	3	11	7																					12	1	1	4.66667
Q8VCD5	Mediator of RNA polymerase II transcription subunit 17 OS=Mus musculus GN=Med17 PE=1 SV=1									125.87	3	6	9.4					35.01	1	5	7.7					1	7	6	4.66667
Q60996	Serine/threonine-protein phosphatase 2A 56 kDa regulatory subunit gamma isoform OS=Mus musculus GN=Ppp2r5c PE=1 SV=2	51.37	1	4	9.5					187.92	4	7	16.4					167.58	4	6	16.6	80.15	2	6	12.2	5	8	1	4.66667
G5E8R2	Tropomyosin 1, alpha, isoform CRA_k OS=Mus musculus GN=Tpm1 PE=1 SV=1	432.44	8	12	46.8					155.22	3	6	33.9	1173.24	19	24	62.9	548.35	12	14	50.8	1095.51	18	24	64.1	13	0.28	0.6	4.62667
A2AL12	Heterogeneous nuclear ribonucleoprotein A3 OS=Mus musculus GN=Hnrnpa3 PE=1 SV=1	1083.25	17	25	57.5	810.28	11	16	36.5	484.21	8	10	36.8					281.63	4	6	28.3	197.43	4	6	30.2	1.52941	11	1	4.5098
F6ZSG0	Protein LYRIC (Fragment) OS=Mus musculus GN=Mtdh PE=1 SV=1	137.86	3	7	20.8					292.3	6	7	25.6	73.03	2	7	19.9	237.3	6	8	22.8	32.08	1	1	6.5	8	1	4.5	4.5
G5E8S8	MAGUK p55 subfamily member 7 OS=Mus musculus GN=Mpp7 PE=1 SV=1	82.67	2	3	6.4					169.71	5	6	16.3	43.71	1	1	5	59.96	2	5	14.2					4	3.5	6	4.5
Q8BML1	Protein-methionine sulfoxide oxidase MICAL2 OS=Mus musculus GN=Mical2 PE=1 SV=1	42.21	1	6	7.8					83.56	2	4	5.8					130.68	4	8	11.3	63.98	2	5	8	7	5	1.5	4.5
G5E902	MCG10343, isoform CRA_b OS=Mus musculus GN=Slc25a3 PE=1 SV=1	204.3	4	7	17.9	225.35	4	8	19.8	339.98	7	10	31					323.12	7	10	29.3	273.38	5	6	20.4	0.888889	11	1.57143	4.48677
A6PWS5	Gelsolin (Fragment) OS=Mus musculus GN=Gsn PE=1 SV=1	513.18	9	11	34.7					393.07	6	8	34.7	782.49	13	17	35.1	534.9	9	13	35.1	599.07	11	14	34.7	12	0.5	0.933333	4.47778
A2AFQ9	Gem-associated protein 5 OS=Mus musculus GN=Gemin5 PE=1 SV=1	105.44	2	5	4.7	53.7	1	2	3	80.54	2	9	7.2					176.83	4	6	5.6	119.3	2	4	4.2	2	10	1.4	4.46667
D3YU89	Citron Rho-interacting kinase OS=Mus musculus GN=Cit PE=1 SV=1					446.84	8	23	13.9					67.91	2	2	3.1	368.48	7	12	9.3					0.0416667	0.333333	13	4.45833
A2AF47	Dedicator of cytokinesis protein 11 OS=Mus musculus GN=Dock11 PE=1 SV=1	701.47	14	26	13.3	90.19	2	6	3.7	313.69	7	14	8	33.83	1	1	1.2	247.06	6	11	7.2	98.12	3	5	4.9	3.85714	7.5	2	4.45238
O08579	Emerin OS=Mus musculus GN=Emd PE=1 SV=1	431.43	6	10	48.3	606.11	10	12	52.9	347.12	7	10	44.4	323.27	6	7	34	328.7	5	10	54.4					0.846154	1.375	11	4.40705
D3Z0L8	Alpha-actinin-4 (Fragment) OS=Mus musculus GN=Actn4 PE=1 SV=1	542.43	8	10	50																					11	1	1	4.33333
F6YLI0	Caprin-1 (Fragment) OS=Mus musculus GN=Caprin1 PE=1 SV=1									169.31	3	4	15.7					243.91	4	6	15.7					1	5	7	4.33333
E9PXC0	Protein Srp54b OS=Mus musculus GN=Srp54c PE=1 SV=1	298.67	7	10	30																					11	1	1	4.33333
Q9ESL4	Mitogen-activated protein kinase kinase kinase MLT OS=Mus musculus GN=Zak PE=1 SV=1	37.5	1	3	5.2					205.62	4	5	10.1	34.39	1	2	4.5	199.08	4	6	9.9					4	2	7	4.33333
Q8BM55	Transmembrane protein 214 OS=Mus musculus GN=Tmem214 PE=1 SV=1	263.89	5	10	15.7																					11	1	1	4.33333
P60469	Liprin-alpha-3 OS=Mus musculus GN=Ppfia3 PE=1 SV=2									159.97	4	4	5.4					94.98	2	6	6.6					1	5	7	4.33333
Q91YR5	Methyltransferase-like protein 13 OS=Mus musculus GN=Mettl13 PE=1 SV=1									185.85	4	6	9.7					65.67	2	4	6.3					1	7	5	4.33333
Q4FJV4	Annexin OS=Mus musculus GN=Anxa1 PE=1 SV=1									213.17	4	6	26					27.97	1	4	20.2					1	7	5	4.33333
Q5FWB7	Fructose-bisphosphate aldolase OS=Mus musculus GN=Aldoa PE=1 SV=1									50.23	1	2	6.3					129.98	3	8	33.8					1	3	9	4.33333
P56960	Exosome component 10 OS=Mus musculus GN=Exosc10 PE=1 SV=2									46.75	1	7	11.2					64.46	2	3	4.3					1	8	4	4.33333
A2AU62	RNA-binding protein Raly (Fragment) OS=Mus musculus GN=Raly PE=1 SV=1	246.24	5	7	38.9	301.89	6	7	34.2	251.93	5	6	26.2					152.14	4	4	17.1					1	7	5	4.33333
P62631	Elongation factor 1-alpha 2 OS=Mus musculus GN=Eef1a2 PE=1 SV=1	472.42	8	10	17.3					580.84	10	12	18.4	637.62	10	14	25.7	643.24	11	14	16.8	836.67	15	16	16.8	11	0.866667	0.882353	4.24967
G5E896	Enhancer of mRNA decapping 4, isoform CRA_b OS=Mus musculus GN=Edc4 PE=1 SV=1	86.06	2	10	8					127.36	3	4	4.9	110.91	2	6	6.5									11	0.714286	1	4.2381
Q8K0V4	CCR4-NOT transcription complex subunit 3 OS=Mus musculus GN=Cnot3 PE=1 SV=1	327.09	5	12	19.8	243.57	3	11	15.7	183.97	5	10	17.7					157.27	4	4	10.8	134.28	3	7	14.8	1.08333	11	0.625	4.23611
P80317	T-complex protein 1 subunit zeta OS=Mus musculus GN=Cct6a PE=1 SV=3	171.02	3	9	18.3					772.89	15	21	49	655.54	13	15	43.5	635.52	14	18	34.5	660.2	14	15	37.3	10	1.375	1.1875	4.1875
Q3UV11	Keratin, type II cytoskeletal 6B OS=Mus musculus GN=Krt6b PE=1 SV=1	234.88	4	10	16.4									149.76	3	3	8.1	152.53	3	4	6.9	160.79	3	3	8.1	11	0.25	1.25	4.16667
A2AJI0	MAP7 domain-containing protein 1 OS=Mus musculus GN=Map7d1 PE=1 SV=1	109.84	2	5	11.1	160.67	3	6	10.3	327.95	7	9	14.4					176.81	4	10	15.7	173.31	4	6	12.4	0.857143	10	1.57143	4.14286
Q5SQX6	Cytoplasmic FMR1-interacting protein 2 OS=Mus musculus GN=Cyfip2 PE=1 SV=2	109.86	2	8	10.1	98.27	2	6	8.2					232.8	5	7	7.4	335.03	7	10	9.3					1.28571	0.125	11	4.1369
Q8CFI7	DNA-directed RNA polymerase II subunit RPB2 OS=Mus musculus GN=Polr2b PE=1 SV=2	40.73	1	3	4.9					138.62	4	5	7.7					172.8	4	6	8.7	57.83	2	2	3	4	6	2.33333	4.11111
Q3UQ28	Peroxidasin homolog OS=Mus musculus GN=Pxdn PE=1 SV=2									448.63	10	10	8.7									90.47	2	2	2.2	1	11	0.333333	4.11111
A0ELI5	Enhancer of mRNA-decapping protein 3 OS=Mus musculus GN=Edc3 PE=1 SV=1	58.8	1	3	7.7					210.51	5	7	18.7	49.54	1	5	15.6	154.47	4	6	17.1					4	1.33333	7	4.11111
A2AGT5	Cytoskeleton-associated protein 5 OS=Mus musculus GN=Ckap5 PE=1 SV=1	655.04	11	26	17.5	387.87	7	16	11.9	157.69	3	7	6.3					479.68	11	15	10.8	25.81	1	5	3.6	1.58824	8	2.66667	4.08497
B1AX98	Leucine rich repeat containing 47 OS=Mus musculus GN=Lrrc47 PE=1 SV=1									235.21	6	10	20.5									82.36	2	3	8.8	1	11	0.25	4.08333
F6YTZ4	Protein Gm6576 OS=Mus musculus GN=Gm6576 PE=3 SV=2					570.1	9	10	32.8					487.22	8	8	36.9	548.06	10	11	40.1					0.0909091	0.111111	12	4.06734
Q3ULW8	Poly [ADP-ribose] polymerase OS=Mus musculus GN=Parp3 PE=1 SV=1	341.61	6	10	23.8																	26.44	1	4	9.4	11	1	0.2	4.06667
Q00PI9	Heterogeneous nuclear ribonucleoprotein U-like protein 2 OS=Mus musculus GN=Hnrnpul2 PE=1 SV=2	193.81	4	10	19.2	130.13	2	4	9.8	36.68	1	4	8.6					101.54	3	4	8.7					2.2	5	5	4.06667
A0A0J9YU82	StAR-related lipid transfer protein 13 OS=Mus musculus GN=Stard13 PE=1 SV=1	125.39	3	4	5					215.08	5	11	14.1	32.11	1	1	2.2	142.93	3	7	10.6	140.95	4	6	9	5	6	1.14286	4.04762
A0A0A6YW53	Mitogen-activated protein kinase kinase kinase kinase 4 OS=Mus musculus GN=Map4k4 PE=1 SV=1													360.04	8	9	11.3	262.95	6	10	8.2					1	0.1	11	4.03333
B2RXM2	EG627828 protein OS=Mus musculus GN=Gm6793 PE=1 SV=1					934.78	13	17	32.8	543.43	9	10	32.8													0.0555556	11	1	4.01852
A0A0A6YWN3	Protein Ighv13-1 (Fragment) OS=Mus musculus GN=Ighv13-2 PE=4 SV=1									354.44	6	9	73.1													1	10	1	4
Q9CQV8	14-3-3 protein beta/alpha OS=Mus musculus GN=Ywhab PE=1 SV=3									150.26	4	4	16.3					187.07	4	5	20.7					1	5	6	4
Q9Z1Q9	Valine--tRNA ligase OS=Mus musculus GN=Vars PE=1 SV=1									97.7	2	5	5.1					203.27	4	4	5.1					1	6	5	4
Q9ES28	Rho guanine nucleotide exchange factor 7 OS=Mus musculus GN=Arhgef7 PE=1 SV=2																	268.37	6	9	15.5					1	1	10	4
A0A087WNM1	SLIT-ROBO Rho GTPase-activating protein 2 OS=Mus musculus GN=Srgap2 PE=1 SV=1	217.2	4	9	12.1																					10	1	1	4
J3QM81	Ankyrin repeat and zinc finger domain-containing protein 1 OS=Mus musculus GN=Ankzf1 PE=1 SV=1	39.22	1	2	3.2					63.68	2	5	9.1					113.08	2	2	4.8					3	6	3	4
Q8R3H7	Heparan sulfate 2-O-sulfotransferase 1 OS=Mus musculus GN=Hs2st1 PE=1 SV=2	57.82	1	2	7					86.13	2	4	13.5					68.23	2	3	9.8					3	5	4	4
Q99K74	Mediator of RNA polymerase II transcription subunit 24 OS=Mus musculus GN=Med24 PE=1 SV=1	79.35	1	5	7.6					127.21	2	4	6													6	5	1	4
G3UWN2	CAD protein OS=Mus musculus GN=Cad PE=1 SV=1	182.61	3	9	6																					10	1	1	4
Q9CQ73	Plakophilin 2 OS=Mus musculus GN=Pkp2 PE=1 SV=1									65.73	2	4	8.4					66.33	1	5	9.1					1	5	6	4
P52332	Tyrosine-protein kinase JAK1 OS=Mus musculus GN=Jak1 PE=1 SV=1	124.15	3	9	9.3																					10	1	1	4
H7BXB1	Casein kinase I isoform alpha OS=Mus musculus GN=Csnk1a1 PE=1 SV=1									194.06	6	9	29.3					189.84	3	5	15.9	112.73	3	5	15.9	1	10	1	4
Q545R0	Catenin (Cadherin associated protein), alpha 1 OS=Mus musculus GN=Ctnna1 PE=1 SV=1	509.08	9	11	15.9	144.69	3	3	6.8	439.35	8	14	22.1	46.89	1	1	4.6	423.96	8	14	20.5	318.83	8	9	14.8	3	7.5	1.5	4
Q8K4F6	Probable 28S rRNA (cytosine-C(5))-methyltransferase OS=Mus musculus GN=Nsun5 PE=2 SV=2									40.96	1	4	14.8					30	1	5	15.7					1	5	6	4
E9PVX6	Protein Mki67 OS=Mus musculus GN=Mki67 PE=1 SV=1	38.85	1	5	4.4													30.02	1	4	2.1					6	1	5	4
Z4YJV4	2-oxoglutarate dehydrogenase, mitochondrial OS=Mus musculus GN=Ogdh PE=1 SV=1									32.88	1	5	5.1					27.31	1	4	3.7					1	6	5	4
H3BIZ7	FERM domain-containing protein 4A OS=Mus musculus GN=Frmd4a PE=1 SV=1	186	4	8	10					370.32	8	11	15.2	213.56	5	5	7	441.22	10	11	14	400.45	9	11	15.8	9	2	1	4
Q8C4C9	DnaJ (Hsp40) homolog, subfamily B, member 12, isoform CRA_d OS=Mus musculus GN=Dnajb12 PE=1 SV=1	162.35	3	3	16.9	40.08	1	3	11.4	414.41	7	9	34.9					235.41	4	5	14.6	173.22	3	6	21.7	1	10	0.857143	3.95238
Q7TSC1	Protein PRRC2A OS=Mus musculus GN=Prrc2a PE=1 SV=1	1254.71	23	38	23.8	1182.96	22	38	22.7	181.42	5	8	7					288.04	7	10	7.7	85.46	2	5	5.2	1	9	1.83333	3.94444
Q5BL18	Matrin 3 OS=Mus musculus GN=Matr3 PE=1 SV=1	94.76	2	9	15.1	49.88	1	5	7.2	140.23	3	9	18.9									31.82	1	7	12.5	1.66667	10	0.125	3.93056
F6TFN2	Protein Lmo7 (Fragment) OS=Mus musculus GN=Lmo7 PE=1 SV=1	241.37	4	10	14					106.4	3	6	9.4	322.15	7	12	14.5	118.65	3	7	11.4	1221.16	24	32	36.8	11	0.538462	0.242424	3.92696
Q6DFV1	Condensin-2 complex subunit G2 OS=Mus musculus GN=Ncapg2 PE=1 SV=2	295.9	6	11	13.3	78.42	2	7	6.2	167.93	4	8	10.6					44.28	1	4	5.7	79.82	2	3	3.5	1.5	9	1.25	3.91667
Q3UCF2	Cell division cycle 5-like protein OS=Mus musculus GN=Cdc5l PE=1 SV=1	56.44	1	4	12.1					76.75	2	4	9					151.81	3	6	13.1	78.4	1	3	7.6	5	5	1.75	3.91667
Q9R190	Metastasis-associated protein MTA2 OS=Mus musculus GN=Mta2 PE=1 SV=1	157.86	3	5	9.1	164.16	3	7	11.4	63.17	2	3	8.2					135.4	3	6	12.4					0.75	4	7	3.91667
Q8CGF1	Rho GTPase-activating protein 29 OS=Mus musculus GN=Arhgap29 PE=1 SV=1	333.28	7	11	11.3	87.75	2	6	5.5	162.33	3	8	8.4					226.97	5	8	10.2	188.77	6	8	9.6	1.71429	9	1	3.90476
G5E8E1	Leucine rich repeat (In FLII) interacting protein 1, isoform CRA_e OS=Mus musculus GN=Lrrfip1 PE=1 SV=1	162.46	3	4	15.2	80.48	1	2	8.9	388.33	6	8	30.6													1.66667	9	1	3.88889
Q80YR4	Zinc finger protein 598 OS=Mus musculus GN=Znf598 PE=1 SV=1	209.19	3	7	11.6	152.76	3	6	9.8	232.32	4	7	8.7					63.42	1	4	9	66.33	1	1	3.9	1.14286	8	2.5	3.88095
F7BGR7	Protein Gm21992 OS=Mus musculus GN=Gm21992 PE=1 SV=1	123.47	2	4	6.7	96.77	1	3	6.7	148.17	3	8	23.3					80.14	1	4	8.6	77.46	2	3	6.9	1.25	9	1.25	3.83333
Q3TK95	Eukaryotic translation initiation factor 4E OS=Mus musculus GN=Eif4e PE=1 SV=1	228.26	3	6	37.8	251.18	3	7	42.4	378.23	6	8	41					236.2	5	7	37.3	73.64	2	4	29	0.875	9	1.6	3.825
Q9CQ19	Myosin regulatory light polypeptide 9 OS=Mus musculus GN=Myl9 PE=1 SV=3	597.01	8	9	44.8					452.76	8	8	45.3	907.58	13	14	62.2	448.36	8	9	45.3	560.92	9	11	55.8	10	0.6	0.833333	3.81111
A0A0A6YWK1	CLIP-associating protein 1 (Fragment) OS=Mus musculus GN=Clasp1 PE=1 SV=1	214.49	3	5	30.1					318.89	5	6	32.1	242.7	4	4	25.4	157.52	2	3	21.1					6	1.4	4	3.8
Q60715	Prolyl 4-hydroxylase subunit alpha-1 OS=Mus musculus GN=P4ha1 PE=1 SV=2	224.63	4	5	11.6	157.89	3	4	9	174.93	4	8	20.2													1.2	9	1	3.73333
Q8CGC6	RNA-binding protein 28 OS=Mus musculus GN=Rbm28 PE=1 SV=4	149.91	3	7	9.6	39.05	1	6	12.4	98.33	3	7	11.7					45.02	1	1	6.9					1.14286	8	2	3.71429
O88322	Nidogen-2 OS=Mus musculus GN=Nid2 PE=1 SV=2	277.29	5	9	10.2	119.2	2	6	5.8	268.58	6	8	8.7					64.99	1	4	4.5	161.72	4	6	7.6	1.42857	9	0.714286	3.71429
Q8BG81	Polymerase delta-interacting protein 3 OS=Mus musculus GN=Poldip3 PE=1 SV=1					297.31	5	8	24.8									386.49	7	9	28.1					0.111111	1	10	3.7037
Q9QWT9	Kinesin-like protein KIFC1 OS=Mus musculus GN=Kifc1 PE=1 SV=2	153.79	3	8	12.3					294.12	6	7	12.5	214.88	4	8	11.7	308.36	7	11	20.3	349.55	7	9	18.4	9	0.888889	1.2	3.6963
Q8R3P2	Probable E3 ubiquitin-protein ligase DTX2 OS=Mus musculus GN=Dtx2 PE=1 SV=2	600.95	9	10	18.1	498.78	8	8	15.7	368.55	6	8	17.6					240.87	4	5	13.4	335.63	6	6	12	1.22222	9	0.857143	3.69312
A0A0G2JFF1	Serine/threonine-protein phosphatase (Fragment) OS=Mus musculus GN=Ppp1cc PE=1 SV=1					489.11	7	7	29.1	424.19	7	9	30.1					518.41	10	12	34.6	630.6	11	13	34.6	0.125	10	0.928571	3.68452
B2RX66	MCG124812 OS=Mus musculus GN=Taok1 PE=1 SV=1	40.75	1	7	7.9					437	8	13	17.3	345.46	8	9	13.1	440.77	9	17	19.8	344.91	7	10	14.5	8	1.4	1.63636	3.67879
A0A087WRZ7	Myosin light chain 1/3, skeletal muscle isoform OS=Mus musculus GN=Myl1 PE=1 SV=1									212.48	4	4	17.4					251.58	4	4	17.4					1	5	5	3.66667
G3UWS4	Serine/threonine-protein phosphatase 2A 65 kDa regulatory subunit A beta isoform OS=Mus musculus GN=Ppp2r1b PE=1 SV=1	57.88	1	1	5.5													385.17	6	7	12.5					2	1	8	3.66667
A2A513	Keratin, type I cytoskeletal 10 OS=Mus musculus GN=Krt10 PE=1 SV=1																	367.4	6	8	13					1	1	9	3.66667
Q9JKC8	AP-3 complex subunit mu-1 OS=Mus musculus GN=Ap3m1 PE=1 SV=1																	345.33	7	8	23.2					1	1	9	3.66667
Q68FG2	Protein Sptbn2 OS=Mus musculus GN=Sptbn2 PE=1 SV=1	38.27	1	1	2.3													255.49	5	7	3.4					2	1	8	3.66667
Q9Z2C6	Uroplakin-1b OS=Mus musculus GN=Upk1b PE=2 SV=3	52.64	1	2	8.5					179.52	3	4	12.7					28.11	1	2	8.1					3	5	3	3.66667
Q9JLQ0	CD2-associated protein OS=Mus musculus GN=Cd2ap PE=1 SV=3									62.09	2	3	8.9					171.66	4	5	12.6					1	4	6	3.66667
G5E8B1	Protein tyrosine phosphatase, non-receptor type 13 OS=Mus musculus GN=Ptpn13 PE=1 SV=1	227.02	4	8	4.7																					9	1	1	3.66667
Q9JHU9	Inositol-3-phosphate synthase 1 OS=Mus musculus GN=Isyna1 PE=1 SV=1									178.85	4	6	13.6					29.23	1	2	4.5					1	7	3	3.66667
O70589	Peripheral plasma membrane protein CASK OS=Mus musculus GN=Cask PE=1 SV=2	194.96	4	8	11.4																					9	1	1	3.66667
A0A0B4J1E3	DNA-binding protein SMUBP-2 OS=Mus musculus GN=Ighmbp2 PE=1 SV=1									77.18	2	4	4.9					89.42	3	4	4.1					1	5	5	3.66667
A2A517	Cytohesin-1 (Fragment) OS=Mus musculus GN=Cyth1 PE=1 SV=1	52.11	1	4	7.4					101.93	2	4	7.6													5	5	1	3.66667
P05132	cAMP-dependent protein kinase catalytic subunit alpha OS=Mus musculus GN=Prkaca PE=1 SV=3	38.51	1	2	12.3					71.39	2	3	12.3					43.59	1	3	12.3					3	4	4	3.66667
P58468	Protein FAM207A OS=Mus musculus GN=Fam207a PE=1 SV=1									82.78	2	4	20.1					55.54	2	4	26.5					1	5	5	3.66667
O54781	SRSF protein kinase 2 OS=Mus musculus GN=Srpk2 PE=1 SV=2	51.64	1	3	6.9	54.83	1	3	5	98.19	3	4	8.7					106.34	3	4	8.5					1	5	5	3.66667
Q04750	DNA topoisomerase 1 OS=Mus musculus GN=Top1 PE=1 SV=2	36.96	1	8	13.2																					9	1	1	3.66667
Q99JX7	Nuclear RNA export factor 1 OS=Mus musculus GN=Nxf1 PE=1 SV=3	45.43	1	6	10.8	48.12	1	4	9.5	168.96	4	7	15.7					113.7	3	5	9.9	31.66	1	3	7.4	1.4	8	1.5	3.63333
Q5EBQ6	60S ribosomal protein L9 OS=Mus musculus GN=Rpl9 PE=1 SV=1	438.03	6	8	30.7					830.52	15	17	71.9	832.19	14	18	72.4	736.52	13	14	71.9	566.28	12	15	71.9	9	0.947368	0.9375	3.62829
H3BKR2	Guanine nucleotide-binding protein G(I)/G(S)/G(T) subunit beta-1 (Fragment) OS=Mus musculus GN=Gnb1 PE=1 SV=6	304.35	5	6	24.5	115.83	2	3	12.1					648.33	9	11	45.1	494.21	7	8	33					1.75	0.0833333	9	3.61111
Q9JLQ2	ARF GTPase-activating protein GIT2 OS=Mus musculus GN=Git2 PE=1 SV=2									317.53	8	8	18.2					224.7	5	7	12.1	375.16	7	9	15.1	1	9	0.8	3.6
P63330	Serine/threonine-protein phosphatase 2A catalytic subunit alpha isoform OS=Mus musculus GN=Ppp2ca PE=1 SV=1					55.09	1	5	17.2	333.49	5	9	29.8					178.86	3	4	27.5	225.01	4	7	27.5	0.166667	10	0.625	3.59722
A2ADH1	Magnesium transporter protein 1 OS=Mus musculus GN=Magt1 PE=1 SV=1									207.38	5	7	16					134.19	3	4	7.9	50.86	1	2	5.2	1	8	1.66667	3.55556
P61164	Alpha-centractin OS=Mus musculus GN=Actr1a PE=1 SV=1	38.11	1	1	7.7					116.97	3	6	24.2					79.22	2	5	20.5	86.79	2	3	10.6	2	7	1.5	3.5
P42208	Septin-2 OS=Mus musculus GN=Sept2 PE=1 SV=2	381.49	6	8	27.1					483.74	9	11	47.1	977.06	15	18	58.4	1113.78	18	21	59.3	1569.54	24	26	69.8	9	0.631579	0.814815	3.48213
Q8BYL4	Tyrosine--tRNA ligase, mitochondrial OS=Mus musculus GN=Yars2 PE=1 SV=2									151.18	3	7	23.3					172.34	4	6	23.5	76.98	2	4	15.3	1	8	1.4	3.46667
Q9JHW4	Selenocysteine-specific elongation factor OS=Mus musculus GN=Eefsec PE=1 SV=2									191.37	4	7	20.2					44.37	1	3	14.8	74.94	1	2	12	1	8	1.33333	3.44444
Q545V8	Casein kinase II subunit alpha~ OS=Mus musculus GN=Csnk2a2 PE=1 SV=1	128.57	3	5	19.1					120.53	3	6	22.3	94	2	2	6.9	97.77	2	5	15.4	33.93	1	2	8.9	6	2.33333	2	3.44444
D3YTQ3	Heterogeneous nuclear ribonucleoprotein D-like OS=Mus musculus GN=Hnrnpdl PE=1 SV=1	205.84	4	6	19.8									87.72	2	2	4.3	62.88	2	2	4.3					7	0.333333	3	3.44444
Q8BP47	Asparagine--tRNA ligase, cytoplasmic OS=Mus musculus GN=Nars PE=1 SV=2	75.63	1	6	14.3					862.27	16	20	37.9	519.41	8	11	27.2	669.76	14	16	31.7	229.92	5	10	25.4	7	1.75	1.54545	3.43182
Q8BKC5	Importin-5 OS=Mus musculus GN=Ipo5 PE=1 SV=3	41.63	1	1	3.3					274.54	5	5	7.4					292.24	7	14	16.6	165.67	4	6	7.1	2	6	2.14286	3.38095
P23242	Gap junction alpha-1 protein OS=Mus musculus GN=Gja1 PE=1 SV=2	583.98	8	16	38.5	187.7	3	7	26.2	190.34	3	5	17.5	38.69	1	1	5.2	126.97	3	4	16					2.125	3	5	3.375
D3Z158	Protein Qars OS=Mus musculus GN=Qars PE=1 SV=1													127.54	3	7	14.6	263.14	7	8	14.6					1	0.125	9	3.375
Q8CJG1	Protein argonaute-1 OS=Mus musculus GN=Ago1 PE=1 SV=2	235.1	5	10	18	272.24	5	9	13	177.2	4	7	11.7													1.1	8	1	3.36667
Q8K4G5	Actin-binding LIM protein 1 OS=Mus musculus GN=Ablim1 PE=1 SV=1									341.44	5	7	15.2													1	8	1	3.33333
Q5SVI0	Calcium/calmodulin-dependent protein kinase type II subunit beta OS=Mus musculus GN=Camk2b PE=1 SV=1	293.28	5	7	12.4																					8	1	1	3.33333
P31230	Aminoacyl tRNA synthase complex-interacting multifunctional protein 1 OS=Mus musculus GN=Aimp1 PE=1 SV=2									264.64	5	7	38.1													1	8	1	3.33333
D3YVJ6	Protein DEK (Fragment) OS=Mus musculus GN=Dek PE=1 SV=1									51.08	1	3	13.2					178.54	4	4	20.9					1	4	5	3.33333
E9Q9A5	Bifunctional polynucleotide phosphatase/kinase OS=Mus musculus GN=Pnkp PE=1 SV=1									207	4	7	20.6													1	8	1	3.33333
Q62181	Semaphorin-3C OS=Mus musculus GN=Sema3c PE=1 SV=2									118.12	3	5	8.1					71.01	2	2	2.9					1	6	3	3.33333
F6YBV1	CCR4-NOT transcription complex subunit 3 (Fragment) OS=Mus musculus GN=Cnot3 PE=1 SV=1	181.33	3	7	18.2																					8	1	1	3.33333
A2A8L1	Chromodomain-helicase-DNA-binding protein 5 OS=Mus musculus GN=Chd5 PE=1 SV=1	166.3	3	7	6.2																					8	1	1	3.33333
E2S038	Forkhead box protein P1 OS=Mus musculus GN=Foxp1 PE=1 SV=1	159.13	3	7	11.2																					8	1	1	3.33333
Q9QXB9	Developmentally-regulated GTP-binding protein 2 OS=Mus musculus GN=Drg2 PE=1 SV=1									110.24	3	4	12.6					43.14	1	3	15.4					1	5	4	3.33333
A0A087WPH7	26S protease regulatory subunit 6A (Fragment) OS=Mus musculus GN=Psmc3 PE=1 SV=4	48.72	1	1	4.9					56.88	1	2	10.2					43.69	1	4	18.7					2	3	5	3.33333
A2ATP5	Myelin expression factor 2 OS=Mus musculus GN=Myef2 PE=1 SV=1	35.11	1	3	5.6					111.33	3	4	8.2													4	5	1	3.33333
Q3UM33	Histone deacetylase OS=Mus musculus GN=Hdac3 PE=1 SV=1									61.15	2	3	9.1					71.37	1	4	11.9					1	4	5	3.33333
F7AAC3	Leucine-rich repeat and calponin homology domain-containing protein 2 (Fragment) OS=Mus musculus GN=Lrch2 PE=1 SV=1									130.04	3	7	21.8													1	8	1	3.33333
Q9JM52	Misshapen-like kinase 1 OS=Mus musculus GN=Mink1 PE=1 SV=3									128.86	3	7	5.7													1	8	1	3.33333
E9PUR0	Protein Ankhd1 OS=Mus musculus GN=Ankhd1 PE=1 SV=1	128.77	2	7	4.6	46.32	1	7	3.8	87.85	2	3	1.6					40.26	1	4	2.9					1	4	5	3.33333
Q5NC82	Nucleoside diphosphate kinase OS=Mus musculus GN=Nme2 PE=1 SV=1									74.1	2	4	30.9					41.4	1	3	20.4					1	5	4	3.33333
Q9D0F1	Kinetochore protein NDC80 homolog OS=Mus musculus GN=Ndc80 PE=1 SV=1									111.02	3	7	15.6													1	8	1	3.33333
Q9EQJ9	Membrane-associated guanylate kinase, WW and PDZ domain-containing protein 3 OS=Mus musculus GN=Magi3 PE=1 SV=2									108.95	3	7	6													1	8	1	3.33333
Q3UMY5	Echinoderm microtubule-associated protein-like 4 OS=Mus musculus GN=Eml4 PE=1 SV=1									34.12	1	5	5.7					72.14	2	2	2.3					1	6	3	3.33333
Q5SV02	DNA repair protein RAD50 OS=Mus musculus GN=Rad50 PE=1 SV=1	94.82	2	7	10.4																					8	1	1	3.33333
D3YX34	Dynactin subunit 1 OS=Mus musculus GN=Dctn1 PE=1 SV=1									48.5	1	4	7.4					44.76	1	3	3.6					1	5	4	3.33333
Q8VHM5	Heterogeneous nuclear ribonucleoprotein R OS=Mus musculus GN=Hnrnpr PE=1 SV=1	262.56	5	8	14.6	216.01	4	8	15.5	271.57	6	7	11.4													1	8	1	3.33333
Q6NXH9	Keratin, type II cytoskeletal 73 OS=Mus musculus GN=Krt73 PE=1 SV=1	185.28	3	5	10	197.61	3	5	11.7	176.07	3	4	10.6					118.81	2	3	5.8					1	5	4	3.33333
Q8VHE0	Translocation protein SEC63 homolog OS=Mus musculus GN=Sec63 PE=1 SV=4					41.82	1	1	3.3	45.68	1	7	10.9					91.75	2	5	8.9	34.61	1	3	5.3	0.5	8	1.5	3.33333
Q9QYB5	Gamma-adducin OS=Mus musculus GN=Add3 PE=1 SV=2	245.96	5	6	7.2	201.48	4	6	9.8	87.19	2	6	12.7					66.74	2	5	6.4	70.89	2	2	2.5	1	7	2	3.33333
B1AQ78	Keratin 19 OS=Mus musculus GN=Krt19 PE=1 SV=1	258.32	5	5	12.9	146.42	3	4	7.9	246.79	6	7	15.1					217.4	6	6	14.9	187.97	5	8	17.6	1.2	8	0.777778	3.32593
P70288	Histone deacetylase 2 OS=Mus musculus GN=Hdac2 PE=1 SV=1	99.8	2	5	12.5	58.04	1	3	8.2	116.68	3	6	14.1					133.97	3	3	8	33.4	1	2	5.5	1.5	7	1.33333	3.27778
F6YJC6	Serine/threonine-protein phosphatase PGAM5, mitochondrial (Fragment) OS=Mus musculus GN=Pgam5 PE=1 SV=1	156.83	3	4	50	267.82	5	5	56	346.18	7	7	74.1													0.833333	8	1	3.27778
E0CXB9	Catenin alpha-2 OS=Mus musculus GN=Ctnna2 PE=1 SV=1	161.42	3	4	7.6					54.91	1	2	4.7					189.2	4	6	8.4	71.68	2	3	5	5	3	1.75	3.25
Q3TTW5	Pumilio homolog 1 OS=Mus musculus GN=Pum1 PE=1 SV=1	45.76	1	3	4.9					38.31	1	4	4.4					37.89	1	2	3.6	29.34	1	3	3.8	4	5	0.75	3.25
Q9DCV7	Keratin, type II cytoskeletal 7 OS=Mus musculus GN=Krt7 PE=1 SV=1	177.61	4	8	14	162.62	3	3	5.9	117.61	2	4	9.4					116.87	3	4	9.8	34.52	1	1	3.1	2.25	5	2.5	3.25
Q91V89	Protein Ppp2r5d OS=Mus musculus GN=Ppp2r5d PE=1 SV=1	51.37	1	2	5.2					92.99	2	5	10.1					139.25	3	4	9.3	74.09	2	6	10.9	3	6	0.714286	3.2381
O35382	Exocyst complex component 4 OS=Mus musculus GN=Exoc4 PE=1 SV=2	64.12	1	1	3.2	81.65	1	3	4.4	207.31	4	7	11.2					183.83	5	6	8.5	85.72	2	5	8.4	0.5	8	1.16667	3.22222
Q9D0D4	Probable dimethyladenosine transferase OS=Mus musculus GN=Dimt1 PE=2 SV=1	175.49	3	5	21.4					212.15	4	7	27.2	79.33	2	4	23.3	107.44	3	3	12.1	41.28	1	1	3.5	6	1.6	2	3.2
A2AIM4	Tropomyosin beta chain OS=Mus musculus GN=Tpm2 PE=1 SV=1	273.24	5	8	24.3									907.15	14	17	41.5	350.78	7	7	22.2	688.74	11	14	27.5	9	0.0555556	0.533333	3.1963
Q6PAJ1	Breakpoint cluster region protein OS=Mus musculus GN=Bcr PE=1 SV=3									156.58	3	6	7.2					331.43	8	13	13.3	215.98	4	8	7.5	1	7	1.55556	3.18519
Q5SVQ0	Histone acetyltransferase KAT7 OS=Mus musculus GN=Kat7 PE=1 SV=1					77.5	1	1	2.8	190.6	3	3	7.7					139.99	3	4	9.1					0.5	4	5	3.16667
F6Q5Z1	Integrin-linked protein kinase (Fragment) OS=Mus musculus GN=Ilk PE=1 SV=1									219.28	5	6	32.1					161.37	4	5	27.1	112.56	3	3	15.6	1	7	1.5	3.16667
P97377	Cyclin-dependent kinase 2 OS=Mus musculus GN=Cdk2 PE=1 SV=2	198.21	4	5	21.1					461.45	9	12	38.7	203.83	4	5	17.9	381.79	8	11	35	263.81	6	8	28.6	6	2.16667	1.33333	3.16667
Q3TMX0	MCG4375, isoform CRA_b OS=Mus musculus GN=Sdcbp PE=1 SV=1	184.96	4	9	24.8	174.2	3	6	21.1	142.23	3	4	22.8					183.09	4	5	28.2	62.42	1	1	9.1	1.42857	5	3	3.14286
Q8BVY0	Ribosomal L1 domain-containing protein 1 OS=Mus musculus GN=Rsl1d1 PE=1 SV=1	105.33	2	6	17.5					290.23	4	5	16.4	264.51	5	6	20.4	380.45	6	10	21.9	224.11	4	6	19.9	7	0.857143	1.57143	3.14286
Q4KML7	Ezrin OS=Mus musculus GN=Ezr PE=1 SV=1	912.81	17	25	36.7	426.97	7	14	20.6	848.59	16	26	28.5	279.76	6	6	11.1	586.89	13	18	24.2	140.41	4	4	8.4	1.73333	3.85714	3.8	3.13016
Q80XU2	Tyrosine-protein kinase OS=Mus musculus GN=Src PE=1 SV=1	133.35	3	3	7.1	39.32	1	2	4.7									215.77	4	6	13.1					1.33333	1	7	3.11111
Q9D2N4	Dystrobrevin alpha OS=Mus musculus GN=Dtna PE=1 SV=2	113.13	2	4	8.3									28.78	1	2	2.4	104.02	3	3	6.3					5	0.333333	4	3.11111
Q3TQ29	Pumilio homolog 2 OS=Mus musculus GN=Pum2 PE=1 SV=1	112.33	2	7	8.5	39.46	1	4	4.3	122.13	3	6	7.4					150.69	4	4	6	87.95	3	6	6	1.6	7	0.714286	3.10476
Q6ZPF4	Formin-like protein 3 OS=Mus musculus GN=Fmnl3 PE=1 SV=2	180.1	4	6	7.2					239.26	6	10	12.7	274.24	5	9	11.6	311.89	8	11	13.3	285.65	7	9	10.6	7	1.1	1.2	3.1
E9QN31	Probable 28S rRNA (cytosine-C(5))-methyltransferase OS=Mus musculus GN=Nop2 PE=1 SV=1	165.09	3	4	7.7					195.59	4	6	8.8	52.56	1	1	2.9	114.53	3	5	8.9	197.15	3	7	11.1	5	3.5	0.75	3.08333
Q9DC23	DnaJ homolog subfamily C member 10 OS=Mus musculus GN=Dnajc10 PE=1 SV=2	151.5	3	5	8.8	205.95	4	7	10.2	177.35	5	8	12.2	71.83	2	5	7.7	104.2	3	6	9.5					0.75	1.5	7	3.08333
Q8CGC4	Protein LSM14 homolog B OS=Mus musculus GN=Lsm14b PE=1 SV=3	67.05	1	3	8.6					181.49	3	3	19.2					238.51	5	5	17.9	33.02	1	4	22.6	4	4	1.2	3.06667
Q3UKJ7	WD40 repeat-containing protein SMU1 OS=Mus musculus GN=Smu1 PE=2 SV=2	284.52	5	10	20.9	132.39	3	4	11.7	74.02	2	2	7.2					32.22	1	3	6.6					2.2	3	4	3.06667
A2A701	Eukaryotic translation initiation factor 3 subunit M (Fragment) OS=Mus musculus GN=Eif3m PE=1 SV=1					162.44	3	4	31.5	245.34	5	7	44.1													0.2	8	1	3.06667
D3YYI8	Histone deacetylase OS=Mus musculus GN=Gm10093 PE=3 SV=1	139.66	3	6	14.7	101.54	2	4	14.3	178.43	5	7	17.4	87.84	2	2	7.7	168	4	4	11.4					1.4	2.66667	5	3.02222
E9PX54	Putative RNA-binding protein Luc7-like 2 OS=Mus musculus GN=Luc7l2 PE=1 SV=1	377.7	6	6	23.4																					7	1	1	3
E9Q4P0	KxDL motif-containing protein 1 (Fragment) OS=Mus musculus GN=Kxd1 PE=1 SV=1	322.7	5	6	28																					7	1	1	3
A0A087WSF5	Leucine-rich repeat flightless-interacting protein 1 (Fragment) OS=Mus musculus GN=Lrrfip1 PE=1 SV=1									249.46	4	6	29.7													1	7	1	3
Q8CHY7	Tetratricopeptide repeat protein 23 OS=Mus musculus GN=Ttc23 PE=2 SV=1	245.45	4	6	19.1																					7	1	1	3
Q545K5	MCG116386, isoform CRA_a OS=Mus musculus GN=Rbm3 PE=1 SV=1	241.44	4	6	42.5																					7	1	1	3
D3Z4V2	Pre-mRNA 3~-end-processing factor FIP1 OS=Mus musculus GN=Fip1l1 PE=1 SV=1									222	5	6	14.3													1	7	1	3
Q6PDQ2	Chromodomain-helicase-DNA-binding protein 4 OS=Mus musculus GN=Chd4 PE=1 SV=1	212.81	4	6	6.8																					7	1	1	3
A0A0J9YTV5	Recombining binding protein suppressor of hairless (Drosophila), isoform CRA_b OS=Mus musculus GN=Rbpj PE=1 SV=1	176.95	4	4	12.2					114.22	3	3	7.5	29.25	1	1	2.2	29.93	1	1	2.2					5	2	2	3
Q3TSG4	RNA demethylase ALKBH5 OS=Mus musculus GN=Alkbh5 PE=1 SV=2									113.1	3	4	12.2					70.77	1	2	10.4					1	5	3	3
Q8C156	Condensin complex subunit 2 OS=Mus musculus GN=Ncaph PE=1 SV=1	63.93	1	2	2.9					27.58	1	1	2.3					89.32	2	3	5.5					3	2	4	3
F6ZKZ3	Sulfide:quinone oxidoreductase, mitochondrial OS=Mus musculus GN=Sqrdl PE=1 SV=1																	177.36	4	6	23					1	1	7	3
F6QFT1	Protein LYRIC (Fragment) OS=Mus musculus GN=Mtdh PE=1 SV=6	174.51	3	6	20.9																					7	1	1	3
A0A0J9YUG2	Serine/threonine-protein phosphatase PP1-beta catalytic subunit OS=Mus musculus GN=Ppp1cb PE=1 SV=1	173.76	2	6	72.9																					7	1	1	3
Q9Z1N5	Spliceosome RNA helicase Ddx39b OS=Mus musculus GN=Ddx39b PE=1 SV=1	36.57	1	2	8.4					56.75	1	2	5.8					72.68	1	2	8.4					3	3	3	3
Q8C0V0	Serine/threonine-protein kinase tousled-like 1 OS=Mus musculus GN=Tlk1 PE=1 SV=2									30.55	1	3	7.2					133.49	3	3	6.7					1	4	4	3
P39688	Tyrosine-protein kinase Fyn OS=Mus musculus GN=Fyn PE=1 SV=4	149.25	3	3	9.9	90.94	2	3	8.9									295.66	6	6	9.7					1	1	7	3
P31324	cAMP-dependent protein kinase type II-beta regulatory subunit OS=Mus musculus GN=Prkar2b PE=1 SV=3	47.03	1	2	5.3					97.93	2	4	15.9													3	5	1	3
D3YYD2	Protein FAM111A OS=Mus musculus GN=Fam111a PE=1 SV=1	80.13	1	2	8.8					28.61	1	2	4					36.18	1	2	4					3	3	3	3
F7C545	Protein Ankhd1 (Fragment) OS=Mus musculus GN=Ankhd1 PE=1 SV=1	128.77	2	6	30.8																					7	1	1	3
Q9D8U0	Interferon-related developmental regulator 2 OS=Mus musculus GN=Ifrd2 PE=1 SV=1									79.91	2	4	12.5					44.34	1	2	6.6					1	5	3	3
Q922H4	Mannose-1-phosphate guanyltransferase alpha OS=Mus musculus GN=Gmppa PE=1 SV=1									75.58	2	3	12.9					33.95	1	3	12.1					1	4	4	3
Q9DC69	NADH dehydrogenase [ubiquinone] 1 alpha subcomplex subunit 9, mitochondrial OS=Mus musculus GN=Ndufa9 PE=1 SV=2									68.98	2	3	11.4					33.57	1	3	11.4					1	4	4	3
Q3U6N9	UPF0488 protein C8orf33 homolog OS=Mus musculus PE=2 SV=1	87.27	2	2	9.9	55.61	1	2	9.9	92.24	3	4	20.3					38.52	1	2	9.9					1	5	3	3
Q9QY76	Vesicle-associated membrane protein-associated protein B OS=Mus musculus GN=Vapb PE=1 SV=3	88.14	1	6	22.6																					7	1	1	3
Q80U72	Protein scribble homolog OS=Mus musculus GN=Scrib PE=1 SV=2	170.17	3	4	4.9	65.8	1	4	4.4									58.13	2	6	5					1	1	7	3
Q8VCX5	Calcium uptake protein 1, mitochondrial OS=Mus musculus GN=Micu1 PE=1 SV=1	53.06	1	4	13													27.22	1	2	4.2					5	1	3	3
D3YYN8	Non-specific serine/threonine protein kinase OS=Mus musculus GN=Cdc42bpa PE=1 SV=1	42.86	1	2	3													32.47	1	4	4.3					3	1	5	3
E9PWF0	Thrombospondin-3 OS=Mus musculus GN=Thbs3 PE=1 SV=1	42.74	1	4	3.3					29.61	1	2	2.4													5	3	1	3
Q9D1Q6	Endoplasmic reticulum resident protein 44 OS=Mus musculus GN=Erp44 PE=1 SV=1									39.68	1	4	14					108.56	3	5	16.5	43.6	1	1	1.7	1	5	3	3
Q8K4Z5	Splicing factor 3A subunit 1 OS=Mus musculus GN=Sf3a1 PE=1 SV=1	39.98	1	6	10.6																					7	1	1	3
Q8CJ27	Abnormal spindle-like microcephaly-associated protein homolog OS=Mus musculus GN=Aspm PE=2 SV=2	39.8	1	6	3.3																					7	1	1	3
Q8JZM7	Parafibromin OS=Mus musculus GN=Cdc73 PE=1 SV=1									103.99	3	6	12.1					33.72	1	3	7.7	81.63	2	3	7.7	1	7	1	3
Q61127	NGFI-A-binding protein 2 OS=Mus musculus GN=Nab2 PE=1 SV=2	45.9	1	6	17.7					268.62	7	8	22.1	186.39	4	8	20.8	342.05	7	11	24.4	499.47	11	11	26.3	7	1	1	3
G3UZ44	Paired mesoderm homeobox protein 1 OS=Mus musculus GN=Prrx1 PE=1 SV=1	236.65	4	6	40					211.28	5	6	36	182.9	3	4	18	108.02	2	2	13	201.74	3	5	30	7	1.4	0.5	2.96667
Q9R1X4	Protein timeless homolog OS=Mus musculus GN=Timeless PE=1 SV=3	205.78	4	6	8.4					97.64	3	6	7.4	185.1	4	4	6.4	148.95	4	4	7.5	339.15	7	10	12.3	7	1.4	0.454545	2.95152
P97473	RISC-loading complex subunit TARBP2 OS=Mus musculus GN=Tarbp2 PE=1 SV=2	75.07	1	2	7.4					132.8	2	4	17.3					105.36	2	3	13.7	117.34	2	4	17.5	3	5	0.8	2.93333
Q8CG46	Structural maintenance of chromosomes protein 5 OS=Mus musculus GN=Smc5 PE=1 SV=1	85.25	2	6	10.9	77.63	2	3	7.3	83.06	2	2	1.6					93.25	2	3	3.6					1.75	3	4	2.91667
F8WJE0	Deoxynucleoside triphosphate triphosphohydrolase SAMHD1 OS=Mus musculus GN=Samhd1 PE=1 SV=1									73.13	2	4	8.7	28.27	1	6	10.9	142.41	3	6	11.9					1	0.714286	7	2.90476
Q91VN6	Probable ATP-dependent RNA helicase DDX41 OS=Mus musculus GN=Ddx41 PE=1 SV=2	35.33	1	4	9.3					178.98	3	5	11.4	47.37	1	4	8.5	106.45	3	4	8.2	30.31	1	1	4.5	5	1.2	2.5	2.9
F6YD01	Pumilio homolog 2 (Fragment) OS=Mus musculus GN=Pum2 PE=1 SV=1	112.33	2	4	21.6	39.46	1	2	15.3	83.82	2	3	23					77.52	2	2	19.4					1.66667	4	3	2.88889
Q8K2Y9	Cerebral cavernous malformations protein 2 homolog OS=Mus musculus GN=Ccm2 PE=1 SV=1	37.54	1	2	5.7					58.78	1	3	8.8					118.82	2	4	8.8	51.75	1	2	5.7	3	4	1.66667	2.88889
Q3UMG6	Non-metastatic cells 7, protein expressed in, isoform CRA_c OS=Mus musculus GN=Nme7 PE=1 SV=1	149.78	3	7	20.3	142.12	3	5	13.7	134.9	3	5	14.4					64.77	1	3	9.4	79.68	2	2	5.1	1.33333	6	1.33333	2.88889
F8WI35	Histone H3 OS=Mus musculus GN=H3f3a PE=3 SV=1	217.45	5	6	36.3					188.71	4	4	28.9	190.21	4	5	28.9	135.12	3	4	28.9	211.04	4	5	28.9	7	0.833333	0.833333	2.88889
Q91ZW3	SWI/SNF-related matrix-associated actin-dependent regulator of chromatin subfamily A member 5 OS=Mus musculus GN=Smarca5 PE=1 SV=1	159.16	3	13	13.3	39.68	1	8	9.2	68.44	2	3	4					30.48	1	5	6.8	31.57	1	1	3.6	1.55556	4	3	2.85185
A0A0A6YX73	cAMP-dependent protein kinase type II-alpha regulatory subunit OS=Mus musculus GN=Prkar2a PE=1 SV=1									127.77	3	5	18.2					51.9	1	2	6.1	42.35	1	1	2.9	1	6	1.5	2.83333
G3UY65	G2/mitotic-specific cyclin-B1 OS=Mus musculus GN=Ccnb1 PE=1 SV=1									47.78	1	4	18.1					112.43	3	4	8.4	42.49	1	1	2.8	1	5	2.5	2.83333
Q80X85	28S ribosomal protein S7, mitochondrial OS=Mus musculus GN=Mrps7 PE=1 SV=1					40.21	1	1	5.4	81.31	2	4	20.7					36.66	1	2	15.3					0.5	5	3	2.83333
Q924W5	Structural maintenance of chromosomes protein 6 OS=Mus musculus GN=Smc6 PE=1 SV=1	65.22	1	4	7.9	48.31	1	1	3.7	49.16	1	4	7.2					49.68	1	3	4	49.39	1	3	3.6	2.5	5	1	2.83333
A0A0A0MQ76	Nucleolar protein 58 OS=Mus musculus GN=Nop58 PE=1 SV=1	96.57	2	5	13.7	43.74	1	4	12.8	224.35	3	5	18	110.16	3	4	12.8	283.6	4	5	17.3					1.2	1.2	6	2.8
Q6ZQ08	CCR4-NOT transcription complex subunit 1 OS=Mus musculus GN=Cnot1 PE=1 SV=2	484.21	10	17	7.7	497.7	10	19	8.8	68.77	2	4	2.4					65.42	2	9	4.7	55.74	2	3	1.9	0.9	5	2.5	2.8
Q7TT50	Serine/threonine-protein kinase MRCK beta OS=Mus musculus GN=Cdc42bpb PE=1 SV=2	373.4	8	15	9.6	277.13	5	15	10.4	37.24	1	2	3.3	71.37	2	7	9	32.47	1	6	5					1	0.375	7	2.79167
Q78HU3	Multivesicular body subunit 12A OS=Mus musculus GN=Mvb12a PE=1 SV=1	41.05	1	3	11.8	43.31	1	2	10.7	172.01	3	3	10.7					70.8	2	2	13.3					1.33333	4	3	2.77778
A0A0A6YVV8	Muscleblind-like protein 1 OS=Mus musculus GN=Mbnl1 PE=1 SV=1	35.34	1	3	7.2	52.85	1	2	6.5	96.7	3	4	9.3					32.27	1	1	2.1					1.33333	5	2	2.77778
F6RJV6	LanC-like protein 2 (Fragment) OS=Mus musculus GN=Lancl2 PE=1 SV=1	41.14	1	4	17.9	40.44	1	3	9.1	79.68	2	3	11.1					48.75	1	2	9.5					1.25	4	3	2.75
Q9JMK2	Casein kinase I isoform epsilon OS=Mus musculus GN=Csnk1e PE=1 SV=2									183.27	3	5	14.9					115.66	2	4	13.2	133.51	3	3	9.1	1	6	1.25	2.75
G3X914	Cullin 5 OS=Mus musculus GN=Cul5 PE=1 SV=1									27.47	1	5	8.8					57.98	2	4	5.3	64.65	2	3	4.2	1	6	1.25	2.75
E0CY98	Traf2 and NCK-interacting protein kinase OS=Mus musculus GN=Tnik PE=1 SV=1	113.03	3	6	6.3																	131.69	3	4	4	7	1	0.2	2.73333
Q3TRJ7	Endophilin-A2 OS=Mus musculus GN=Sh3gl1 PE=1 SV=1	45.67	1	5	13.6					263.64	5	6	13.3	257.04	6	8	24.5	252.17	5	11	29.6	224.15	5	8	22	6	0.777778	1.33333	2.7037
F8VPK0	Protein Ttc37 OS=Mus musculus GN=Ttc37 PE=1 SV=1	93.85	2	4	4.1					170.02	4	10	8.3	149.17	3	5	4.5	190.11	5	9	7.8	174.42	4	7	6.5	5	1.83333	1.25	2.69444
B1AZ14	Cordon-bleu protein-like 1 OS=Mus musculus GN=Cobll1 PE=1 SV=1	71.04	1	4	5.4	61.59	1	2	4	227.38	5	6	6.4	135.31	4	4	5.1	30	1	4	3.9					1.66667	1.4	5	2.68889
Q9QXS1	Plectin OS=Mus musculus GN=Plec PE=1 SV=3					2076.77	41	81	18.8									91.94	2	6	3.7					0.0121951	1	7	2.67073
E9Q7G6	RNA-binding motif, single-stranded-interacting protein 2 OS=Mus musculus GN=Rbms2 PE=1 SV=1									347.76	4	5	22													1	6	1	2.66667
F6SSI5	Protein Gm4877 OS=Mus musculus GN=Gm4877 PE=4 SV=1									286.62	3	5	13.8													1	6	1	2.66667
F7AI47	Serine/arginine-rich-splicing factor 1 (Fragment) OS=Mus musculus GN=Srsf1 PE=1 SV=1									209.46	4	5	62.3													1	6	1	2.66667
B8JK87	Angiomotin-like protein 2 OS=Mus musculus GN=Amotl2 PE=1 SV=1	36.02	1	2	7.1					168.81	3	3	6.3													3	4	1	2.66667
Q3TTV6	Tuftelin-interacting protein 11 OS=Mus musculus GN=Tfip11 PE=1 SV=1	113.59	2	3	4.9					82.39	2	2	4.5													4	3	1	2.66667
A2AGL5	Apoptosis, caspase activation inhibitor, isoform CRA_c OS=Mus musculus GN=Aven PE=1 SV=1									187.75	4	5	28.6													1	6	1	2.66667
A2A8V8	Serine/arginine repetitive matrix protein 1 OS=Mus musculus GN=Srrm1 PE=1 SV=1									187.47	4	5	7.3													1	6	1	2.66667
Q8BH97	Reticulocalbin-3 OS=Mus musculus GN=Rcn3 PE=1 SV=1									184.92	4	5	24.4													1	6	1	2.66667
O35671	Integrin beta-1-binding protein 1 OS=Mus musculus GN=Itgb1bp1 PE=1 SV=1									141.66	3	3	19.5					41.81	1	2	14					1	4	3	2.66667
F6WIM8	Collagen alpha-1(XII) chain (Fragment) OS=Mus musculus GN=Col12a1 PE=1 SV=1	181.64	3	5	28																					6	1	1	2.66667
Q3TFK5	G patch domain-containing protein 4 OS=Mus musculus GN=Gpatch4 PE=1 SV=1									142.52	3	3	8.2					35.1	1	2	5.8					1	4	3	2.66667
F7B5B5	Protein Hnrnpr OS=Mus musculus GN=Hnrnpr PE=1 SV=1																	174.85	3	5	11.3					1	1	6	2.66667
Q3USZ8	Deleted in autism protein 1 homolog OS=Mus musculus PE=1 SV=2									137.31	3	4	13.7					29.65	1	1	1.9					1	5	2	2.66667
Q8VDW0	ATP-dependent RNA helicase DDX39A OS=Mus musculus GN=Ddx39a PE=1 SV=1	36.57	1	2	10.1					56.75	1	2	5.6					72.68	1	1	5.6					3	3	2	2.66667
Q9JK83	Partitioning defective 6 homolog beta OS=Mus musculus GN=Pard6b PE=1 SV=2									125.12	3	4	12.4					40.67	1	1	2.7					1	5	2	2.66667
A0A087WPP8	Abl interactor 2 OS=Mus musculus GN=Abi2 PE=1 SV=1									104.81	2	2	6.1					54.74	1	3	8.6					1	3	4	2.66667
A3KGG8	Small kinetochore-associated protein OS=Mus musculus GN=Knstrn PE=1 SV=1									113.15	2	3	15.8					40.17	1	2	10.3					1	4	3	2.66667
F6XAI7	EF-hand calcium-binding domain-containing protein 7 OS=Mus musculus GN=Efcab7 PE=4 SV=2																	153.21	3	5	12.5					1	1	6	2.66667
Q8BP00	IQ calmodulin-binding motif-containing protein 1 OS=Mus musculus GN=Iqcb1 PE=1 SV=2									119.75	3	4	7.7					30.57	1	1	3					1	5	2	2.66667
J3QPS8	Eukaryotic translation initiation factor 5A-1 OS=Mus musculus GN=Eif5a PE=1 SV=1									158.87	3	4	63.2					81.42	2	3	32.9	30.44	1	1	26.3	1	5	2	2.66667
Q9EP69	Phosphatidylinositide phosphatase SAC1 OS=Mus musculus GN=Sacm1l PE=1 SV=1									52.95	1	2	3.2					86.31	2	3	4.6					1	3	4	2.66667
G3UVU6	Protein Gm20517 OS=Mus musculus GN=Gm20517 PE=4 SV=1	84.2	2	4	26.3					52.27	1	1	7.2													5	2	1	2.66667
Q3UH60	Disco-interacting protein 2 homolog B OS=Mus musculus GN=Dip2b PE=1 SV=1									130.57	4	5	3.6													1	6	1	2.66667
Q8BPP1	Protein mab-21-like 2 OS=Mus musculus GN=Mab21l2 PE=2 SV=1	130.2	2	5	21.7																					6	1	1	2.66667
A6PWY4	WD repeat-containing protein 76 OS=Mus musculus GN=Wdr76 PE=1 SV=1	45.09	1	3	6.6					52.39	1	1	5.1					27.44	1	1	3.7					4	2	2	2.66667
Q8BHX1	HAUS augmin-like complex subunit 1 OS=Mus musculus GN=Haus1 PE=1 SV=2									82.37	2	4	17.6					40.25	1	1	4					1	5	2	2.66667
Q9ES70	Serine/threonine-protein kinase Nek6 OS=Mus musculus GN=Nek6 PE=1 SV=1									41.6	1	2	5.1					79.35	2	3	11.5					1	3	4	2.66667
Q9DB40	Mediator of RNA polymerase II transcription subunit 27 OS=Mus musculus GN=Med27 PE=2 SV=2									117.62	3	5	22.5													1	6	1	2.66667
Q8BP43	Tropomyosin 1, alpha, isoform CRA_c OS=Mus musculus GN=Tpm1 PE=1 SV=1									117.16	2	5	27.8													1	6	1	2.66667
Q8C6B9	Active regulator of SIRT1 OS=Mus musculus GN=Rps19bp1 PE=1 SV=1									83.95	2	2	27.3					31.37	1	3	14.7					1	3	4	2.66667
A8DIL0	Galectin OS=Mus musculus GN=Lgals8 PE=1 SV=1									111.47	3	5	19.1													1	6	1	2.66667
Q9ESX5	H/ACA ribonucleoprotein complex subunit 4 OS=Mus musculus GN=Dkc1 PE=1 SV=4									109.43	3	5	13													1	6	1	2.66667
A2ALU4	Protein Shroom2 OS=Mus musculus GN=Shroom2 PE=1 SV=1	105.83	2	5	6.6																					6	1	1	2.66667
Q80TF6	StAR-related lipid transfer protein 9 OS=Mus musculus GN=Stard9 PE=1 SV=2									50.02	1	2	1					52.13	1	3	0.9					1	3	4	2.66667
P63005	Platelet-activating factor acetylhydrolase IB subunit alpha OS=Mus musculus GN=Pafah1b1 PE=1 SV=2									36.35	1	3	9.5					61.87	2	2	6.8					1	4	3	2.66667
Q9DC28	Casein kinase I isoform delta OS=Mus musculus GN=Csnk1d PE=1 SV=2	124.7	2	5	14.2	56.46	1	3	8.7	161.97	3	4	11.8					201.23	3	5	15.7	105.84	3	3	9.4	1.5	5	1.5	2.66667
Q8R5L3	Vam6/Vps39-like protein OS=Mus musculus GN=Vps39 PE=1 SV=1									35.33	1	4	6.3					59.17	1	1	4					1	5	2	2.66667
Q8CI33	CWF19-like protein 1 OS=Mus musculus GN=Cwf19l1 PE=1 SV=2									59.35	2	3	8.4					29.33	1	2	7.1					1	4	3	2.66667
Q8BSS9	Liprin-alpha-2 OS=Mus musculus GN=Ppfia2 PE=1 SV=2	45.8	1	4	6.8	80.07	2	4	6.4	220.76	5	5	7.7													1	6	1	2.66667
P28271	Cytoplasmic aconitate hydratase OS=Mus musculus GN=Aco1 PE=1 SV=3									39.55	1	3	5.8					43.28	1	2	3.3					1	4	3	2.66667
Q9CQS9	HAUS augmin-like complex subunit 2 OS=Mus musculus GN=Haus2 PE=2 SV=1									35.58	1	4	24.4					42.15	1	1	4.3					1	5	2	2.66667
Q8BGT7	Survival of motor neuron-related-splicing factor 30 OS=Mus musculus GN=Smndc1 PE=1 SV=1	100.93	2	2	18.1					59.25	2	3	18.1	93.93	2	3	29.4	119.46	3	3	18.1					3	1	4	2.66667
F6VG99	Protein Lmo7 (Fragment) OS=Mus musculus GN=Lmo7 PE=1 SV=1									75.89	2	5	6.5													1	6	1	2.66667
Q9D6T0	Nitric oxide synthase-interacting protein OS=Mus musculus GN=Nosip PE=1 SV=1									30.9	1	2	12.3					43.7	1	3	11.3					1	3	4	2.66667
E9Q7L0	Protein Ogdhl OS=Mus musculus GN=Ogdhl PE=1 SV=1	45.4	1	2	2													27.31	1	3	2.6					3	1	4	2.66667
Q9CQT2	RNA-binding protein 7 OS=Mus musculus GN=Rbm7 PE=1 SV=1									67.73	2	5	20.8													1	6	1	2.66667
Q3UG16	AP-1 complex subunit mu-1 OS=Mus musculus GN=Ap1m1 PE=1 SV=1									30.67	1	3	7.3					36.86	1	2	10.4					1	4	3	2.66667
A2ABV5	Mediator of RNA polymerase II transcription subunit 14 OS=Mus musculus GN=Med14 PE=1 SV=1	64.85	1	5	4.2																					6	1	1	2.66667
Q1HFZ0	tRNA (cytosine(34)-C(5))-methyltransferase OS=Mus musculus GN=Nsun2 PE=1 SV=2	35.16	1	2	3					28.14	1	3	7.1													3	4	1	2.66667
A0A0G2JDE8	Anaphase-promoting complex subunit 5 OS=Mus musculus GN=Anapc5 PE=1 SV=1									49.44	1	5	8.8													1	6	1	2.66667
B7ZC27	Pre-mRNA-processing-splicing factor 8 (Fragment) OS=Mus musculus GN=Prpf8 PE=1 SV=1	44.1	1	5	7																					6	1	1	2.66667
Q91VM5	RNA binding motif protein, X-linked-like-1 OS=Mus musculus GN=Rbmxl1 PE=2 SV=1	288.22	5	7	17.8	228.46	4	7	18.3									99	2	5	15.7					1	1	6	2.66667
Q99ME9	Nucleolar GTP-binding protein 1 OS=Mus musculus GN=Gtpbp4 PE=1 SV=3	43.61	1	3	5.5	47.3	1	1	4.9	35.67	1	3	5.8					29.2	1	1	3.5					2	4	2	2.66667
Q8R3L2	Transcription factor 25 OS=Mus musculus GN=Tcf25 PE=1 SV=2									110.93	3	5	12.7	94.44	2	2	5.2	66.21	2	4	10.7					1	2	5	2.66667
A0A087WSU4	NGFI-A-binding protein 1 OS=Mus musculus GN=Nab1 PE=1 SV=1									33.05	1	5	16.3													1	6	1	2.66667
H7BWY2	AP-3 complex subunit mu-1 OS=Mus musculus GN=Ap3m1 PE=1 SV=1	101.57	2	5	14.3					352.15	8	8	28.6	159.16	3	4	13.5					175.57	3	4	18.4	6	1.8	0.2	2.66667
Q8K1A6	Coiled-coil and C2 domain-containing protein 1A OS=Mus musculus GN=Cc2d1a PE=1 SV=2									99.63	3	5	6.6					93.4	3	6	9.1	158.42	4	6	8.8	1	6	1	2.66667
A2AMI2	Eukaryotic translation initiation factor 4 gamma 3 OS=Mus musculus GN=Eif4g3 PE=1 SV=1	197.22	4	7	8.2	292.45	5	7	5.6	68.35	2	3	2.1					40.06	1	2	2.7					1	4	3	2.66667
Q3UDD3	Polymerase delta-interacting protein 3 OS=Mus musculus GN=Poldip3 PE=1 SV=1	209.17	4	6	27.4					457.12	7	10	36.6	365.92	6	11	26.9					552.47	10	11	33.8	7	0.916667	0.0833333	2.66667
Q6NXL3	Ebf3 protein OS=Mus musculus GN=Ebf3 PE=1 SV=1	285.51	5	5	9	145.35	2	4	8.5	166.92	3	5	8.7					138.13	2	2	5.1	129.7	2	3	5.8	1.2	6	0.75	2.65
Q3TVI5	Collagen alpha-1(III) chain OS=Mus musculus GN=Col3a1 PE=1 SV=1	1923.46	29	39	39.1	1553.92	22	33	33.8	592.58	11	14	17.9	105.79	3	3	2.9	211.7	5	8	7.8	63.74	1	2	2	1.17647	3.75	3	2.64216
Q8BKN5	Gamma-tubulin complex component 5 OS=Mus musculus GN=Tubgcp5 PE=2 SV=2	236.69	4	6	8.9	92.26	2	7	7.6	119.41	3	5	7													0.875	6	1	2.625
Q99LJ7	RCC1 and BTB domain-containing protein 2 OS=Mus musculus GN=Rcbtb2 PE=2 SV=1	119.16	2	5	14.9													231.99	6	6	13.8	283.73	5	7	16.5	6	1	0.875	2.625
F6QA74	DNA-(apurinic or apyrimidinic site) lyase (Fragment) OS=Mus musculus GN=Apex1 PE=1 SV=1									221.46	5	5	19.4	101.16	3	6	21.1	87.24	2	5	18.7					1	0.857143	6	2.61905
Q9Z1M8	Protein Red OS=Mus musculus GN=Ik PE=1 SV=2	81.3	2	5	12.2	87.41	2	6	16.7	71.96	2	2	6.3					53.76	1	3	6.3					0.857143	3	4	2.61905
B7ZCU0	Abl interactor 1 OS=Mus musculus GN=Abi1 PE=1 SV=1	152.63	3	5	9.4					333.76	6	7	14.2	187.7	4	4	10.8					113.59	2	3	7.5	6	1.6	0.25	2.61667
Q3U8S0	AP-3 complex subunit sigma-1 OS=Mus musculus GN=Ap3s1 PE=1 SV=1	106.55	2	3	18.1					211.95	6	6	28	115.4	3	5	28.5	174.52	4	7	27.5	35.22	1	2	12.4	4	1.16667	2.66667	2.61111
Q8CBY8	Dynactin subunit 4 OS=Mus musculus GN=Dctn4 PE=1 SV=1	132.42	3	3	9.4					477.2	9	9	24.8	138.28	2	3	8.4	474.4	8	8	24.2	278.3	5	6	16.3	4	2.5	1.28571	2.59524
Q9Z0U1	Tight junction protein ZO-2 OS=Mus musculus GN=Tjp2 PE=1 SV=2	1292.32	23	42	34.7	550.12	9	17	16.6	1374.33	26	43	41.6	337.65	7	12	16.3	1425.57	31	43	41	732.72	14	21	20.2	2.38889	3.38462	2	2.59117
Q3U4H0	Microtubule-associated protein RP/EB family member 1 OS=Mus musculus GN=Mapre1 PE=1 SV=1	50.71	1	4	25	41.21	1	3	18.3	127.25	2	4	25	34.77	1	1	7.5	27.79	1	3	20.9					1.25	2.5	4	2.58333
B2RSU6	Cingulin-like 1 OS=Mus musculus GN=Cgnl1 PE=1 SV=1									47.41	1	3	3.5					142.19	3	10	10.3	82.56	2	3	3.1	1	4	2.75	2.58333
F6PYV5	Ubiquitin-associated protein 2 (Fragment) OS=Mus musculus GN=Ubap2 PE=1 SV=1									280.94	4	4	32.2					194.7	3	6	29.8	263.52	3	3	26.5	1	5	1.75	2.58333
Q542D9	Transferrin receptor protein 1 OS=Mus musculus GN=Tfrc PE=1 SV=1									116.9	3	4	5.1					317.41	7	11	16.5	226.22	6	6	9	1	5	1.71429	2.57143
Q61151	Serine/threonine-protein phosphatase 2A 56 kDa regulatory subunit epsilon isoform OS=Mus musculus GN=Ppp2r5e PE=1 SV=3	40.27	1	2	7.5					55.07	1	4	13.3	32.47	1	2	6.2	91.49	2	2	5.6					3	1.66667	3	2.55556
Q3THS6	S-adenosylmethionine synthase isoform type-2 OS=Mus musculus GN=Mat2a PE=1 SV=2									57.9	1	4	11.4					162.29	2	4	14.4	123.57	2	2	8.4	1	5	1.66667	2.55556
D6REF3	14-3-3 protein epsilon OS=Mus musculus GN=Ywhae PE=1 SV=1	46.17	1	5	40													46.93	1	1	21.5	43.57	1	2	24.6	6	1	0.666667	2.55556
G3X8X7	Vacuolar protein sorting 16 (Yeast) OS=Mus musculus GN=Vps16 PE=1 SV=1	58.61	1	1	2.9	41.1	1	2	3.3	187.3	3	5	7.9	77.85	1	1	1.5	133.56	3	3	5.1					0.666667	3	4	2.55556
O88967	ATP-dependent zinc metalloprotease YME1L1 OS=Mus musculus GN=Yme1l1 PE=1 SV=1					37.34	1	3	4.9	158.25	4	6	11.7									34.98	1	2	2.9	0.25	7	0.333333	2.52778
P18760	Cofilin-1 OS=Mus musculus GN=Cfl1 PE=1 SV=3	245.94	4	5	41					265.83	6	7	56.6	302.16	5	7	51.2	246.98	4	6	57.8	464.97	9	12	58.4	6	1	0.538462	2.51282
G3UYD0	General transcription factor II-I OS=Mus musculus GN=Gtf2i PE=1 SV=1	88.11	2	5	8.7					124.36	4	6	8.4	126.06	4	8	11.8	145.25	4	5	9	145.98	4	7	8.8	6	0.777778	0.75	2.50926
Q542P8	EMG1 nucleolar protein homolog (S. cerevisiae), isoform CRA_a OS=Mus musculus GN=Emg1 PE=1 SV=1	46.26	1	2	12.7					121.24	3	3	21.7									27.56	1	1	8.2	3	4	0.5	2.5
Q3TZI5	DNA mismatch repair protein Msh2 OS=Mus musculus GN=Msh2 PE=1 SV=1	100.49	2	4	7.5					157.96	3	5	6.6	89.05	3	3	5.8	216.79	4	6	8.6	101.27	2	6	6.8	5	1.5	1	2.5
A2A5Z6	E3 ubiquitin-protein ligase SMURF2 OS=Mus musculus GN=Smurf2 PE=1 SV=1	67.18	1	2	4.4					64.28	2	2	4.8					33.8	1	2	3.2	47.61	1	1	1.3	3	3	1.5	2.5
Q8BZ03	Serine/threonine-protein kinase D2 OS=Mus musculus GN=Prkd2 PE=1 SV=1	53.08	1	3	4.3					27.66	1	2	3.3	27.48	1	1	2.4	88.71	2	3	6.2	42.33	1	1	2.4	4	1.5	2	2.5
Q6IQX7	Chondroitin sulfate synthase 2 OS=Mus musculus GN=Chpf PE=1 SV=1									98.41	3	5	9.8									31.18	1	1	2.8	1	6	0.5	2.5
D3Z7P0	BRCA1-A complex subunit BRE OS=Mus musculus GN=Bre PE=1 SV=3					49.46	1	1	5.7	90.78	2	2	6.2					38.42	1	3	8.3					0.5	3	4	2.5
P68181	cAMP-dependent protein kinase catalytic subunit beta OS=Mus musculus GN=Prkacb PE=1 SV=2	76.45	2	2	8.5					38.75	1	3	8.5									41.3	1	1	6	3	4	0.5	2.5
Q80TM9	Nischarin OS=Mus musculus GN=Nisch PE=1 SV=2	54.7	1	3	2.3									27.94	1	1	2.1	37.84	1	2	1.7					4	0.5	3	2.5
B2RRT9	Zinc finger Ran-binding domain-containing protein 2 OS=Mus musculus GN=Zranb2 PE=1 SV=1					45.63	1	1	3	262.55	5	5	20.6					179.19	4	5	20.9	209.79	5	5	20.6	0.5	6	1	2.5
Q3TFP0	Serine/arginine-rich-splicing factor 10 OS=Mus musculus GN=Srsf10 PE=1 SV=1	51.36	1	4	19.2									29.64	1	1	6.6	31.48	1	1	6.6					5	0.5	2	2.5
B2RRE7	OTU domain-containing protein 4 OS=Mus musculus GN=Otud4 PE=1 SV=1	45.32	1	5	8.5	55.44	1	5	5.1	42.15	1	4	4.9	51.08	1	1	3.2	78.79	2	3	3.9					1	2.5	4	2.5
O70126	Aurora kinase B OS=Mus musculus GN=Aurkb PE=1 SV=2					45.69	1	1	3.5	45.69	1	3	11.9					30.14	1	2	8.1					0.5	4	3	2.5
A0A0G2JEX1	Nexilin OS=Mus musculus GN=Nexn PE=1 SV=1	62.36	1	5	8.5									53.91	1	1	2.5									6	0.5	1	2.5
E9PUG7	Eukaryotic translation initiation factor 2D OS=Mus musculus GN=Eif2d PE=1 SV=1	74.99	1	2	8.7	88.3	1	3	9.1	169.11	3	4	10.9	134.83	2	2	8	193.77	3	4	14.3					0.75	1.66667	5	2.47222
Q8BP71	RNA binding protein fox-1 homolog 2 OS=Mus musculus GN=Rbfox2 PE=1 SV=2	76.26	1	4	16.3					268.16	5	6	24.3	151.87	3	4	19.8	104.05	2	3	16.7	127.22	3	3	16.7	5	1.4	1	2.46667
Q9CQJ2	PIH1 domain-containing protein 1 OS=Mus musculus GN=Pih1d1 PE=1 SV=1	227.2	4	4	22.1					264.06	5	6	30	266.3	4	4	24.1	181.51	3	5	22.1	226.44	4	5	27.6	5	1.4	1	2.46667
Q9D0I9	Arginine--tRNA ligase, cytoplasmic OS=Mus musculus GN=Rars PE=1 SV=2	38.46	1	4	7.3					443.42	11	17	27.4	368.71	10	14	22.3	397.86	10	14	22.9	239.7	7	12	23	5	1.2	1.15385	2.45128
P53996	Cellular nucleic acid-binding protein OS=Mus musculus GN=Cnbp PE=1 SV=2					42.36	1	2	12.9	140.88	2	2	15.7					153.09	2	3	19.7					0.333333	3	4	2.44444
A0A0H2UH13	Elongator complex protein 6 OS=Mus musculus GN=Elp6 PE=1 SV=1									219.67	6	6	19.4	65.88	1	2	8	81.74	2	3	20.9					1	2.33333	4	2.44444
Q3TWG5	Cytoplasmic dynein 1 light intermediate chain 1 OS=Mus musculus GN=Dync1li1 PE=1 SV=1									155.1	3	4	14.9					82.84	2	7	21	66.41	1	5	15.5	1	5	1.33333	2.44444
Q8K013	GTP-binding protein 10 OS=Mus musculus GN=Gtpbp10 PE=2 SV=1													34.97	1	2	12.3	114.97	3	5	16.7					1	0.333333	6	2.44444
D3YU95	Cytohesin-2 OS=Mus musculus GN=Cyth2 PE=1 SV=1	104.21	2	4	9.5					101.93	2	3	10.2	105.26	2	2	6.1									5	1.33333	1	2.44444
D3Z4V1	Pleiotropic regulator 1 OS=Mus musculus GN=Plrg1 PE=1 SV=1	42.64	1	3	11.7									35.86	1	2	5.6	49.33	1	2	7.7					4	0.333333	3	2.44444
F8WJB0	Mediator of RNA polymerase II transcription subunit 23 OS=Mus musculus GN=Med23 PE=1 SV=1	70.71	1	5	4.6																	27.13	1	2	1.5	6	1	0.333333	2.44444
A2APV2	Formin-like protein 2 OS=Mus musculus GN=Fmnl2 PE=1 SV=2	142.88	3	3	4.9	147.28	2	2	4.7	135.79	3	4	4.1					130.31	3	4	4.2	154.8	3	4	3.6	1.33333	5	1	2.44444
Q3TIV5	Zinc finger CCCH domain-containing protein 15 OS=Mus musculus GN=Zc3h15 PE=1 SV=2	249.54	3	7	26.1	190.41	3	8	28.4	179.97	4	6	22.8	110.67	2	4	12.9	42.66	1	4	10.3					0.888889	1.4	5	2.42963
A0MNP4	CDW13/WDR61 OS=Mus musculus GN=Wdr61 PE=1 SV=1	37.73	1	4	20					313.12	7	9	38.4	146.44	4	6	21.3	29.17	1	4	16.1	108.84	3	5	20	5	1.42857	0.833333	2.42063
Q8CE90	Dual specificity mitogen-activated protein kinase kinase 7 OS=Mus musculus GN=Map2k7 PE=1 SV=1									94.08	3	4	8					74.09	2	4	8	33.68	1	3	5.8	1	5	1.25	2.41667
Q924T3	DNA repair protein XRCC4 OS=Mus musculus GN=Xrcc4 PE=1 SV=1	67.39	1	4	16.3					46.14	1	1	5.2	38.79	1	1	5.2	140.3	2	4	14.4	43.06	1	3	13.2	5	1	1.25	2.41667
E9PV22	Leucine-rich repeat-containing protein 47 OS=Mus musculus GN=Lrrc47 PE=1 SV=1													68.38	2	4	10.9	116.83	3	5	16.9					1	0.2	6	2.4
Q8CJF9	Protein argonaute-3 OS=Mus musculus GN=Ago3 PE=2 SV=2	238	4	5	9.1	327.61	5	8	11.4	201.3	4	5	8.5	110.13	2	3	6.6	148.09	3	4	6.7					0.666667	1.5	5	2.38889
Q9Z1X4	Interleukin enhancer-binding factor 3 OS=Mus musculus GN=Ilf3 PE=1 SV=2	201.39	4	9	10.7	247.79	6	9	10.7	140.78	3	6	8.6	129.53	4	5	8.5	89.88	3	4	6.8					1	1.16667	5	2.38889
A2A6U3	Septin-9 OS=Mus musculus GN=Sept9 PE=1 SV=1	214.67	4	7	14.3	48.6	1	6	12.7	137.31	3	4	6.9													1.14286	5	1	2.38095
O54825	Bystin OS=Mus musculus GN=Bysl PE=1 SV=3	38.7	1	2	7.3					293.4	5	9	22.7	259.09	5	6	17.7	220.87	5	7	16.3	56.72	2	2	4.6	3	1.42857	2.66667	2.36508
Q9D753	Exosome complex component RRP43 OS=Mus musculus GN=Exosc8 PE=1 SV=1	149.3	3	5	30.8									202.12	3	3	17.8	160.78	3	3	14.5	46.67	1	4	22.8	6	0.25	0.8	2.35
F6Z2D6	Ellis-van Creveld syndrome protein homolog (Fragment) OS=Mus musculus GN=Evc PE=4 SV=1	242.68	3	4	43.1																					5	1	1	2.33333
Q4VAA9	Methionine aminopeptidase 1 OS=Mus musculus GN=Metap1 PE=1 SV=1	98.76	2	2	5.7					141.52	2	2	10.1													3	3	1	2.33333
Q9R207	Nibrin OS=Mus musculus GN=Nbn PE=1 SV=1	223.48	4	4	6.3																					5	1	1	2.33333
A2BDX2	Dolichol-phosphate mannosyltransferase subunit 1 OS=Mus musculus GN=Dpm1 PE=1 SV=1	223.3	3	4	24.5																					5	1	1	2.33333
Q8C2Q8	ATP synthase subunit gamma OS=Mus musculus GN=Atp5c1 PE=1 SV=1									211.7	4	4	21.2													1	5	1	2.33333
F7B296	Pleckstrin homology-like domain family B member 1 (Fragment) OS=Mus musculus GN=Phldb1 PE=1 SV=6	210.46	3	4	37.4																					5	1	1	2.33333
Q6PDL0	Cytoplasmic dynein 1 light intermediate chain 2 OS=Mus musculus GN=Dync1li2 PE=1 SV=2									160.63	3	3	6.9					34.79	1	1	1.8					1	4	2	2.33333
A0A0A6YXE5	Mitogen-activated protein kinase kinase kinase kinase 4 (Fragment) OS=Mus musculus GN=Map4k4 PE=1 SV=3									193.93	3	4	27.4													1	5	1	2.33333
H3BJ97	Tubulointerstitial nephritis antigen-like OS=Mus musculus GN=Tinagl1 PE=1 SV=1									221.87	4	4	12					178.59	3	3	8	57.06	2	3	8	1	5	1	2.33333
Q9CQI9	Mediator of RNA polymerase II transcription subunit 30 OS=Mus musculus GN=Med30 PE=1 SV=1	70.46	1	2	18.5					114.47	1	2	11.8													3	3	1	2.33333
J3QNK8	Abl interactor 1 OS=Mus musculus GN=Abi1 PE=1 SV=1																	168.15	3	4	7.5					1	1	5	2.33333
B1AUB8	Nuclear factor 1 OS=Mus musculus GN=Nfia PE=1 SV=1									167.79	4	4	17.9													1	5	1	2.33333
G3UW74	Mediator of RNA polymerase II transcription subunit 16 OS=Mus musculus GN=Med16 PE=1 SV=1	94.71	2	3	6.2													70.58	1	1	2.1					4	1	2	2.33333
Q922R8	Protein disulfide-isomerase A6 OS=Mus musculus GN=Pdia6 PE=1 SV=3									152.97	3	4	18.9													1	5	1	2.33333
E9Q8I7	Protein Nfxl1 OS=Mus musculus GN=Nfxl1 PE=1 SV=1									32.29	1	2	3.7					118.86	2	2	3.4					1	3	3	2.33333
Q8BJZ4	28S ribosomal protein S35, mitochondrial OS=Mus musculus GN=Mrps35 PE=1 SV=2									83.41	2	2	14.1					63.13	2	2	11.3					1	3	3	2.33333
P16254	Signal recognition particle 14 kDa protein OS=Mus musculus GN=Srp14 PE=1 SV=1																	142.75	2	4	41.8					1	1	5	2.33333
Q8BGJ9	Splicing factor U2AF 26 kDa subunit OS=Mus musculus GN=U2af1l4 PE=1 SV=1																	133.44	3	4	14.1					1	1	5	2.33333
F7AJZ3	Gamma-tubulin complex component 3 (Fragment) OS=Mus musculus GN=Tubgcp3 PE=1 SV=1	86.9	1	3	33.7					46.45	1	1	20.9													4	2	1	2.33333
Q542U3	General transcription factor IIH subunit 4 OS=Mus musculus GN=Gtf2h4 PE=1 SV=1									132.43	3	4	12.7													1	5	1	2.33333
Q62523	Zyxin OS=Mus musculus GN=Zyx PE=1 SV=2									94.84	2	2	6					37.49	1	2	4.1					1	3	3	2.33333
Q148V8	Protein FAM83H OS=Mus musculus GN=Fam83h PE=1 SV=1									80.51	1	2	4.1					50.69	1	2	4.1					1	3	3	2.33333
Q3UXS0	Secretory carrier-associated membrane protein 3 OS=Mus musculus GN=Scamp3 PE=1 SV=1									86.02	1	3	11.1					44.45	1	1	6.9					1	4	2	2.33333
G5E8C4	MCG142017, isoform CRA_a OS=Mus musculus GN=Tmtc3 PE=1 SV=1									90.09	2	2	4.2					40.35	1	2	2.2					1	3	3	2.33333
Q8C181	Muscleblind-like protein 2 OS=Mus musculus GN=Mbnl2 PE=2 SV=2									127.56	4	4	9.7													1	5	1	2.33333
Q99J09	Methylosome protein 50 OS=Mus musculus GN=Wdr77 PE=1 SV=1	43.04	1	1	6.4					78.06	2	3	12.9					75.35	2	2	7.9	26.66	1	2	7.9	2	4	1	2.33333
P58774	Tropomyosin beta chain OS=Mus musculus GN=Tpm2 PE=1 SV=1									117.16	2	4	14.8													1	5	1	2.33333
Q8K4Q0	Regulatory-associated protein of mTOR OS=Mus musculus GN=Rptor PE=1 SV=1									116.33	3	4	4.5													1	5	1	2.33333
Q9CZU6	Citrate synthase, mitochondrial OS=Mus musculus GN=Cs PE=1 SV=1	69.91	1	1	3.4					93.32	2	3	9.1					27.62	1	2	10.8	27.55	1	2	4.7	2	4	1	2.33333
Q6NSQ7	Protein LTV1 homolog OS=Mus musculus GN=Ltv1 PE=1 SV=2									115.41	3	4	10.9													1	5	1	2.33333
A0A0G2JEM3	Protein strawberry notch homolog 1 (Fragment) OS=Mus musculus GN=Sbno1 PE=1 SV=1									32.51	1	1	3.3					82.36	2	3	5.5					1	2	4	2.33333
Q9R078	5~-AMP-activated protein kinase subunit beta-1 OS=Mus musculus GN=Prkab1 PE=1 SV=2									74.09	2	2	9.6					37.93	1	2	9.6					1	3	3	2.33333
F6SWS9	Negative elongation factor B (Fragment) OS=Mus musculus GN=Nelfb PE=1 SV=1									72.61	2	2	13.2					39.37	1	2	8.3					1	3	3	2.33333
Q8C4Y3	Negative elongation factor B OS=Mus musculus GN=Nelfb PE=1 SV=2									72.61	2	3	7.6					39.37	1	1	3.8					1	4	2	2.33333
B1AUB9	Nuclear factor 1 OS=Mus musculus GN=Nfia PE=1 SV=1	109.65	2	4	10.3																					5	1	1	2.33333
Q9Z0K8	Pantetheinase OS=Mus musculus GN=Vnn1 PE=1 SV=3									108.68	3	4	11.1													1	5	1	2.33333
D3YVU0	Ubiquitin carboxyl-terminal hydrolase 46 OS=Mus musculus GN=Usp46 PE=1 SV=1									79.34	2	2	10.9					28.38	1	2	8.8					1	3	3	2.33333
D3YX71	Protein Gm8973 OS=Mus musculus GN=Gm8973 PE=4 SV=1									104.1	2	4	24													1	5	1	2.33333
A0A0G2JGG7	Krev interaction trapped protein 1 OS=Mus musculus GN=Krit1 PE=1 SV=1									101.64	3	4	11.4													1	5	1	2.33333
Q9CZW4	Long-chain-fatty-acid--CoA ligase 3 OS=Mus musculus GN=Acsl3 PE=1 SV=2																	97.32	3	4	8.1					1	1	5	2.33333
Q8BG02	Serine/threonine-protein phosphatase 2A 55 kDa regulatory subunit B gamma isoform OS=Mus musculus GN=Ppp2r2c PE=1 SV=1	54.96	1	2	4													39.83	1	2	6.9					3	1	3	2.33333
Q8R5L1	Complement component 1 Q subcomponent-binding protein, mitochondrial OS=Mus musculus GN=C1qbp PE=1 SV=1	61.01	1	3	11.8	46.49	1	1	4.7	145.65	3	3	16.8													2	4	1	2.33333
Q9JJ66	Cell division cycle protein 20 homolog OS=Mus musculus GN=Cdc20 PE=1 SV=2	76.29	2	3	7.4					190.7	3	3	7.8	39.48	1	1	1.6	34.01	1	1	1.6	46.42	1	1	1.6	4	2	1	2.33333
E9PVB5	Tetratricopeptide repeat protein 17 OS=Mus musculus GN=Ttc17 PE=1 SV=1									91.87	2	4	3.9													1	5	1	2.33333
Q3TPX4	Exocyst complex component 5 OS=Mus musculus GN=Exoc5 PE=1 SV=2	51.93	1	1	4.7					39.42	1	3	7.5													2	4	1	2.33333
Q924C1	Exportin-5 OS=Mus musculus GN=Xpo5 PE=1 SV=1									35.74	1	1	1.4					50.18	1	3	4.7					1	2	4	2.33333
Q8JZS0	Protein lin-7 homolog A OS=Mus musculus GN=Lin7a PE=1 SV=2	93.09	2	2	24.9	41.27	1	2	21.9	111.26	2	3	28.3					105.93	2	3	23.6	59.54	1	1	18	1	4	2	2.33333
Q497N0	Chaperonin containing Tcp1, subunit 6b (Zeta) OS=Mus musculus GN=Cct6b PE=1 SV=1									79.17	2	4	9.6													1	5	1	2.33333
F8VQ11	Rho GTPase-activating protein 23 OS=Mus musculus GN=Arhgap23 PE=1 SV=1																	78.02	2	4	4.9					1	1	5	2.33333
F8WJ43	Merlin (Fragment) OS=Mus musculus GN=Nf2 PE=1 SV=1	47.23	1	3	8.8					29.95	1	1	3.6													4	2	1	2.33333
A2ALW5	DnaJ homolog subfamily C member 25 OS=Mus musculus GN=Dnajc25 PE=1 SV=1									117.56	3	4	19.9					27.58	1	1	2.8	32.12	1	1	2.8	1	5	1	2.33333
Q9D104	Signal recognition particle 19 kDa protein OS=Mus musculus GN=Srp19 PE=1 SV=1	75.91	1	4	45.8																					5	1	1	2.33333
Q54AE5	Brain cDNA, clone MNCb-5810, similar to Mus musculus tissue inhibitor of metalloproteinase 3 (Timp3), mRNA OS=Mus musculus GN=Timp3 PE=1 SV=1									75.57	2	4	19.4													1	5	1	2.33333
Q8BPM0	Disheveled-associated activator of morphogenesis 1 OS=Mus musculus GN=Daam1 PE=1 SV=4									45.9	1	1	1.5					27.73	1	3	3.9					1	2	4	2.33333
F8WIG5	Protein diaphanous homolog 3 OS=Mus musculus GN=Diap3 PE=1 SV=2									28.16	1	2	1.9					43.84	1	2	2.1					1	3	3	2.33333
G3X8Y3	N-alpha-acetyltransferase 15, NatA auxiliary subunit OS=Mus musculus GN=Naa15 PE=1 SV=1									70.82	2	4	6.1													1	5	1	2.33333
D3YXA2	Lariat debranching enzyme (Fragment) OS=Mus musculus GN=Dbr1 PE=1 SV=1									41.24	1	3	22.1					27.17	1	1	3.9					1	4	2	2.33333
A0A0A6YY67	Calmodulin-regulated spectrin-associated protein 2 OS=Mus musculus GN=Camsap2 PE=1 SV=1	66.11	1	4	4.3																					5	1	1	2.33333
D3YVY9	Protein Dscc1 OS=Mus musculus GN=Dscc1 PE=1 SV=1	74.48	2	3	6.5	45.3	1	3	7.6	82.38	2	3	5.6					66.42	2	3	7.4	34.22	1	1	2.6	1	4	2	2.33333
E9Q8X9	Actin filament-associated protein 1 (Fragment) OS=Mus musculus GN=Afap1 PE=1 SV=1									65.36	2	4	7.5													1	5	1	2.33333
D3YUY3	Phosphatidylinositol 4-phosphate 5-kinase type-1 alpha OS=Mus musculus GN=Pip5k1a PE=1 SV=1									63.53	2	4	13.3													1	5	1	2.33333
P46737	Lys-63-specific deubiquitinase BRCC36 OS=Mus musculus GN=Brcc3 PE=1 SV=1									62.77	2	4	17.5													1	5	1	2.33333
B2RUR8	OTU domain-containing protein 7B OS=Mus musculus GN=Otud7b PE=1 SV=1									61.48	2	4	6.4													1	5	1	2.33333
Q9CXW2	28S ribosomal protein S22, mitochondrial OS=Mus musculus GN=Mrps22 PE=1 SV=1									57.42	2	4	12													1	5	1	2.33333
A2BI37	Zinc finger protein 185 OS=Mus musculus GN=Zfp185 PE=1 SV=1	53.3	1	4	10.3																					5	1	1	2.33333
O35071	Kinesin-like protein KIF1C OS=Mus musculus GN=Kif1c PE=1 SV=2																	51.5	1	4	5.8					1	1	5	2.33333
Q8BTF7	DNA ligase 4 OS=Mus musculus GN=Lig4 PE=2 SV=2																	46.66	1	4	6.3					1	1	5	2.33333
P19096	Fatty acid synthase OS=Mus musculus GN=Fasn PE=1 SV=2																	45.01	1	4	2.2					1	1	5	2.33333
P46718	Programmed cell death protein 2 OS=Mus musculus GN=Pdcd2 PE=2 SV=2																	36.66	1	4	20.1					1	1	5	2.33333
A0A0G2JEA0	Ankyrin repeat and IBR domain-containing protein 1 (Fragment) OS=Mus musculus GN=Ankib1 PE=1 SV=1									40.59	1	4	7.4					99.37	2	3	5.3	69.09	2	3	5.4	1	5	1	2.33333
F6SLP4	Endoplasmic reticulum-Golgi intermediate compartment protein 1 (Fragment) OS=Mus musculus GN=Ergic1 PE=1 SV=1																	32.83	1	4	34.3					1	1	5	2.33333
F6Q5A5	Serine/threonine-protein kinase MRCK alpha (Fragment) OS=Mus musculus GN=Cdc42bpa PE=1 SV=1																	32.47	1	4	6.8					1	1	5	2.33333
E9PWE8	Dihydropyrimidinase-related protein 3 OS=Mus musculus GN=Dpysl3 PE=1 SV=1									31.93	1	4	6.7													1	5	1	2.33333
B2RRH9	GMP synthase [glutamine-hydrolyzing] OS=Mus musculus GN=Gmps PE=1 SV=1									30.1	1	4	8.1													1	5	1	2.33333
F8WHM5	Golgi apparatus protein 1 (Fragment) OS=Mus musculus GN=Glg1 PE=1 SV=1									29.15	1	4	5													1	5	1	2.33333
A2AAJ9	Obscurin OS=Mus musculus GN=Obscn PE=1 SV=2									27.37	1	4	1.2													1	5	1	2.33333
Q4FK36	Destrin OS=Mus musculus GN=Dstn PE=1 SV=1	133.59	2	3	21.8	101	2	2	13.9	147.8	3	3	21.8	187.67	4	5	28.5	146.98	3	4	28.5					1.33333	0.666667	5	2.33333
A0A0A0MQC2	Pleckstrin homology domain-containing family G member 5 OS=Mus musculus GN=Plekhg5 PE=1 SV=1									37.9	1	4	5.9	31.08	1	4	5.9	28.93	1	4	5.1					1	1	5	2.33333
Q3U3J3	DNA-directed RNA polymerase OS=Mus musculus GN=Polrmt PE=1 SV=1									35.12	1	3	4.8	30.52	1	1	3.5	28.37	1	3	4.7					1	2	4	2.33333
F6TPX8	AP-2 complex subunit alpha-1 (Fragment) OS=Mus musculus GN=Ap2a1 PE=1 SV=1	75.82	2	4	14.8					171.23	4	5	20.2	200.25	4	5	20.2	173.66	4	6	20.8	130.89	3	6	20.2	5	1	1	2.33333
Q3TWR3	5~-AMP-activated protein kinase subunit gamma-1 OS=Mus musculus GN=Prkag1 PE=1 SV=1					53.24	1	1	3	161.16	3	5	17.6	140.9	3	3	20	50.05	1	4	15.2					0.5	1.5	5	2.33333
Q9DBG7	Signal recognition particle receptor subunit alpha OS=Mus musculus GN=Srpr PE=1 SV=1	848.39	14	19	27.5	278.36	5	11	20.9	671.21	13	19	35.1	79.72	1	4	11	521.62	8	11	16.2	333.42	7	9	25.9	1.66667	4	1.2	2.28889
Q3V117	ATP-citrate synthase OS=Mus musculus GN=Acly PE=1 SV=1	35.07	1	4	3.8					259.91	7	11	12.3	209.62	5	9	10.4	601.3	13	18	19.8	1430.73	26	28	26.6	5	1.2	0.655172	2.28506
Q8CJF8	Protein argonaute-4 OS=Mus musculus GN=Ago4 PE=2 SV=2	102.07	2	4	7.2	90.58	2	5	7.4	127.13	3	4	6.7													0.833333	5	1	2.27778
B1AZS9	Peroxiredoxin-4 (Fragment) OS=Mus musculus GN=Prdx4 PE=1 SV=1	161.15	3	4	14.4	206.28	4	5	20.1	115.11	3	4	14.4					78.12	2	2	11.4	80.28	2	2	8.3	0.833333	5	1	2.27778
Q8BL80	Rho GTPase-activating protein 22 OS=Mus musculus GN=Arhgap22 PE=1 SV=2									249.09	5	5	7.3	131.24	3	7	11.3	87.35	2	4	6.7					1	0.75	5	2.25
O77727	Keratin, type I cytoskeletal 15 (Contact-Cont) OS=Ovis aries GN=KRT15 PE=2 SV=1	221.45	3	5	8.6	217.28	4	7	7.7	173.47	4	4	8.2													0.75	5	1	2.25
E0CXD6	Traf2 and NCK-interacting protein kinase OS=Mus musculus GN=Tnik PE=1 SV=1									128.86	3	6	5.2	110.03	3	3	5.2	81.51	2	3	2.5					1	1.75	4	2.25
A0A0A0MQF5	OTU domain-containing protein 6B OS=Mus musculus GN=Otud6b PE=1 SV=1									190.67	4	4	17.5					78.44	2	2	4.9	148.72	3	3	14.2	1	5	0.75	2.25
Q9WVH9	Fibulin-5 OS=Mus musculus GN=Fbln5 PE=1 SV=1	36.53	1	1	4.5					31.81	1	3	7.6					30.28	1	2	4.5	121.39	3	3	7.6	2	4	0.75	2.25
Q8K205	Blood vessel epicardial substance OS=Mus musculus GN=Pop1 PE=1 SV=1									119.1	3	3	4					96.06	2	4	5.5	58.44	1	2	2.2	1	4	1.66667	2.22222
Q6PGG6	Guanine nucleotide-binding protein-like 3-like protein OS=Mus musculus GN=Gnl3l PE=1 SV=1									67.32	2	4	8.8	32.93	1	2	5.4	75.51	2	3	7.8					1	1.66667	4	2.22222
Q922Q2	Serine/threonine-protein kinase RIO1 OS=Mus musculus GN=Riok1 PE=1 SV=2	103.41	2	3	4.9					140.32	3	4	9	70.89	1	2	5.1	198.08	4	4	10.1	165.29	3	4	8.8	4	1.66667	1	2.22222
Q8BH43	Wiskott-Aldrich syndrome protein family member 2 OS=Mus musculus GN=Wasf2 PE=1 SV=1	98.77	2	3	10.5					243.73	4	4	10.1	170.34	2	2	5.4	266.39	4	4	11.3	256.74	4	4	11.5	4	1.66667	1	2.22222
Q69ZS7	HBS1-like protein OS=Mus musculus GN=Hbs1l PE=1 SV=2									29.01	1	4	9.8	55.96	2	2	4.3	37.17	1	3	7.9					1	1.66667	4	2.22222
P54775	26S protease regulatory subunit 6B OS=Mus musculus GN=Psmc4 PE=1 SV=2									71.74	2	4	12.7					29.38	1	3	8.4	135.62	3	5	15.8	1	5	0.666667	2.22222
Q8CES0	N-alpha-acetyltransferase 30 OS=Mus musculus GN=Naa30 PE=1 SV=2	97.4	2	3	11					126.65	3	3	9.3	34.53	1	2	5.2	155.92	3	3	10.2	98.9	2	2	6.6	4	1.33333	1.33333	2.22222
Q6P1Y9	Exocyst complex component 1 OS=Mus musculus GN=Exoc1 PE=1 SV=1					46.84	1	2	5.2	71.21	2	5	6.4									63.01	2	2	2.6	0.333333	6	0.333333	2.22222
Q9Z110	Delta-1-pyrroline-5-carboxylate synthase OS=Mus musculus GN=Aldh18a1 PE=1 SV=2	468.72	8	17	24.4	461.25	8	13	18.9	817.76	16	21	32.6	55.46	2	4	6.5	2393.93	39	49	53.8	2943.42	44	52	53.3	1.28571	4.4	0.943396	2.2097
E9Q6H4	Cullin-7 OS=Mus musculus GN=Cul7 PE=1 SV=1	57.59	1	4	9.2	263.59	5	7	14.5	184.95	3	4	9.6													0.625	5	1	2.20833
Q8BND3	WD repeat-containing protein 35 OS=Mus musculus GN=Wdr35 PE=1 SV=3	46.68	1	2	3.4					75.18	1	2	3.6					86.66	1	2	4	36.24	1	4	3.6	3	3	0.6	2.2
Q8R2U0	Nucleoporin SEH1 OS=Mus musculus GN=Seh1l PE=2 SV=1	186.11	3	7	30.3	139.95	3	4	19.2	116.55	3	3	14.4													1.6	4	1	2.2
Q6P6L6	Gem (Nuclear organelle) associated protein 4 OS=Mus musculus GN=Gemin4 PE=1 SV=1	215.41	4	6	8.8	56.58	1	2	3.1	382.84	8	9	9.8	53.71	1	2	3	283.69	6	6	7.8	184.89	5	7	7.9	2.33333	3.33333	0.875	2.18056
Q62376	U1 small nuclear ribonucleoprotein 70 kDa OS=Mus musculus GN=Snrnp70 PE=1 SV=2	44.47	1	2	4.2					163.01	3	6	18.3	39.74	1	2	6.7	37.53	1	5	17.6	38.73	1	4	11.2	3	2.33333	1.2	2.17778
Q8BFV2	PCI domain-containing protein 2 OS=Mus musculus GN=Pcid2 PE=1 SV=1					36.37	1	1	4	114.16	3	3	11.5					42.36	1	1	4					0.5	4	2	2.16667
Q9CZU4	GTPase Era, mitochondrial OS=Mus musculus GN=Eral1 PE=2 SV=1									48.52	1	2	7.1	43.14	1	1	3.9	91.55	2	3	9.4					1	1.5	4	2.16667
Q8BFT2	HAUS augmin-like complex subunit 4 OS=Mus musculus GN=Haus4 PE=1 SV=1									98.5	2	4	13.2									27.48	1	1	8	1	5	0.5	2.16667
P29268	Connective tissue growth factor OS=Mus musculus GN=Ctgf PE=2 SV=3	138.69	3	5	17	40.05	1	3	8.6	114.92	3	3	8.6					117.51	3	4	11.2	155.39	4	4	11.2	1.5	4	1	2.16667
A1L3S7	Gatad2b protein OS=Mus musculus GN=Gatad2b PE=1 SV=1	81.12	1	5	14.7	60.4	1	3	9.9	58.62	1	3	8.3													1.5	4	1	2.16667
E9QN12	Platelet-derived growth factor receptor beta OS=Mus musculus GN=Pdgfrb PE=1 SV=1									38.48	1	3	2.8					37.98	1	2	2.8	27.77	1	1	1.5	1	4	1.5	2.16667
S4R1R7	MCG50795 OS=Mus musculus GN=Rpl9-ps1 PE=4 SV=1					103.42	1	1	9.9									186.48	3	4	22					0.5	1	5	2.16667
Q60848	Lymphocyte-specific helicase OS=Mus musculus GN=Hells PE=1 SV=2	337.04	6	19	22.9	208.3	4	7	14.7	345.35	7	15	24	258.9	6	7	11.3	160.04	4	9	11.7	79.08	2	4	6.3	2.5	2	2	2.16667
Q6ZQ04	FERM domain-containing protein 4B (Fragment) OS=Mus musculus GN=Frmd4b PE=1 SV=1									27.4	1	2	3.2	28.32	1	1	3	37.78	1	3	3.5					1	1.5	4	2.16667
Q5SWD9	Pre-rRNA-processing protein TSR1 homolog OS=Mus musculus GN=Tsr1 PE=1 SV=1	282.62	5	11	13.9	171.75	3	3	8.1	452.31	11	15	18.2	184.02	4	5	9.1	236.52	4	9	14.1	333.84	6	11	18.4	3	2.66667	0.833333	2.16667
Q8BWY3	Eukaryotic peptide chain release factor subunit 1 OS=Mus musculus GN=Etf1 PE=1 SV=4									84	2	4	10.3									46.22	1	1	3	1	5	0.5	2.16667
Q8C2T6	DNA polymerase alpha subunit B OS=Mus musculus GN=Pola2 PE=1 SV=1					41.55	1	1	2.8	39.77	1	1	2.3					37.9	1	3	6.5					0.5	2	4	2.16667
Q78P92	FSHD Region Gene 1 protein OS=Mus musculus GN=Frg1 PE=1 SV=1	69.34	1	4	23.6	69.72	1	4	29.5	61.59	1	3	15.5					69.8	1	2	11.2	76.69	1	1	5	1	4	1.5	2.16667
A0A0G2JG59	Nexilin (Fragment) OS=Mus musculus GN=Nexn PE=1 SV=1	62.36	1	4	10.8									53.91	1	1	4									5	0.5	1	2.16667
Q8CBE3	WD repeat-containing protein 37 OS=Mus musculus GN=Wdr37 PE=1 SV=1									56.05	1	4	12.1	41.16	1	1	4.4	32.87	1	5	17.9	44.3	1	1	4.4	1	2.5	3	2.16667
Q8CJ40	Rootletin OS=Mus musculus GN=Crocc PE=1 SV=2	46.64	1	3	4.8					52.59	1	2	1.7	39.98	1	3	4.3	50.42	1	4	3.2	29.65	1	2	4	4	0.75	1.66667	2.13889
Q3UI33	Methionine aminopeptidase 2 OS=Mus musculus GN=Metap2 PE=1 SV=1	88.35	2	3	12.1					468.6	9	14	42.4	322.94	5	13	35.9	249.17	6	11	31.4	218.73	4	8	25.4	4	1.07143	1.33333	2.13492
Q9JM96	Cdc42 effector protein 4 OS=Mus musculus GN=Cdc42ep4 PE=1 SV=1									34.53	1	3	12.6					29.79	1	6	20.1	116.35	2	4	15.2	1	4	1.4	2.13333
Q6NXJ0	Protein WWC2 OS=Mus musculus GN=Wwc2 PE=1 SV=1	185.01	3	7	12.7	140.08	3	4	6.6	905.92	16	24	25.3	223.94	5	6	5.6	711.35	13	18	18.9	556.76	11	15	14.8	1.6	3.57143	1.1875	2.11964
P17751	Triosephosphate isomerase OS=Mus musculus GN=Tpi1 PE=1 SV=4	120.7	2	3	11.7	51.68	1	2	7.4	81.77	1	3	15.4					84.69	2	2	11.4	61.48	2	2	10.4	1.33333	4	1	2.11111
Q9D4H1	Exocyst complex component 2 OS=Mus musculus GN=Exoc2 PE=1 SV=1									158.97	4	9	9.6	56.74	1	2	3.4	128.93	3	9	11.3	75.38	2	4	5.7	1	3.33333	2	2.11111
B2RVL6	Zinc finger CCHC domain-containing protein 24 OS=Mus musculus GN=Zcchc24 PE=1 SV=1	41.43	1	3	15.4	47.2	1	2	8.3	119.57	3	3	20.7					34.47	1	1	9.5	50.11	1	1	7.1	1.33333	4	1	2.11111
A2BEE9	Disks large homolog 3 OS=Mus musculus GN=Dlg3 PE=1 SV=1					69.13	1	2	5	114.69	3	3	6					33.76	1	1	4.6					0.333333	4	2	2.11111
Q3UGS4	Protein FAM195B OS=Mus musculus GN=Fam195b PE=1 SV=1	54.36	1	3	41.2					97.26	2	3	29.9	31.24	1	1	18.6					50.13	1	2	18.6	4	2	0.333333	2.11111
Q3UE31	Uncharacterized protein KIAA0930 homolog OS=Mus musculus PE=1 SV=2									93.36	2	4	18.3									42.41	1	2	7.2	1	5	0.333333	2.11111
F6YHZ8	F-actin-capping protein subunit beta (Fragment) OS=Mus musculus GN=Capzb PE=1 SV=1					112.93	2	2	22.3	182.21	3	4	23.4													0.333333	5	1	2.11111
Q9QXE7	F-box-like/WD repeat-containing protein TBL1X OS=Mus musculus GN=Tbl1x PE=1 SV=2	44.6	1	2	5.9					37.64	1	2	4.2									56.31	2	2	3.8	3	3	0.333333	2.11111
Q3UYV9	Nuclear cap-binding protein subunit 1 OS=Mus musculus GN=Ncbp1 PE=1 SV=2	131	3	4	7.1	164.24	3	5	7.5	112	2	7	9	64.97	1	1	2.8	188.24	4	5	7.2	127.81	2	3	4.7	0.833333	4	1.5	2.11111
B2RRY4	MAGUK p55 subfamily member 5 OS=Mus musculus GN=Mpp5 PE=1 SV=1	45.15	1	3	7													58.56	1	3	7.9	103.07	2	2	9.2	4	1	1.33333	2.11111
Q1HL32	Structural maintenance of chromosomes protein OS=Mus musculus GN=Smc3 PE=1 SV=1	686.66	12	25	26.6	386.71	6	15	17.9	1181.94	22	31	29	300.55	7	12	13.1	847	18	28	30.2	405.58	8	12	14.5	1.625	2.46154	2.23077	2.10577
E0CXL4	Partitioning defective 3 homolog OS=Mus musculus GN=Pard3 PE=1 SV=1	57.74	1	3	3.9					182.88	4	4	5.7	29.37	1	3	4.9									4	1.25	1	2.08333
Q6P5D3	Putative ATP-dependent RNA helicase DHX57 OS=Mus musculus GN=Dhx57 PE=1 SV=2	94.57	2	3	3.5					54.09	2	4	3.8	41.92	1	3	4.1	42.27	1	2	3.1	42.61	1	2	3.9	4	1.25	1	2.08333
A0A0G2JFN7	Ubiquitin-associated protein 2-like (Fragment) OS=Mus musculus GN=Ubap2l PE=1 SV=1					123.48	2	3	12.3									236.57	4	4	16.3					0.25	1	5	2.08333
H3BIX8	Rho guanine nucleotide exchange factor 2 (Fragment) OS=Mus musculus GN=Arhgef2 PE=1 SV=1									158.05	2	4	37.7									83.88	2	3	26.2	1	5	0.25	2.08333
P18872	Guanine nucleotide-binding protein G(o) subunit alpha OS=Mus musculus GN=Gnao1 PE=1 SV=3	111.67	2	2	8.5	74.7	1	1	5.1	146.61	2	3	8.5					148.53	2	2	8.5	188.17	3	3	8.5	1.5	4	0.75	2.08333
Q9CYD3	Cartilage-associated protein OS=Mus musculus GN=Crtap PE=1 SV=3									103.5	2	3	8					33.28	1	4	8.5	92.1	2	3	6.5	1	4	1.25	2.08333
D3Z3A8	Unconventional myosin-IXa OS=Mus musculus GN=Myo9a PE=1 SV=1	49.06	1	4	3.3																	28.69	1	3	1.4	5	1	0.25	2.08333
A0A0A6YXY3	Structural maintenance of chromosomes protein 4 (Fragment) OS=Mus musculus GN=Smc4 PE=1 SV=1	48.68	1	1	21.1									104.24	3	3	33	64.36	2	3	30.3					2	0.25	4	2.08333
Q3UA06	Pachytene checkpoint protein 2 homolog OS=Mus musculus GN=Trip13 PE=1 SV=1									35.87	1	3	9					76.94	2	4	11.3	109.41	2	3	8.8	1	4	1.25	2.08333
E9QNE9	Mitogen-activated protein kinase kinase kinase kinase OS=Mus musculus GN=Map4k3 PE=1 SV=1					36.96	1	3	3.7	99.76	3	4	6.1					91.21	2	5	7.7	149.69	4	5	6.3	0.25	5	1	2.08333
D3Z030	Leucine-rich repeat-containing protein 16A OS=Mus musculus GN=Lrrc16a PE=1 SV=2	50.13	1	4	4.9																	73.72	2	3	2.6	5	1	0.25	2.08333
Q9D6Z1	Nucleolar protein 56 OS=Mus musculus GN=Nop56 PE=1 SV=2	232.07	4	10	18.3	169.73	3	8	16.2	298.67	7	10	26.2	65.53	1	3	5.9	235.51	6	8	20	73.66	2	3	5.9	1.22222	2.75	2.25	2.07407
Q9D2N9	Vacuolar protein sorting-associated protein 33A OS=Mus musculus GN=Vps33a PE=1 SV=2	39	1	3	7.5					241.13	6	10	20.6	113.46	3	8	17.6	112.35	3	4	11	83.93	2	4	7.5	4	1.22222	1	2.07407
Q8CGC7	Bifunctional glutamate/proline--tRNA ligase OS=Mus musculus GN=Eprs PE=1 SV=4									607.13	12	14	11.8	297.74	6	7	8.6	188.98	4	9	8.7	26.13	1	2	1.7	1	1.875	3.33333	2.06944
E9PUC2	Long-chain-fatty-acid--CoA ligase 3 OS=Mus musculus GN=Acsl3 PE=1 SV=1									131.68	3	4	11.6									26.62	1	4	12.3	1	5	0.2	2.06667
P62715	Serine/threonine-protein phosphatase 2A catalytic subunit beta isoform OS=Mus musculus GN=Ppp2cb PE=1 SV=1	132.93	2	4	16.8									38.59	1	4	23.6									5	0.2	1	2.06667
F6Y9I5	Peripheral plasma membrane protein CASK (Fragment) OS=Mus musculus GN=Cask PE=1 SV=1	141.37	3	4	20.9																	75.17	2	4	19.1	5	1	0.2	2.06667
G5E8T6	Membrane associated guanylate kinase, WW and PDZ domain containing 3, isoform CRA_a OS=Mus musculus GN=Magi3 PE=1 SV=1	105.2	2	3	3									77.04	2	4	3.8	107.77	3	5	4.4	76.86	2	2	4.7	4	0.2	2	2.06667
D3YYN3	Exosome complex component RRP43 (Fragment) OS=Mus musculus GN=Exosc8 PE=1 SV=1					182.92	3	4	33.1	154.47	3	4	52.3													0.2	5	1	2.06667
Q3TGS5	Protein-L-isoaspartate (D-aspartate) O-methyltransferase domain containing 1 OS=Mus musculus GN=Pcmtd1 PE=1 SV=1					117.53	2	4	10.9	29.39	1	4	12													0.2	5	1	2.06667
O70585	Dystrobrevin beta OS=Mus musculus GN=Dtnb PE=1 SV=3													28.78	1	5	10.8	115.84	3	4	8					1	0.166667	5	2.05556
Q14BR4	ADP-ribosylation factor 4 OS=Mus musculus GN=Arf4 PE=1 SV=1	63.35	1	3	17.2					245.54	4	4	30	202.14	4	5	26.7	167.36	3	3	30	45.59	1	2	15.6	4	0.833333	1.33333	2.05556
Q9Z331	Keratin, type II cytoskeletal 6B OS=Mus musculus GN=Krt6b PE=1 SV=3					202.96	3	6	11.6	209.26	4	4	6.2													0.142857	5	1	2.04762
D3Z1Y5	Rho GTPase activating protein 22 OS=Mus musculus GN=Arhgap22 PE=1 SV=1	110.65	2	4	8.2																	222.56	4	7	17.3	5	1	0.125	2.04167
Q9D0M0	Exosome complex exonuclease RRP42 OS=Mus musculus GN=Exosc7 PE=1 SV=2	42.95	1	3	17.5	96.77	2	2	12	228.88	5	6	36.4	90.75	2	3	20.6	102.36	2	2	12					1.33333	1.75	3	2.02778
P26043	Radixin OS=Mus musculus GN=Rdx PE=1 SV=3	666.89	13	21	35.8	596.86	11	18	24.4	462.53	10	18	26.9	234.81	5	6	12.2	352.9	8	10	13.2	159.45	4	4	10.6	1.15789	2.71429	2.2	2.02406
G3X9Q6	La-related protein 4 OS=Mus musculus GN=Larp4 PE=1 SV=1	346.75	6	11	20.2	62.76	1	4	5.3	455.11	9	13	27.3	149.89	4	5	11	317.68	7	11	20.2	289.8	6	8	15.4	2.4	2.33333	1.33333	2.02222
D3YZW1	SLIT-ROBO Rho GTPase-activating protein 1 OS=Mus musculus GN=Srgap1 PE=1 SV=1	386.73	7	11	13.8	195.96	3	5	6.7	170.91	4	8	10.6	33.01	1	3	3.9	232.62	4	8	10	90.51	2	4	4.7	2	2.25	1.8	2.01667
Q6IFZ9	Keratin, type II cytoskeletal 74 OS=Mus musculus GN=Krt74 PE=3 SV=1	185.28	3	4	10.1	197.61	3	5	7.9	117.19	2	3	5.1					118.81	2	5	8.3	156.06	3	4	5.3	0.833333	4	1.2	2.01111
F7CRG8	Serine/threonine-protein kinase MARK2 (Fragment) OS=Mus musculus GN=Mark2 PE=1 SV=1									224.46	3	3	37.9													1	4	1	2
A0A087WP00	Nucleolar protein 58 (Fragment) OS=Mus musculus GN=Nop58 PE=1 SV=1																	198.04	2	3	30.8					1	1	4	2
Q9DBC7	cAMP-dependent protein kinase type I-alpha regulatory subunit OS=Mus musculus GN=Prkar1a PE=1 SV=3									59.65	1	1	5.5					121.36	2	2	7.6					1	2	3	2
D3YVS1	Smoothelin OS=Mus musculus GN=Smtn PE=1 SV=1	175.15	2	3	15.6																					4	1	1	2
Q61496	Probable ATP-dependent RNA helicase DDX4 OS=Mus musculus GN=Ddx4 PE=1 SV=2									156.17	3	3	8.7													1	4	1	2
F8WHJ2	GTP-binding protein 10 OS=Mus musculus GN=Gtpbp10 PE=1 SV=1									154.93	3	3	16													1	4	1	2
D3Z216	TGF-beta-activated kinase 1 and MAP3K7-binding protein 2 (Fragment) OS=Mus musculus GN=Tab2 PE=1 SV=1									153.06	2	3	8.3													1	4	1	2
Q545F0	MCG3124, isoform CRA_b OS=Mus musculus GN=Mif PE=1 SV=1									106.51	2	2	26.1					45.65	1	1	7.8					1	3	2	2
P19426	Negative elongation factor E OS=Mus musculus GN=Nelfe PE=1 SV=2									148.72	3	3	11.5													1	4	1	2
Q920Q6	RNA-binding protein Musashi homolog 2 OS=Mus musculus GN=Msi2 PE=1 SV=1									144.45	3	3	15.3													1	4	1	2
P97857	A disintegrin and metalloproteinase with thrombospondin motifs 1 OS=Mus musculus GN=Adamts1 PE=1 SV=4									137.77	3	3	4.3													1	4	1	2
Q497K3	MCG4969 OS=Mus musculus GN=Snrpf PE=1 SV=1									136.27	3	3	43													1	4	1	2
B1AQR8	Galectin OS=Mus musculus GN=Lgals9 PE=1 SV=1									88.77	2	2	6					44.74	1	1	2.3					1	3	2	2
Q3V214	DNA-directed RNA polymerases I, II, and III subunit RPABC1 OS=Mus musculus GN=Polr2e PE=1 SV=1									105.32	2	2	14.3					28.15	1	1	4.3					1	3	2	2
Q6PGA2	GTP-binding protein RAD OS=Mus musculus GN=Rrad PE=1 SV=1									131.65	3	3	13					73.69	2	2	10.1	25.52	1	2	7.5	1	4	1	2
O35658	Complement component 1 Q subcomponent-binding protein, mitochondrial OS=Mus musculus GN=C1qbp PE=1 SV=1									95.94	2	2	12.9					31.47	1	1	7.9					1	3	2	2
A0A0G2JFV9	Exosome complex component RRP45 (Fragment) OS=Mus musculus GN=Exosc9 PE=1 SV=1	123.42	2	3	26.5																					4	1	1	2
Q9D0N7	Chromatin assembly factor 1 subunit B OS=Mus musculus GN=Chaf1b PE=1 SV=1									73.57	1	1	3.8					49.42	1	2	3.8					1	2	3	2
Q543X5	CCR4-NOT transcription complex subunit 7 OS=Mus musculus GN=Cnot7 PE=1 SV=1	122.55	2	3	15.4																					4	1	1	2
Q91Z31	Polypyrimidine tract-binding protein 2 OS=Mus musculus GN=Ptbp2 PE=1 SV=2	118.52	2	3	5.3																					4	1	1	2
F6YBB8	RNA-binding protein NOB1 (Fragment) OS=Mus musculus GN=Nob1 PE=1 SV=1									116.5	3	3	64.5													1	4	1	2
Q3UZZ3	Serine/threonine-protein kinase ICK OS=Mus musculus GN=Ick PE=1 SV=1	55.61	1	1	4.5													60.49	1	2	3					2	1	3	2
Q8BSP2	Condensin-2 complex subunit H2 OS=Mus musculus GN=Ncaph2 PE=1 SV=1									121.38	2	3	5.9					106.41	2	2	5.6	40.93	1	2	3.3	1	4	1	2
Q4FJN9	Farnesyl pyrophosphate synthase OS=Mus musculus GN=Fdps PE=1 SV=1																	114.5	2	3	11.9					1	1	4	2
Q9CXF7	Chromodomain-helicase-DNA-binding protein 1-like OS=Mus musculus GN=Chd1l PE=1 SV=1									99.85	3	3	3.4	37.06	1	1	0.9	114.64	2	2	3.9					1	2	3	2
Q8C0V9	FERM domain-containing protein 6 OS=Mus musculus GN=Frmd6 PE=1 SV=2									42.97	1	2	4					70.68	1	1	3.5					1	3	2	2
D3Z700	TFIIH basal transcription factor complex helicase XPD subunit OS=Mus musculus GN=Ercc2 PE=1 SV=1									78.23	2	2	8.7					33.55	1	1	4.9					1	3	2	2
Q8BH76	DNA polymerase delta subunit 3 OS=Mus musculus GN=Pold3 PE=1 SV=1									64.37	2	2	7.6					45.83	1	1	2.8					1	3	2	2
B9EHN0	Ubiquitin-activating enzyme E1, Chr X OS=Mus musculus GN=Uba1 PE=1 SV=1									39.71	1	2	3.4					66.59	1	1	2.6					1	3	2	2
E9PWU7	Kinesin-like protein OS=Mus musculus GN=Kifc3 PE=1 SV=1									50.02	1	1	6.8					52.13	1	2	3.2					1	2	3	2
L0N7N1	Kinesin-like protein KIF14 OS=Mus musculus GN=Kif14 PE=1 SV=1									50.02	1	1	1.9					52.13	1	2	2.1					1	2	3	2
Q9QYS9	Protein quaking OS=Mus musculus GN=Qki PE=1 SV=1	71.44	1	2	11.1					29.73	1	1	2.3													3	2	1	2
E9Q8L9	Rab11 family-interacting protein 1 OS=Mus musculus GN=Rab11fip1 PE=1 SV=1									73.85	2	2	2.5					251.77	5	7	7.2	89.47	2	3	3.8	1	3	2	2
D3YU96	Cytohesin-2 OS=Mus musculus GN=Cyth2 PE=1 SV=1																	100.46	2	3	11.2					1	1	4	2
P10287	Cadherin-3 OS=Mus musculus GN=Cdh3 PE=1 SV=2									32.65	1	1	1.9					66.09	2	2	4.4					1	2	3	2
Q9ERH4	Nucleolar and spindle-associated protein 1 OS=Mus musculus GN=Nusap1 PE=1 SV=1									36.6	1	2	11.5					61	1	1	2.3					1	3	2	2
Q5SQ20	Pescadillo homolog OS=Mus musculus GN=Pes1 PE=1 SV=1									61.57	2	2	4.3					33.49	1	1	2.9					1	3	2	2
B8QI36	Liprin-alpha 4 OS=Mus musculus GN=Ppfia4 PE=1 SV=1									93.7	2	3	6.1													1	4	1	2
D3YWB8	Ribosomal protein S6 kinase beta-2 OS=Mus musculus GN=Rps6kb2 PE=1 SV=1									28.29	1	2	5.4					65.39	1	1	3.3					1	3	2	2
E9Q8D0	Protein Dnajc21 OS=Mus musculus GN=Dnajc21 PE=1 SV=1																	93.49	2	3	5.3					1	1	4	2
Q8C4J7	Transducin beta-like protein 3 OS=Mus musculus GN=Tbl3 PE=2 SV=1									44.88	1	2	5.1					132.51	2	3	5.4	36.22	1	1	1.6	1	3	2	2
Q8C3I8	Protein HGH1 homolog OS=Mus musculus GN=Hgh1 PE=1 SV=1									59.36	1	1	5.3					32.17	1	2	8.7					1	2	3	2
P26039	Talin-1 OS=Mus musculus GN=Tln1 PE=1 SV=2																	90.58	2	3	3					1	1	4	2
Q8BHN1	Gamma-taxilin OS=Mus musculus GN=Txlng PE=1 SV=1									126.82	3	3	6.5					157.64	3	3	8.8	84.88	2	3	9.2	1	4	1	2
A0A0A0MQE5	Calmodulin-regulated spectrin-associated protein 1 OS=Mus musculus GN=Camsap1 PE=1 SV=1									85.45	2	3	2.8													1	4	1	2
Q9DCT5	Stromal cell-derived factor 2 OS=Mus musculus GN=Sdf2 PE=1 SV=1									53.1	1	2	22.3					31.82	1	1	11.4					1	3	2	2
A6PW47	Mediator of RNA polymerase II transcription subunit 24 OS=Mus musculus GN=Med24 PE=1 SV=1																	84.16	2	3	4.5					1	1	4	2
E9Q106	SPATS2-like protein (Fragment) OS=Mus musculus GN=Spats2l PE=1 SV=1									83.01	2	3	17.6													1	4	1	2
A2BI12	PC4 and SFRS1-interacting protein OS=Mus musculus GN=Psip1 PE=1 SV=1									82.46	2	3	13.1													1	4	1	2
A0A0J9YTU6	Probable 28S rRNA (cytosine-C(5))-methyltransferase (Fragment) OS=Mus musculus GN=Nsun5 PE=1 SV=1									82.24	2	3	37.3													1	4	1	2
B1ATI0	Aldehyde dehydrogenase OS=Mus musculus GN=Aldh3a2 PE=1 SV=1	43.92	1	2	7.9					38.22	1	1	3.4													3	2	1	2
E9PX27	Heat shock protein HSP 90-beta OS=Mus musculus GN=Hsp90ab1 PE=1 SV=1	79.68	1	3	40.2																					4	1	1	2
Q6P9R1	ATP-dependent RNA helicase DDX51 OS=Mus musculus GN=Ddx51 PE=1 SV=1									52.39	1	1	3					27.29	1	2	4.5					1	2	3	2
T1ECW4	RNA-binding protein with multiple-splicing OS=Mus musculus GN=Rbpms PE=1 SV=1									76.06	2	3	24.1													1	4	1	2
A0A0A6YWH2	Allograft inflammatory factor 1-like OS=Mus musculus GN=Aif1l PE=1 SV=1									33.64	1	1	7.4					41.65	1	2	24.3					1	2	3	2
P62196	26S protease regulatory subunit 8 OS=Mus musculus GN=Psmc5 PE=1 SV=1									74.17	1	3	10.6													1	4	1	2
Q9DAP7	Histone chaperone ASF1B OS=Mus musculus GN=Asf1b PE=1 SV=1									74.08	2	3	21.3													1	4	1	2
Q9D0D3	Poly(A) RNA polymerase, mitochondrial OS=Mus musculus GN=Mtpap PE=1 SV=1									73.73	2	3	10.1													1	4	1	2
Q56A08	G patch domain and KOW motifs-containing protein OS=Mus musculus GN=Gpkow PE=1 SV=2									36.18	1	1	4.5					37	1	2	6.8					1	2	3	2
A2AE32	Guanine nucleotide-binding protein G(t) subunit alpha-2 (Fragment) OS=Mus musculus GN=Gnat2 PE=4 SV=1	72.58	1	3	11.2																					4	1	1	2
Q3ULN2	General transcription factor IIB OS=Mus musculus GN=Gtf2b PE=1 SV=1									72.11	2	3	12.7													1	4	1	2
Q9CQE6	Histone chaperone ASF1A OS=Mus musculus GN=Asf1a PE=1 SV=1									71.84	2	3	16.7													1	4	1	2
Q9CS74	Protein ecdysoneless homolog OS=Mus musculus GN=Ecd PE=1 SV=2									147.98	2	3	7	65.65	1	1	2.8	58.76	1	2	4.8					1	2	3	2
E9Q9E0	Calcium uptake protein 1, mitochondrial (Fragment) OS=Mus musculus GN=Micu1 PE=1 SV=1									70.1	2	3	17.9													1	4	1	2
D3YTQ5	Acyl-CoA dehydrogenase family member 11 OS=Mus musculus GN=Acad11 PE=1 SV=1									69.52	1	3	8.3													1	4	1	2
Q3V0K9	Plastin-1 OS=Mus musculus GN=Pls1 PE=1 SV=1																	68.9	2	3	3.5					1	1	4	2
F8WIK5	Pleckstrin homology domain-containing family A member 2 (Fragment) OS=Mus musculus GN=Plekha2 PE=1 SV=6																	67.17	1	3	10.1					1	1	4	2
Q8BGS1	Band 4.1-like protein 5 OS=Mus musculus GN=Epb41l5 PE=1 SV=1									49.29	1	2	3.1					97.42	2	5	10.1	40.01	1	2	3.1	1	3	2	2
Q5SSK3	Transcription elongation factor, mitochondrial OS=Mus musculus GN=Tefm PE=1 SV=1									30.33	1	2	6.9					35.79	1	1	3.6					1	3	2	2
B2RQC7	DIP2 disco-interacting protein 2 homolog B (Drosophila) OS=Mus musculus GN=Dip2b PE=1 SV=1																	64.92	2	3	2.4					1	1	4	2
A2A8V9	Serine/arginine repetitive matrix protein 1 OS=Mus musculus GN=Srrm1 PE=1 SV=1																	64.37	1	3	9					1	1	4	2
Q7TMF2	3~-5~ exoribonuclease 1 OS=Mus musculus GN=Eri1 PE=1 SV=2	52.31	1	2	11.6	45.04	1	2	13.3	98.92	2	3	15.7													1	4	1	2
Q3TIX9	U4/U6.U5 tri-snRNP-associated protein 2 OS=Mus musculus GN=Usp39 PE=1 SV=2									61.98	2	3	8.2													1	4	1	2
Q540I4	Flotillin 1 OS=Mus musculus GN=Flot1 PE=1 SV=1	61.26	1	3	8.4																					4	1	1	2
Q61171	Peroxiredoxin-2 OS=Mus musculus GN=Prdx2 PE=1 SV=3	59.29	1	2	14.1	51.44	1	2	14.6	162.32	3	3	14.6					167.51	4	5	27.8	122.75	3	5	27.8	1	4	1	2
Q8BFY9	Transportin-1 OS=Mus musculus GN=Tnpo1 PE=1 SV=2																	59.26	2	3	4.2					1	1	4	2
E9PZ73	Transcriptional enhancer factor TEF-1 OS=Mus musculus GN=Tead1 PE=1 SV=1	58.34	1	3	7																					4	1	1	2
Q80WS3	rRNA/tRNA 2~-O-methyltransferase fibrillarin-like protein 1 OS=Mus musculus GN=Fbll1 PE=2 SV=1	42.23	1	3	7	48.06	1	1	3.8	38.23	1	1	3.5	28.38	1	1	3.5	119.56	2	2	7					2	1	3	2
B2KF10	BTB/POZ domain-containing protein KCTD20 (Fragment) OS=Mus musculus GN=Kctd20 PE=4 SV=1	37.5	1	1	4.5					40.08	1	1	4.5	38.55	1	1	4.5	51.75	1	2	9.4					2	1	3	2
Q8BQM8	Echinoderm microtubule-associated protein-like 5 OS=Mus musculus GN=Eml5 PE=2 SV=2									27.82	1	1	1.6					29.8	1	2	2					1	2	3	2
F6TVX7	Protein Gm20671 (Fragment) OS=Mus musculus GN=Gm20671 PE=4 SV=1									56.75	2	3	6.6													1	4	1	2
Q3UV71	Transmembrane and TPR repeat-containing protein 1 OS=Mus musculus GN=Tmtc1 PE=2 SV=2									26.57	1	2	1.6					29.47	1	1	2.4					1	3	2	2
A2ADA5	tRNA pseudouridine synthase-like 1 OS=Mus musculus GN=Pusl1 PE=1 SV=1									55.26	1	3	7.6													1	4	1	2
Q8BHS6	Armadillo repeat-containing X-linked protein 3 OS=Mus musculus GN=Armcx3 PE=1 SV=1									55.2	1	3	9													1	4	1	2
Q9CQQ4	Gem-associated protein 2 OS=Mus musculus GN=Gemin2 PE=2 SV=1	60.13	1	2	7.1	37.71	1	2	9.7	61.71	1	3	16.7													1	4	1	2
D3YUP1	Histone-arginine methyltransferase CARM1 OS=Mus musculus GN=Carm1 PE=1 SV=1																	52.46	1	3	5.7					1	1	4	2
A2BI84	Transcription factor COE4 OS=Mus musculus GN=Ebf4 PE=3 SV=1																	52.07	1	3	6.2					1	1	4	2
Q60592	Microtubule-associated serine/threonine-protein kinase 2 OS=Mus musculus GN=Mast2 PE=1 SV=1																	45.59	1	3	2					1	1	4	2
Q6RHR9	Membrane-associated guanylate kinase, WW and PDZ domain-containing protein 1 OS=Mus musculus GN=Magi1 PE=1 SV=1	44.42	1	3	2.7																					4	1	1	2
Q8CFJ9	WD repeat-containing protein 24 OS=Mus musculus GN=Wdr24 PE=1 SV=1	41.67	1	3	4.3																					4	1	1	2
Q0VBD2	Protein MCM10 homolog OS=Mus musculus GN=Mcm10 PE=1 SV=1																	41.61	1	3	6.4					1	1	4	2
Q3UXL9	Cyclin-C OS=Mus musculus GN=Ccnc PE=1 SV=1	41.47	1	3	13.2																					4	1	1	2
A2AQA7	Intron-binding protein aquarius OS=Mus musculus GN=Aqr PE=1 SV=1	41.37	1	3	4.6																					4	1	1	2
Q543H2	Zinc finger protein 36, C3H type-like 1 OS=Mus musculus GN=Zfp36l1 PE=1 SV=1									40.25	1	3	10.4													1	4	1	2
A2AAN0	Exocyst complex component 7 OS=Mus musculus GN=Exoc7 PE=1 SV=1									39.98	1	3	6.6													1	4	1	2
F6XIG5	Coatomer subunit epsilon (Fragment) OS=Mus musculus GN=Cope PE=1 SV=1									39.12	1	3	36.2													1	4	1	2
Q9DBB4	N-alpha-acetyltransferase 16, NatA auxiliary subunit OS=Mus musculus GN=Naa16 PE=2 SV=1																	38.56	1	3	6.4					1	1	4	2
Q921D4	Mediator of RNA polymerase II transcription subunit 6 OS=Mus musculus GN=Med6 PE=1 SV=2	38.42	1	3	10.6																					4	1	1	2
Q8R2P8	Lysine--tRNA ligase OS=Mus musculus GN=Kars PE=1 SV=1	38.06	1	3	5.1																					4	1	1	2
D3Z3G6	Mitogen-activated protein kinase OS=Mus musculus GN=Mapk3 PE=1 SV=1																	37.98	1	3	10.8					1	1	4	2
Q3UIL6	Pleckstrin homology domain-containing family A member 7 OS=Mus musculus GN=Plekha7 PE=1 SV=2																	37.11	1	3	4.1					1	1	4	2
Q5NC03	LIM domain kinase 2 OS=Mus musculus GN=Limk2 PE=1 SV=1									35.91	1	3	8.2													1	4	1	2
P97360	Transcription factor ETV6 OS=Mus musculus GN=Etv6 PE=1 SV=1																	35.21	1	3	6.4					1	1	4	2
Q7M6Y6	Maestro heat-like repeat-containing protein family member 2B OS=Mus musculus GN=Mroh2b PE=2 SV=2	34.94	1	3	2.5																					4	1	1	2
O88845	A-kinase anchor protein 10, mitochondrial OS=Mus musculus GN=Akap10 PE=1 SV=3									43.08	1	1	2.4	31.83	1	1	4.2	37.96	1	3	6					1	1	4	2
Q8BZQ7	Anaphase-promoting complex subunit 2 OS=Mus musculus GN=Anapc2 PE=1 SV=2	66.89	1	2	3.6	69.68	1	1	2.4	36.31	1	2	3.6					74.76	2	2	4.3	27.65	1	1	0.8	1.5	3	1.5	2
F6S5Z6	Serine/threonine-protein kinase MRCK alpha (Fragment) OS=Mus musculus GN=Cdc42bpa PE=1 SV=1																	32.47	1	3	6.1					1	1	4	2
Q3UQ84	Threonine--tRNA ligase, mitochondrial OS=Mus musculus GN=Tars2 PE=1 SV=1									32.32	1	3	5.4													1	4	1	2
A0A0B4J1F9	Protein Tchh OS=Mus musculus GN=Tchh PE=4 SV=1									32.03	1	3	4.2													1	4	1	2
H7BX33	Protein 4933434E20Rik OS=Mus musculus GN=4933434E20Rik PE=1 SV=1									31.99	1	3	14.5													1	4	1	2
G3XA30	MCG1618, isoform CRA_c OS=Mus musculus GN=Nsmce4a PE=1 SV=1									37.83	1	3	9.7					49.86	1	2	5.2	38.02	1	2	5.2	1	4	1	2
Q91XH6	Vesicle transport through interaction with t-SNAREs 1B homolog OS=Mus musculus GN=Vti1b PE=1 SV=1									31.63	1	3	23.3													1	4	1	2
A0A0A0MQM3	NADH-cytochrome b5 reductase 3 (Fragment) OS=Mus musculus GN=Cyb5r3 PE=1 SV=4									90.7	1	3	25.2	116.89	1	1	11.9	111.91	1	2	21.7					1	2	3	2
B1AVZ0	Uracil phosphoribosyltransferase homolog OS=Mus musculus GN=Uprt PE=1 SV=1									31.18	1	3	8.1													1	4	1	2
Q5NC05	Transcription termination factor 2 OS=Mus musculus GN=Ttf2 PE=1 SV=2																	30.67	1	3	5.4					1	1	4	2
O08715	A-kinase anchor protein 1, mitochondrial OS=Mus musculus GN=Akap1 PE=1 SV=4																	29.69	1	3	7.4					1	1	4	2
A2RSY6	TRMT1-like protein OS=Mus musculus GN=Trmt1l PE=1 SV=1																	28.95	1	3	2.7					1	1	4	2
Q6PFR5	Transformer-2 protein homolog alpha OS=Mus musculus GN=Tra2a PE=1 SV=1	79.15	1	2	8.5	68.22	1	1	5	88.68	1	2	8.2	83.4	1	1	5	77.59	2	2	8.2					1.5	1.5	3	2
D3YVF0	A-kinase anchor protein 5 OS=Mus musculus GN=Akap5 PE=1 SV=2									28.64	1	3	9													1	4	1	2
Q8BVP5	Casein kinase I isoform gamma-2 OS=Mus musculus GN=Csnk1g2 PE=1 SV=1									28.21	1	3	7.2													1	4	1	2
Q3UFB2	Box C/D snoRNA protein 1 OS=Mus musculus GN=Znhit6 PE=1 SV=2									28.08	1	3	12.4													1	4	1	2
Q9CX34	Protein SGT1 homolog OS=Mus musculus GN=Sugt1 PE=1 SV=3																	27.09	1	3	6.3					1	1	4	2
P49135	TFIIH basal transcription factor complex helicase XPB subunit OS=Mus musculus GN=Ercc3 PE=2 SV=1									26.93	1	3	4													1	4	1	2
P0C6F1	Dynein heavy chain 2, axonemal OS=Mus musculus GN=Dnah2 PE=1 SV=1									26.8	1	3	1.3													1	4	1	2
P62878	E3 ubiquitin-protein ligase RBX1 OS=Mus musculus GN=Rbx1 PE=1 SV=1									42.57	1	3	24.1					33.36	1	1	7.4	35.16	1	1	7.4	1	4	1	2
Q3U573	Dolichyl-diphosphooligosaccharide--protein glycosyltransferase subunit STT3A OS=Mus musculus GN=Stt3a PE=1 SV=1									26.66	1	3	4.4													1	4	1	2
Q3UIX4	Protein Srsf11 OS=Mus musculus GN=Srsf11 PE=1 SV=1									38.24	1	2	6.5	69.14	2	2	6.5	83.64	2	3	9.2					1	1	4	2
Q8K2F8	Protein LSM14 homolog A OS=Mus musculus GN=Lsm14a PE=1 SV=1									88.59	2	3	12.3					50.55	1	2	11.5	100.69	1	2	7.1	1	4	1	2
P62827	GTP-binding nuclear protein Ran OS=Mus musculus GN=Ran PE=1 SV=3	36.1	1	3	19.9					150.79	3	4	21.3	141.98	3	4	22.2									4	1	1	2
Q8BHE0	Proline-rich protein 11 OS=Mus musculus GN=Prr11 PE=2 SV=1	39.39	1	3	9.5													41.23	1	1	3.3	55.32	1	1	5.2	4	1	1	2
Q8BG67	Protein EFR3 homolog A OS=Mus musculus GN=Efr3a PE=1 SV=1									34.88	1	3	5.9	48.61	1	1	2.7	28.46	1	2	2.7					1	2	3	2
Q9CZU3	Superkiller viralicidic activity 2-like 2 OS=Mus musculus GN=Skiv2l2 PE=1 SV=1	157	3	5	7.1	93.8	2	3	5.3	445.56	10	15	21.9	126.01	3	10	14.3	245.1	5	11	13.5	173.64	3	3	5.2	1.5	1.45455	3	1.98485
P50580	Proliferation-associated protein 2G4 OS=Mus musculus GN=Pa2g4 PE=1 SV=3	955.93	16	28	60.4	463.38	9	10	32	1393.48	24	32	61.4	886.97	16	20	53.6	1264.17	21	28	63.7	665.82	12	16	46.7	2.63636	1.57143	1.70588	1.97122
Q9CU62	Structural maintenance of chromosomes protein 1A OS=Mus musculus GN=Smc1a PE=1 SV=4	437.73	9	18	19.3	219.37	4	12	15	559.13	13	18	16.1	186.03	5	6	6.7	349.72	7	11	10.9	191.89	4	6	8.6	1.46154	2.71429	1.71429	1.96337
Q8BH59	Calcium-binding mitochondrial carrier protein Aralar1 OS=Mus musculus GN=Slc25a12 PE=1 SV=1	134.68	3	5	7.7	208.7	4	8	12.4	58.22	2	4	9									29.49	1	4	6.9	0.666667	5	0.2	1.95556
B2RQE8	Rho GTPase-activating protein 42 OS=Mus musculus GN=Arhgap42 PE=1 SV=1	35.84	1	5	9.4	91.5	2	6	8									115.64	3	3	5.6					0.857143	1	4	1.95238
Q6DVA0	LEM domain-containing protein 2 OS=Mus musculus GN=Lemd2 PE=1 SV=1	188.19	4	5	11.9	180.11	4	6	16.8	104.25	2	3	13.7													0.857143	4	1	1.95238
B9EIZ7	Coronin OS=Mus musculus GN=Coro6 PE=1 SV=1	163.52	3	5	4.2	168.94	3	6	4.2	73.49	2	3	4.2													0.857143	4	1	1.95238
S4R2G5	Glyceraldehyde-3-phosphate dehydrogenase OS=Mus musculus GN=Gapdhs PE=1 SV=1	112.26	1	3	10.7					97.49	1	1	5.9	151.77	2	3	5.9	111.82	1	3	5.9	136.49	2	2	5.9	4	0.5	1.33333	1.94444
Q8QZX2	HAUS augmin-like complex subunit 3 OS=Mus musculus GN=Haus3 PE=1 SV=1									153.34	4	10	25.6	84.39	2	2	7.4	82	2	6	17.4	139.06	4	5	12.5	1	3.66667	1.16667	1.94444
Q9DBN5	Lon protease homolog 2, peroxisomal OS=Mus musculus GN=Lonp2 PE=1 SV=1					108.31	2	2	3.6	63.75	2	3	5.9					54.61	1	2	2.9	36.27	1	1	2.2	0.333333	4	1.5	1.94444
Q3UGC7	Eukaryotic translation initiation factor 3 subunit J-A OS=Mus musculus GN=Eif3j1 PE=2 SV=1	252.92	4	7	30.7	213.45	4	6	19.5	63.92	1	3	15.3					122.24	2	3	14.9	229	4	5	23	1.14286	4	0.666667	1.93651
Q499E4	Zinc finger protein DZIP1L OS=Mus musculus GN=Dzip1l PE=1 SV=1	43.19	1	2	4.3					119.99	2	3	7.6	59.69	1	1	4	44.69	1	6	9.3	206.2	4	8	14.2	3	2	0.777778	1.92593
Q4FJX1	Importin subunit alpha OS=Mus musculus GN=Kpna4 PE=1 SV=1	51.48	1	3	6.1					249.42	4	5	15.7	124.34	3	4	10.4	103.87	2	3	7.7	93.86	3	6	16.7	4	1.2	0.571429	1.92381
Q8VEB2	Protein salvador homolog 1 OS=Mus musculus GN=Sav1 PE=1 SV=2					56.4	1	5	14.8	77.34	2	4	10.9					51.42	1	2	7.5	96.84	3	4	17.6	0.166667	5	0.6	1.92222
Q62036	Centrosomal protein of 131 kDa OS=Mus musculus GN=Cep131 PE=1 SV=2													32.82	1	3	4.1	127.54	3	8	8.9	36.89	1	1	3.9	1	0.25	4.5	1.91667
Q99P88	Nuclear pore complex protein Nup155 OS=Mus musculus GN=Nup155 PE=1 SV=1	76.24	2	2	2.9					385.15	7	13	12.6	325.73	6	9	8.6	461.22	10	16	16.8	285.81	7	12	10.9	3	1.4	1.30769	1.90256
P14576	Signal recognition particle 54 kDa protein OS=Mus musculus GN=Srp54 PE=1 SV=2	356.01	8	11	30	75.18	1	7	15.7	279.99	7	12	20.6	130.17	3	4	8.9	252.84	6	7	14.9	100.88	2	4	13.1	1.5	2.6	1.6	1.9
Q921M3	Splicing factor 3B subunit 3 OS=Mus musculus GN=Sf3b3 PE=1 SV=1	319.5	6	12	11.5	208.96	4	8	9	236.68	6	9	7.9	31.23	1	3	3.7	157.57	3	6	6	90.15	2	3	3.2	1.44444	2.5	1.75	1.89815
A0A087WNU6	Leucine-rich repeat flightless-interacting protein 1 (Fragment) OS=Mus musculus GN=Lrrfip1 PE=1 SV=1	162.46	3	4	11.8	80.48	1	2	6.3									98.47	2	2	4					1.66667	1	3	1.88889
Q99P69	Kinetochore protein Nuf2 OS=Mus musculus GN=Nuf2 PE=1 SV=2	37.23	1	2	8					100.84	2	4	11.9	45.01	1	2	6.7									3	1.66667	1	1.88889
D3YZC9	Splicing factor 1 OS=Mus musculus GN=Sf1 PE=1 SV=1	60.46	1	2	5.6					98.04	3	4	12.8	48.16	1	2	6	59.73	1	1	7.2	44.82	1	1	5.1	3	1.66667	1	1.88889
Q9CWT6	Probable ATP-dependent RNA helicase DDX28 OS=Mus musculus GN=Ddx28 PE=2 SV=2									193.97	3	6	14.1	33.72	1	1	2	153.58	3	6	11.3	137.22	3	5	9.8	1	3.5	1.16667	1.88889
A0A0J9YUR2	Cytospin-B OS=Mus musculus GN=Specc1 PE=1 SV=1	168.35	4	9	15.1	86.83	2	5	7	28.37	1	2	4.4													1.66667	3	1	1.88889
Q9Z2N8	Actin-like protein 6A OS=Mus musculus GN=Actl6a PE=1 SV=2	77.75	1	1	7	64.81	1	2	6.8	80.87	2	3	8.2													0.666667	4	1	1.88889
Q3TKV1	26S proteasome non-ATPase regulatory subunit 2 OS=Mus musculus GN=Psmd2 PE=1 SV=1									43.52	1	2	3					215.32	4	4	6.3	143.01	2	2	3	1	3	1.66667	1.88889
Q8K4Q8	Collectin-12 OS=Mus musculus GN=Colec12 PE=1 SV=1	49.12	1	4	5.4	54.67	1	2	2.6	47.35	1	2	2.6													1.66667	3	1	1.88889
P62274	40S ribosomal protein S29 OS=Mus musculus GN=Rps29 PE=3 SV=2	79.31	2	3	46.4					190.87	5	5	46.4	188.86	4	5	46.4	138.86	3	3	33.9	147.73	4	5	46.4	4	1	0.666667	1.88889
G3UW82	MCG140437, isoform CRA_d OS=Mus musculus GN=Myh2 PE=1 SV=1	59.92	1	2	2.4					62.76	1	1	2	81.89	2	2	2.7	56.75	1	1	1.5					3	0.666667	2	1.88889
Q3V3P1	DNA topoisomerase OS=Mus musculus GN=Top3a PE=1 SV=1	62.67	1	1	2.7	95.86	2	2	5.1	65.62	1	2	3.8					49.95	1	1	3.6					0.666667	3	2	1.88889
A0A0J9YU32	60S ribosomal protein L6 (Fragment) OS=Mus musculus GN=Rpl6 PE=1 SV=1	202.96	2	3	29.7	207.52	2	2	29.7	104.33	1	2	40.5					205.28	3	3	32.4	120.32	2	2	32.4	1.33333	3	1.33333	1.88889
Q8BL48	RING finger protein unkempt homolog OS=Mus musculus GN=Unk PE=1 SV=1	61.79	1	3	7.9					142.8	3	4	7.7	37.1	1	5	8.5	52.9	1	4	7	130.18	4	5	8.5	4	0.833333	0.833333	1.88889
Q00547	Hyaluronan mediated motility receptor OS=Mus musculus GN=Hmmr PE=1 SV=4	1143.21	16	24	38.4	597.73	10	12	22.4	1199.63	19	24	41.6	441.84	7	10	18.6	1133.33	19	24	38.5	635.88	11	16	29	1.92308	2.27273	1.47059	1.8888
E9PZW8	Unconventional myosin-IXb OS=Mus musculus GN=Myo9b PE=1 SV=1	156.83	3	6	3.7	352.73	7	10	6.1	27.86	1	3	1.5													0.636364	4	1	1.87879
F8WGR0	Alpha-adducin OS=Mus musculus GN=Add1 PE=1 SV=1	351.29	5	8	17.6	306.21	5	7	13	331.84	6	8	16.9	117.95	2	2	3.9	237.64	5	5	13	82.71	2	3	5.7	1.125	3	1.5	1.875
Q91YQ5	Dolichyl-diphosphooligosaccharide--protein glycosyltransferase subunit 1 OS=Mus musculus GN=Rpn1 PE=1 SV=1	158.74	3	9	16.6	347.1	7	10	21.2	643.08	12	22	45.1	248.55	4	7	13.7	367.42	6	10	23.7	125.74	2	5	16.8	0.909091	2.875	1.83333	1.87247
Q01320	DNA topoisomerase 2-alpha OS=Mus musculus GN=Top2a PE=1 SV=2	176.45	3	7	5.6	43.1	1	4	4.1	39.7	1	2	2													1.6	3	1	1.86667
Q08288	Cell growth-regulating nucleolar protein OS=Mus musculus GN=Lyar PE=1 SV=2	138.22	2	4	10.6	124.15	2	3	11.3					35.6	1	2	7.7	123.72	3	3	7.7					1.25	0.333333	4	1.86111
E9Q238	Protein Kank1 OS=Mus musculus GN=Kank1 PE=1 SV=1	546.43	11	13	11.3	207.86	3	8	10.7	44.94	1	2	2.9					98.36	2	3	3.2	84.84	2	3	2.9	1.55556	3	1	1.85185
Q91WR3	Activating signal cointegrator 1 complex subunit 2 OS=Mus musculus GN=Ascc2 PE=1 SV=1	264.1	5	13	18.8	179.65	3	9	14	199.3	5	8	12.4	35.44	1	2	4.3	181.87	5	8	10.3	253.6	5	7	12	1.4	3	1.125	1.84167
Q08509	Epidermal growth factor receptor kinase substrate 8 OS=Mus musculus GN=Eps8 PE=1 SV=2	681.1	10	17	29.1	261.2	4	5	9.9	429.57	7	8	18.9	212.26	4	8	18.4	609.2	10	14	28.4	184.13	4	9	18.6	3	1	1.5	1.83333
A2AKJ9	Syntenin-1 OS=Mus musculus GN=Sdcbp PE=1 SV=1													30.49	1	1	16.6	124.68	3	3	28.6					1	0.5	4	1.83333
Q3ULL6	Protein Upf3b OS=Mus musculus GN=Upf3b PE=1 SV=1	40.46	1	2	4.2	118.4	2	5	14.4	121.65	3	3	7.4					125.9	3	3	9.1	26.2	1	3	7.6	0.5	4	1	1.83333
Q9DBR0	A-kinase anchor protein 8 OS=Mus musculus GN=Akap8 PE=1 SV=1	46.32	1	1	2					56.09	1	2	8.4									37.29	1	1	1.6	2	3	0.5	1.83333
Q8C5Q4	G-rich sequence factor 1 OS=Mus musculus GN=Grsf1 PE=1 SV=2	49.71	1	2	5.8					291.05	5	5	12.1	120.58	2	3	10.4	144.71	3	4	15.2	152.82	3	4	14.4	3	1.5	1	1.83333
E9PYQ1	Transforming growth factor beta-1-induced transcript 1 protein OS=Mus musculus GN=Tgfb1i1 PE=1 SV=1	40.34	1	1	2.3	38.68	1	1	2.3					40.83	1	1	2.3	122.33	3	3	8					1	0.5	4	1.83333
F6VQH5	Heterogeneous nuclear ribonucleoprotein D-like (Fragment) OS=Mus musculus GN=Hnrnpdl PE=1 SV=1	205.84	4	5	22.6	147.27	3	5	20.4	108.77	3	3	16.4									30.98	1	1	5.3	1	4	0.5	1.83333
Q9CX53	Gem-associated protein 6 OS=Mus musculus GN=Gemin6 PE=1 SV=2	41.05	1	2	15.7													72.59	1	2	15.7	59.98	1	1	7.8	3	1	1.5	1.83333
S4R1Y1	Cullin-9 OS=Mus musculus GN=Cul9 PE=1 SV=1	46.32	1	1	0.6					52.96	1	2	0.8									52.05	1	1	0.6	2	3	0.5	1.83333
Q4VGL6	Roquin-1 OS=Mus musculus GN=Rc3h1 PE=1 SV=1					45.31	1	1	1.9	35.15	1	2	3.1					50.54	1	1	1.2					0.5	3	2	1.83333
Q7TQK4	Exosome complex component RRP40 OS=Mus musculus GN=Exosc3 PE=1 SV=3									73.09	2	3	22.3									40.4	1	1	14.2	1	4	0.5	1.83333
F6W3U3	Protein 2310061I04Rik (Fragment) OS=Mus musculus GN=2310061I04Rik PE=1 SV=1					49.77	1	1	8.3	43.75	1	2	8.3					31.98	1	1	8.3					0.5	3	2	1.83333
Q99KG3	RNA-binding protein 10 OS=Mus musculus GN=Rbm10 PE=1 SV=1	53.93	1	3	4.6																	35.31	1	1	2.4	4	1	0.5	1.83333
A6H5Z3	Exocyst complex component 6B OS=Mus musculus GN=Exoc6b PE=1 SV=1					38.05	1	1	2.3	56.71	1	3	3.8													0.5	4	1	1.83333
E9PWN0	Phosphatidate phosphatase LPIN2 OS=Mus musculus GN=Lpin2 PE=1 SV=1	43.69	1	3	4									37.49	1	1	0.8									4	0.5	1	1.83333
Q9EPR5	VPS10 domain-containing receptor SorCS2 OS=Mus musculus GN=Sorcs2 PE=1 SV=2													34.08	1	1	1.5	28.63	1	3	3					1	0.5	4	1.83333
Q9CQ65	S-methyl-5~-thioadenosine phosphorylase OS=Mus musculus GN=Mtap PE=1 SV=1	43.34	1	1	3.5	167.07	3	3	12.4	79.57	2	3	9.9	84.2	2	3	15.9	63.2	1	3	8.8					0.5	1	4	1.83333
Q3UVJ7	2-4-dienoyl-Coenzyme A reductase 2, peroxisomal OS=Mus musculus GN=Decr2 PE=1 SV=1	46.23	1	3	14					42.31	1	2	10.6	85.85	2	3	17.5	65.37	1	2	10.6	135.44	3	3	10.6	4	0.75	0.75	1.83333
Q9QZE5	Coatomer subunit gamma-1 OS=Mus musculus GN=Copg1 PE=1 SV=1	50.68	1	2	5.1					401.62	8	13	20.4	361.31	8	10	11.3	369.8	8	11	16.2	281.24	6	9	11.9	3	1.27273	1.2	1.82424
Q9D7I8	Protein FAM83D OS=Mus musculus GN=Fam83d PE=2 SV=1	605.63	10	13	27.7	335.07	6	6	13.3	487.99	10	12	22.9	260.24	6	7	13.3	385.44	8	10	20	238.55	4	5	10.1	2	1.625	1.83333	1.81944
A2RSB1	Nucleosome assembly protein 1-like 4 OS=Mus musculus GN=Nap1l4 PE=1 SV=1	198.69	4	6	17.3	36.46	1	1	2.9	456.12	9	13	26.9	531.76	9	13	26.9	510.48	10	14	28.8	637.07	12	15	30.9	3.5	1	0.9375	1.8125
E9Q723	Protein Ttc13 OS=Mus musculus GN=Ttc13 PE=1 SV=1	50.67	1	6	13.7	37.96	1	3	5.1	164.22	4	7	10.7	29.66	1	2	1.9									1.75	2.66667	1	1.80556
Q8VI75	Importin-4 OS=Mus musculus GN=Ipo4 PE=1 SV=1									64.98	2	2	2.8					95.98	3	6	7.3	70.79	2	4	4.5	1	3	1.4	1.8
A0A0A6YXG1	Microtubule-associated serine/threonine-protein kinase 4 (Fragment) OS=Mus musculus GN=Mast4 PE=1 SV=1	45.87	1	3	3.1													45.59	1	1	1.5	55.3	2	4	2.2	4	1	0.4	1.8
O70318	Band 4.1-like protein 2 OS=Mus musculus GN=Epb41l2 PE=1 SV=2	43.74	1	1	2.3					78.31	2	6	9.6	28.46	1	3	4.1	309.84	8	12	16.8	113.73	3	7	12.2	2	1.75	1.625	1.79167
Q9CPN8	Insulin-like growth factor 2 mRNA-binding protein 3 OS=Mus musculus GN=Igf2bp3 PE=1 SV=1	702.85	12	19	38.9	334.53	6	9	18.5	676.29	11	15	34.7	339.16	5	6	15.5	651.24	11	12	29.9	443.31	9	11	22.8	2	2.28571	1.08333	1.78968
Q99K48	Non-POU domain-containing octamer-binding protein OS=Mus musculus GN=Nono PE=1 SV=3	897.05	17	23	45.2	708.72	11	27	50.5	397.15	12	16	28.1	119.8	3	5	10.1	676.45	15	19	35.5	266.42	7	11	26.2	0.857143	2.83333	1.66667	1.78571
E9QP99	Golgin subfamily A member 3 OS=Mus musculus GN=Golga3 PE=1 SV=1	39.66	1	6	6.8	662.11	12	19	18.8	33.36	1	3	4.1													0.35	4	1	1.78333
Q6A0D1	ER membrane protein complex subunit 2 (Fragment) OS=Mus musculus GN=Emc2 PE=1 SV=1					47.67	1	2	10.4	101.82	2	2	7.7					56.75	1	1	6.4					0.333333	3	2	1.77778
D3Z4D8	BRISC complex subunit Abro1 (Fragment) OS=Mus musculus GN=Fam175b PE=1 SV=2					41.62	1	2	10.7	29.74	1	1	6.2					97.15	2	2	9					0.333333	2	3	1.77778
Q99J95	Cyclin-dependent kinase 9 OS=Mus musculus GN=Cdk9 PE=1 SV=1					51.62	1	2	4.6	47.87	1	1	4.3					96.28	2	2	5.1					0.333333	2	3	1.77778
Q8K1R3	Polyribonucleotide nucleotidyltransferase 1, mitochondrial OS=Mus musculus GN=Pnpt1 PE=1 SV=1									64.32	2	6	7.9	32.7	1	2	2.6	59.67	2	5	6.9	34.13	1	2	2.2	1	2.33333	2	1.77778
Q3TXR9	Beta-hexosaminidase OS=Mus musculus GN=Hexb PE=1 SV=1	39.09	1	2	3.5									27.77	1	2	4.3	28.29	1	1	1.5					3	0.333333	2	1.77778
A0A0A6YVS2	Transmembrane and coiled-coil domain-containing protein 1 (Fragment) OS=Mus musculus GN=Tmco1 PE=1 SV=1					40.52	1	2	11	40.7	1	3	20.5	28.79	1	1	4	31.18	1	2	11					0.333333	2	3	1.77778
Q8BGF3	WD repeat-containing protein 92 OS=Mus musculus GN=Wdr92 PE=1 SV=1	36.8	1	1	3.4	49.84	1	2	9.2	228.39	5	7	31.7	38.69	1	2	11.5	111.2	3	3	14.8	25.74	1	1	2	0.666667	2.66667	2	1.77778
E9PXD2	Rho GTPase-activating protein 7 OS=Mus musculus GN=Dlc1 PE=1 SV=1									71.09	2	2	2.2					83.45	2	3	2.6	54.82	2	2	2.3	1	3	1.33333	1.77778
Q5PPR2	Exocyst complex component 1 OS=Mus musculus GN=Exoc1 PE=1 SV=1													32.71	1	2	5.1	113.13	2	3	4.3					1	0.333333	4	1.77778
A2AIX0	72 kDa inositol polyphosphate 5-phosphatase OS=Mus musculus GN=Inpp5e PE=1 SV=1	72.59	2	3	5.3	39.44	1	1	1.5	88.82	2	2	3									33.46	1	2	3	2	3	0.333333	1.77778
Q4VAA7	Sorting nexin-33 OS=Mus musculus GN=Snx33 PE=1 SV=1	43.1	1	2	3.5	37.52	1	2	3.5	106.96	2	2	4.4					77.84	1	3	7	81.37	2	2	6.4	1	3	1.33333	1.77778
Q6PHQ8	N-alpha-acetyltransferase 35, NatC auxiliary subunit OS=Mus musculus GN=Naa35 PE=1 SV=1									143.14	4	7	10.6	39.09	1	2	3.9	68.01	2	4	5.1	75.01	2	2	3.9	1	2.66667	1.66667	1.77778
Q4FZF3	Probable ATP-dependent RNA helicase DDX49 OS=Mus musculus GN=Ddx49 PE=2 SV=1	36.16	1	3	11.9	72.84	2	2	11.7	102.13	2	3	9.4	33.26	1	3	10.2	47.88	1	2	6.7					1.33333	1	3	1.77778
G3UYK9	Dystrobrevin beta (Fragment) OS=Mus musculus GN=Dtnb PE=1 SV=1									82.64	2	3	6.1									39.24	1	2	4.3	1	4	0.333333	1.77778
Q3V086	DEAD box polypeptide 4 OS=Mus musculus GN=Ddx4 PE=1 SV=1	208.45	3	3	4.5									85.65	2	2	3.8	107.62	2	3	8.7	140.2	3	3	3.8	4	0.333333	1	1.77778
Q9DCE5	p21-activated protein kinase-interacting protein 1 OS=Mus musculus GN=Pak1ip1 PE=1 SV=2	51.83	1	2	5.8	51.74	1	1	5.8	32.63	1	4	8.4	56.02	1	1	6	127.62	3	3	8.1	49	1	2	6	1.5	2.5	1.33333	1.77778
Q8CFE2	UPF0609 protein C4orf27 homolog OS=Mus musculus PE=1 SV=1	65.74	1	3	15									46.1	1	2	5.5									4	0.333333	1	1.77778
G3UZA4	Casein kinase II subunit beta (Fragment) OS=Mus musculus GN=Csnk2b PE=1 SV=6	35.63	1	2	18					96.48	2	2	23	127.75	2	2	25.4	140.27	3	3	32	96.1	2	2	25.4	3	1	1.33333	1.77778
Q91X84	CREB-regulated transcription coactivator 3 OS=Mus musculus GN=Crtc3 PE=1 SV=2									152.49	3	3	7.4					53.85	1	1	3.9	173.59	3	5	13.7	1	4	0.333333	1.77778
Q8BP22	Protein FAM92A1 OS=Mus musculus GN=Fam92a1 PE=1 SV=1					42.67	1	2	12.4									55.44	1	3	12.7					0.333333	1	4	1.77778
P02663	Alpha-S2-casein (Laboratory-Cont) OS=Bos taurus GN=CSN1S2 PE=1 SV=2					90.94	2	2	13.5									107.24	3	3	16.2					0.333333	1	4	1.77778
F8WH41	Striatin OS=Mus musculus GN=Strn PE=1 SV=1													28.45	1	2	4.9	36.23	1	3	7.3					1	0.333333	4	1.77778
Q8K1K2	26S protease regulatory subunit 8 OS=Mus musculus GN=Psmc5 PE=1 SV=1													102.1	1	2	12.9	111.49	1	3	12.1					1	0.333333	4	1.77778
A0A0G2JG52	Aurora kinase B OS=Mus musculus GN=Aim1 PE=1 SV=1	36.13	1	3	3.1																	37.13	1	2	1.1	4	1	0.333333	1.77778
P61406	Telomerase-binding protein EST1A OS=Mus musculus GN=Smg6 PE=1 SV=1	102.24	2	6	4.9	105.84	2	6	4.7	35.33	1	3	3.6									52.74	1	2	3.9	1	4	0.333333	1.77778
Q9R0U0	Serine/arginine-rich splicing factor 10 OS=Mus musculus GN=Srsf10 PE=1 SV=2					112.01	2	2	11.5	32.87	1	3	16.4													0.333333	4	1	1.77778
Q6KAR6	Exocyst complex component 3 OS=Mus musculus GN=Exoc3 PE=1 SV=2	39.15	1	2	5.4					210.85	3	9	15	159.36	3	6	10.1	186.1	4	7	11.3	227.31	4	8	13.1	3	1.42857	0.888889	1.77249
P26041	Moesin OS=Mus musculus GN=Msn PE=1 SV=3	1884.94	33	40	52.9	955	18	29	36.9	1364.9	28	35	47.3	544.7	12	15	22.2	724.18	17	24	33.1	363.04	8	14	26.3	1.36667	2.25	1.66667	1.76111
Q9D2E2	Target of EGR1 protein 1 OS=Mus musculus GN=Toe1 PE=1 SV=1	233.81	4	5	11.2	222.69	3	6	14.9	272.79	6	11	28	88.41	2	4	9.8	290.41	6	9	18.6	127.86	3	4	10.2	0.857143	2.4	2	1.75238
A2AQ19	RNA polymerase-associated protein RTF1 homolog OS=Mus musculus GN=Rtf1 PE=1 SV=1									27.58	1	4	7.7	30.26	1	3	4.8	39.15	1	2	4.2					1	1.25	3	1.75
F6UND7	Tyrosine-protein kinase OS=Mus musculus GN=Hck PE=1 SV=1	109.93	2	2	3.4					131.46	3	4	6.3	159.84	3	3	5	159.25	3	3	5	154.83	3	3	5	3	1.25	1	1.75
F6QCI0	Protein Taf15 (Fragment) OS=Mus musculus GN=Taf15 PE=1 SV=1	134.5	2	4	16.4	158.18	2	3	11.7	46.61	1	2	7.4													1.25	3	1	1.75
Q3TDT0	Tripartite motif-containing protein 3 OS=Mus musculus GN=Trim3 PE=1 SV=1					56.38	1	3	6.3									68.15	2	3	5.9					0.25	1	4	1.75
A2AFI3	RNA binding motif protein, X chromosome, isoform CRA_b OS=Mus musculus GN=Rbmx PE=1 SV=1									214.96	4	7	21.9	52.95	1	1	4.3					175.7	3	3	14.3	1	4	0.25	1.75
Q9D9K3	Cell death regulator Aven OS=Mus musculus GN=Aven PE=1 SV=2													129.62	2	3	11.4	106.17	2	3	14.3					1	0.25	4	1.75
Q99MR1	PERQ amino acid-rich with GYF domain-containing protein 1 OS=Mus musculus GN=Gigyf1 PE=1 SV=2									27.61	1	3	5.2									128.27	3	3	6.8	1	4	0.25	1.75
Q8BT07	Centrosomal protein of 55 kDa OS=Mus musculus GN=Cep55 PE=1 SV=2	655.69	12	19	44.4	256.37	4	9	25.3	1285.93	24	37	61	563.15	12	16	34.6	1160.66	22	25	48.7	1074.07	21	25	49.8	2	2.23529	1	1.7451
E9PWG6	Protein Ncapg OS=Mus musculus GN=Ncapg PE=1 SV=1	38.68	1	2	3.8	49.29	1	1	3.1	171.55	3	6	8.9	67.01	1	2	4.6	217.46	4	6	10	134.63	2	4	6.7	1.5	2.33333	1.4	1.74444
Q6QI06	Rapamycin-insensitive companion of mTOR OS=Mus musculus GN=Rictor PE=1 SV=2	230.95	5	10	7.1	179.07	4	8	5.8					31.38	1	1	1.3	27.75	1	6	4.5	28.19	1	1	1.1	1.22222	0.5	3.5	1.74074
Q3UHY8	ATP-binding cassette sub-family E member 1 OS=Mus musculus GN=Abce1 PE=1 SV=1	681.66	12	15	33.9	277.51	5	8	19.2	561.36	11	18	33.7	242.14	7	9	20.9	670.36	14	19	31.9	378.72	9	12	25	1.77778	1.9	1.53846	1.73875
P46460	Vesicle-fusing ATPase OS=Mus musculus GN=Nsf PE=1 SV=2									126.05	2	5	8.2	36.29	1	1	1.7	98.88	3	5	7.5	89.09	2	4	5.9	1	3	1.2	1.73333
Q8BHL3	TBC1 domain family member 10B OS=Mus musculus GN=Tbc1d10b PE=1 SV=2					60.43	1	4	11.3	116.34	3	4	6.9	39.55	1	4	7.8	41.37	1	3	9.8					0.2	1	4	1.73333
Q8CGY8	UDP-N-acetylglucosamine--peptide N-acetylglucosaminyltransferase 110 kDa subunit OS=Mus musculus GN=Ogt PE=1 SV=2					48.72	1	4	4.6	49.61	1	1	1.6					37.27	1	2	4.6					0.2	2	3	1.73333
Q2M4G9	E3 SUMO-protein ligase PIAS1 OS=Mus musculus GN=Pias1 PE=1 SV=1	71.77	1	2	3.4					174.37	4	4	9.4	134.43	2	4	10.6	162.11	3	5	12.3	163.92	3	4	8	3	1	1.2	1.73333
Q80YP0	Cyclin-dependent kinase 3 OS=Mus musculus GN=Cdk3 PE=1 SV=2									174.75	3	3	13.5									154.06	4	4	13.2	1	4	0.2	1.73333
Q3TT92	Dihydropyrimidinase-related protein 3 OS=Mus musculus GN=Dpysl3 PE=1 SV=1	43.57	1	3	5.5																	41.67	1	4	8.8	4	1	0.2	1.73333
E9Q0U7	Heat shock protein 105 kDa OS=Mus musculus GN=Hsph1 PE=1 SV=1					37.31	1	4	8.2									35.52	1	3	5.5					0.2	1	4	1.73333
Q569Z6	Thyroid hormone receptor-associated protein 3 OS=Mus musculus GN=Thrap3 PE=1 SV=1					48.82	1	4	7.4									38.71	1	3	3.6					0.2	1	4	1.73333
G3X960	MCG5982 OS=Mus musculus GN=Syde1 PE=1 SV=1									275.82	7	8	14.1	27.96	1	2	5.2	169.65	4	6	10	118.15	2	5	10.4	1	3	1.16667	1.72222
D3Z0A2	Protein arginine N-methyltransferase 1 OS=Mus musculus GN=Prmt1 PE=1 SV=1									89.95	3	6	21.1	28.6	1	1	4.4	28.24	1	1	4.4	29.95	1	2	7.9	1	3.5	0.666667	1.72222
Q8CCP0	Nuclear export mediator factor Nemf OS=Mus musculus GN=Nemf PE=1 SV=2	48.37	1	2	6	60.88	1	2	1.6	148.55	3	4	5.1	64.97	1	2	2.5	54.31	1	4	5.7	48.18	1	1	0.9	1	1.66667	2.5	1.72222
Q6P8N8	ATP-dependent Clp protease ATP-binding subunit clpX-like, mitochondrial OS=Mus musculus GN=Clpx PE=1 SV=1									317.42	8	10	21.5	42.97	1	2	3.7	93.22	2	3	6.3	263.09	6	7	14	1	3.66667	0.5	1.72222
Q0PD50	RAB8A, member RAS oncogene family, isoform CRA_a OS=Mus musculus GN=Rab8a PE=1 SV=1	47.14	1	2	8.7	50.12	1	1	9.2	36.93	1	1	8.2	87.59	2	2	16.4	45.35	1	2	13.5					1.5	0.666667	3	1.72222
Q8BJW6	Eukaryotic translation initiation factor 2A OS=Mus musculus GN=Eif2a PE=1 SV=2	291.84	5	14	39.4	466.42	9	12	32.4	544.93	11	17	38.7	282.31	7	8	19.6	359.4	9	13	30.3	143.3	3	6	15.1	1.15385	2	2	1.71795
E9Q3B1	RCC1 and BTB domain-containing protein 2 OS=Mus musculus GN=Rcbtb2 PE=1 SV=1					136.19	3	6	15.3	125.02	3	3	6.8													0.142857	4	1	1.71429
E9Q9T1	Leucine-rich repeat flightless-interacting protein 1 OS=Mus musculus GN=Lrrfip1 PE=1 SV=2	79.37	2	3	10.5									179.79	4	6	14.3									4	0.142857	1	1.71429
Q3UZ39	Leucine-rich repeat flightless-interacting protein 1 OS=Mus musculus GN=Lrrfip1 PE=1 SV=2	319.48	5	7	18.9	93.59	2	6	11.9	734.9	12	14	39.4	408.77	8	9	24.1	68.26	2	4	8	48.57	1	1	1.9	1.14286	1.5	2.5	1.71429
Q62219	Transforming growth factor beta-1-induced transcript 1 protein OS=Mus musculus GN=Tgfb1i1 PE=1 SV=2									33.64	1	3	5.4									79.06	2	7	20.4	1	4	0.125	1.70833
Q80VI1	E3 ubiquitin-protein ligase TRIM56 OS=Mus musculus GN=Trim56 PE=1 SV=1	255	4	7	17.3	181.55	3	6	12.5	322.61	6	10	24.4	40.56	1	3	7.5	216.96	4	10	21	269.24	5	8	16.3	1.14286	2.75	1.22222	1.70503
A2A7S7	Tyrosine--tRNA ligase OS=Mus musculus GN=Yars PE=1 SV=1					51.83	1	3	8.5	163.22	5	9	19	58.07	2	2	3.4	45.27	1	2	5	26.92	1	1	1.6	0.25	3.33333	1.5	1.69444
Q99L88	Beta-1-syntrophin OS=Mus musculus GN=Sntb1 PE=1 SV=4	43.77	1	2	8.2	95.57	2	3	8.2	70.07	2	2	4.5					55.85	2	3	9.3	40.96	1	2	4.5	0.75	3	1.33333	1.69444
G3UXA6	Polypyrimidine tract-binding protein 3 OS=Mus musculus GN=Ptbp3 PE=1 SV=1	485.09	9	13	31.2	376.97	7	7	12.3	443.92	9	12	27.3	219.45	4	6	18.6	469.7	10	15	29.6	353.68	7	10	22.6	1.75	1.85714	1.45455	1.68723
P08752	Guanine nucleotide-binding protein G(i) subunit alpha-2 OS=Mus musculus GN=Gnai2 PE=1 SV=5	783.52	12	18	49.3	195.1	3	5	17.5	1198.4	17	23	60.3	1208.7	20	26	60.6	1347.82	21	27	55.2	1456.29	24	27	63.7	3.16667	0.888889	1	1.68519
E9Q6R3	Vesicle-trafficking protein SEC22b OS=Mus musculus GN=Sec22b PE=1 SV=1									152.78	2	2	15.7													1	3	1	1.66667
A0A087WPL1	PDZ and LIM domain protein 2 OS=Mus musculus GN=Pdlim2 PE=1 SV=1									151.91	2	2	25													1	3	1	1.66667
Q8BH75	E3 ubiquitin-protein ligase NRDP1 OS=Mus musculus GN=Rnf41 PE=1 SV=1									107.16	1	1	6.9					29.76	1	1	6.9					1	2	2	1.66667
O35704	Serine palmitoyltransferase 1 OS=Mus musculus GN=Sptlc1 PE=1 SV=2									74.66	1	1	3					54.67	1	1	3					1	2	2	1.66667
P30677	Guanine nucleotide-binding protein subunit alpha-14 OS=Mus musculus GN=Gna14 PE=1 SV=2									70.29	1	1	5.1					51.81	1	1	6.8					1	2	2	1.66667
P14685	26S proteasome non-ATPase regulatory subunit 3 OS=Mus musculus GN=Psmd3 PE=1 SV=3									103.88	2	2	4.5					96.65	2	2	8.7	30.86	1	2	3.2	1	3	1	1.66667
Q3UNN4	SWI/SNF complex subunit SMARCC1 OS=Mus musculus GN=Smarcc1 PE=1 SV=1	80.79	1	1	4.6					33.17	1	1	0.6													2	2	1	1.66667
Q3URQ0	Testis-expressed sequence 10 protein OS=Mus musculus GN=Tex10 PE=1 SV=1									60.64	1	1	2.3					53.04	1	1	2.3					1	2	2	1.66667
Q9JIB4	General transcription factor IIH subunit 2 OS=Mus musculus GN=Gtf2h2 PE=1 SV=1									112.72	2	2	5.8													1	3	1	1.66667
Q4FJQ6	Serine (Or cysteine) peptidase inhibitor, clade B, member 6a, isoform CRA_a OS=Mus musculus GN=Serpinb6a PE=1 SV=1									52.94	1	1	2.1					52.22	1	1	2.1					1	2	2	1.66667
J3QNN8	MCG49140 OS=Mus musculus GN=Gm10263 PE=3 SV=1	53.74	1	1	30.4													48.61	1	1	30.4					2	1	2	1.66667
A2AM72	Kinesin-like protein OS=Mus musculus GN=Kif17 PE=1 SV=1									50.02	1	1	3					52.13	1	1	3					1	2	2	1.66667
O35066	Kinesin-like protein KIF3C OS=Mus musculus GN=Kif3c PE=1 SV=3									50.02	1	1	2.3					52.13	1	1	2.3					1	2	2	1.66667
Q3UHC4	Kinesin-like protein OS=Mus musculus GN=Kif3b PE=1 SV=1									50.02	1	1	3.1					52.13	1	1	5.6					1	2	2	1.66667
Q3V3Y6	Kinesin-like protein OS=Mus musculus GN=Kif9 PE=1 SV=1									50.02	1	1	2.1					52.13	1	1	2.1					1	2	2	1.66667
Q68FG3	Protein SPT2 homolog OS=Mus musculus GN=Spty2d1 PE=2 SV=1	45.78	1	1	2.8					54.44	1	1	1.8													2	2	1	1.66667
O70325	Phospholipid hydroperoxide glutathione peroxidase, mitochondrial OS=Mus musculus GN=Gpx4 PE=1 SV=4	98.44	2	2	15.7																					3	1	1	1.66667
Q76LV0	Glutathione peroxidase OS=Mus musculus GN=Gpx4 PE=1 SV=2	98.44	2	2	13.4																					3	1	1	1.66667
F6XS56	Protein Gm8444 OS=Mus musculus GN=Gm8444 PE=3 SV=1	38.28	1	1	16.9													57.65	1	1	15.3					2	1	2	1.66667
Q8VCG3	WD repeat-containing protein 74 OS=Mus musculus GN=Wdr74 PE=2 SV=1									186.66	4	5	16.4	37.98	1	2	6.5	89.82	2	5	21.9	37.87	1	2	5.2	1	2	2	1.66667
Q9JKK7	Tropomodulin-2 OS=Mus musculus GN=Tmod2 PE=1 SV=2	71.57	1	2	9.4					100.85	2	2	5.4	33.2	1	2	7.1									3	1	1	1.66667
Q9D7H3	RNA 3~-terminal phosphate cyclase OS=Mus musculus GN=RtcA PE=1 SV=2									136.55	2	2	6.6					117.69	2	2	6.6	70.23	1	2	9.3	1	3	1	1.66667
Q8BU33	Acetolactate synthase-like protein OS=Mus musculus GN=Ilvbl PE=1 SV=1									51.85	1	1	3.5					36.93	1	1	3.5					1	2	2	1.66667
Q923G2	DNA-directed RNA polymerases I, II, and III subunit RPABC3 OS=Mus musculus GN=Polr2h PE=1 SV=3									87.83	1	2	10.7													1	3	1	1.66667
A3KFX6	Protein argonaute-3 (Fragment) OS=Mus musculus GN=Ago3 PE=4 SV=1	86.62	1	2	18.6																					3	1	1	1.66667
Q9D1M7	Peptidyl-prolyl cis-trans isomerase FKBP11 OS=Mus musculus GN=Fkbp11 PE=1 SV=1									86.62	2	2	14.4													1	3	1	1.66667
Q8JZM0	Dimethyladenosine transferase 1, mitochondrial OS=Mus musculus GN=Tfb1m PE=1 SV=1									86.12	2	2	9.6													1	3	1	1.66667
P61620	Protein transport protein Sec61 subunit alpha isoform 1 OS=Mus musculus GN=Sec61a1 PE=1 SV=2	106.55	2	2	4.2	47.2	1	2	6.5	177.98	4	5	12.6	39.94	1	1	2.3									1	3	1	1.66667
Q3UNV7	Myeloid leukemia factor 2 OS=Mus musculus GN=Mlf2 PE=1 SV=1									67.24	1	2	4.9					75.94	1	1	4.9	26.84	1	1	4.9	1	3	1	1.66667
A2AGL3	Ryanodine receptor 3 OS=Mus musculus GN=Ryr3 PE=1 SV=1									34.52	1	1	0.7					47.68	1	1	0.9					1	2	2	1.66667
D3YUD2	Afadin (Fragment) OS=Mus musculus GN=Mllt4 PE=1 SV=1									81.63	1	2	15.7													1	3	1	1.66667
Q03145	Ephrin type-A receptor 2 OS=Mus musculus GN=Epha2 PE=1 SV=3									81.06	2	2	3.5													1	3	1	1.66667
Q3U3M5	Cyclin-K OS=Mus musculus GN=Ccnk PE=1 SV=1	43.74	1	1	4.3													36.99	1	1	4.3					2	1	2	1.66667
Q64364	Tumor suppressor ARF OS=Mus musculus GN=Cdkn2a PE=1 SV=1									48.28	1	1	21.9					30.59	1	1	11.8					1	2	2	1.66667
A6ZI47	Fructose-bisphosphate aldolase OS=Mus musculus GN=Aldoart2 PE=1 SV=1																	78.17	2	2	8.8					1	1	3	1.66667
Q9Z1Q5	Chloride intracellular channel protein 1 OS=Mus musculus GN=Clic1 PE=1 SV=3									48.65	1	1	5					29.26	1	1	5					1	2	2	1.66667
Q3TKR3	NACHT, LRR and PYD domains-containing protein 4C OS=Mus musculus GN=Nlrp4c PE=2 SV=1									38.13	1	1	0.7					39.6	1	1	0.7					1	2	2	1.66667
Q7TNB8	Protein strawberry notch homolog 2 OS=Mus musculus GN=Sbno2 PE=1 SV=1									32.51	1	1	2.2					44.38	1	1	1.5					1	2	2	1.66667
A0A0J9YV40	Histone RNA hairpin-binding protein OS=Mus musculus GN=Slbp PE=1 SV=1									39.11	1	1	6.8					37.63	1	1	3.7					1	2	2	1.66667
Q99M87	DnaJ homolog subfamily A member 3, mitochondrial OS=Mus musculus GN=Dnaja3 PE=1 SV=1	105.79	2	5	13.3	121.84	2	3	8.3	330.25	7	8	16	67.46	1	5	16	146.98	3	5	13.1	47.6	1	2	4.8	1.5	1.5	2	1.66667
Q9JJ43	RNA binding protein fox-1 homolog 1 OS=Mus musculus GN=Rbfox1 PE=1 SV=3	76.26	1	2	8.8																					3	1	1	1.66667
A2AD84	Serine/threonine-protein kinase 26 OS=Mus musculus GN=Stk26 PE=1 SV=1																	75.61	1	2	6.6					1	1	3	1.66667
A2BDQ4	Eph receptor A7, isoform CRA_b OS=Mus musculus GN=Epha7 PE=1 SV=1	39.32	1	1	1.8					36.08	1	1	2.1													2	2	1	1.66667
Q5SUH5	U7 snRNA-associated Sm-like protein LSm11 OS=Mus musculus GN=Lsm11 PE=1 SV=1																	75.28	2	2	5.5					1	1	3	1.66667
Q91XY7	Protein Pcdhga12 OS=Mus musculus GN=Pcdhga12 PE=2 SV=1									30.88	1	1	2.7					44.26	1	1	4.4					1	2	2	1.66667
Q3TC46	Protein PAT1 homolog 1 OS=Mus musculus GN=Patl1 PE=1 SV=2																	74.37	2	2	2.5					1	1	3	1.66667
P48036	Annexin A5 OS=Mus musculus GN=Anxa5 PE=1 SV=1									74.33	2	2	7.8													1	3	1	1.66667
Q9DAW6	U4/U6 small nuclear ribonucleoprotein Prp4 OS=Mus musculus GN=Prpf4 PE=1 SV=1									74.07	2	2	6.7													1	3	1	1.66667
E0CYD7	Putative E3 ubiquitin-protein ligase UNKL OS=Mus musculus GN=Unkl PE=1 SV=1									73.99	2	2	7.6													1	3	1	1.66667
Q3U186	Probable arginine--tRNA ligase, mitochondrial OS=Mus musculus GN=Rars2 PE=1 SV=1																	73.92	2	2	9.2					1	1	3	1.66667
Q8K3W3	Protein CASC3 OS=Mus musculus GN=Casc3 PE=1 SV=3	73.45	1	2	4.3																					3	1	1	1.66667
A2A9P6	Cyclin-dependent kinase 11B OS=Mus musculus GN=Cdk11b PE=1 SV=1	37.96	1	1	3.7					35.15	1	1	1.5													2	2	1	1.66667
Q8BHN3	Neutral alpha-glucosidase AB OS=Mus musculus GN=Ganab PE=1 SV=1																	72.99	2	2	5.5					1	1	3	1.66667
Q99KK2	N-acylneuraminate cytidylyltransferase OS=Mus musculus GN=Cmas PE=1 SV=2																	72.38	2	2	7.4					1	1	3	1.66667
Q7TQI8	Testis-specific Y-encoded-like protein 2 OS=Mus musculus GN=Tspyl2 PE=1 SV=1									42.34	1	1	4.3					29.39	1	1	4.3					1	2	2	1.66667
D3Z7X0	MCG142036 OS=Mus musculus GN=Acad12 PE=1 SV=1									70.76	2	2	7.4													1	3	1	1.66667
Q8K370	Acyl-CoA dehydrogenase family member 10 OS=Mus musculus GN=Acad10 PE=1 SV=1									70.76	2	2	3.9													1	3	1	1.66667
F8VQK7	Protein Gm16519 OS=Mus musculus GN=Gm16519 PE=1 SV=2									142.18	2	3	19.1	84.28	1	3	23.5	101.39	1	2	27.8					1	1	3	1.66667
J3QK23	Protein Gm9825 OS=Mus musculus GN=Gm9825 PE=4 SV=1	49.25	1	1	7.4					69.92	1	1	5.3	57.43	1	1	5.3	66.75	1	1	5.3					2	1	2	1.66667
Q6NZP1	DNA annealing helicase and endonuclease ZRANB3 OS=Mus musculus GN=Zranb3 PE=1 SV=1									68.79	1	2	3.7													1	3	1	1.66667
J3QPZ8	Eukaryotic translation initiation factor 1 (Fragment) OS=Mus musculus GN=Eif1 PE=4 SV=1	67.31	1	2	34.5																					3	1	1	1.66667
Q9Z2A7	Diacylglycerol O-acyltransferase 1 OS=Mus musculus GN=Dgat1 PE=1 SV=1									66.94	1	2	6.6													1	3	1	1.66667
Q3TDK6	Protein rogdi homolog OS=Mus musculus GN=Rogdi PE=1 SV=2									66.48	2	2	9.1													1	3	1	1.66667
E9Q8J8	Transcription factor ETV6 OS=Mus musculus GN=Etv6 PE=1 SV=1									66.44	2	2	5.8													1	3	1	1.66667
B1AUY7	N-alpha-acetyltransferase 10 OS=Mus musculus GN=Naa10 PE=1 SV=1	38.87	1	1	8.6					27.54	1	1	11.6													2	2	1	1.66667
Q07076	Annexin A7 OS=Mus musculus GN=Anxa7 PE=1 SV=2									32.53	1	1	1.7					33.3	1	1	1.7					1	2	2	1.66667
Q505D1	Serine/threonine-protein phosphatase 6 regulatory ankyrin repeat subunit A OS=Mus musculus GN=Ankrd28 PE=1 SV=1									64.9	2	2	2.8													1	3	1	1.66667
F7CVJ5	Protein Ahnak2 (Fragment) OS=Mus musculus GN=Ahnak2 PE=1 SV=1																	64.64	2	2	4.4					1	1	3	1.66667
A0A0J9YTU7	Transcription factor 4 OS=Mus musculus GN=Tcf4 PE=1 SV=1	64.5	1	2	8.7																					3	1	1	1.66667
Q3URM1	Caseinolytic peptidase B protein homolog OS=Mus musculus GN=Clpb PE=1 SV=1									63.91	1	2	6.1													1	3	1	1.66667
B9EJA2	Cortactin-binding protein 2 OS=Mus musculus GN=Cttnbp2 PE=1 SV=2									30.51	1	1	2.5					33.16	1	1	1.2					1	2	2	1.66667
E9QLJ0	Cardiomyopathy-associated protein 5 OS=Mus musculus GN=Cmya5 PE=1 SV=1																	63.41	2	2	0.8					1	1	3	1.66667
G5E886	Lebercilin OS=Mus musculus GN=Lca5 PE=1 SV=1									63.11	2	2	5													1	3	1	1.66667
P54869	Hydroxymethylglutaryl-CoA synthase, mitochondrial OS=Mus musculus GN=Hmgcs2 PE=1 SV=2																	63	2	2	4.9					1	1	3	1.66667
F6WV69	ARF GTPase-activating protein GIT2 (Fragment) OS=Mus musculus GN=Git2 PE=1 SV=6	62.99	1	2	18.5																					3	1	1	1.66667
D3Z2Z6	Phospholipid-transporting ATPase IB (Fragment) OS=Mus musculus GN=Atp8a2 PE=1 SV=1									28.41	1	1	15.1					34.36	1	1	15.1					1	2	2	1.66667
Q3V3X3	MCG3705, isoform CRA_c OS=Mus musculus GN=Tfdp1 PE=1 SV=1									62.74	1	2	8													1	3	1	1.66667
Q91ZR2	Sorting nexin-18 OS=Mus musculus GN=Snx18 PE=1 SV=1	62.5	1	2	4.1																					3	1	1	1.66667
S4R1F1	Protein Arhgef5 (Fragment) OS=Mus musculus GN=Arhgef5 PE=1 SV=1									62.34	2	2	2.5													1	3	1	1.66667
E9PX29	Protein Sptbn4 OS=Mus musculus GN=Sptbn4 PE=1 SV=1	58.04	1	1	2.9					39.58	1	1	1.5					75.29	1	1	1.7	58.11	1	1	2.6	2	2	1	1.66667
Q4V9T8	Eukaryotic translation initiation factor 1 OS=Mus musculus GN=Eif1 PE=1 SV=1	129.99	2	3	41.6	61.59	1	1	15	49.58	1	1	15													2	2	1	1.66667
Q9CQD1	Ras-related protein Rab-5A OS=Mus musculus GN=Rab5a PE=1 SV=1									60.64	1	2	10.7													1	3	1	1.66667
A0A087WSE3	Striated muscle-specific serine/threonine-protein kinase (Fragment) OS=Mus musculus GN=Speg PE=1 SV=1	60.48	1	2	1.5																					3	1	1	1.66667
Q9CX30	Protein YIF1B OS=Mus musculus GN=Yif1b PE=1 SV=2									60.44	1	2	8.7													1	3	1	1.66667
Q9Z0H1	WD repeat-containing protein 46 OS=Mus musculus GN=Wdr46 PE=2 SV=1	60.3	1	2	5.9																					3	1	1	1.66667
Q8VE70	Programmed cell death protein 10 OS=Mus musculus GN=Pdcd10 PE=1 SV=1									100.86	2	2	8.5	52.18	1	2	8.5	58.33	1	2	8.5					1	1	3	1.66667
Q3UII8	Metastasis-associated protein MTA3 OS=Mus musculus GN=Mta3 PE=1 SV=1	59.81	1	2	8.9																					3	1	1	1.66667
D3YUB9	Polyadenylate-binding protein 2 (Fragment) OS=Mus musculus GN=Pabpn1 PE=4 SV=2	59.04	1	2	11																					3	1	1	1.66667
Q8BPK2	Protein Zcchc3 OS=Mus musculus GN=Zcchc3 PE=1 SV=1									58.86	1	2	8.3													1	3	1	1.66667
E9Q6L8	BTB/POZ domain-containing protein 10 OS=Mus musculus GN=Btbd10 PE=4 SV=1									57.87	2	2	5.9													1	3	1	1.66667
Q9CZG9	PDZ domain-containing protein 11 OS=Mus musculus GN=Pdzd11 PE=1 SV=1									57.59	1	2	24.3													1	3	1	1.66667
Q922G2	Protein FAM76A OS=Mus musculus GN=Fam76a PE=2 SV=1									29.27	1	1	4.2					28.25	1	1	6.2					1	2	2	1.66667
Q9Z320	Keratin, type I cytoskeletal 27 OS=Mus musculus GN=Krt27 PE=1 SV=1																	57.46	1	2	3.6					1	1	3	1.66667
F6RSK3	Protein Gm17430 OS=Mus musculus GN=Gm17430 PE=4 SV=1	43.97	1	1	19.7					42	1	1	15.9	38.66	1	1	19.1	43.17	1	1	15.3					2	1	2	1.66667
E9Q317	Histone deacetylase complex subunit SAP18 OS=Mus musculus GN=Gm10094 PE=1 SV=1	57.37	1	2	19.2																					3	1	1	1.66667
Q8BFU3	RING finger protein 214 OS=Mus musculus GN=Rnf214 PE=1 SV=1									64.25	2	2	3					43.54	1	1	1.6	27.43	1	1	1.6	1	3	1	1.66667
Q545C1	Nucleolysin TIAR OS=Mus musculus GN=Tial1 PE=1 SV=1									56.65	1	2	9.7													1	3	1	1.66667
Q0VAW8	SRSF protein kinase 3 OS=Mus musculus GN=Srpk3 PE=1 SV=1									28.12	1	1	2.7					28.09	1	1	2.7					1	2	2	1.66667
A0A023T778	Mago nashi protein OS=Mus musculus GN=Magohb PE=1 SV=1	69.61	1	2	14.2	69.19	1	2	14.2	63.74	1	1	7.4					49.68	1	1	7.4					1	2	2	1.66667
B1ARW8	Uncharacterized protein C1orf122 homolog OS=Mus musculus PE=4 SV=1									55.92	1	2	20.9													1	3	1	1.66667
Q5XJE5	RNA polymerase-associated protein LEO1 OS=Mus musculus GN=Leo1 PE=1 SV=2									55.64	1	2	5.5													1	3	1	1.66667
Q64739	Collagen alpha-2(XI) chain OS=Mus musculus GN=Col11a2 PE=2 SV=3	55.27	1	2	2.9																					3	1	1	1.66667
P28738	Kinesin heavy chain isoform 5C OS=Mus musculus GN=Kif5c PE=1 SV=3	54.24	1	2	6.5																					3	1	1	1.66667
F7CXE4	Protein Gm7535 OS=Mus musculus GN=Gm7535 PE=4 SV=1	53.9	1	2	9.3																					3	1	1	1.66667
Q6GQT1	Alpha-2-macroglobulin-P OS=Mus musculus GN=A2mp PE=2 SV=2									110.01	3	5	3.7	31.12	1	1	0.9									1	3	1	1.66667
Q3TDQ1	Dolichyl-diphosphooligosaccharide--protein glycosyltransferase subunit STT3B OS=Mus musculus GN=Stt3b PE=1 SV=2									103.11	3	8	9.4	28.23	1	2	3.9									1	3	1	1.66667
A0A0G2JGI2	Histone H3-like centromeric protein A (Fragment) OS=Mus musculus GN=Cenpa PE=1 SV=1									91.98	2	2	18.2					57.62	1	2	18.2	54.5	2	2	18.2	1	3	1	1.66667
F7AVL7	Filamin-A (Fragment) OS=Mus musculus GN=Flna PE=1 SV=1																	52.18	1	2	66.2					1	1	3	1.66667
Q3U0M1	Trafficking protein particle complex subunit 9 OS=Mus musculus GN=Trappc9 PE=1 SV=2									51.4	1	2	2.6													1	3	1	1.66667
Q65CL1	Catenin alpha-3 OS=Mus musculus GN=Ctnna3 PE=1 SV=2	50.98	1	2	4																					3	1	1	1.66667
A0A0A6YXW8	Adenylate kinase isoenzyme 1 (Fragment) OS=Mus musculus GN=Ak1 PE=1 SV=1									50.22	1	2	22.9													1	3	1	1.66667
Q64337	Sequestosome-1 OS=Mus musculus GN=Sqstm1 PE=1 SV=1	49.89	1	2	5.9																					3	1	1	1.66667
A0A0G2JGE0	BRI3-binding protein (Fragment) OS=Mus musculus GN=Bri3bp PE=1 SV=1	49.78	1	2	22.7																					3	1	1	1.66667
A0A0G2JG78	Anaphase-promoting complex subunit 5 (Fragment) OS=Mus musculus GN=Anapc5 PE=1 SV=1									49.44	1	2	35.9													1	3	1	1.66667
D3Z7Q8	DNA-directed RNA polymerases I and III subunit RPAC1 (Fragment) OS=Mus musculus GN=Polr1c PE=1 SV=2																	49.41	1	2	7.8					1	1	3	1.66667
Q9EPL8	Importin-7 OS=Mus musculus GN=Ipo7 PE=1 SV=2									49.28	1	2	3.5													1	3	1	1.66667
Q3U3K9	Ancient ubiquitous protein 1 OS=Mus musculus GN=Aup1 PE=1 SV=1									48.82	1	2	5.9													1	3	1	1.66667
Q9D7N3	28S ribosomal protein S9, mitochondrial OS=Mus musculus GN=Mrps9 PE=1 SV=3									48.42	1	2	7.9													1	3	1	1.66667
Q9CYH5	Glucose-fructose oxidoreductase domain-containing protein 2 OS=Mus musculus GN=Gfod2 PE=2 SV=1									45.99	1	2	5.7													1	3	1	1.66667
Q5SX46	Mitochondrial 2-oxoglutarate/malate carrier protein (Fragment) OS=Mus musculus GN=Slc25a11 PE=1 SV=1	45.96	1	2	19.7																					3	1	1	1.66667
Q8CCB2	BUB3-interacting and GLEBS motif-containing protein ZNF207 OS=Mus musculus GN=Zfp207 PE=1 SV=1									45.75	1	2	7.6													1	3	1	1.66667
F6Q8A4	Ribosomal protein S6 kinase alpha-1 (Fragment) OS=Mus musculus GN=Rps6ka1 PE=1 SV=1																	45.59	1	2	4					1	1	3	1.66667
Q3UBX0	Transmembrane protein 109 OS=Mus musculus GN=Tmem109 PE=1 SV=2									45.24	1	2	8.2													1	3	1	1.66667
Q6PAC3	DDB1- and CUL4-associated factor 13 OS=Mus musculus GN=Dcaf13 PE=2 SV=2									45.03	1	2	7.2													1	3	1	1.66667
D3Z1E8	Protein numb homolog (Fragment) OS=Mus musculus GN=Numb PE=1 SV=1																	44.75	1	2	21.5					1	1	3	1.66667
Q91XY9	Protein Pcdhga10 OS=Mus musculus GN=Pcdhga10 PE=2 SV=1																	44.26	1	2	2.6					1	1	3	1.66667
P08032	Spectrin alpha chain, erythrocytic 1 OS=Mus musculus GN=Spta1 PE=1 SV=3																	43.84	1	2	1.7					1	1	3	1.66667
D3YZN8	Protein unc-45 homolog A (Fragment) OS=Mus musculus GN=Unc45a PE=1 SV=1																	43.67	1	2	11.4					1	1	3	1.66667
D6RIN1	Protein unc-45 homolog A OS=Mus musculus GN=Unc45a PE=1 SV=1																	43.67	1	2	5.6					1	1	3	1.66667
J3QMW5	Protein Gm2075 OS=Mus musculus GN=Gm2075 PE=3 SV=1									43.58	1	2	13.9													1	3	1	1.66667
F8WIK2	Poly [ADP-ribose] polymerase OS=Mus musculus GN=Parp8 PE=4 SV=1									43.44	1	2	2.9													1	3	1	1.66667
Q91XL3	UDP-glucuronic acid decarboxylase 1 OS=Mus musculus GN=Uxs1 PE=1 SV=1									42.47	1	2	7.9													1	3	1	1.66667
B1AY10	Transcriptional repressor NF-X1 OS=Mus musculus GN=Nfx1 PE=1 SV=1									42.21	1	2	2.2													1	3	1	1.66667
Q9D6L8	Peptidyl-prolyl cis-trans isomerase-like 3 OS=Mus musculus GN=Ppil3 PE=1 SV=1									86.36	2	2	18.6					39.88	1	1	11.8	52.2	1	1	11.8	1	3	1	1.66667
B0R030	Synaptosomal-associated protein (Fragment) OS=Mus musculus GN=Snap23 PE=1 SV=6									40.84	1	2	20.5													1	3	1	1.66667
Q3ULB0	Protein Rbm6 OS=Mus musculus GN=Rbm6 PE=1 SV=1																	40.69	1	2	1.8					1	1	3	1.66667
E0CXD9	Surfeit locus protein 4 OS=Mus musculus GN=Surf4 PE=1 SV=1									40.02	1	2	37.8													1	3	1	1.66667
A0A0G2JES1	Abnormal spindle-like microcephaly-associated protein homolog OS=Mus musculus GN=Aspm PE=1 SV=1	39.8	1	2	3.5																					3	1	1	1.66667
G3X8U8	Poly (ADP-ribose) glycohydrolase, isoform CRA_c OS=Mus musculus GN=Parg PE=1 SV=1									39.36	1	2	3.9													1	3	1	1.66667
Q9D2M8	Ubiquitin-conjugating enzyme E2 variant 2 OS=Mus musculus GN=Ube2v2 PE=1 SV=4									39.3	1	2	20													1	3	1	1.66667
F6V9T4	SLAIN motif-containing protein 1 (Fragment) OS=Mus musculus GN=Slain1 PE=1 SV=1	38.95	1	2	10.7																					3	1	1	1.66667
Q99MP8	BRCA1-associated protein OS=Mus musculus GN=Brap PE=2 SV=1	38.95	1	2	7.3																					3	1	1	1.66667
G5E8I8	Calcium homeostasis endoplasmic reticulum protein OS=Mus musculus GN=Cherp PE=1 SV=1	38.29	1	2	2																					3	1	1	1.66667
D3Z7D5	Collagen alpha-2(VI) chain OS=Mus musculus GN=Col6a2 PE=1 SV=1																	38.16	1	2	2					1	1	3	1.66667
Q9QZD4	DNA repair endonuclease XPF OS=Mus musculus GN=Ercc4 PE=1 SV=3																	38.01	1	2	5					1	1	3	1.66667
F7CBX2	Uridine-cytidine kinase 1 (Fragment) OS=Mus musculus GN=Uck1 PE=1 SV=1																	37.67	1	2	12					1	1	3	1.66667
A2A432	Cullin-4B OS=Mus musculus GN=Cul4b PE=1 SV=1																	37.66	1	2	3.6					1	1	3	1.66667
A0A0A6YVU8	MCG119397 OS=Mus musculus GN=Gm9774 PE=4 SV=1																	37.44	1	2	7.6					1	1	3	1.66667
Q9CQS5	Serine/threonine-protein kinase RIO2 OS=Mus musculus GN=Riok2 PE=1 SV=1									37.08	1	2	8													1	3	1	1.66667
A0A0J9YUF8	Cytospin-B OS=Mus musculus GN=Specc1 PE=1 SV=1																	36.96	1	2	5.2					1	1	3	1.66667
Q6PAM0	5~-AMP-activated protein kinase subunit beta-2 OS=Mus musculus GN=Prkab2 PE=1 SV=1									36.83	1	2	9.6													1	3	1	1.66667
Q8C754	Vacuolar protein sorting-associated protein 52 homolog OS=Mus musculus GN=Vps52 PE=1 SV=1																	36.22	1	2	6.1					1	1	3	1.66667
H3BJA3	Glutamate--cysteine ligase regulatory subunit (Fragment) OS=Mus musculus GN=Gclm PE=1 SV=1																	35.92	1	2	13.1					1	1	3	1.66667
Q8BUI3	Leucine-rich repeat and WD repeat-containing protein 1 OS=Mus musculus GN=LRWD1 PE=2 SV=1									35.8	1	2	5.9													1	3	1	1.66667
O88325	Alpha-N-acetylglucosaminidase OS=Mus musculus GN=Naglu PE=1 SV=1	35.78	1	2	5.5																					3	1	1	1.66667
F6ZCF0	Cytosolic carboxypeptidase 1 (Fragment) OS=Mus musculus GN=Agtpbp1 PE=1 SV=1	35.59	1	2	3.9																					3	1	1	1.66667
Q641K1	Cytosolic carboxypeptidase 1 OS=Mus musculus GN=Agtpbp1 PE=1 SV=2	35.59	1	2	1.1																					3	1	1	1.66667
D3Z6D2	Double-stranded RNA-binding protein Staufen homolog 2 OS=Mus musculus GN=Stau2 PE=1 SV=1	35.57	1	2	6.3																					3	1	1	1.66667
Q64514	Tripeptidyl-peptidase 2 OS=Mus musculus GN=Tpp2 PE=1 SV=3																	35.48	1	2	2.5					1	1	3	1.66667
Q61712	DnaJ homolog subfamily C member 1 OS=Mus musculus GN=Dnajc1 PE=1 SV=1									35.37	1	2	5.4													1	3	1	1.66667
Q921I6	SH3 domain-binding protein 4 OS=Mus musculus GN=Sh3bp4 PE=1 SV=1									35.31	1	2	1.9													1	3	1	1.66667
Q8C570	mRNA export factor OS=Mus musculus GN=Rae1 PE=1 SV=1	107.19	2	5	15.5	73.3	1	5	19.8	277.35	5	8	37	102.83	2	2	14.7	63.44	2	3	11.7	94.48	2	3	17.1	1	3	1	1.66667
Q5BKQ9	26S proteasome non-ATPase regulatory subunit 11 OS=Mus musculus GN=Psmd11 PE=1 SV=1																	34.85	1	2	7.1					1	1	3	1.66667
Q3TA68	Protein Wdr36 OS=Mus musculus GN=Wdr36 PE=1 SV=1									34.79	1	2	3.5													1	3	1	1.66667
Q5SS80	Dehydrogenase/reductase SDR family member 13 OS=Mus musculus GN=Dhrs13 PE=1 SV=1									34.51	1	2	10.4													1	3	1	1.66667
P18155	Bifunctional methylenetetrahydrofolate dehydrogenase/cyclohydrolase, mitochondrial OS=Mus musculus GN=Mthfd2 PE=1 SV=1									34.48	1	2	10													1	3	1	1.66667
Q8CD15	Bifunctional lysine-specific demethylase and histidyl-hydroxylase MINA OS=Mus musculus GN=Mina PE=1 SV=2									34.02	1	2	7.7													1	3	1	1.66667
F6S1R2	Activator of 90 kDa heat shock protein ATPase homolog 2 (Fragment) OS=Mus musculus GN=Ahsa2 PE=1 SV=1																	33.91	1	2	10.7					1	1	3	1.66667
A2AS45	Plakophilin-4 OS=Mus musculus GN=Pkp4 PE=1 SV=1									33.58	1	2	2													1	3	1	1.66667
Q1XID4	Renin receptor OS=Mus musculus GN=Atp6ap2 PE=1 SV=2									33.13	1	2	10													1	3	1	1.66667
D3Z5N6	Zinc finger protein ubi-d4 OS=Mus musculus GN=Dpf2 PE=1 SV=1									48.23	1	2	6.2					56.89	1	2	6.2	48.39	1	2	6.2	1	3	1	1.66667
Q922U1	U4/U6 small nuclear ribonucleoprotein Prp3 OS=Mus musculus GN=Prpf3 PE=1 SV=1																	32.8	1	2	6.3					1	1	3	1.66667
Q497I4	Keratin, type I cuticular Ha5 OS=Mus musculus GN=Krt35 PE=1 SV=1																	32.49	1	2	4.6					1	1	3	1.66667
H3BKL5	3-ketoacyl-CoA thiolase A, peroxisomal OS=Mus musculus GN=Acaa1a PE=1 SV=1									32.12	1	2	8.6													1	3	1	1.66667
Z4YJU8	Golgin subfamily A member 2 (Fragment) OS=Mus musculus GN=Golga2 PE=1 SV=2									32.11	1	2	2.4													1	3	1	1.66667
V9GXI9	Striatin-4 (Fragment) OS=Mus musculus GN=Strn4 PE=1 SV=1																	31.91	1	2	13.7					1	1	3	1.66667
B2RT97	26S proteasome non-ATPase regulatory subunit 13 OS=Mus musculus GN=Psmd13 PE=1 SV=1																	31.8	1	2	4.5					1	1	3	1.66667
Q8JZK9	Hydroxymethylglutaryl-CoA synthase, cytoplasmic OS=Mus musculus GN=Hmgcs1 PE=1 SV=1																	31.67	1	2	3.8					1	1	3	1.66667
A1L013	Cactin OS=Mus musculus GN=Cactin PE=1 SV=1									31.38	1	2	3.2													1	3	1	1.66667
Q811Q9	Choline-phosphate cytidylyltransferase B OS=Mus musculus GN=Pcyt1b PE=1 SV=2																	31.33	1	2	5.4					1	1	3	1.66667
Q3UCV8	Ubiquitin thioesterase otulin OS=Mus musculus GN=Otulin PE=1 SV=1																	31.2	1	2	5.1					1	1	3	1.66667
E9Q2E4	Protein Gm15800 OS=Mus musculus GN=Gm15800 PE=1 SV=2	48.7	1	2	2	38.34	1	2	2									38.53	1	2	0.8					1	1	3	1.66667
Q9DCA5	Ribosome biogenesis protein BRX1 homolog OS=Mus musculus GN=Brix1 PE=1 SV=3																	31.02	1	2	4.5					1	1	3	1.66667
Q91YR7	Pre-mRNA-processing factor 6 OS=Mus musculus GN=Prpf6 PE=1 SV=1									30.99	1	2	2													1	3	1	1.66667
Q4KL41	MCG10089 OS=Mus musculus GN=Tomm20 PE=1 SV=1									30.97	1	2	17.2													1	3	1	1.66667
Q3UGX2	Spectrin beta 1 OS=Mus musculus GN=Sptb PE=1 SV=1																	30.96	1	2	2					1	1	3	1.66667
Q91XX6	Protein Pcdhgb4 OS=Mus musculus GN=Pcdhgb4 PE=2 SV=1									30.88	1	2	2.4													1	3	1	1.66667
F6RQ10	Transcription termination factor 2 (Fragment) OS=Mus musculus GN=Ttf2 PE=1 SV=1																	30.67	1	2	13.2					1	1	3	1.66667
F2Z429	Tudor domain-containing protein 6 OS=Mus musculus GN=Tdrd6 PE=1 SV=1																	30.53	1	2	1.6					1	1	3	1.66667
A2AE33	Guanine nucleotide binding protein, alpha transducing 2 OS=Mus musculus GN=Gnat2 PE=2 SV=1									100.53	2	2	9					113.3	2	3	9	127.27	3	3	9	1	3	1	1.66667
Q5SQM0	Echinoderm microtubule-associated protein-like 6 OS=Mus musculus GN=Eml6 PE=2 SV=1																	29.8	1	2	1.5					1	1	3	1.66667
P0C090	Roquin-2 OS=Mus musculus GN=Rc3h2 PE=1 SV=1									29.5	1	2	3.2													1	3	1	1.66667
H3BJ44	DNA dC->dU-editing enzyme APOBEC-3 OS=Mus musculus GN=Apobec3 PE=1 SV=1									29.41	1	2	6.5													1	3	1	1.66667
Q8BVQ9	26S protease regulatory subunit 7 OS=Mus musculus GN=Psmc2 PE=1 SV=1																	29.28	1	2	4.2					1	1	3	1.66667
Q921V5	Alpha-1,6-mannosyl-glycoprotein 2-beta-N-acetylglucosaminyltransferase OS=Mus musculus GN=Mgat2 PE=1 SV=1									29.22	1	2	4.5													1	3	1	1.66667
F8WGX0	FYVE, RhoGEF and PH domain-containing protein 4 (Fragment) OS=Mus musculus GN=Fgd4 PE=1 SV=1									29.16	1	2	3.8													1	3	1	1.66667
I7HJQ9	Myotubularin-related protein 1 OS=Mus musculus GN=Mtmr1 PE=1 SV=1									29.02	1	2	2.2													1	3	1	1.66667
Q542I9	26S protease regulatory subunit 4 OS=Mus musculus GN=Psmc1 PE=1 SV=1																	28.84	1	2	5.7					1	1	3	1.66667
E9PV58	Transportin-2 OS=Mus musculus GN=Tnpo2 PE=1 SV=1																	28.38	1	2	3.8					1	1	3	1.66667
Q8CGE9	Regulator of G-protein signaling 12 OS=Mus musculus GN=Rgs12 PE=1 SV=2																	28.34	1	2	2.6					1	1	3	1.66667
G3UZZ3	Dynamin-2 (Fragment) OS=Mus musculus GN=Dnm2 PE=1 SV=1									28.3	1	2	4.7													1	3	1	1.66667
Q8BZ98	Dynamin-3 OS=Mus musculus GN=Dnm3 PE=1 SV=1									28.3	1	2	4.4													1	3	1	1.66667
Q8C4X2	Casein kinase I isoform gamma-3 OS=Mus musculus GN=Csnk1g3 PE=1 SV=2									28.21	1	2	5.9													1	3	1	1.66667
Q4U2R1	E3 ubiquitin-protein ligase HERC2 OS=Mus musculus GN=Herc2 PE=1 SV=3									28.19	1	2	0.7													1	3	1	1.66667
F7CPG6	Translation initiation factor eIF-2B subunit delta (Fragment) OS=Mus musculus GN=Eif2b4 PE=1 SV=1									27.92	1	2	8.6													1	3	1	1.66667
F7ANF4	Puromycin-sensitive aminopeptidase (Fragment) OS=Mus musculus GN=Npepps PE=1 SV=6																	27.6	1	2	9.6					1	1	3	1.66667
A0A0G2JF49	Multidrug resistance protein 1B (Fragment) OS=Mus musculus GN=Abcb1b PE=1 SV=1									27.47	1	2	3.4													1	3	1	1.66667
B7ZC24	Nuclear receptor coactivator 5 OS=Mus musculus GN=Ncoa5 PE=1 SV=1									27.45	1	2	5.4													1	3	1	1.66667
Q3TRJ1	Vacuolar protein sorting 35, isoform CRA_a OS=Mus musculus GN=Vps35 PE=1 SV=1	84.9	2	2	2.5					126.14	3	6	9.3	92.48	3	6	10.9	160.24	4	6	9.2	151.79	4	6	9.3	3	1	1	1.66667
Q5HZH8	MAD2 mitotic arrest deficient-like 1 (Yeast) OS=Mus musculus GN=Mad2l1 PE=1 SV=1																	27.28	1	2	6.8					1	1	3	1.66667
Q3TVI8	Pre-B-cell leukemia transcription factor-interacting protein 1 OS=Mus musculus GN=Pbxip1 PE=1 SV=2	140.74	3	5	8.9	47.8	1	5	7	31.47	1	2	3.2					82.78	2	3	5.5	114.04	3	3	6.2	1	3	1	1.66667
Q8R570	Synaptosomal-associated protein 47 OS=Mus musculus GN=Snap47 PE=1 SV=1									26.4	1	2	10.7													1	3	1	1.66667
Q9CWV1	DNA helicase MCM8 OS=Mus musculus GN=Mcm8 PE=1 SV=3									73.93	1	2	3.5	47.48	1	2	2	56.07	2	5	7.7	30.12	1	1	1.4	1	1	3	1.66667
P61965	WD repeat-containing protein 5 OS=Mus musculus GN=Wdr5 PE=1 SV=1	63.72	1	5	21	52.55	1	2	12.6	31.53	1	2	7.5	37.28	1	1	4.2	103.67	2	2	8.1	51.04	1	1	4.2	2	1.5	1.5	1.66667
Q69ZW3	EH domain-binding protein 1 OS=Mus musculus GN=Ehbp1 PE=1 SV=3	49.12	1	3	4.2	41.2	1	3	6.5	29.43	1	2	3.2					34.74	1	2	1.9	35.1	1	2	3.7	1	3	1	1.66667
Q99JP6	Homer protein homolog 3 OS=Mus musculus GN=Homer3 PE=1 SV=2									69.4	2	4	11	73.1	1	4	16.6	36.92	1	2	5.6					1	1	3	1.66667
B1AVY7	Kinesin-like protein KIF16B OS=Mus musculus GN=Kif16b PE=1 SV=1									29.97	1	2	3.2					39.77	1	1	2	47.14	1	1	2.5	1	3	1	1.66667
Q3U182	CREB-regulated transcription coactivator 2 OS=Mus musculus GN=Crtc2 PE=1 SV=2									53.71	1	2	3.8					40.72	1	2	4.8	72.97	2	2	2.5	1	3	1	1.66667
P42128	Forkhead box protein K1 OS=Mus musculus GN=Foxk1 PE=1 SV=2	34.82	1	2	2.8					35.94	1	2	6	70.73	2	2	3.6									3	1	1	1.66667
Q3TX21	Cysteine rich protein 61 OS=Mus musculus GN=Cyr61 PE=1 SV=1	105.64	2	4	11.9	48.7	1	1	2.4	75.21	2	5	9.8	60.13	1	2	5	74.17	2	2	4.7	156.23	4	5	10.3	2.5	2	0.5	1.66667
P25911	Tyrosine-protein kinase Lyn OS=Mus musculus GN=Lyn PE=1 SV=4	55.61	1	1	2.9	90.94	2	2	4.7	88.31	2	3	6.3									95.97	2	2	4.3	0.666667	4	0.333333	1.66667
Q8R326	Paraspeckle component 1 OS=Mus musculus GN=Pspc1 PE=1 SV=1	252.78	4	7	20.5	354.33	5	5	13.4	282.69	7	9	19.1	56.5	2	3	6.5	352.82	7	7	17.8	160.82	4	6	14	1.33333	2.5	1.14286	1.65873
Q61846	Maternal embryonic leucine zipper kinase OS=Mus musculus GN=Melk PE=1 SV=2	205.18	4	8	19	37.64	1	6	20.2	438.78	8	12	18.8	93.64	2	4	8.1	488.72	8	13	20.1	405.99	9	12	18	1.28571	2.6	1.07692	1.65421
A2AMY5	Ubiquitin-associated protein 2 OS=Mus musculus GN=Ubap2 PE=1 SV=1	729.12	11	16	18.7	380.65	5	7	8	1116.5	17	21	28.2	543.98	9	11	16.7	617.91	11	14	20.6	785.96	12	14	22.5	2.125	1.83333	1	1.65278
B1AWB9	Collagen alpha-1(V) chain OS=Mus musculus GN=Col5a1 PE=1 SV=1	421.3	7	14	10	547.07	9	18	11.7					162.87	3	5	4.6	113.96	2	3	3.2					0.789474	0.166667	4	1.65205
Q5SS40	14-3-3 protein epsilon OS=Mus musculus GN=Ywhae PE=1 SV=1	253.82	5	8	28.6	161.05	3	9	28.6	293.56	6	9	31.8	159.88	3	3	12.2	119.19	2	5	28.6	103.4	2	3	12.2	0.9	2.5	1.5	1.63333
P61963	DDB1- and CUL4-associated factor 7 OS=Mus musculus GN=Dcaf7 PE=1 SV=1	89.44	1	5	14.3	97.75	1	1	4.4	174.14	3	4	14.9	63.28	1	4	15.8	192.19	4	6	22.5	322.26	7	7	21.1	3	1	0.875	1.625
Q3U1C2	MCG130614 OS=Mus musculus GN=Ruvbl1 PE=1 SV=1	838.32	12	12	34.6	559.24	8	10	33.1	916.51	15	22	46.5	554.75	10	11	32.2	809.84	13	20	46.1	539.99	10	11	36.4	1.18182	1.91667	1.75	1.61616
B9EHJ3	Tight junction protein ZO-1 OS=Mus musculus GN=Tjp1 PE=1 SV=1	1977.14	33	52	36.9	1193.59	19	33	21.5	669.35	13	20	17	275.44	7	14	12.6	541.09	11	16	13.1	272.45	5	8	6.1	1.55882	1.4	1.88889	1.6159
P21981	Protein-glutamine gamma-glutamyltransferase 2 OS=Mus musculus GN=Tgm2 PE=1 SV=4	1928.16	29	36	45.9	1619.93	24	27	43.7	1465.3	26	30	45.2	381.05	9	14	27.7	1327.9	22	28	37.9	681.51	14	19	35.9	1.32143	2.06667	1.45	1.6127
Q8C3X8	Lipase maturation factor 2 OS=Mus musculus GN=Lmf2 PE=1 SV=1									223.39	4	6	10.4	48.94	1	2	4.7	70.72	1	2	4.3	32.55	1	1	2	1	2.33333	1.5	1.61111
Q9JMB0	G kinase-anchoring protein 1 OS=Mus musculus GN=Gkap1 PE=1 SV=1	175.22	2	4	21.9	194.95	2	9	28.7	262.24	4	6	27.6	80.99	1	2	6.8	135.92	3	5	21.3	127.93	2	2	6.8	0.5	2.33333	2	1.61111
E0CYE2	Inosine-5~-monophosphate dehydrogenase OS=Mus musculus GN=Impdh1 PE=1 SV=1					144.72	2	2	7	188.77	4	6	17.4	54.13	1	1	7									0.333333	3.5	1	1.61111
A2AKU9	ATP synthase subunit gamma OS=Mus musculus GN=Atp5c1 PE=1 SV=1	36.34	1	2	13.5									104.25	2	2	7.1	149.61	3	5	17.8	158.48	3	3	11.1	3	0.333333	1.5	1.61111
Q3TZZ7	Extended synaptotagmin-2 OS=Mus musculus GN=Esyt2 PE=1 SV=1									356.32	7	12	17	114.65	3	5	10.2	327.29	7	9	12.7	35.96	1	5	9	1	2.16667	1.66667	1.61111
F6Z9T5	R3H domain-containing protein 2 (Fragment) OS=Mus musculus GN=R3hdm2 PE=1 SV=1	38.31	1	2	3.8	53.86	1	2	5.4	172.84	3	4	6.3	36.36	1	1	3.2	165.24	3	3	6.5	110.28	2	2	6.1	1	2.5	1.33333	1.61111
Q8VDN2	Sodium/potassium-transporting ATPase subunit alpha-1 OS=Mus musculus GN=Atp1a1 PE=1 SV=1	36.2	1	1	1.9					94.6	3	9	10.3	106.09	3	4	5.3	58.78	2	4	5.5	174.88	4	5	5.8	2	2	0.833333	1.61111
E9QMJ8	Axin-1 OS=Mus musculus GN=Axin1 PE=1 SV=1	76.67	2	2	3.7													82.22	2	3	5.2	28.37	1	4	5.2	3	1	0.8	1.6
O08792	Transcription factor COE2 OS=Mus musculus GN=Ebf2 PE=1 SV=4	180.98	3	3	8	145.35	2	4	10.4									86.06	1	2	4.7					0.8	1	3	1.6
Q8CI11	Guanine nucleotide-binding protein-like 3 OS=Mus musculus GN=Gnl3 PE=1 SV=2	40.04	1	1	4.3					289.07	5	7	27.3	169.13	2	3	13.4	50.07	1	3	9.3	118.26	2	4	10.8	2	2	0.8	1.6
Q8BGQ7	Alanine--tRNA ligase, cytoplasmic OS=Mus musculus GN=Aars PE=1 SV=1									57.48	2	2	0.8					27.06	1	3	1.5	60.45	2	4	3.4	1	3	0.8	1.6
Q3TJY2	WD repeat domain 1 OS=Mus musculus GN=Wdr1 PE=1 SV=1	37.91	1	1	2.6	39.85	1	1	2.6	26.63	1	2	5.3					29.44	1	3	3.8	53.04	1	4	11.4	1	3	0.8	1.6
A2AJH3	Glycylpeptide N-tetradecanoyltransferase OS=Mus musculus GN=Nmt2 PE=1 SV=1	304.94	5	6	15.5	52.21	1	4	13.7	481.24	10	12	27.3	179.09	4	5	13.7	386.88	8	10	21.7	425.23	7	8	17.3	1.4	2.16667	1.22222	1.5963
A2AH85	116 kDa U5 small nuclear ribonucleoprotein component OS=Mus musculus GN=Eftud2 PE=1 SV=1	132.98	3	7	10.3	55.09	1	7	7.7	411.58	8	15	21.3	135.65	2	6	7.8	223.48	6	11	15.7	225.79	5	7	9.4	1	2.28571	1.5	1.59524
Q0VDL6	Cyclin-dependent kinase 18 OS=Mus musculus GN=Cdk18 PE=1 SV=1	98.24	2	2	6.9					102.04	2	2	6.9	52.77	1	3	6.2	106.69	2	2	6.9	78.01	2	2	6.9	3	0.75	1	1.58333
B9EJ86	Oxysterol-binding protein-related protein 8 OS=Mus musculus GN=Osbpl8 PE=1 SV=1	42.97	1	2	3.7	63.83	1	3	4.3	55.16	1	1	3.6					58.83	1	1	2					0.75	2	2	1.58333
Q9D8X5	CCR4-NOT transcription complex subunit 8 OS=Mus musculus GN=Cnot8 PE=2 SV=1	108.83	2	2	8.6					81.24	2	2	12	91.81	2	3	14.7									3	0.75	1	1.58333
Q6PCZ4	Melanoma-associated antigen E1 OS=Mus musculus GN=Magee1 PE=1 SV=1									41.12	1	2	3.4	27.42	1	3	4.5	39.37	1	2	2.5					1	0.75	3	1.58333
Q8K2C9	Very-long-chain (3R)-3-hydroxyacyl-CoA dehydratase 3 OS=Mus musculus GN=Hacd3 PE=1 SV=2	48.67	1	2	12.4	100.86	2	3	13	302.51	5	5	16.9	148.2	3	3	10.8	125.48	2	4	13.8	46.68	1	1	2.8	0.75	1.5	2.5	1.58333
Q8BR92	Paralemmin-2 OS=Mus musculus GN=Palm2 PE=1 SV=1					37.18	1	1	8	117.74	2	3	7.4									29.8	1	3	13	0.5	4	0.25	1.58333
Q5SSZ5	Tensin-3 OS=Mus musculus GN=Tns3 PE=1 SV=1	146.78	2	4	2.8	90.96	1	3	4.4	93.98	1	2	2.8					84.03	1	1	2.3	137.55	2	3	2.2	1.25	3	0.5	1.58333
Q3TEE8	Thioredoxin domain-containing protein 5 OS=Mus musculus GN=Txndc5 PE=1 SV=1									30.82	1	2	4.3	33.67	1	3	11.3	34.5	1	2	6.5					1	0.75	3	1.58333
B2RR83	Probable ATP-dependent RNA helicase YTHDC2 OS=Mus musculus GN=Ythdc2 PE=1 SV=1					38.92	1	3	2.9	94.53	2	8	6.6	74.13	2	2	3.4	106.36	2	5	4.7	71.45	2	3	3.6	0.25	3	1.5	1.58333
F8WHR6	Probable ATP-dependent RNA helicase DDX46 OS=Mus musculus GN=Ddx46 PE=1 SV=1	49.07	1	2	7.6													50.48	1	2	2.1	99.41	2	3	6.5	3	1	0.75	1.58333
Q3U0T9	RAB35, member RAS oncogene family OS=Mus musculus GN=Rab35 PE=1 SV=1	47.14	1	2	10					83.15	2	2	10	87.59	2	3	21.4	45.35	1	3	15.4	137.51	3	3	15.4	3	0.75	1	1.58333
A0A0G2JEP4	Leucine-rich repeat flightless-interacting protein 2 OS=Mus musculus GN=Lrrfip2 PE=1 SV=1	37.82	1	2	9.4					82.18	2	2	6.1	526.49	10	11	35.6	312.54	6	8	19.1	171.19	3	5	10.1	3	0.25	1.5	1.58333
E9QKZ2	Importin-9 OS=Mus musculus GN=Ipo9 PE=1 SV=1	61.23	1	2	3.4					150.74	3	4	6.3	155.72	4	5	8	177.58	5	9	9.3	268.49	6	10	8.6	3	0.833333	0.909091	1.58081
Q99LL5	Periodic tryptophan protein 1 homolog OS=Mus musculus GN=Pwp1 PE=1 SV=1	122.15	2	3	10	154.95	2	4	10.4	569.88	11	15	29.7	169.37	3	5	15.4	115.11	3	4	12.4	109.29	3	3	6.4	0.8	2.66667	1.25	1.57222
G5E8J3	Bromodomain and WD repeat domain containing 2, isoform CRA_a OS=Mus musculus GN=Wdr11 PE=1 SV=1	106.35	2	7	8.6	210.04	4	6	7.1	272.36	6	9	10.1	167.45	3	4	6	196.55	4	10	10.3	195.29	5	6	8.9	1.14286	2	1.57143	1.57143
Q3TIJ7	Chaperonin subunit 7 (Eta), isoform CRA_a OS=Mus musculus GN=Cct7 PE=1 SV=1	43.2	1	5	11.4	87.35	2	2	9.6	713.82	14	17	37.9	281.79	6	10	20.8	859.8	15	15	36	733.01	14	14	31.8	2	1.63636	1.06667	1.56768
Q80WJ7	Protein LYRIC OS=Mus musculus GN=Mtdh PE=1 SV=1	424.61	7	14	26.1	146.99	3	7	12.3	708.15	13	14	28.7	256.76	6	12	20.9	315.38	8	14	23.7	295.83	7	8	18.8	1.875	1.15385	1.66667	1.56517
Q3U9K9	Trafficking protein particle complex 3 OS=Mus musculus GN=Trappc3 PE=1 SV=1	91.07	2	2	8.9	41.57	1	1	4.4	177.16	3	4	23.3	35.7	1	2	10.6	119.02	2	2	14.4	32.46	1	1	6.1	1.5	1.66667	1.5	1.55556
Q7TS74	Cytoskeleton-associated protein 2-like OS=Mus musculus GN=Ckap2l PE=1 SV=1	40.18	1	1	5.9					51.82	1	1	3.6					33.95	1	1	1.9	30.67	1	2	2.3	2	2	0.666667	1.55556
Q6PE54	Probable ATP-dependent RNA helicase DHX40 OS=Mus musculus GN=Dhx40 PE=1 SV=1									39.22	1	2	4					73.45	1	1	5.1	41.19	1	2	5.3	1	3	0.666667	1.55556
P09411	Phosphoglycerate kinase 1 OS=Mus musculus GN=Pgk1 PE=1 SV=4									86.03	2	2	10.8					101.32	1	1	6.7	101.82	2	2	10.8	1	3	0.666667	1.55556
Q6NV99	Protein Haus6 OS=Mus musculus GN=Haus6 PE=1 SV=1									321.24	7	9	11.9	134.39	3	3	3.3	135.1	3	6	7.8	164.65	3	5	7.8	1	2.5	1.16667	1.55556
Q9EQC5	N-terminal kinase-like protein OS=Mus musculus GN=Scyl1 PE=1 SV=1									86.55	3	5	8.4	30.35	1	2	2.7	80.32	2	4	8.9	75.38	2	2	3	1	2	1.66667	1.55556
Q9CPP0	Nucleoplasmin-3 OS=Mus musculus GN=Npm3 PE=1 SV=3	291.72	4	6	41.7	138.05	1	2	17.7	155.12	1	3	29.7	165.95	2	2	17.7	222.8	3	3	17.7	190.08	3	3	17.7	2.33333	1.33333	1	1.55556
Q8C3Y6	Mothers against decapentaplegic homolog OS=Mus musculus GN=Smad1 PE=1 SV=1									39.84	1	2	5.6					39.41	1	1	4.2	47.9	1	2	4.2	1	3	0.666667	1.55556
Q8BPY9	Fidgetin-like protein 1 OS=Mus musculus GN=Fignl1 PE=1 SV=1	55.19	1	2	2.8	51.62	1	2	2.9	33.16	1	2	4.4					31.29	1	1	3.1	32.48	1	2	4.1	1	3	0.666667	1.55556
F8WIB1	ADP-ribosylation factor-like protein 1 (Fragment) OS=Mus musculus GN=Arl1 PE=1 SV=1									73.44	2	2	14.5					39.19	1	1	8	121.7	2	2	18.1	1	3	0.666667	1.55556
Q9D787	Peptidyl-prolyl cis-trans isomerase-like 2 OS=Mus musculus GN=Ppil2 PE=1 SV=2	83.16	2	3	5	52.76	1	3	6.9	37.52	1	2	8.1					33.24	1	3	8.1	120.64	3	5	12.3	1	3	0.666667	1.55556
Q8BI72	CDKN2A-interacting protein OS=Mus musculus GN=Cdkn2aip PE=1 SV=1	246.15	4	5	14.2	252.32	3	9	22.4	291.6	7	7	17.6	77.13	2	2	4.1	265.15	5	6	14.4	186.04	4	4	10.7	0.6	2.66667	1.4	1.55556
Q642K5	40S ribosomal protein S30 OS=Mus musculus GN=Fau PE=1 SV=1	57.68	1	3	9	57.91	1	1	7.5	88.49	2	3	8.3	101.86	2	2	8.3	118.33	3	3	8.3	64.75	1	2	8.3	2	1.33333	1.33333	1.55556
Q5XJY5	Coatomer subunit delta OS=Mus musculus GN=Arcn1 PE=1 SV=2	90.38	2	5	11.2	38.27	1	5	10.4	367.01	8	12	26.8	178.72	4	6	19.6	376.79	9	13	29.9	259.99	6	7	19	1	1.85714	1.75	1.53571
Q8R3F5	Malonyl-CoA-acyl carrier protein transacylase, mitochondrial OS=Mus musculus GN=Mcat PE=1 SV=3									217.01	6	7	24.4	67.7	2	4	13.4	131.58	2	5	20.2	28.64	1	2	5.5	1	1.6	2	1.53333
Q7TMG8	Glioblastoma amplified sequence OS=Mus musculus GN=Gbas PE=1 SV=1									114.92	2	2	6	80.53	2	4	17.8	43.94	1	2	8.2					1	0.6	3	1.53333
Q9CXL3	Uncharacterized protein C7orf50 homolog OS=Mus musculus PE=1 SV=3	212.2	3	5	44.1	187.04	3	3	27.2	380.36	6	7	45.6	218.02	4	4	39.5	132.46	2	5	45.1	153.52	3	3	39.5	1.5	1.6	1.5	1.53333
Q3TXK1	Cytohesin-3 OS=Mus musculus GN=Cyth3 PE=1 SV=1	123.83	2	7	17.8	43.67	1	3	11.3	100.86	2	5	14.5	130.91	2	2	6.3	102.17	2	2	10.3	187.37	4	4	15	2	2	0.6	1.53333
Q3U2W2	MYB binding protein (P160) 1a, isoform CRA_b OS=Mus musculus GN=Mybbp1a PE=1 SV=1	468.94	7	11	11.1	250.29	4	8	10.4	574.23	12	17	18.1	262.33	6	9	8.3	498.13	10	15	14.4	295.52	6	10	11.2	1.33333	1.8	1.45455	1.52929
Q9D8X2	Coiled-coil domain-containing protein 124 OS=Mus musculus GN=Ccdc124 PE=1 SV=1									79.44	2	4	19.4	95.99	2	3	18	152.64	3	6	25.8	69.71	1	2	13.4	1	1.25	2.33333	1.52778
Q9CQR6	Serine/threonine-protein phosphatase 6 catalytic subunit OS=Mus musculus GN=Ppp6c PE=1 SV=1	40.94	1	1	4.3					195.13	4	4	16.1	100.79	2	3	13.1	142.66	3	3	16.7	34.89	1	2	9.2	2	1.25	1.33333	1.52778
Q8CI51	PDZ and LIM domain protein 5 OS=Mus musculus GN=Pdlim5 PE=1 SV=4	211.27	4	8	18.1	41.49	1	2	4.1	542.13	9	13	35.9	987.45	17	19	37.2	905.29	15	21	46	1075.73	19	24	47.2	3	0.7	0.88	1.52667
A2AS98	Nck-associated protein 1 OS=Mus musculus GN=Nckap1 PE=1 SV=1	195.79	4	10	10.2	160.04	4	10	10.8	367.59	9	9	8	75.39	2	3	3.8	436.43	11	13	13.1	326.87	9	12	12.4	1	2.5	1.07692	1.52564
A1L341	Dual-specificity tyrosine-phosphorylation-regulated kinase 1A OS=Mus musculus GN=Dyrk1a PE=1 SV=1									186.55	5	10	19	57.34	1	3	6.6	208.83	6	8	11.4	407.56	8	10	14.9	1	2.75	0.818182	1.52273
Q5HZI8	MCG8761 OS=Mus musculus GN=Rfc5 PE=1 SV=1	834.68	15	21	52.8	438.39	8	15	46.6	642.52	13	16	56	321.68	7	9	36.3	490.07	11	15	48.1	388.81	9	10	37.8	1.375	1.7	1.45455	1.50985
P54276	DNA mismatch repair protein Msh6 OS=Mus musculus GN=Msh6 PE=1 SV=3	319.43	7	14	12.6	182.72	4	8	8.2	738.12	14	18	18.7	410.56	8	12	11.8	655.32	14	20	19.3	499.87	11	14	16.9	1.66667	1.46154	1.4	1.5094
Q05D44	Eukaryotic translation initiation factor 5B OS=Mus musculus GN=Eif5b PE=1 SV=2	772.99	11	20	25.3	434.06	6	14	16.3	856.46	16	25	25.7	590.41	10	15	20.7	253.06	5	8	11.8	219.53	5	5	6.3	1.4	1.625	1.5	1.50833
Q922D8	C-1-tetrahydrofolate synthase, cytoplasmic OS=Mus musculus GN=Mthfd1 PE=1 SV=4	362.35	8	12	21.5	175.59	3	8	13.9	520.8	12	20	26.5	497.82	10	12	17.1	522.06	12	15	21.5	377.04	8	10	13.8	1.44444	1.61538	1.45455	1.50479
Q5M9L0	Eukaryotic translation initiation factor 3 subunit H OS=Mus musculus GN=Eif3h PE=1 SV=1	698.98	11	16	40.1	510.42	8	10	28.7	384.2	7	12	41.5	312.27	5	6	21	439.97	7	9	29	279.04	5	8	29.8	1.54545	1.85714	1.11111	1.50457
P10404	MLV-related proviral Env polyprotein OS=Mus musculus PE=1 SV=3									143.63	3	4	8.9	39.1	1	1	2									1	2.5	1	1.5
Q9CQS8	Protein transport protein Sec61 subunit beta OS=Mus musculus GN=Sec61b PE=1 SV=3	71	1	1	15.6	55.07	1	1	15.6	78.4	2	2	26	27.58	1	1	15.6	77.12	1	1	15.6					1	1.5	2	1.5
Q62418	Drebrin-like protein OS=Mus musculus GN=Dbnl PE=1 SV=2									38.99	1	1	2.5					91.83	2	2	6.9	42.24	1	1	2.5	1	2	1.5	1.5
G3X934	MCG115964 OS=Mus musculus GN=Wdr70 PE=1 SV=1									39.68	1	1	2					41.2	1	2	5.5	27.41	1	1	4	1	2	1.5	1.5
Q9DAA6	Exosome complex component CSL4 OS=Mus musculus GN=Exosc1 PE=1 SV=1									105.14	2	4	25.1	43.69	1	1	6.2									1	2.5	1	1.5
Q8CCX5	Keratin-like protein KRT222 OS=Mus musculus GN=Krt222 PE=2 SV=1	67.87	1	1	5.8									41.54	1	1	6.5	33.61	1	1	12.2					2	0.5	2	1.5
A0A0G2JEU1	Aldehyde dehydrogenase, mitochondrial OS=Mus musculus GN=Aldh2 PE=1 SV=1	55.44	1	1	3.6					28.84	1	2	5.1	32.46	1	1	6.4									2	1.5	1	1.5
E3W997	Cyclin-dependent kinase 15 OS=Mus musculus GN=Cdk15 PE=1 SV=1	55.61	1	1	3.2					47.87	1	1	3.7									52.21	1	1	3.2	2	2	0.5	1.5
G3UZ63	Kelch domain-containing protein 4 OS=Mus musculus GN=Klhdc4 PE=1 SV=1									67.29	2	3	6.3	40.8	1	1	2.7	97.11	2	5	9.4	58.56	1	3	5.8	1	2	1.5	1.5
G5E8A7	Serine/threonine-protein kinase PAK 4 OS=Mus musculus GN=Samd4b PE=1 SV=1									32.58	1	2	4.1	42.66	1	1	2.2	51.06	1	1	2.2					1	1.5	2	1.5
Q14AX6	Cyclin-dependent kinase 12 OS=Mus musculus GN=Cdk12 PE=1 SV=2	55.61	1	2	2.8	51.62	1	1	2.1	47.87	1	1	1.8					60.49	1	1	1.3	52.21	1	1	1	1.5	2	1	1.5
Q8C0S1	DIS3-like exonuclease 1 OS=Mus musculus GN=Dis3l PE=1 SV=2									42.28	1	1	2.4					27.1	1	2	6.6	37.56	1	1	3.3	1	2	1.5	1.5
P68510	14-3-3 protein eta OS=Mus musculus GN=Ywhah PE=1 SV=2	182.12	4	6	19.9	185.95	4	5	16.3	253.62	6	7	24.4	172.91	4	5	21.5	146.69	3	7	31.7	103.66	2	3	10.2	1.16667	1.33333	2	1.5
Q9ESP1	Stromal cell-derived factor 2-like protein 1 OS=Mus musculus GN=Sdf2l1 PE=1 SV=2									46.39	1	2	14.9									28.03	1	1	5.9	1	3	0.5	1.5
Q9Z179	SHC SH2 domain-binding protein 1 OS=Mus musculus GN=Shcbp1 PE=1 SV=1													39.23	1	1	1.5	55.51	1	2	6					1	0.5	3	1.5
G3X9M0	28S ribosomal protein S29, mitochondrial OS=Mus musculus GN=Dap3 PE=1 SV=1									80.81	2	2	7.3									61.78	1	1	3.5	1	3	0.5	1.5
Q3UJC3	Glycylpeptide N-tetradecanoyltransferase OS=Mus musculus GN=Nmt1 PE=1 SV=1	204.07	3	4	11.3	235.99	4	4	12.3	360.13	7	10	26	262.62	5	5	16.7	213.21	5	9	22	188.62	4	5	13.9	1	1.83333	1.66667	1.5
D3Z6D8	Mitogen-activated protein kinase 3 OS=Mus musculus GN=Mapk3 PE=1 SV=1									38.48	1	4	16.6	31.82	1	1	7.2									1	2.5	1	1.5
Q8R409	Protein HEXIM1 OS=Mus musculus GN=Hexim1 PE=1 SV=1									29.92	1	2	9.8									27.62	1	1	6.5	1	3	0.5	1.5
Q7TRB9	Olfactory receptor OS=Mus musculus GN=Olfr923 PE=2 SV=2													38.06	1	1	2.8	33.92	1	2	5.7					1	0.5	3	1.5
E9PYD5	Transcription elongation factor A protein 1 OS=Mus musculus GN=Tcea1 PE=1 SV=1									33.15	1	1	3.8	72.68	1	3	11.2	31.96	1	2	8					1	0.5	3	1.5
Q3TNY9	Biglycan OS=Mus musculus GN=Bgn PE=1 SV=1									33.24	1	2	11.1									41.29	1	1	5.4	1	3	0.5	1.5
P23949	Zinc finger protein 36, C3H1 type-like 2 OS=Mus musculus GN=Zfp36l2 PE=1 SV=2	58.56	1	2	5.8					81.13	2	3	9.5	80.02	2	3	9.9					77.83	1	1	4.1	3	1	0.5	1.5
Q3UPL0	Protein transport protein Sec31A OS=Mus musculus GN=Sec31a PE=1 SV=2									26.86	1	2	1.3									36.05	1	1	2.3	1	3	0.5	1.5
Q99LR1	Monoacylglycerol lipase ABHD12 OS=Mus musculus GN=Abhd12 PE=1 SV=2					39.25	1	1	4.3	29.49	1	2	6.3													0.5	3	1	1.5
Q9D1M4	Eukaryotic translation elongation factor 1 epsilon-1 OS=Mus musculus GN=Eef1e1 PE=1 SV=1													43.3	1	1	13.2	28.07	1	2	12.1					1	0.5	3	1.5
Q4VBG1	DEAD (Asp-Glu-Ala-Asp) box polypeptide 47 OS=Mus musculus GN=Ddx47 PE=1 SV=1	35.05	1	3	9.2	50.12	1	1	3.7	64.63	2	2	5.1	58.63	1	2	6.2	28.13	1	2	6.8	60.24	1	1	4	2	1	1.5	1.5
G3X957	Liprin-beta-2 OS=Mus musculus GN=Ppfibp2 PE=1 SV=1					110.91	2	3	7.6					118.41	3	3	3.5	146.64	3	3	3.5					0.25	0.25	4	1.5
E9Q7B0	Prolyl 4-hydroxylase subunit alpha-1 OS=Mus musculus GN=P4ha1 PE=1 SV=1													69.79	1	1	3.1	64.51	2	5	15	77.89	1	1	3.1	1	0.5	3	1.5
P97379	Ras GTPase-activating protein-binding protein 2 OS=Mus musculus GN=G3bp2 PE=1 SV=2	940.98	16	22	32.2	518.94	8	12	22.2	783.29	15	21	47.1	622.39	11	13	20.1	767.17	14	21	48.8	657.55	11	18	42.3	1.76923	1.57143	1.15789	1.49952
Q9WVM1	Rac GTPase-activating protein 1 OS=Mus musculus GN=Racgap1 PE=1 SV=1	592.8	11	17	31.1	123.93	2	8	16.6	770.1	15	17	35.7	209	5	10	23.1	583.67	13	15	31.2	729.73	14	18	34.4	2	1.63636	0.842105	1.49282
Q3UAD6	Endoplasmin OS=Mus musculus GN=Hsp90b1 PE=1 SV=1	169.79	3	3	6.5	133.46	2	3	5.4	256.15	5	10	14.8	197.64	3	4	4.6	603.8	12	13	16.8	396.93	8	10	12.6	1	2.2	1.27273	1.49091
P16546	Spectrin alpha chain, non-erythrocytic 1 OS=Mus musculus GN=Sptan1 PE=1 SV=4	2775.84	47	68	33.3	1044.27	17	33	17.3	358.1	8	13	8.4	565.67	11	20	12.8	4509.53	79	98	45.4	2040.72	37	55	27.2	2.02941	0.666667	1.76786	1.48798
Q543V3	Insulin receptor substrate 1 OS=Mus musculus GN=Irs1 PE=1 SV=1	84.72	2	7	10.8	106.2	2	2	1.6	356.97	7	9	11.5	154.12	3	6	9.7	300.46	5	9	10	927.26	20	27	28.2	2.66667	1.42857	0.357143	1.48413
P68040	Guanine nucleotide-binding protein subunit beta-2-like 1 OS=Mus musculus GN=Gnb2l1 PE=1 SV=3	752.32	13	18	55.2	472.84	6	10	33.4	583.4	11	12	37.2	365.21	7	8	30.3	473.21	9	13	54.3	374.44	7	10	31.5	1.72727	1.44444	1.27273	1.48148
Q5M9K7	40S ribosomal protein S10 OS=Mus musculus GN=Rps10 PE=1 SV=1	510.07	6	7	42.4	402.49	5	7	42.4	707.46	11	13	46.7	325.45	4	5	32.7	383.97	6	9	46.1	430.23	6	8	46.1	1	2.33333	1.11111	1.48148
Q3UJF5	DNA topoisomerase OS=Mus musculus GN=Top3b PE=1 SV=1	300.9	6	12	18.7	321.06	5	12	18.3	169.02	4	7	12.5	37.12	1	2	4.1	327.59	6	9	13.2	353.26	7	12	17.1	1	2.66667	0.769231	1.47863
Q9D902	General transcription factor IIE subunit 2 OS=Mus musculus GN=Gtf2e2 PE=1 SV=2	62.87	1	8	21.9	80.73	2	5	24.7	182.58	5	9	30.8	112.37	3	6	24.7	68.45	2	5	25	35.99	1	3	12	1.5	1.42857	1.5	1.47619
Q20BD0	Heterogeneous nuclear ribonucleoprotein A/B OS=Mus musculus GN=Hnrnpab PE=1 SV=1	362.9	6	10	30.7	245.47	4	6	21.7	254.49	6	7	26.2	148.11	3	4	15.4	113.43	3	4	15.4	91.6	2	3	12.3	1.57143	1.6	1.25	1.47381
Q9D7S7	60S ribosomal protein L22-like 1 OS=Mus musculus GN=Rpl22l1 PE=1 SV=1	243.09	5	6	38.5	104.74	2	3	25.4	195.41	3	4	32.8	147.5	2	2	32	176.21	2	2	32	80.69	1	2	22.1	1.75	1.66667	1	1.47222
A0A087WRF2	Arf-GAP with GTPase, ANK repeat and PH domain-containing protein 1 OS=Mus musculus GN=Agap1 PE=1 SV=1	401.17	6	9	17.4	161.09	2	5	10.4	273.68	5	6	11.6	124.14	3	3	5.5	176.38	4	5	9.7	210.19	4	5	8.7	1.66667	1.75	1	1.47222
Q6PCN7	Helicase-like transcription factor OS=Mus musculus GN=Hltf PE=1 SV=1					36.4	1	3	4.5	190.89	4	9	11.6	143.78	3	5	7	234.66	6	9	12.2	85.38	2	3	5.6	0.25	1.66667	2.5	1.47222
P33610	DNA primase large subunit OS=Mus musculus GN=Prim2 PE=1 SV=1	39.28	1	3	7.5	47.04	1	2	7.7	255.22	5	6	15	66.73	2	3	7.1	68.19	2	3	7.1	33.05	1	2	5	1.33333	1.75	1.33333	1.47222
P14206	40S ribosomal protein SA OS=Mus musculus GN=Rpsa PE=1 SV=4	704.32	12	12	40.7	414.3	7	8	25.1	567.01	10	12	41	347.51	5	6	28.1	635.51	9	9	37.3	509.8	8	8	33.6	1.44444	1.85714	1.11111	1.4709
Q5M9L7	40S ribosomal protein S17 OS=Mus musculus GN=Rps17 PE=1 SV=1	369.47	5	7	45.2	241.01	4	4	44.4	888.75	19	19	60	610.41	10	11	52.6	664.71	12	15	52.6	592.12	11	13	52.6	1.6	1.66667	1.14286	1.46984
Q5F258	ARF GTPase-activating protein GIT1 OS=Mus musculus GN=Git1 PE=1 SV=1	102.12	2	6	9.1	140.94	3	4	6.3	241.05	5	7	17	77.59	2	3	5.4	207.07	5	10	17.9	401.87	9	10	16.4	1.4	2	1	1.46667
Q9Z204	Heterogeneous nuclear ribonucleoproteins C1/C2 OS=Mus musculus GN=Hnrnpc PE=1 SV=1	280.8	5	7	22.7	240.62	4	6	17.9	254.29	5	7	16.9	87.25	2	3	10.2	133.81	4	4	13.7	135.58	3	3	12.1	1.14286	2	1.25	1.46429
P13864	DNA (cytosine-5)-methyltransferase 1 OS=Mus musculus GN=Dnmt1 PE=1 SV=5	455.89	9	17	12.3	432.89	9	16	11.5	390.02	8	11	8.8	206.94	4	8	8.1	228.18	4	9	7	77.63	2	4	3	1.05882	1.33333	2	1.46405
Q8BJS4	SUN domain-containing protein 2 OS=Mus musculus GN=Sun2 PE=1 SV=3	783.44	13	25	36.1	756.19	12	18	29.3	853.66	18	23	36.3	522.79	10	13	24.5	635.89	14	16	30.2	448.77	9	12	22.8	1.36842	1.71429	1.30769	1.46347
O70194	Eukaryotic translation initiation factor 3 subunit D OS=Mus musculus GN=Eif3d PE=1 SV=2	1291.82	21	28	52.6	818.62	14	16	34.3	1016.58	18	22	46.9	260.13	6	12	20.8	697.18	13	17	39.4	899.58	15	19	42.7	1.70588	1.76923	0.9	1.45837
O54946	DnaJ homolog subfamily B member 6 OS=Mus musculus GN=Dnajb6 PE=1 SV=4	128.08	3	3	11	55.48	1	3	11	545.43	10	10	32.9	157.11	4	7	23.8	127.2	3	7	19.2	66.85	2	3	13.2	1	1.375	2	1.45833
Q9D8Z1	Activating signal cointegrator 1 complex subunit 1 OS=Mus musculus GN=Ascc1 PE=1 SV=1	301.13	6	8	22.8	278.9	5	7	20.8	173.96	5	6	19.7	125.16	2	3	10.1	221.75	4	8	24.2	212.06	4	5	16	1.125	1.75	1.5	1.45833
A0A0A0MQ80	Spermatogenesis-associated protein 5 OS=Mus musculus GN=Spata5 PE=1 SV=1	258.62	5	14	22.9	196.16	4	9	17.5	460.15	11	15	25.3	276.56	7	9	14.9	196.26	4	13	20.2	510.39	8	10	20.6	1.5	1.6	1.27273	1.45758
P63085	Mitogen-activated protein kinase 1 OS=Mus musculus GN=Mapk1 PE=1 SV=3	84.8	2	7	18.7	87.8	2	9	24.9	260.56	6	12	28.5	146.65	4	6	13.7	350.64	8	11	23.2	183.47	5	6	18.4	0.8	1.85714	1.71429	1.45714
Q9CZX0	Elongator complex protein 3 OS=Mus musculus GN=Elp3 PE=1 SV=1	346.73	7	14	28	273.9	5	8	18.1	370.94	7	12	26.5	278.22	6	8	16.1	288.7	6	9	17	246.04	5	7	15.7	1.66667	1.44444	1.25	1.4537
E9PWW6	Protein Zc3h7a OS=Mus musculus GN=Zc3h7a PE=1 SV=1	156.07	3	7	9.5	67.11	1	4	7.5	222.89	5	6	8.5	49.35	1	3	6.8	102.18	2	4	6	132.49	2	4	6.8	1.6	1.75	1	1.45
Q99JB8	Protein kinase C and casein kinase II substrate protein 3 OS=Mus musculus GN=Pacsin3 PE=1 SV=1	192.82	4	7	16.7	51.73	1	4	9.2	150.42	3	6	12.5	122.58	2	3	13.2	126.87	2	3	8.3	118.76	3	3	8.3	1.6	1.75	1	1.45
Q5SQB7	MCG68069 OS=Mus musculus GN=Npm1 PE=1 SV=1	673.36	10	14	49.3	185.3	2	6	25	977.36	16	17	52.7	452.67	8	14	41.1	516.42	9	16	54.1	669.36	11	16	41.4	2.14286	1.2	1	1.44762
Q545K4	Eukaryotic translation initiation factor 6 OS=Mus musculus GN=Eif6 PE=1 SV=1									186.25	4	6	35.5	40.62	1	2	13.9	35.88	1	2	13.9	34.59	1	2	13.9	1	2.33333	1	1.44444
Q3U214	Microtubule-associated serine/threonine-protein kinase 3 OS=Mus musculus GN=Mast3 PE=1 SV=3																	109.03	3	6	5.2	26.83	1	2	1.1	1	1	2.33333	1.44444
Q922Q1	Mitochondrial amidoxime reducing component 2 OS=Mus musculus GN=Marc2 PE=1 SV=1					53.3	1	2	10.9	174.65	4	5	13.9	39.8	1	1	2.1	30.58	1	1	4.4	25.62	1	1	4.4	0.333333	3	1	1.44444
Q8R050	Eukaryotic peptide chain release factor GTP-binding subunit ERF3A OS=Mus musculus GN=Gspt1 PE=1 SV=2					43.39	1	2	4.2	36.95	1	2	3					62.11	2	3	5.3	32.34	1	3	6.4	0.333333	3	1	1.44444
O70456	14-3-3 protein sigma OS=Mus musculus GN=Sfn PE=1 SV=2	182.12	4	4	16.5	135.94	3	4	18.1	110.26	3	4	14.1	90.47	2	2	6.5	86.01	2	4	12.1	103.66	2	2	9.3	1	1.66667	1.66667	1.44444
B8JJC1	Tyrosyl-DNA phosphodiesterase 1 OS=Mus musculus GN=Tdp1 PE=1 SV=1	101.09	2	3	7.7	44.53	1	2	7.1									36.62	1	1	2.6					1.33333	1	2	1.44444
Q9D0M3	Cytochrome c1, heme protein, mitochondrial OS=Mus musculus GN=Cyc1 PE=1 SV=1									57.72	1	3	7.7	35.02	1	2	7.7	104.47	3	3	8	28.46	1	1	7.7	1	1.33333	2	1.44444
Q9CPR8	Melanoma-associated antigen G1 OS=Mus musculus GN=Ndnl2 PE=1 SV=1	89.21	2	2	18.6																	30.95	1	2	9.3	3	1	0.333333	1.44444
Q9CQA1	Trafficking protein particle complex subunit 5 OS=Mus musculus GN=Trappc5 PE=1 SV=1	78.32	2	2	11.2					74.56	2	2	9.6	43.1	1	2	9.6					35.05	1	2	11.2	3	1	0.333333	1.44444
O09110	Dual specificity mitogen-activated protein kinase kinase 3 OS=Mus musculus GN=Map2k3 PE=1 SV=2									67.41	2	3	11	46.99	1	2	6.9	30.25	1	1	6.9					1	1.33333	2	1.44444
Q9DBE8	Alpha-1,3/1,6-mannosyltransferase ALG2 OS=Mus musculus GN=Alg2 PE=1 SV=2									71.02	2	3	11.6	59.44	1	2	8.4	37.16	1	1	6					1	1.33333	2	1.44444
Q7M6Y3	Phosphatidylinositol-binding clathrin assembly protein OS=Mus musculus GN=Picalm PE=1 SV=1													44.93	1	2	8.5	67.63	2	2	7.3					1	0.333333	3	1.44444
Q80Y17	Lethal(2) giant larvae protein homolog 1 OS=Mus musculus GN=Llgl1 PE=1 SV=1									54.51	1	2	4.1									37.91	1	2	2.5	1	3	0.333333	1.44444
A2AFQ2	3-hydroxyacyl-CoA dehydrogenase type-2 OS=Mus musculus GN=Hsd17b10 PE=1 SV=1	144.4	2	3	18.1	152.62	2	2	15.1	148.71	2	3	14.8	89.86	1	1	7.4	76.49	1	1	7.4	77.48	1	1	7.4	1.33333	2	1	1.44444
P02668	Kappa-casein (Laboratory-Cont) OS=Bos taurus GN=CSN3 PE=1 SV=1					110.79	2	2	14.7									121.06	2	2	14.7					0.333333	1	3	1.44444
B1ASU9	Serine/threonine-protein kinase tousled-like 2 OS=Mus musculus GN=Tlk2 PE=1 SV=1									30.55	1	2	6.5									26.83	1	2	4.8	1	3	0.333333	1.44444
Q8VEJ9	Vacuolar protein sorting-associated protein 4A OS=Mus musculus GN=Vps4a PE=1 SV=1	55.19	1	3	8.5	51.62	1	1	8.9									31.29	1	3	8	32.48	1	2	6.4	2	1	1.33333	1.44444
B0QZI1	DNA topoisomerase OS=Mus musculus GN=Top3a PE=1 SV=1	62.67	1	2	3.9																	61.75	1	2	3	3	1	0.333333	1.44444
D3Z345	Cell growth-regulating nucleolar protein (Fragment) OS=Mus musculus GN=Lyar PE=1 SV=1									69.97	1	2	11.5									71.58	1	2	17.3	1	3	0.333333	1.44444
E0CXC2	Protein Gm28043 OS=Mus musculus GN=Gm28043 PE=4 SV=1	55.77	1	3	6.7	67.57	1	2	4.5									27.58	1	3	6.3	26.45	1	1	1.9	1.33333	1	2	1.44444
P51943	Cyclin-A2 OS=Mus musculus GN=Ccna2 PE=1 SV=2													72.24	1	2	8.5	62.86	1	2	7.1					1	0.333333	3	1.44444
Q9CXG3	Peptidyl-prolyl cis-trans isomerase-like 4 OS=Mus musculus GN=Ppil4 PE=1 SV=2									34.39	1	2	4.5									44.72	1	2	5.5	1	3	0.333333	1.44444
A0A0G2JGQ6	Serine/threonine-protein kinase DCLK1 OS=Mus musculus GN=Dclk1 PE=1 SV=1	41.97	1	2	5	172.82	3	8	10.4									48.42	1	2	6					0.333333	1	3	1.44444
Q8C115	Pleckstrin homology domain-containing family H member 2 OS=Mus musculus GN=Plekhh2 PE=1 SV=3	74.4	1	5	5.6	161.08	3	4	4	211.82	4	7	7.1	44.41	1	2	1.9	56.8	2	3	3.3	225.04	5	8	7.4	1.2	2.66667	0.444444	1.43704
Q9EPU0	Regulator of nonsense transcripts 1 OS=Mus musculus GN=Upf1 PE=1 SV=2	1894.42	31	41	40.4	1263.3	20	26	26.7	1970.89	32	37	38.1	1123.24	19	24	29.3	1316.57	22	36	36.7	1264.77	21	29	32	1.55556	1.52	1.23333	1.4363
Q8BXV2	BRI3-binding protein OS=Mus musculus GN=Bri3bp PE=1 SV=1	88.57	2	4	18.6	37.42	1	1	10.3	352.42	5	5	19.8	218.7	4	5	19.4	146.88	2	3	19.4	86.37	1	4	19.4	2.5	1	0.8	1.43333
A2AEX6	Four and a half LIM domains protein 1 OS=Mus musculus GN=Fhl1 PE=1 SV=1					46.57	1	1	3.9	124.8	2	3	11.7	233.07	4	4	11.7	156.14	2	2	7.4					0.5	0.8	3	1.43333
Q4FZK2	Elongation factor 1-gamma OS=Mus musculus GN=Eef1g PE=1 SV=1	410.56	8	15	28.4	382.95	8	11	26.3	539.49	11	15	31.8	203.58	4	10	26.8	551.89	11	14	29.1	298.22	6	9	26.3	1.33333	1.45455	1.5	1.42929
P46061	Ran GTPase-activating protein 1 OS=Mus musculus GN=Rangap1 PE=1 SV=2	39.91	1	1	3.7	41.46	1	6	13.9									31.64	1	2	4.1					0.285714	1	3	1.42857
Q99JX4	Eukaryotic translation initiation factor 3 subunit M OS=Mus musculus GN=Eif3m PE=1 SV=1	1107.59	15	21	42.5	476.84	8	13	32.9	775.09	14	17	36.9	443.94	7	10	30.7	644.45	12	14	39.3	663.71	11	13	31.6	1.57143	1.63636	1.07143	1.42641
O88569	Heterogeneous nuclear ribonucleoproteins A2/B1 OS=Mus musculus GN=Hnrnpa2b1 PE=1 SV=2	1227.87	17	25	59.2	875.21	12	18	52.1	542	10	12	31.4	358.36	7	7	24.4	247.28	6	8	26.3	216.71	5	6	18.1	1.36842	1.625	1.28571	1.42638
O35295	Transcriptional activator protein Pur-beta OS=Mus musculus GN=Purb PE=1 SV=3	577.2	7	11	45.7	465.87	5	7	31.5	561.09	9	11	53.4	348.17	5	5	39.2	353.93	4	6	42.6	456.86	8	8	42	1.5	2	0.777778	1.42593
P70372	ELAV-like protein 1 OS=Mus musculus GN=Elavl1 PE=1 SV=2	1067.75	17	20	45.1	524.57	8	12	45.1	780.67	13	16	44.5	529.96	9	10	35.6	370.21	7	10	40.8	461.42	9	9	36.2	1.61538	1.54545	1.1	1.42028
O54774	AP-3 complex subunit delta-1 OS=Mus musculus GN=Ap3d1 PE=1 SV=1	226.87	4	6	8.4	44.45	1	4	5	473.92	10	16	18.3	401.93	8	10	12.8	791.19	15	20	21	433	10	15	17.8	1.4	1.54545	1.3125	1.41932
Q7TPM9	Myotubularin-related protein 10 OS=Mus musculus GN=Mtmr10 PE=1 SV=2									197.92	4	7	13.4	44.17	1	3	7	59.11	1	4	6.6	36.4	1	3	6	1	2	1.25	1.41667
Q8BTW9	Serine/threonine-protein kinase PAK 4 OS=Mus musculus GN=Pak4 PE=1 SV=1									104.11	2	2	3.9									55.43	1	3	6.9	1	3	0.25	1.41667
F6ZJ27	Enhancer of mRNA-decapping protein 4 (Fragment) OS=Mus musculus GN=Edc4 PE=1 SV=1	86.06	2	4	11.7	86.17	2	3	7	40.23	1	1	6.8													1.25	2	1	1.41667
Q91VE0	Long-chain fatty acid transport protein 4 OS=Mus musculus GN=Slc27a4 PE=1 SV=1					50.8	1	3	5.1	100.75	2	2	4.2	50.62	1	2	4.2	32.95	1	2	4					0.25	1	3	1.41667
Q5SUH6	Clathrin interactor 1 OS=Mus musculus GN=Clint1 PE=1 SV=1					53.71	1	3	5.6	37.97	1	1	2.8					28.31	1	1	1.7					0.25	2	2	1.41667
Q61598	Rab GDP dissociation inhibitor beta OS=Mus musculus GN=Gdi2 PE=1 SV=1									32.21	1	2	6.7									26.12	1	3	10.3	1	3	0.25	1.41667
Q8CAQ8	MICOS complex subunit Mic60 OS=Mus musculus GN=Immt PE=1 SV=1	68.77	1	8	22.2	64.55	1	3	8.7																	2.25	1	1	1.41667
P60766	Cell division control protein 42 homolog OS=Mus musculus GN=Cdc42 PE=1 SV=2	64.42	1	4	28.8	45.84	1	1	8.4	64.23	1	2	14.1	133.37	3	3	19.9	83	2	3	19.9	92.86	2	3	19.9	2.5	0.75	1	1.41667
Q8BHD8	Protein-L-isoaspartate O-methyltransferase domain-containing protein 2 OS=Mus musculus GN=Pcmtd2 PE=2 SV=1	40.43	1	2	11.1																	74.95	2	3	16.4	3	1	0.25	1.41667
Q9R0Y5	Adenylate kinase isoenzyme 1 OS=Mus musculus GN=Ak1 PE=1 SV=1													242.15	3	3	23.2	98.7	2	2	17.5					1	0.25	3	1.41667
Q99JY0	Trifunctional enzyme subunit beta, mitochondrial OS=Mus musculus GN=Hadhb PE=1 SV=1	111.72	2	6	14.3	57.97	1	4	10.5	272.46	6	10	24.6	169.81	4	5	14.9	188.23	4	4	12.8	53.23	1	4	11.8	1.4	1.83333	1	1.41111
Q3TJZ6	Protein FAM98A OS=Mus musculus GN=Fam98a PE=1 SV=1	628.45	7	12	27.4	331.64	4	8	25	691.13	10	16	38.1	304.3	6	8	12.6	514.77	7	8	20.4	492.13	7	9	21.6	1.44444	1.88889	0.9	1.41111
Q9DBZ5	Eukaryotic translation initiation factor 3 subunit K OS=Mus musculus GN=Eif3k PE=1 SV=1	430.13	6	8	45	240.43	4	5	28.4	300.67	6	7	37.2	192.6	4	5	30.3	244.61	5	6	30.3	162.77	4	4	28.4	1.5	1.33333	1.4	1.41111
Q61990	Poly(rC)-binding protein 2 OS=Mus musculus GN=Pcbp2 PE=1 SV=1	667.37	9	13	37.8	576.54	9	10	31.5	616.69	12	13	35.4	514.17	9	9	29.6	600.84	11	13	32	438.66	8	8	31.5	1.27273	1.4	1.55556	1.40943
A2AVJ7	Ribosome-binding protein 1 OS=Mus musculus GN=Rrbp1 PE=1 SV=1	949.14	12	20	19.9	1285.46	19	30	28.6	986.75	19	26	18.4	578.62	9	14	13.1	630.35	12	20	17.3	371.61	6	11	10.9	0.677419	1.8	1.75	1.40914
Q91VI7	Ribonuclease inhibitor OS=Mus musculus GN=Rnh1 PE=1 SV=1	48.69	1	1	2.2					167.29	3	7	18.2	204.35	3	8	22.6	117	2	3	8.8	117.95	2	2	4.8	2	0.888889	1.33333	1.40741
B2RUC7	Serine-threonine kinase receptor-associated protein OS=Mus musculus GN=Strap PE=1 SV=1	689.6	11	13	45.4	401.17	7	9	35.7	496.73	7	9	35.1	283.63	5	7	31.1	410.06	8	10	43.7	240.58	4	6	25.4	1.4	1.25	1.57143	1.40714
Q4KL82	Replication factor C (Activator 1) 2 OS=Mus musculus GN=Rfc2 PE=1 SV=1	958.22	15	22	63.6	564.97	9	14	41.3	714.97	12	12	36.1	399.85	8	10	39.3	531.24	10	14	52.4	461.65	9	9	32.1	1.53333	1.18182	1.5	1.40505
P38647	Stress-70 protein, mitochondrial OS=Mus musculus GN=Hspa9 PE=1 SV=3	477.76	8	14	24.2	325.48	6	9	16.9	495.09	8	11	21.5	296.67	6	6	14.3	772.53	13	15	30.6	670.84	11	15	32.5	1.5	1.71429	1	1.40476
Q6DID3	Protein SCAF8 OS=Mus musculus GN=Scaf8 PE=1 SV=1	43.23	1	5	5	44.99	1	2	1.7	138.27	3	4	4.6	78.52	2	6	6.9	50.89	1	2	1.7	35.88	1	1	1.9	2	0.714286	1.5	1.40476
Q9D706	RNA polymerase II-associated protein 3 OS=Mus musculus GN=Rpap3 PE=1 SV=1	165.21	3	10	20.2	309.54	6	9	17.3	1041.16	20	24	46.7	463.85	10	16	28.3	704.61	14	22	29.5	508.63	9	13	29.2	1.1	1.47059	1.64286	1.40448
H7BWY4	Disks large homolog 1 OS=Mus musculus GN=Dlg1 PE=1 SV=1	517.96	8	12	18.7	442.85	6	9	15.6	257.83	6	8	12	169.38	4	6	8.7	383.15	6	12	19	315.71	6	7	11	1.3	1.28571	1.625	1.40357
Q9DC51	Guanine nucleotide-binding protein G(k) subunit alpha OS=Mus musculus GN=Gnai3 PE=1 SV=3	234.35	4	7	18.4	176.26	3	3	9.9	643.9	11	13	37.9	581.54	10	10	31.4	576.36	11	13	37.9	689.97	13	14	32.5	2	1.27273	0.933333	1.40202
Q8CG48	Structural maintenance of chromosomes protein 2 OS=Mus musculus GN=Smc2 PE=1 SV=2	1314.53	21	28	24.6	665.84	12	22	24.3	1823.46	33	46	35.2	987.15	18	25	24.1	1789.56	30	41	35.2	1409.68	28	36	33.4	1.26087	1.80769	1.13514	1.40123
F8VQE9	Arf-GAP with GTPase, ANK repeat and PH domain-containing protein 3 OS=Mus musculus GN=Agap3 PE=1 SV=1	463.06	7	8	10.4	227.17	4	5	8.7	366.95	7	8	12.7	163.53	3	4	7.3	326.08	7	8	10.8	268.5	6	9	14.6	1.5	1.8	0.9	1.4
Q3U3A7	Metastasis-associated protein MTA3 OS=Mus musculus GN=Mta3 PE=1 SV=1					92.88	2	4	12.1									42.35	1	2	12.7					0.2	1	3	1.4
Q8BKH7	Target of rapamycin complex 2 subunit MAPKAP1 OS=Mus musculus GN=Mapkap1 PE=1 SV=1	215.6	3	6	14.9	106.06	2	4	9.8	211.46	4	5	11.5	157.42	3	4	12.1	267.81	5	7	13.2	106.56	2	4	11.1	1.4	1.2	1.6	1.4
Q02257	Junction plakoglobin OS=Mus musculus GN=Jup PE=1 SV=3	304.42	6	14	22.8	105.69	2	8	10.6	175.31	3	4	6	81.87	1	2	3.9	126.96	2	5	7.9	243.52	5	6	10.2	1.66667	1.66667	0.857143	1.39683
A2BFF5	Cytoplasmic dynein 1 intermediate chain 2 OS=Mus musculus GN=Dync1i2 PE=1 SV=1									304.89	5	6	10.4	131.16	1	2	7.7	74.02	2	5	10.7	206.31	3	6	11.8	1	2.33333	0.857143	1.39683
P80316	T-complex protein 1 subunit epsilon OS=Mus musculus GN=Cct5 PE=1 SV=1	227.58	4	8	21.4	127.47	2	5	9.6	480.13	10	17	33.1	331.22	8	13	26.2	633.51	12	20	36.8	488.23	10	14	36.6	1.5	1.28571	1.4	1.39524
Q8JZQ9	Eukaryotic translation initiation factor 3 subunit B OS=Mus musculus GN=Eif3b PE=1 SV=1	1869.08	26	36	52.2	1492.17	23	33	43.8	1459.77	25	31	51.4	772.08	11	15	28.9	1161.79	19	25	39.1	1373.72	21	23	35.6	1.08824	2	1.08333	1.39052
Q9D024	Coiled-coil domain-containing protein 47 OS=Mus musculus GN=Ccdc47 PE=1 SV=2									182.42	4	4	8.9	32.35	1	1	1.9	43.98	1	1	1.9	64.73	2	2	6.6	1	2.5	0.666667	1.38889
Q64152	Transcription factor BTF3 OS=Mus musculus GN=Btf3 PE=1 SV=3	159.38	3	4	46.6	40.37	1	2	34.3	348.99	6	7	54.4	182.08	2	5	54.4	284.28	5	6	54.9	218.65	3	5	54.4	1.66667	1.33333	1.16667	1.38889
E9Q600	Lysyl oxidase homolog 4 OS=Mus musculus GN=Loxl4 PE=1 SV=1									169.76	3	4	7	78.96	1	2	4.4	254.72	5	5	9.8	157.62	3	3	5.7	1	1.66667	1.5	1.38889
P09103	Protein disulfide-isomerase OS=Mus musculus GN=P4hb PE=1 SV=2	306.48	6	15	31.4	250.44	5	8	21.2	396.99	7	10	20	272.65	5	8	18.3	249.12	5	6	14.5	88.09	3	5	15.3	1.77778	1.22222	1.16667	1.38889
P70333	Heterogeneous nuclear ribonucleoprotein H2 OS=Mus musculus GN=Hnrnph2 PE=1 SV=1	608.81	9	13	35.6	556.7	8	11	29.8	500.93	8	11	33.2	359.75	5	6	20.5	486.09	7	8	22.7	382.05	5	6	20.9	1.16667	1.71429	1.28571	1.38889
Q3UVV9	von Willebrand factor A domain-containing protein 3A OS=Mus musculus GN=Vwa3a PE=2 SV=1	51.59	1	4	4	54.3	1	2	1.6	29.09	1	1	1.6									27.02	1	1	2.2	1.66667	2	0.5	1.38889
Q4VAG4	60S ribosomal protein L22 OS=Mus musculus GN=Rpl22 PE=1 SV=1	415.4	6	8	45.3	388.22	5	5	44.5	394.68	7	9	49.2	344.36	5	5	43.8	358.11	5	7	54.7	444.55	6	7	54.7	1.5	1.66667	1	1.38889
Q8BFX3	BTB/POZ domain-containing protein KCTD3 OS=Mus musculus GN=Kctd3 PE=2 SV=1									34.93	1	2	2.3									120.77	3	5	8.5	1	3	0.166667	1.38889
Q8C3F2	Constitutive coactivator of PPAR-gamma-like protein 2 OS=Mus musculus GN=Fam120c PE=1 SV=3					142.6	2	5	7.6	26.32	1	2	3.7													0.166667	3	1	1.38889
Q5F2E7	Nuclear fragile X mental retardation-interacting protein 2 OS=Mus musculus GN=Nufip2 PE=1 SV=1	724.9	9	18	27.9	710.15	9	13	26.4	1055.33	16	19	34.5	660.71	9	11	23.7	969.4	13	16	33.2	912.51	12	14	32.5	1.35714	1.66667	1.13333	1.38571
P21956	Lactadherin OS=Mus musculus GN=Mfge8 PE=1 SV=3	1013.87	16	23	36.1	359.29	6	11	22.7	707.55	13	18	34.6	552.14	10	14	38.7	969.18	16	21	40.2	1019.48	18	24	43.8	2	1.26667	0.88	1.38222
P07742	Ribonucleoside-diphosphate reductase large subunit OS=Mus musculus GN=Rrm1 PE=1 SV=2									105.84	3	3	6.3	29.23	1	1	2.3	257.47	5	7	11.4	155.42	5	6	11.2	1	2	1.14286	1.38095
Q5SS83	Flotillin 2, isoform CRA_a OS=Mus musculus GN=Flot2 PE=1 SV=1					83.98	2	6	21.7	38.12	1	2	11.9					34.58	1	1	7.5	54.56	1	1	5.8	0.142857	3	1	1.38095
Q5SYD0	Unconventional myosin-Id OS=Mus musculus GN=Myo1d PE=1 SV=1	3085.79	49	65	52.3	1052.92	19	35	42.1	2340.77	45	50	50.6	1872.66	35	44	49.9	2599.83	46	60	55.4	2432.56	45	51	53.4	1.83333	1.13333	1.17308	1.37991
Q6F4J1	Tubulin gamma chain OS=Mus musculus GN=Tubg1 PE=1 SV=1	1697.94	24	34	54.1	1152.09	15	24	45.7	1894.73	29	39	75.2	974.97	18	22	48.6	992.98	19	25	52.5	758.73	14	25	60.5	1.4	1.73913	1	1.37971
G3XA57	Rab11 family-interacting protein 2 OS=Mus musculus GN=Rab11fip2 PE=1 SV=1									360.98	8	8	23	127.35	3	4	10.5	255.06	5	7	19.5	190.54	4	5	16.4	1	1.8	1.33333	1.37778
Q8BGD9	Eukaryotic translation initiation factor 4B OS=Mus musculus GN=Eif4b PE=1 SV=1	590.75	9	19	30.9	483.28	8	14	29.6	404.41	7	9	18.2	129.57	2	4	9.5	361.24	7	7	16.7	385.35	7	9	17	1.33333	2	0.8	1.37778
Q9CQF3	Cleavage and polyadenylation specificity factor subunit 5 OS=Mus musculus GN=Nudt21 PE=1 SV=1	292.91	5	6	27.3	280.03	4	6	27.3	361.58	7	8	30.4	229.98	4	4	28.6	207.97	4	7	37	154	4	5	28.6	1	1.8	1.33333	1.37778
P62983	Ubiquitin-40S ribosomal protein S27a OS=Mus musculus GN=Rps27a PE=1 SV=2	477.95	7	9	54.5	328.25	6	9	57.7	607.36	11	12	54.5	250.68	5	7	54.5	247	4	8	44.2	215.26	3	5	41.7	1	1.625	1.5	1.375
Q7TMB8	Cytoplasmic FMR1-interacting protein 1 OS=Mus musculus GN=Cyfip1 PE=1 SV=1	391.67	6	16	17.5	254.75	5	10	10.5	686.01	14	18	16.8	372.86	8	14	13.1	743.45	15	20	18.6	536.24	11	15	14.4	1.54545	1.26667	1.3125	1.37487
Q3TU85	Heat shock 70 kDa protein 1A OS=Mus musculus GN=Hspa1b PE=1 SV=1	219.13	4	7	15.1	148.41	2	3	10	248.27	4	6	13.6	218.39	4	4	9.8	174.08	3	4	8.9	257.39	4	6	15	2	1.4	0.714286	1.37143
A2A5R8	Double-stranded RNA-binding protein Staufen homolog 1 OS=Mus musculus GN=Stau1 PE=1 SV=1	953.16	14	22	42.7	854.53	14	21	41.2	1128.6	20	24	47.2	364.65	8	12	29.1	1036.43	20	24	42.7	832.82	18	21	42.7	1.04545	1.92308	1.13636	1.3683
Q9D0R8	Protein LSM12 homolog OS=Mus musculus GN=Lsm12 PE=1 SV=1	327.81	4	4	22.6	135.58	2	2	13.8	307.64	6	7	42.1	163.6	3	4	33.3	136.83	3	4	21	116.69	3	5	29.7	1.66667	1.6	0.833333	1.36667
P10922	Histone H1.0 OS=Mus musculus GN=H1f0 PE=2 SV=4	164.84	3	5	27.3	60.52	1	2	10.8	150.65	3	5	26.3	151.02	3	3	16	128.4	2	2	16	28.15	1	4	22.7	2	1.5	0.6	1.36667
Q3UCW0	MCG123182 OS=Mus musculus GN=Tsg101 PE=1 SV=1	200.33	4	7	21	155.67	3	4	14.1	371.81	8	8	21.5	233.55	4	5	15.3	290.01	6	6	18.4	229.52	4	6	18.9	1.6	1.5	1	1.36667
Q3U1S6	Cold shock domain-containing protein E1 OS=Mus musculus GN=Csde1 PE=1 SV=1	820.42	13	22	32.3	576.59	10	15	22.7	1097.84	23	30	37.1	822.48	17	19	26.7	795.96	18	21	29.7	669.92	15	19	27.9	1.4375	1.55	1.1	1.3625
Q4FJX4	Csrp1 protein OS=Mus musculus GN=Csrp1 PE=1 SV=1	73.71	2	2	19.2					44.12	1	2	19.2	171.16	3	3	28					91.7	2	2	19.2	3	0.75	0.333333	1.36111
A0A087WNW3	Kinectin OS=Mus musculus GN=Ktn1 PE=1 SV=1	102.46	2	9	9.6	43.7	1	10	10.5					118.07	3	5	6.7	185.15	4	8	12	113.92	2	2	3.2	0.909091	0.166667	3	1.35859
Q9Z2X8	Kelch-like ECH-associated protein 1 OS=Mus musculus GN=Keap1 PE=1 SV=1	185.1	4	10	16.8	147.22	3	8	14.9	187.87	4	7	13.5	120.53	3	4	8	231.14	5	9	16.8	244.43	6	7	12.7	1.22222	1.6	1.25	1.35741
Q9CQU3	Protein RER1 OS=Mus musculus GN=Rer1 PE=1 SV=1	106.41	2	3	24.5	221.18	3	6	33.7	248.66	4	4	25	59.71	1	1	9.7	56.02	1	2	15.3	72.12	1	2	14.8	0.571429	2.5	1	1.35714
A2AUX3	Disabled homolog 2-interacting protein OS=Mus musculus GN=Dab2ip PE=1 SV=1									247.24	5	6	8.1	116.53	3	4	5	98.48	3	4	6.6	73.47	2	2	3.2	1	1.4	1.66667	1.35556
Q76MZ3	Serine/threonine-protein phosphatase 2A 65 kDa regulatory subunit A alpha isoform OS=Mus musculus GN=Ppp2r1a PE=1 SV=3	318.52	6	6	14.9	212.48	3	5	13.9	673.23	15	18	35.5	363.47	6	9	20.7	824.37	14	17	36.5	574.36	12	17	30.2	1.16667	1.9	1	1.35556
Q9JKB3	Y-box-binding protein 3 OS=Mus musculus GN=Ybx3 PE=1 SV=2	1180	15	19	54.3	694.7	11	13	54.3	1039.8	15	17	55.1	534.47	8	10	36	444.13	7	8	39.1	390.41	6	8	32.7	1.42857	1.63636	1	1.35498
Q9QXN3	Activating signal cointegrator 1 OS=Mus musculus GN=Trip4 PE=1 SV=2	416.4	9	15	27.7	329.44	7	12	21.2	283.23	7	10	22.4	83.6	2	5	13.1	187.75	4	9	20.5	233.81	6	9	18.9	1.23077	1.83333	1	1.3547
P62918	60S ribosomal protein L8 OS=Mus musculus GN=Rpl8 PE=1 SV=2	650.26	9	18	54.1	428.67	6	9	23.7	1081.81	18	23	58.4	1019.92	19	22	48.6	1017.56	16	18	49.8	830.94	14	16	38.9	1.9	1.04348	1.11765	1.35371
P52479	Ubiquitin carboxyl-terminal hydrolase 10 OS=Mus musculus GN=Usp10 PE=1 SV=3	397.02	7	10	15.9	368.63	7	8	12.4	392.02	9	10	17.2	172.86	4	5	7.7	450.67	9	14	23.5	425.52	10	14	26.4	1.22222	1.83333	1	1.35185
Q03141	MAP/microtubule affinity-regulating kinase 3 OS=Mus musculus GN=Mark3 PE=1 SV=2	416.04	8	15	24.4	662.87	11	24	34.8	616.27	12	17	30.3	306.3	5	9	11.6	856.76	18	20	28	374.66	6	12	18.2	0.64	1.8	1.61538	1.35179
Q3UM18	Large subunit GTPase 1 homolog OS=Mus musculus GN=Lsg1 PE=1 SV=2	56.8	1	4	5.6	50.03	1	3	7.8	232.82	5	6	10.2	65.2	2	4	6.5	232.91	5	6	12.1	135.65	3	4	7	1.25	1.4	1.4	1.35
Q8VC70	RNA-binding motif, single-stranded-interacting protein 2 OS=Mus musculus GN=Rbms2 PE=1 SV=1	450.14	6	9	28.5	410.25	5	7	25.1	436.26	6	8	26.6	199.48	4	4	17.2	295.7	5	5	21.1	135.14	3	5	17.5	1.25	1.8	1	1.35
P34152	Focal adhesion kinase 1 OS=Mus musculus GN=Ptk2 PE=1 SV=3	62.67	1	5	6.1	44.5	1	4	5.7	420.98	7	11	13.1	233.14	4	6	9	281.22	5	8	14.4	234.19	4	7	9.4	1.2	1.71429	1.125	1.34643
F8VPP8	Protein Zc3h7b OS=Mus musculus GN=Zc3h7b PE=1 SV=1	193.93	4	8	10	143.64	3	6	7.9	192.94	4	6	7.8	40.95	1	3	3.7	203.1	5	6	6.5	127.86	3	6	7.3	1.28571	1.75	1	1.34524
Q4FJK0	2,4-dienoyl-CoA reductase, mitochondrial OS=Mus musculus GN=Decr1 PE=1 SV=1	426.66	7	11	40.9	400.23	6	9	42.4	357.98	7	10	37.9	190.21	3	5	23	283.85	5	6	27.2	290.84	5	6	31	1.2	1.83333	1	1.34444
D3Z5I1	Zinc finger CCCH-type antiviral protein 1 OS=Mus musculus GN=Zc3hav1 PE=1 SV=1	908.04	15	22	29.7	809.43	14	19	23	759.13	15	19	23.6	451.97	9	10	14.9	683.36	13	16	19.5	653.77	13	15	18.4	1.15	1.81818	1.0625	1.34356
F7A6H4	E3 ubiquitin-protein ligase RNF213 OS=Mus musculus GN=Rnf213 PE=1 SV=2					986.77	16	55	12.9									89.11	2	5	2	25.94	1	1	1	0.0178571	1	3	1.33929
Q9DBR1	5~-3~ exoribonuclease 2 OS=Mus musculus GN=Xrn2 PE=1 SV=1	578.39	10	14	21.1	322.05	4	11	14.3	371.91	7	13	17.8	201.82	5	8	12.1	352.44	8	11	16.6	278.97	4	9	15.7	1.25	1.55556	1.2	1.33519
Q8BYN2	DNA segment, Chr 2, ERATO Doi 435, expressed, isoform CRA_e OS=Mus musculus GN=Tubgcp4 PE=1 SV=1	709.91	11	14	30.6	579.42	9	13	27.2	1206.75	22	23	40.5	351.79	5	12	25.8	332.96	7	12	23.9	349.71	8	11	25.7	1.07143	1.84615	1.08333	1.33364
P19182	Interferon-related developmental regulator 1 OS=Mus musculus GN=Ifrd1 PE=1 SV=2																	106.11	1	1	6.5					1	1	2	1.33333
A0A087WNM5	Protein Aamp (Fragment) OS=Mus musculus GN=Aamp PE=1 SV=4									94.44	1	1	10.3													1	2	1	1.33333
G3X977	Inter-alpha trypsin inhibitor, heavy chain 2 OS=Mus musculus GN=Itih2 PE=1 SV=1									80.83	1	1	2.6													1	2	1	1.33333
D3Z1N2	RING finger protein 10 OS=Mus musculus GN=Rnf10 PE=1 SV=1																	80.68	1	1	1.5					1	1	2	1.33333
F2Z4B7	Protein Raph1 OS=Mus musculus GN=Raph1 PE=1 SV=1									80.26	1	1	3.1													1	2	1	1.33333
F6WP10	Peptidyl-prolyl cis-trans isomerase FKBP8 (Fragment) OS=Mus musculus GN=Fkbp8 PE=1 SV=1									80.25	1	1	44.4													1	2	1	1.33333
A0A0A6YWT2	Protein Pabpc4l (Fragment) OS=Mus musculus GN=Pabpc4l PE=4 SV=1	75.76	1	1	15.1																					2	1	1	1.33333
Q8BHI7	Elongation of very long chain fatty acids protein 5 OS=Mus musculus GN=Elovl5 PE=1 SV=1									75.65	1	1	9													1	2	1	1.33333
F6W8Y8	Protein kinase C and casein kinase II substrate protein 3 (Fragment) OS=Mus musculus GN=Pacsin3 PE=1 SV=1																	74.98	1	1	17.3					1	1	2	1.33333
Q9DB90	Protein SMG9 OS=Mus musculus GN=Smg9 PE=1 SV=1									73.44	1	1	3.1													1	2	1	1.33333
Q8BUE4	Apoptosis-inducing factor 2 OS=Mus musculus GN=Aifm2 PE=1 SV=1	70.16	1	1	4.8																					2	1	1	1.33333
Q810L3	E3 ubiquitin-protein ligase CHFR OS=Mus musculus GN=Chfr PE=1 SV=1																	70.15	1	1	1.8					1	1	2	1.33333
Q8VD65	Phosphoinositide 3-kinase regulatory subunit 4 OS=Mus musculus GN=Pik3r4 PE=1 SV=3									68.32	1	1	2.9													1	2	1	1.33333
A0A0A6YXS5	Type I inositol 3,4-bisphosphate 4-phosphatase OS=Mus musculus GN=Inpp4a PE=1 SV=1																	68.22	1	1	4.2					1	1	2	1.33333
B1APX2	Protein 5031439G07Rik OS=Mus musculus GN=5031439G07Rik PE=1 SV=1									129.02	3	5	17.4	57.65	1	2	5.1	201.09	3	3	7.2	72.66	2	3	7.4	1	2	1	1.33333
Q8BH15	CCR4-NOT transcription complex subunit 10 OS=Mus musculus GN=Cnot10 PE=1 SV=1	259.26	5	6	12.8	103.86	2	4	6.7	220.7	5	6	13.2	114.55	3	4	7.3	142.34	3	5	7.8	58.7	1	4	6	1.4	1.4	1.2	1.33333
Q8BN58	Rho GTPase-activating protein 28 OS=Mus musculus GN=Arhgap28 PE=1 SV=1	63.98	1	1	4.4																					2	1	1	1.33333
Q921G9	Tight junction protein 3 OS=Mus musculus GN=Tjp3 PE=1 SV=1	63.15	1	1	2.5																					2	1	1	1.33333
A0A0A6YWG8	Actin-like protein 6A (Fragment) OS=Mus musculus GN=Actl6a PE=1 SV=1																	63.06	1	1	5.7					1	1	2	1.33333
P13542	Myosin-8 OS=Mus musculus GN=Myh8 PE=2 SV=2									62.76	1	1	1.3													1	2	1	1.33333
E9Q2M5	PERQ amino acid-rich with GYF domain-containing protein 2 (Fragment) OS=Mus musculus GN=Gigyf2 PE=1 SV=1	497.69	10	11	18.9	210.78	4	8	20.1	302.18	7	9	23.3	170.09	3	5	17.5									1.33333	1.66667	1	1.33333
A0A087WNX9	BAG family molecular chaperone regulator 2 OS=Mus musculus GN=Bag2 PE=1 SV=1																	61.66	1	1	19.3					1	1	2	1.33333
Q9Z2D8	Methyl-CpG-binding domain protein 3 OS=Mus musculus GN=Mbd3 PE=1 SV=1									61.31	1	1	19.3													1	2	1	1.33333
Q9D0P8	Intraflagellar transport protein 27 homolog OS=Mus musculus GN=Ift27 PE=1 SV=1									60.67	1	1	12.4													1	2	1	1.33333
D3Z5M8	Receptor protein-tyrosine kinase (Fragment) OS=Mus musculus GN=Fgfr2 PE=1 SV=1																	60.49	1	1	2					1	1	2	1.33333
F8WHF9	Splicing factor 1 OS=Mus musculus GN=Sf1 PE=1 SV=1	60.46	1	1	20																					2	1	1	1.33333
P21550	Beta-enolase OS=Mus musculus GN=Eno3 PE=1 SV=3									60.44	1	1	4.8													1	2	1	1.33333
B2RUK5	Methylcrotonoyl-CoA carboxylase beta chain, mitochondrial OS=Mus musculus GN=Mccc2 PE=1 SV=1									59.79	1	1	3.4													1	2	1	1.33333
Q3TC45	Protein S100-A10 OS=Mus musculus GN=S100a10 PE=1 SV=1																	59.75	1	1	17.5					1	1	2	1.33333
Z4YM25	Pre-mRNA-splicing factor SLU7 (Fragment) OS=Mus musculus GN=Slu7 PE=1 SV=1	59.24	1	1	1.8																					2	1	1	1.33333
Q3TRE6	Disabled homolog 2 OS=Mus musculus GN=Dab2 PE=1 SV=1																	58.75	1	1	3.5					1	1	2	1.33333
A0A087WRM2	Integral membrane protein 2C OS=Mus musculus GN=Itm2c PE=1 SV=1									58.7	1	1	12.9													1	2	1	1.33333
Q9WVB4	Slit homolog 3 protein OS=Mus musculus GN=Slit3 PE=2 SV=2									58.42	1	1	1.7													1	2	1	1.33333
P05202	Aspartate aminotransferase, mitochondrial OS=Mus musculus GN=Got2 PE=1 SV=1																	58.35	1	1	3.3					1	1	2	1.33333
Q9D1N9	39S ribosomal protein L21, mitochondrial OS=Mus musculus GN=Mrpl21 PE=1 SV=1									57.87	1	1	4.3													1	2	1	1.33333
P11214	Tissue-type plasminogen activator OS=Mus musculus GN=Plat PE=1 SV=3	57.2	1	1	1.8																					2	1	1	1.33333
G3UVV4	Hexokinase OS=Mus musculus GN=Hk1 PE=1 SV=1																	56.34	1	1	2.6					1	1	2	1.33333
Q8VC57	BTB/POZ domain-containing protein KCTD5 OS=Mus musculus GN=Kctd5 PE=1 SV=1									56.31	1	1	5.1													1	2	1	1.33333
A0A0G2JEA5	Uncharacterized protein OS=Mus musculus PE=3 SV=1									54.44	1	1	2.4					114.5	2	2	3.9	61.51	2	2	3.9	1	2	1	1.33333
Q9Z129	ATP-dependent DNA helicase Q1 OS=Mus musculus GN=Recql PE=1 SV=2	135.33	2	3	8	43.34	1	1	2.9																	2	1	1	1.33333
Q505D7	Optic atrophy 3 protein homolog OS=Mus musculus GN=Opa3 PE=1 SV=1									55.37	1	1	10.6													1	2	1	1.33333
Q8C4B4	Protein unc-119 homolog B OS=Mus musculus GN=Unc119b PE=1 SV=1	55.12	1	1	12																					2	1	1	1.33333
F6U415	SWI/SNF-related matrix-associated actin-dependent regulator of chromatin subfamily B member 1 (Fragment) OS=Mus musculus GN=Smarcb1 PE=1 SV=1	55.01	1	1	23.6																					2	1	1	1.33333
Q6ZPL9	ATP-dependent RNA helicase DDX55 OS=Mus musculus GN=Ddx55 PE=1 SV=2																	54.93	1	1	2					1	1	2	1.33333
Q9CQK1	Zinc finger HIT domain-containing protein 3 OS=Mus musculus GN=Znhit3 PE=1 SV=1									54.87	1	1	6													1	2	1	1.33333
A2RSC8	Kinesin-like protein OS=Mus musculus GN=Kif2b PE=2 SV=1									54.71	1	1	3.6													1	2	1	1.33333
D6RG53	Eukaryotic translation initiation factor 6 OS=Mus musculus GN=Eif6 PE=1 SV=1									54.26	1	1	39													1	2	1	1.33333
P33175	Kinesin heavy chain isoform 5A OS=Mus musculus GN=Kif5a PE=1 SV=3	54.24	1	1	2.6																					2	1	1	1.33333
Q61768	Kinesin-1 heavy chain OS=Mus musculus GN=Kif5b PE=1 SV=3	54.24	1	1	3.3																					2	1	1	1.33333
F6SKQ8	Axin-1 (Fragment) OS=Mus musculus GN=Axin1 PE=4 SV=1									54.08	1	1	5.8													1	2	1	1.33333
A0A087WPI4	Protein Ccnyl1 (Fragment) OS=Mus musculus GN=Ccnyl1 PE=1 SV=1									53.86	1	1	9.4													1	2	1	1.33333
G3UXV6	Slit homolog 2 protein OS=Mus musculus GN=Slit2 PE=1 SV=2									53.56	1	1	1.2													1	2	1	1.33333
Q99LI9	Polyribonucleotide 5~-hydroxyl-kinase Clp1 OS=Mus musculus GN=Clp1 PE=1 SV=1																	53.3	1	1	3.8					1	1	2	1.33333
O88951	Protein lin-7 homolog B OS=Mus musculus GN=Lin7b PE=1 SV=2	53.26	1	1	12.1																					2	1	1	1.33333
Q9Z206	Neuroepithelial cell-transforming gene 1 protein OS=Mus musculus GN=Net1 PE=1 SV=2									63.77	1	1	5.5					52.19	1	1	4.5	35.03	1	1	4.2	1	2	1	1.33333
E9Q9Q2	Protein R3hdm1 OS=Mus musculus GN=R3hdm1 PE=1 SV=1									182.24	4	5	7.1	48.95	1	3	6	187.05	4	5	7.7	127.88	3	3	5.1	1	1.5	1.5	1.33333
D6RG49	Protein FAM76B OS=Mus musculus GN=Fam76b PE=1 SV=1									52.75	1	1	4.7													1	2	1	1.33333
F6SZ47	Serine/threonine-protein kinase B-raf (Fragment) OS=Mus musculus GN=Braf PE=1 SV=1																	52.63	1	1	2.9					1	1	2	1.33333
A0A0A0MQN1	Keratinocyte associated protein 2, isoform CRA_c OS=Mus musculus GN=Krtcap2 PE=1 SV=1									52.56	1	1	14.9													1	2	1	1.33333
Q9JJ48	Zinc finger CCCH domain-containing protein 8 OS=Mus musculus GN=Zc3h8 PE=1 SV=2	52.37	1	1	3.9																					2	1	1	1.33333
F6S1S5	H/ACA ribonucleoprotein complex subunit 4 (Fragment) OS=Mus musculus GN=Dkc1 PE=1 SV=1	52.03	1	1	17.6																					2	1	1	1.33333
Q8K1X4	NCK associated protein 1 like OS=Mus musculus GN=Nckap1l PE=1 SV=1																	52.02	1	1	1.3					1	1	2	1.33333
Q9QUI1	Protein FAM89B OS=Mus musculus GN=Fam89b PE=1 SV=1																	51.68	1	1	11.1					1	1	2	1.33333
V9GWX8	Collagen alpha-1(XI) chain (Fragment) OS=Mus musculus GN=Col11a1 PE=1 SV=1	51.45	1	1	5.4																					2	1	1	1.33333
D3YWZ0	F-box/LRR-repeat protein 3 (Fragment) OS=Mus musculus GN=Fbxl3 PE=4 SV=1																	51.21	1	1	9					1	1	2	1.33333
D3Z654	Lymphoid enhancer binding factor 1, isoform CRA_d OS=Mus musculus GN=Lef1 PE=4 SV=1	51.09	1	1	6																					2	1	1	1.33333
Q8R5F7	Interferon-induced helicase C domain-containing protein 1 OS=Mus musculus GN=Ifih1 PE=1 SV=1									50.77	1	1	1.4													1	2	1	1.33333
Q3TM70	EH domain-containing protein 4 OS=Mus musculus GN=Ehd4 PE=1 SV=1	50.68	1	1	4.4																					2	1	1	1.33333
Q6A026	Sister chromatid cohesion protein PDS5 homolog A OS=Mus musculus GN=Pds5a PE=1 SV=3									101.85	2	3	2.4	48.82	1	2	2	110.71	3	4	4	43.4	1	2	2.3	1	1.33333	1.66667	1.33333
P54071	Isocitrate dehydrogenase [NADP], mitochondrial OS=Mus musculus GN=Idh2 PE=1 SV=3									50.51	1	1	3.5													1	2	1	1.33333
A0A0G2JFG3	Calponin-3 (Fragment) OS=Mus musculus GN=Cnn3 PE=1 SV=1																	50.39	1	1	50					1	1	2	1.33333
E9PVS0	Interferon-related developmental regulator 1 (Fragment) OS=Mus musculus GN=Ifrd1 PE=1 SV=1									49.93	1	1	14.3													1	2	1	1.33333
Q6PCM2	Integrator complex subunit 6 OS=Mus musculus GN=Ints6 PE=1 SV=1	49.87	1	1	2.8																					2	1	1	1.33333
O70230	Zinc finger protein 143 OS=Mus musculus GN=Znf143 PE=1 SV=2									49.84	1	1	4.7													1	2	1	1.33333
Q9D083	Kinetochore protein Spc24 OS=Mus musculus GN=Spc24 PE=1 SV=1									49.47	1	1	5													1	2	1	1.33333
A2AC29	3-beta-hydroxysteroid-Delta(8),Delta(7)-isomerase (Fragment) OS=Mus musculus GN=Ebp PE=1 SV=1									49.36	1	1	10.7													1	2	1	1.33333
F6U539	Histone-binding protein RBBP7 (Fragment) OS=Mus musculus GN=Rbbp7 PE=1 SV=1																	49.26	1	1	25					1	1	2	1.33333
D3YZA1	Chromatin target of PRMT1 protein (Fragment) OS=Mus musculus GN=Chtop PE=1 SV=6	49.16	1	1	10.6																					2	1	1	1.33333
P70459	ETS domain-containing transcription factor ERF OS=Mus musculus GN=Erf PE=1 SV=1									49.12	1	1	2.7													1	2	1	1.33333
E0CYC4	Cyclin-dependent kinase 8 (Fragment) OS=Mus musculus GN=Cdk8 PE=1 SV=1	48.96	1	1	6.1																					2	1	1	1.33333
Q8VEG6	CCR4-NOT transcription complex subunit 6-like OS=Mus musculus GN=Cnot6l PE=1 SV=2	48.88	1	1	2.9																					2	1	1	1.33333
Q3U9E2	Proto-oncogene vav OS=Mus musculus GN=Vav1 PE=1 SV=1	48.78	1	1	1.9																					2	1	1	1.33333
P63300	Selenoprotein W OS=Mus musculus GN=Sepw1 PE=1 SV=3	48.68	1	1	10.2																					2	1	1	1.33333
G3UY30	Protein FAM92A1 (Fragment) OS=Mus musculus GN=Fam92a PE=1 SV=1	48.56	1	1	7.8																					2	1	1	1.33333
D3Z4C9	Ubiquinol-cytochrome-c reductase complex assembly factor 2 OS=Mus musculus GN=Uqcc2 PE=1 SV=1									48.13	1	1	20.5													1	2	1	1.33333
A2AM63	Heterochromatin protein 1-binding protein 3 (Fragment) OS=Mus musculus GN=Hp1bp3 PE=1 SV=1									47.74	1	1	13.5													1	2	1	1.33333
A2AFJ4	Gamma-taxilin OS=Mus musculus GN=Txlng PE=1 SV=1									47.65	1	1	10.4													1	2	1	1.33333
F6T4M4	Serine/arginine repetitive matrix protein 1 (Fragment) OS=Mus musculus GN=Srrm1 PE=1 SV=1									93.42	1	1	15	64.39	1	1	15	64.37	1	1	15					1	1	2	1.33333
E9PZB9	Interferon-related developmental regulator 1 (Fragment) OS=Mus musculus GN=Ifrd1 PE=1 SV=1	47.35	1	1	16.1																					2	1	1	1.33333
D3Z5I9	RNA-binding protein 33 OS=Mus musculus GN=Rbm33 PE=1 SV=1									44.55	1	1	1.7	31.04	1	1	1	55.69	1	1	3.2					1	1	2	1.33333
F8VQ70	Protein Scaper OS=Mus musculus GN=Scaper PE=1 SV=1	47.24	1	1	1.6																					2	1	1	1.33333
D3YTZ8	Ras-related protein Rab-15 OS=Mus musculus GN=Rab15 PE=1 SV=1	47.14	1	1	6.6																					2	1	1	1.33333
A0A087WP03	DnaJ homolog subfamily B member 2 (Fragment) OS=Mus musculus GN=Dnajb2 PE=1 SV=1	47.07	1	1	17.3																					2	1	1	1.33333
E9Q263	Protein unc-13 homolog B OS=Mus musculus GN=Unc13b PE=1 SV=1	46.97	1	1	3																					2	1	1	1.33333
A0A087WPT9	Protein 2410002F23Rik (Fragment) OS=Mus musculus GN=2410002F23Rik PE=1 SV=4	46.91	1	1	8.9																					2	1	1	1.33333
Q8QZT1	Acetyl-CoA acetyltransferase, mitochondrial OS=Mus musculus GN=Acat1 PE=1 SV=1									46.88	1	1	2.8													1	2	1	1.33333
Q5SSL4	Active breakpoint cluster region-related protein OS=Mus musculus GN=Abr PE=1 SV=1	46.78	1	1	2.9																					2	1	1	1.33333
A0A0A6YW74	Kinetochore protein Nuf2 OS=Mus musculus GN=Nuf2 PE=1 SV=1																	46.74	1	1	7.4					1	1	2	1.33333
Q5NCC3	E3 ubiquitin-protein ligase TRIM41 OS=Mus musculus GN=Trim41 PE=1 SV=1	46.24	1	1	3.7																					2	1	1	1.33333
Q52L97	Importin subunit alpha OS=Mus musculus GN=Kpna2 PE=1 SV=1									481.05	8	9	23.6	172.74	4	4	12.9	283.54	5	6	18.7	253.83	6	6	17.4	1	2	1	1.33333
G3X9U9	Fission 1 (Mitochondrial outer membrane) homolog (Yeast), isoform CRA_c OS=Mus musculus GN=Fis1 PE=1 SV=1									45.88	1	1	7.6													1	2	1	1.33333
A0A0K0K1E1	MICOS complex subunit Mic60 (Fragment) OS=Mus musculus GN=Immt PE=1 SV=1									45.8	1	1	7.6													1	2	1	1.33333
Q61647	Hyaluronan synthase 1 OS=Mus musculus GN=Has1 PE=1 SV=1									48.91	1	1	4.5					48.88	1	1	2.9	31	1	1	2.9	1	2	1	1.33333
Q9R1L5	Microtubule-associated serine/threonine-protein kinase 1 OS=Mus musculus GN=Mast1 PE=1 SV=3																	45.59	1	1	1.7					1	1	2	1.33333
Q542P2	Glycoprotein m6a, isoform CRA_b OS=Mus musculus GN=Gpm6a PE=1 SV=1									45.59	1	1	3.6													1	2	1	1.33333
A2A9K3	Centrosomal protein of 85 kDa OS=Mus musculus GN=Cep85 PE=1 SV=1									45.57	1	1	4.9													1	2	1	1.33333
G3X8V5	RIKEN cDNA 2610206B13, isoform CRA_b OS=Mus musculus GN=Rnf219 PE=1 SV=1									45.57	1	1	2.4													1	2	1	1.33333
Q9CYH6	Ribosome biogenesis regulatory protein homolog OS=Mus musculus GN=Rrs1 PE=1 SV=1	45.47	1	1	3																					2	1	1	1.33333
E9PW03	Glycosylphosphatidylinositol anchor attachment 1 protein OS=Mus musculus GN=Gpaa1 PE=1 SV=1																	45.43	1	1	1.6					1	1	2	1.33333
P11416	Retinoic acid receptor alpha OS=Mus musculus GN=Rara PE=1 SV=1	45.4	1	1	1.9																					2	1	1	1.33333
Q924Z5	Translocating chain-associated membrane protein 2 OS=Mus musculus GN=Tram2 PE=1 SV=1									45.37	1	1	2.7													1	2	1	1.33333
S4R1Y5	Ribosome production factor 2 homolog (Fragment) OS=Mus musculus GN=Rpf2 PE=1 SV=1																	45.12	1	1	8.2					1	1	2	1.33333
Q9QZQ8	Core histone macro-H2A.1 OS=Mus musculus GN=H2afy PE=1 SV=3	125.13	3	5	19.1	48.11	1	2	5.4																	2	1	1	1.33333
Q91X78	Erlin-1 OS=Mus musculus GN=Erlin1 PE=1 SV=1	44.74	1	1	6.1																					2	1	1	1.33333
Q8CGF7	Transcription elongation regulator 1 OS=Mus musculus GN=Tcerg1 PE=1 SV=2									44.35	1	1	1.5													1	2	1	1.33333
Q91XW9	MCG133388, isoform CRA_f OS=Mus musculus GN=Pcdhgc5 PE=1 SV=1																	44.26	1	1	3.3					1	1	2	1.33333
Q91XX4	MCG133388, isoform CRA_n OS=Mus musculus GN=Pcdhgb6 PE=1 SV=1																	44.26	1	1	2.5					1	1	2	1.33333
Q91XY0	MCG133388, isoform CRA_m OS=Mus musculus GN=Pcdhga8 PE=2 SV=1																	44.26	1	1	2.3					1	1	2	1.33333
Q91XY8	Protein Pcdhga11 OS=Mus musculus GN=Pcdhga11 PE=2 SV=1																	44.26	1	1	2.3					1	1	2	1.33333
F2Z3U2	SET-binding protein OS=Mus musculus GN=Setbp1 PE=1 SV=1	43.69	1	1	1.4																					2	1	1	1.33333
F6QNU4	N-alpha-acetyltransferase 30 (Fragment) OS=Mus musculus GN=Naa30 PE=1 SV=1	43.45	1	1	52.9																					2	1	1	1.33333
E0CYT1	Serine/threonine-protein kinase WNK2 OS=Mus musculus GN=Wnk2 PE=1 SV=1	43.27	1	1	0.3																					2	1	1	1.33333
F6U6G6	Tripartite motif-containing protein 35 (Fragment) OS=Mus musculus GN=Trim35 PE=1 SV=1																	43.19	1	1	4.7					1	1	2	1.33333
O35317	Pre-B-cell leukemia transcription factor 3 OS=Mus musculus GN=Pbx3 PE=2 SV=1	43.13	1	1	4.4																					2	1	1	1.33333
Q8BME9	Cerebellin-4 OS=Mus musculus GN=Cbln4 PE=1 SV=1																	43.07	1	1	3.5					1	1	2	1.33333
Q9JJD0	THAP domain-containing protein 11 OS=Mus musculus GN=Thap11 PE=1 SV=1									43.07	1	1	2.6													1	2	1	1.33333
A0A087WNZ7	E3 ubiquitin-protein ligase TRIP12 OS=Mus musculus GN=Trip12 PE=1 SV=1									42.96	1	1	0.5													1	2	1	1.33333
P08030	Adenine phosphoribosyltransferase OS=Mus musculus GN=Aprt PE=1 SV=2									42.64	1	1	11.1													1	2	1	1.33333
F8WIT2	Annexin OS=Mus musculus GN=Anxa6 PE=1 SV=1	42.63	1	1	5.4																					2	1	1	1.33333
G3UWG1	MCG115977 OS=Mus musculus GN=Gm10108 PE=3 SV=1	42.62	1	1	7.6																					2	1	1	1.33333
B0QZH1	Prolyl 4-hydroxylase subunit alpha-2 (Fragment) OS=Mus musculus GN=P4ha2 PE=1 SV=1									42.55	1	1	15.7													1	2	1	1.33333
I7HIK9	Cellular tumor antigen p53 OS=Mus musculus GN=Trp53 PE=1 SV=1	915.02	14	15	49.2	275.41	4	9	36.2	786.33	13	15	52.9	592.69	11	15	56.3	790.05	15	20	57.4	630.61	12	14	50.5	1.6	1	1.4	1.33333
Q04841	DNA-3-methyladenine glycosylase OS=Mus musculus GN=Mpg PE=2 SV=3																	42.21	1	1	5.7					1	1	2	1.33333
O70472	Transmembrane protein 131 OS=Mus musculus GN=Tmem131 PE=2 SV=2	42.13	1	1	1.4																					2	1	1	1.33333
D3Z483	Guanine nucleotide-binding protein subunit gamma (Fragment) OS=Mus musculus GN=Gng7 PE=1 SV=1	42.06	1	1	18.4																					2	1	1	1.33333
Q6VH22	Intraflagellar transport protein 172 homolog OS=Mus musculus GN=Ift172 PE=1 SV=1	41.97	1	1	1.4																					2	1	1	1.33333
D3Z026	PIH1 domain-containing protein 1 (Fragment) OS=Mus musculus GN=Pih1d1 PE=1 SV=1	41.89	1	1	17.1																					2	1	1	1.33333
A2BH40	AT-rich interactive domain-containing protein 1A OS=Mus musculus GN=Arid1a PE=1 SV=1									41.79	1	1	0.6													1	2	1	1.33333
F6USW7	Nucleolar protein 56 (Fragment) OS=Mus musculus GN=Nop56 PE=1 SV=1	75.9	1	1	20													42.2	1	1	11.2	47.29	1	1	11.2	2	1	1	1.33333
Q6PG04	Coiled-coil domain-containing protein 82 OS=Mus musculus GN=Ccdc82 PE=2 SV=1																	41.51	1	1	4.1					1	1	2	1.33333
K4DI67	Condensin-2 complex subunit D3 OS=Mus musculus GN=Ncapd3 PE=1 SV=1																	41.48	1	1	1					1	1	2	1.33333
Q8BZ47	Zinc finger protein 609 OS=Mus musculus GN=Znf609 PE=1 SV=2									41.32	1	1	1.2													1	2	1	1.33333
F6XRE6	V-type proton ATPase subunit a (Fragment) OS=Mus musculus GN=Tcirg1 PE=1 SV=1	41.22	1	1	6.3																					2	1	1	1.33333
H3BKT5	Adenosylhomocysteinase OS=Mus musculus GN=Ahcyl2 PE=1 SV=1									41.2	1	1	6.4													1	2	1	1.33333
A4GZ26	ARF6 guanine nucleotide exchange factor IQArfGEF OS=Mus musculus GN=Iqsec2 PE=1 SV=1	41.1	1	1	3.4																					2	1	1	1.33333
Q3T9A5	Glomulin OS=Mus musculus GN=Glmn PE=1 SV=1	41.02	1	1	1.3																					2	1	1	1.33333
F6TDS3	Protein Qars (Fragment) OS=Mus musculus GN=Qars PE=1 SV=1																	40.68	1	1	11.8					1	1	2	1.33333
J3QK54	Protein Fignl2 OS=Mus musculus GN=Fignl2 PE=4 SV=1	40.58	1	1	3																					2	1	1	1.33333
Q5SUV5	Myosin light chain kinase family member 4 OS=Mus musculus GN=Mylk4 PE=1 SV=2	40.45	1	1	1.8																					2	1	1	1.33333
G3X9L9	Myomegalin OS=Mus musculus GN=Pde4dip PE=1 SV=1	40.44	1	1	2.3																					2	1	1	1.33333
D3YUZ0	Coiled-coil domain containing 83, isoform CRA_c OS=Mus musculus GN=Ccdc83 PE=4 SV=1	40.31	1	1	4.2																					2	1	1	1.33333
Q62469	Integrin alpha-2 OS=Mus musculus GN=Itga2 PE=1 SV=2	40.31	1	1	1.8																					2	1	1	1.33333
Q6PD03	Serine/threonine-protein phosphatase 2A 56 kDa regulatory subunit alpha isoform OS=Mus musculus GN=Ppp2r5a PE=1 SV=1	40.27	1	1	3.5																					2	1	1	1.33333
A0A087WPF9	Basic leucine zipper and W2 domain-containing protein 1 (Fragment) OS=Mus musculus GN=Bzw1 PE=1 SV=1																	40.27	1	1	4					1	1	2	1.33333
A2AG41	Stomatin-like protein 2, mitochondrial (Fragment) OS=Mus musculus GN=Stoml2 PE=1 SV=8									40.16	1	1	7.1													1	2	1	1.33333
O88630	Golgi SNAP receptor complex member 1 OS=Mus musculus GN=Gosr1 PE=1 SV=2									40.11	1	1	9.2													1	2	1	1.33333
D6RG80	Transmembrane and TPR repeat-containing protein 1 OS=Mus musculus GN=Tmtc1 PE=1 SV=1									40.03	1	1	1.4													1	2	1	1.33333
Q3U0I9	Sorting nexin-8 OS=Mus musculus GN=Snx8 PE=1 SV=1									40.03	1	1	3.2													1	2	1	1.33333
E9Q0G0	Protein 4932415D10Rik OS=Mus musculus GN=4932415D10Rik PE=4 SV=1	39.9	1	1	2.8																					2	1	1	1.33333
Q5ND29	Rab-interacting lysosomal protein OS=Mus musculus GN=Rilp PE=1 SV=1	39.83	1	1	4.3																					2	1	1	1.33333
Q8CAK3	UPF0515 protein C19orf66 homolog OS=Mus musculus PE=2 SV=1	39.78	1	1	2.4																					2	1	1	1.33333
E9PX57	Kinesin-like protein OS=Mus musculus GN=Kif6 PE=3 SV=1																	39.77	1	1	2.1					1	1	2	1.33333
Q9DB28	Ribonuclease P/MRP protein subunit POP5 OS=Mus musculus GN=Pop5 PE=1 SV=1									39.73	1	1	4.1													1	2	1	1.33333
Q8BH57	WD repeat-containing protein 48 OS=Mus musculus GN=Wdr48 PE=1 SV=1									39.67	1	1	2.1													1	2	1	1.33333
F7BLS8	NADH dehydrogenase [ubiquinone] 1 alpha subcomplex subunit 3 (Fragment) OS=Mus musculus GN=Ndufa3 PE=4 SV=1									39.35	1	1	16.7													1	2	1	1.33333
Q6IFX3	Keratin, type I cytoskeletal 40 OS=Mus musculus GN=Krt40 PE=2 SV=1									39.35	1	1	3.2													1	2	1	1.33333
A0A0J9YUH6	DNA-directed RNA polymerases I and III subunit RPAC2 OS=Mus musculus GN=Polr1d PE=1 SV=1									39.32	1	1	21.2													1	2	1	1.33333
Q8K396	Meiotic nuclear division protein 1 homolog OS=Mus musculus GN=Mnd1 PE=1 SV=1	39.25	1	1	9.3																					2	1	1	1.33333
A0A087WQR4	Phosphoinositide 3-kinase regulatory subunit 4 (Fragment) OS=Mus musculus GN=Pik3r4 PE=1 SV=1																	39.18	1	1	9.1					1	1	2	1.33333
Q3U0V6	Protein Zfp277 OS=Mus musculus GN=Zfp277 PE=1 SV=1									39.18	1	1	4.8													1	2	1	1.33333
D3Z6R2	MCG1037931 OS=Mus musculus GN=Gm10088 PE=4 SV=1																	39.06	1	1	7.1					1	1	2	1.33333
F7B673	SLAIN motif-containing protein 1 (Fragment) OS=Mus musculus GN=Slain1 PE=1 SV=1	38.95	1	1	3.1																					2	1	1	1.33333
F7D4S5	SLAIN motif-containing protein 1 (Fragment) OS=Mus musculus GN=Slain1 PE=1 SV=1	38.95	1	1	4.1																					2	1	1	1.33333
Q68FF7	SLAIN motif-containing protein 1 OS=Mus musculus GN=Slain1 PE=2 SV=1	38.95	1	1	5.2																					2	1	1	1.33333
F6S4B9	Histone acetyltransferase (Fragment) OS=Mus musculus GN=Kat7 PE=1 SV=1	38.68	1	1	22																					2	1	1	1.33333
Q8BX57	PX domain-containing protein kinase-like protein OS=Mus musculus GN=Pxk PE=1 SV=2	38.6	1	1	5.3																					2	1	1	1.33333
Q8BFY7	Protein FAM64A OS=Mus musculus GN=Fam64a PE=1 SV=1																	38.58	1	1	10					1	1	2	1.33333
Q8R1F0	Leydig cell tumor 10 kDa protein homolog OS=Mus musculus GN=D8Ertd738e PE=3 SV=1									38.51	1	1	18.1													1	2	1	1.33333
Q4FJR7	Eif1a protein OS=Mus musculus GN=Eif1a PE=2 SV=1	54.95	1	1	11.1					162.32	3	3	26.4	113.56	3	3	26.4									2	1	1	1.33333
Q3UZR8	Eukaryotic translation initiation factor 2B, subunit 1 (Alpha) OS=Mus musculus GN=Eif2b1 PE=1 SV=1																	38.48	1	1	7.5					1	1	2	1.33333
O54949	Serine/threonine-protein kinase NLK OS=Mus musculus GN=Nlk PE=1 SV=2									38.48	1	1	3.2													1	2	1	1.33333
Q3U7R1	Extended synaptotagmin-1 OS=Mus musculus GN=Esyt1 PE=1 SV=2																	38.45	1	1	2.1					1	1	2	1.33333
A2AP58	Protein Sptbn5 (Fragment) OS=Mus musculus GN=Sptbn5 PE=4 SV=1	38.36	1	1	1.3																					2	1	1	1.33333
Q3ULM2	Aryl hydrocarbon receptor nuclear translocator OS=Mus musculus GN=Arnt PE=1 SV=1									38.33	1	1	3.4													1	2	1	1.33333
P97310	DNA replication licensing factor MCM2 OS=Mus musculus GN=Mcm2 PE=1 SV=3									38.26	1	1	1.3													1	2	1	1.33333
Q5ND52	rRNA methyltransferase 3, mitochondrial OS=Mus musculus GN=Rnmtl1 PE=2 SV=1									53.29	1	1	5	28.42	1	1	2.6	29.51	1	1	4.1					1	1	2	1.33333
F8VPR5	CREB-binding protein OS=Mus musculus GN=Crebbp PE=1 SV=1	38.08	1	1	0.7																					2	1	1	1.33333
A0A0G2JG63	Protein strawberry notch homolog 1 (Fragment) OS=Mus musculus GN=Sbno1 PE=1 SV=1																	37.98	1	1	7					1	1	2	1.33333
Q5SU94	FMS-like tyrosine kinase 4 OS=Mus musculus GN=Flt4 PE=1 SV=1																	37.98	1	1	1.2					1	1	2	1.33333
Q99JH1	Ribonuclease P protein subunit p25-like protein OS=Mus musculus GN=Rpp25l PE=1 SV=1	44.81	1	1	5.5													51.41	1	1	5.5	37.28	1	1	5.5	2	1	1	1.33333
Q8BLR2	Copine-4 OS=Mus musculus GN=Cpne4 PE=1 SV=1	37.84	1	1	2.9																					2	1	1	1.33333
Z4YKT6	Dehydrogenase/reductase SDR family member 7B OS=Mus musculus GN=Dhrs7b PE=1 SV=1									37.83	1	1	2.9													1	2	1	1.33333
A0A0G2JEF6	Leucine-rich repeat flightless-interacting protein 2 (Fragment) OS=Mus musculus GN=Lrrfip2 PE=1 SV=1	37.82	1	1	16																					2	1	1	1.33333
E9Q8D7	Rho-related GTP-binding protein RhoE OS=Mus musculus GN=Rnd3 PE=1 SV=1	46.94	1	1	6.4	40.91	1	1	6.4	91.27	1	1	6.4	64.34	1	1	6.4	64.05	1	1	6.4					1	1	2	1.33333
Q0GGX2	Zinc finger protein 541 OS=Mus musculus GN=Znf541 PE=1 SV=1									37.63	1	1	1.2													1	2	1	1.33333
Q8K2A4	MCG140700, isoform CRA_c OS=Mus musculus GN=Zfp87 PE=2 SV=1																	37.59	1	1	3.1					1	1	2	1.33333
Q1MXF8	Sodium channel beta2 subunit OS=Mus musculus GN=Scn2b PE=1 SV=1	37.54	1	1	3.7																					2	1	1	1.33333
Q544N9	Monocarboxylate transporter 1 OS=Mus musculus GN=Slc16a1 PE=1 SV=1																	37.52	1	1	3.2					1	1	2	1.33333
G3UYB1	Serine/threonine-protein kinase Chk1 OS=Mus musculus GN=Chek1 PE=1 SV=1									37.52	1	1	2.5													1	2	1	1.33333
D3YZ84	tRNA-splicing endonuclease subunit Sen34 (Fragment) OS=Mus musculus GN=Tsen34 PE=1 SV=1																	37.49	1	1	16.1					1	1	2	1.33333
A0A0A0MQK7	Nuclear nucleic acid-binding protein C1D (Fragment) OS=Mus musculus GN=C1d PE=1 SV=1	37.41	1	1	6.8																					2	1	1	1.33333
P00342	L-lactate dehydrogenase C chain OS=Mus musculus GN=Ldhc PE=1 SV=2	37.35	1	1	7.2																					2	1	1	1.33333
D3YZQ8	Protein Daw1 OS=Mus musculus GN=Daw1 PE=4 SV=1	37.33	1	1	3.9																					2	1	1	1.33333
J3KMK0	Protein Gm9923 OS=Mus musculus GN=Gm9923 PE=4 SV=1																	37.17	1	1	4.2					1	1	2	1.33333
M0QWL1	Protein Gm21936 OS=Mus musculus GN=Gm21936 PE=3 SV=1																	37.17	1	1	6.9					1	1	2	1.33333
Q8C0E2	Vacuolar protein sorting-associated protein 26B OS=Mus musculus GN=Vps26b PE=1 SV=1									37.17	1	1	3.3													1	2	1	1.33333
F6RBY3	Alpha-1,3/1,6-mannosyltransferase ALG2 (Fragment) OS=Mus musculus GN=Alg2 PE=1 SV=1																	37.16	1	1	14.7					1	1	2	1.33333
Q3UFJ3	Pyruvate dehydrogenase E1 component subunit alpha OS=Mus musculus GN=Pdha1 PE=1 SV=1									37.15	1	1	7.2													1	2	1	1.33333
Q3UVL4	Vacuolar protein sorting-associated protein 51 homolog OS=Mus musculus GN=Vps51 PE=1 SV=2									37.15	1	1	1.8													1	2	1	1.33333
Q8R4U6	DNA topoisomerase I, mitochondrial OS=Mus musculus GN=Top1mt PE=2 SV=1	36.96	1	1	4.7																					2	1	1	1.33333
H7BWY7	E3 ubiquitin-protein ligase ARIH1 OS=Mus musculus GN=Arih1 PE=1 SV=1																	36.88	1	1	3.7					1	1	2	1.33333
E9QPU2	Dynein heavy chain 12, axonemal (Fragment) OS=Mus musculus GN=Dnah12 PE=1 SV=1	36.79	1	1	3.5																					2	1	1	1.33333
O35126	Atrophin-1 OS=Mus musculus GN=Atn1 PE=1 SV=1									36.71	1	1	1.9													1	2	1	1.33333
Q9Z0R9	Fatty acid desaturase 2 OS=Mus musculus GN=Fads2 PE=1 SV=1									104.88	3	4	14	43.77	1	2	7.7	70.72	2	3	11.3	45.98	1	2	9	1	1.66667	1.33333	1.33333
Q5SXR2	Vacuole membrane protein 1 (Fragment) OS=Mus musculus GN=Vmp1 PE=1 SV=1									36.59	1	1	10													1	2	1	1.33333
G3XA09	Apoptotic protease-activating factor 1 OS=Mus musculus GN=Apaf1 PE=1 SV=1	36.54	1	1	2.3																					2	1	1	1.33333
Q5FW94	DNA primase OS=Mus musculus GN=Prim1 PE=1 SV=1									45.67	1	3	9.8	36.14	1	3	9.6	46.68	1	1	5.5					1	1	2	1.33333
B1ARL2	Olfactory receptor (Fragment) OS=Mus musculus GN=Olfr59 PE=3 SV=1	36.5	1	1	3																					2	1	1	1.33333
Q7TRX0	Olfactory receptor OS=Mus musculus GN=Olfr406 PE=2 SV=1	36.5	1	1	2.2																					2	1	1	1.33333
Q03142	Fibroblast growth factor receptor 4 OS=Mus musculus GN=Fgfr4 PE=1 SV=3	55.61	1	1	2	51.62	1	1	2									60.49	1	1	3.3					1	1	2	1.33333
Q3UYY2	Cell cycle checkpoint protein RAD17 OS=Mus musculus GN=Rad17 PE=1 SV=1																	36.23	1	1	1.6					1	1	2	1.33333
A2ALA4	Mediator of RNA polymerase II transcription subunit 22 (Fragment) OS=Mus musculus GN=Med22 PE=1 SV=1									36.12	1	1	5.4													1	2	1	1.33333
Q3UPI1	Protein FAM198B OS=Mus musculus GN=Fam198b PE=2 SV=1									36.09	1	1	2.9													1	2	1	1.33333
P70302	Stromal interaction molecule 1 OS=Mus musculus GN=Stim1 PE=1 SV=2	36.07	1	1	3.6																					2	1	1	1.33333
Q8K2T8	RNA polymerase II-associated factor 1 homolog OS=Mus musculus GN=Paf1 PE=1 SV=1									36.03	1	1	2.1													1	2	1	1.33333
Q99PT1	Rho GDP-dissociation inhibitor 1 OS=Mus musculus GN=Arhgdia PE=1 SV=3									35.97	1	1	11.3													1	2	1	1.33333
F2Z414	Fanconi anemia group I protein homolog OS=Mus musculus GN=Fanci PE=1 SV=1																	35.92	1	1	2.3					1	1	2	1.33333
Q4FJZ6	Gclm protein OS=Mus musculus GN=Gclm PE=1 SV=1																	35.92	1	1	10.9					1	1	2	1.33333
Q0PHV7	Dapper homolog 3 OS=Mus musculus GN=Dact3 PE=1 SV=1									35.91	1	1	1.6													1	2	1	1.33333
Q5SV77	Gametogenetin-binding protein 2 OS=Mus musculus GN=Ggnbp2 PE=1 SV=1									35.91	1	1	5.5													1	2	1	1.33333
O88783	Coagulation factor V OS=Mus musculus GN=F5 PE=1 SV=1									35.88	1	1	1.3													1	2	1	1.33333
Q99LC9	Peroxisome assembly factor 2 OS=Mus musculus GN=Pex6 PE=1 SV=1									35.83	1	1	0.7													1	2	1	1.33333
G3X932	DNA segment, Chr 15, Wayne State University 169, expressed, isoform CRA_a OS=Mus musculus GN=Arhgap39 PE=1 SV=1	35.8	1	1	1.5																					2	1	1	1.33333
F6YVH6	Chromosome transmission fidelity protein 18 homolog (Fragment) OS=Mus musculus GN=Chtf18 PE=1 SV=1																	35.79	1	1	25.7					1	1	2	1.33333
F6TQQ9	Cysteine-rich PDZ-binding protein (Fragment) OS=Mus musculus GN=Cript PE=1 SV=1									35.73	1	1	7.3													1	2	1	1.33333
E0CXE7	CST complex subunit CTC1 OS=Mus musculus GN=Ctc1 PE=1 SV=1									35.68	1	1	1.8													1	2	1	1.33333
E9Q9B3	Protein Spryd3 OS=Mus musculus GN=Spryd3 PE=1 SV=1	39.75	1	2	6.1	52.13	1	2	4.1	104.28	2	5	12	28.88	1	2	6.6	119.52	2	3	6.6	67.85	2	3	9.7	1	2	1	1.33333
B0R029	Synaptosomal-associated protein 23 (Fragment) OS=Mus musculus GN=Snap23 PE=1 SV=6																	35.53	1	1	32.9					1	1	2	1.33333
Q9D2R0	Acetoacetyl-CoA synthetase OS=Mus musculus GN=Aacs PE=1 SV=1																	35.53	1	1	4.8					1	1	2	1.33333
E0CYP3	Protein phosphatase 1H OS=Mus musculus GN=Ppm1h PE=1 SV=1	35.4	1	1	5.3																					2	1	1	1.33333
Q8BG79	CWF19-like protein 2 OS=Mus musculus GN=Cwf19l2 PE=1 SV=1	35.38	1	1	5.3																					2	1	1	1.33333
B2RT41	Protein Zfc3h1 OS=Mus musculus GN=Zfc3h1 PE=1 SV=1	35.2	1	1	1.1																					2	1	1	1.33333
Q9R061	Cytosolic Fe-S cluster assembly factor NUBP2 OS=Mus musculus GN=Nubp2 PE=1 SV=1									47.07	1	1	6.5					42.74	1	1	6.5	35.88	1	1	6.5	1	2	1	1.33333
Q6A028	Switch-associated protein 70 OS=Mus musculus GN=Swap70 PE=1 SV=2																	35.07	1	1	1.2					1	1	2	1.33333
Q497N6	CEP295 N-terminal-like protein OS=Mus musculus GN=Cep295nl PE=1 SV=1	34.94	1	1	2.6																					2	1	1	1.33333
D3Z390	Bicaudal D homolog 2 (Drosophila), isoform CRA_a OS=Mus musculus GN=Bicd2 PE=1 SV=2	34.9	1	1	3.5																					2	1	1	1.33333
Q99JA0	Calcitonin gene-related peptide 1 OS=Mus musculus GN=Calca PE=2 SV=1	34.79	1	1	5.5																					2	1	1	1.33333
B9EJX8	Peptidyl-prolyl cis-trans isomerase OS=Mus musculus GN=Ppil1 PE=1 SV=1																	34.74	1	1	6.6					1	1	2	1.33333
B1AWN4	Phospholipid-transporting ATPase OS=Mus musculus GN=Atp10b PE=3 SV=1	34.72	1	1	2.3																					2	1	1	1.33333
Q571B6	WASP homolog-associated protein with actin, membranes and microtubules OS=Mus musculus GN=Whamm PE=1 SV=2									34.72	1	1	3.2													1	2	1	1.33333
Q9JLB0	MAGUK p55 subfamily member 6 OS=Mus musculus GN=Mpp6 PE=1 SV=1									34.6	1	1	3.4													1	2	1	1.33333
Q9Z266	SNARE-associated protein Snapin OS=Mus musculus GN=Snapin PE=1 SV=1									34.43	1	1	8.8													1	2	1	1.33333
F7DD14	Mast/stem cell growth factor receptor Kit OS=Mus musculus GN=Kit PE=1 SV=2									38.48	1	1	1.6					37.98	1	1	2.5	27.77	1	1	1.6	1	2	1	1.33333
A0A075B5X9	Ig heavy chain V region B1-8/186-2 (Fragment) OS=Mus musculus GN=Ighv1-72 PE=4 SV=1																	34.28	1	1	13.7					1	1	2	1.33333
A2AJG0	Ribonuclease P protein subunit p38 OS=Mus musculus GN=Rpp38 PE=1 SV=1									34.14	1	1	4.3													1	2	1	1.33333
Q9CQQ8	U6 snRNA-associated Sm-like protein LSm7 OS=Mus musculus GN=Lsm7 PE=1 SV=1									33.99	1	1	7.8													1	2	1	1.33333
Q5SVF7	4-nitrophenylphosphatase domain and non-neuronal SNAP25-like protein homolog 1 (C. elegans), isoform CRA_f OS=Mus musculus GN=Nipsnap1 PE=1 SV=1									48.07	1	1	3.2	34.14	1	1	5.3	37.33	1	1	5.3					1	1	2	1.33333
E9PXL5	Folate receptor alpha (Fragment) OS=Mus musculus GN=Folr1 PE=1 SV=1									33.91	1	1	5													1	2	1	1.33333
A2AQH4	BCL-6 corepressor-like protein 1 OS=Mus musculus GN=Bcorl1 PE=2 SV=1																	33.72	1	1	0.9					1	1	2	1.33333
Q8CGN4	BCL-6 corepressor OS=Mus musculus GN=Bcor PE=1 SV=2																	33.72	1	1	1.1					1	1	2	1.33333
Q9EP53	Hamartin OS=Mus musculus GN=Tsc1 PE=1 SV=1																	33.66	1	1	1.6					1	1	2	1.33333
Q9Z315	U4/U6.U5 tri-snRNP-associated protein 1 OS=Mus musculus GN=Sart1 PE=1 SV=1																	33.62	1	1	5.1					1	1	2	1.33333
Q499E6	Uncharacterized protein C1orf109 homolog OS=Mus musculus PE=2 SV=1									33.58	1	1	6.9													1	2	1	1.33333
B1AXD8	Akirin-2 OS=Mus musculus GN=Akirin2 PE=1 SV=1																	33.47	1	1	9					1	1	2	1.33333
Q9Z2I9	Succinyl-CoA ligase [ADP-forming] subunit beta, mitochondrial OS=Mus musculus GN=Sucla2 PE=1 SV=2																	33.28	1	1	1.9					1	1	2	1.33333
J9JI28	Protein Vwa3b OS=Mus musculus GN=Vwa3b PE=4 SV=1									33.23	1	1	2.2													1	2	1	1.33333
Q3UHH4	Tripartite motif-containing protein 2 OS=Mus musculus GN=Trim2 PE=1 SV=1																	33.18	1	1	2.5					1	1	2	1.33333
H3BLI7	Ras-like protein family member 10B OS=Mus musculus GN=Rasl10b PE=4 SV=1									33.17	1	1	4.8													1	2	1	1.33333
A2AFW6	Mitochondrial carrier homolog 2 OS=Mus musculus GN=Mtch2 PE=1 SV=1									33.09	1	1	10.9													1	2	1	1.33333
D3YX79	Proteasome subunit alpha type OS=Mus musculus GN=Gm8394 PE=3 SV=1									33.09	1	1	6.6													1	2	1	1.33333
P09240	Cholecystokinin OS=Mus musculus GN=Cck PE=1 SV=3																	33.03	1	1	6.1					1	1	2	1.33333
A2AN37	Uridine kinase OS=Mus musculus GN=Uck1 PE=1 SV=1									32.99	1	1	3.5													1	2	1	1.33333
Q3UQL2	COP9 signalosome complex subunit 3 OS=Mus musculus GN=Cops3 PE=1 SV=1									66.81	1	1	5.2	52.91	1	1	5.2	44.95	1	1	5.2					1	1	2	1.33333
Q9ESW4	Acylglycerol kinase, mitochondrial OS=Mus musculus GN=Agk PE=1 SV=1									32.87	1	1	3.1													1	2	1	1.33333
Q9JLV1	BAG family molecular chaperone regulator 3 OS=Mus musculus GN=Bag3 PE=1 SV=2									32.73	1	1	2.3													1	2	1	1.33333
A2AIS9	Arrestin domain-containing protein 1 (Fragment) OS=Mus musculus GN=Arrdc1 PE=1 SV=1																	32.7	1	1	7.6					1	1	2	1.33333
Q3UFM5	Nucleolar MIF4G domain-containing protein 1 OS=Mus musculus GN=Nom1 PE=1 SV=2									32.63	1	1	2.5													1	2	1	1.33333
Q6PFQ7	Ras GTPase-activating protein 4 OS=Mus musculus GN=Rasa4 PE=1 SV=1									32.63	1	1	2.6													1	2	1	1.33333
D3Z4J2	Katanin p60 ATPase-containing subunit A-like 2 OS=Mus musculus GN=Katnal2 PE=3 SV=1									32.62	1	1	4.2													1	2	1	1.33333
Q3TP92	CTD nuclear envelope phosphatase 1 OS=Mus musculus GN=Ctdnep1 PE=1 SV=2									32.61	1	1	4.5													1	2	1	1.33333
Q0VE82	Copine-7 OS=Mus musculus GN=Cpne7 PE=1 SV=1									32.57	1	1	5													1	2	1	1.33333
Q9QYI3	DnaJ homolog subfamily C member 7 OS=Mus musculus GN=Dnajc7 PE=1 SV=2																	32.52	1	1	2.6					1	1	2	1.33333
Q8VC85	U6 snRNA-associated Sm-like protein LSm1 OS=Mus musculus GN=Lsm1 PE=1 SV=1									32.42	1	1	12													1	2	1	1.33333
Q540E6	GTP-binding protein Rheb OS=Mus musculus GN=Rheb PE=1 SV=1									32.3	1	1	8.7													1	2	1	1.33333
Q9R1T2	SUMO-activating enzyme subunit 1 OS=Mus musculus GN=Sae1 PE=1 SV=1									32.21	1	1	6.6													1	2	1	1.33333
Q3U1V3	Beta-adrenergic receptor kinase 1 OS=Mus musculus GN=Adrbk1 PE=1 SV=1																	32.12	1	1	2.8					1	1	2	1.33333
B0QZV7	Ras association domain-containing protein 1 OS=Mus musculus GN=Rassf1 PE=1 SV=1									31.99	1	1	4.4													1	2	1	1.33333
F7ADT6	GTPase-activating protein and VPS9 domain-containing protein 1 (Fragment) OS=Mus musculus GN=Gapvd1 PE=1 SV=1									31.92	1	1	4.4													1	2	1	1.33333
Q8K3F6	Potassium voltage-gated channel subfamily KQT member 3 OS=Mus musculus GN=Kcnq3 PE=1 SV=2																	31.88	1	1	2.2					1	1	2	1.33333
F6TB42	Partitioning defective 3 homolog (Fragment) OS=Mus musculus GN=Pard3 PE=1 SV=1									31.88	1	1	23.3													1	2	1	1.33333
Q8VHL5	Gamma-crystallin N OS=Mus musculus GN=Crygn PE=1 SV=2									31.85	1	1	3.8													1	2	1	1.33333
G3UX35	Transcription activator BRG1 (Fragment) OS=Mus musculus GN=Smarca4 PE=1 SV=1																	31.79	1	1	0.6					1	1	2	1.33333
A2AQG6	Protein Spdye4c (Fragment) OS=Mus musculus GN=Spdye4c PE=4 SV=1																	31.75	1	1	6.1					1	1	2	1.33333
P51807	Dynein light chain Tctex-type 1 OS=Mus musculus GN=Dynlt1 PE=1 SV=1									131.5	2	3	30.1	44.98	1	1	15.9	36.46	1	1	15.9	47.44	1	1	15.9	1	2	1	1.33333
Q921X9	Protein disulfide-isomerase A5 OS=Mus musculus GN=Pdia5 PE=1 SV=1									31.74	1	1	8.5													1	2	1	1.33333
Q91YP3	Deoxyribose-phosphate aldolase OS=Mus musculus GN=Dera PE=1 SV=1																	31.73	1	1	6.6					1	1	2	1.33333
Q9CX97	WD repeat-containing protein 55 OS=Mus musculus GN=Wdr55 PE=1 SV=2									31.69	1	1	3.6													1	2	1	1.33333
Q99M96	Suppressor of tumorigenicity 7 protein OS=Mus musculus GN=St7 PE=2 SV=1									31.66	1	1	2.4													1	2	1	1.33333
A0A075B5N1	Ig kappa chain V-I region S107A OS=Mus musculus GN=Igkv7-33 PE=1 SV=5									31.61	1	1	13.3													1	2	1	1.33333
A0A0A6YWS6	Digestive organ expansion factor homolog OS=Mus musculus GN=Diexf PE=1 SV=1																	31.57	1	1	1.7					1	1	2	1.33333
Q3U6K9	Phosphoserine aminotransferase OS=Mus musculus GN=Psat1 PE=1 SV=1									31.55	1	1	5.4													1	2	1	1.33333
Q9CZ30	Obg-like ATPase 1 OS=Mus musculus GN=Ola1 PE=1 SV=1									108.58	2	2	6.1	52.49	1	2	6.1	84.91	2	3	8.1	57.63	1	1	6.1	1	1	2	1.33333
A0A0A6YWD5	Protein Pcdh7 (Fragment) OS=Mus musculus GN=Pcdh7 PE=1 SV=1									31.51	1	1	10.4													1	2	1	1.33333
Q8K2D2	Osbpl1a protein OS=Mus musculus GN=Osbpl1a PE=1 SV=1									31.47	1	1	5													1	2	1	1.33333
Q8K0U4	Heat shock 70 kDa protein 12A OS=Mus musculus GN=Hspa12a PE=1 SV=1									31.46	1	1	3.9													1	2	1	1.33333
Q9CZJ2	Heat shock 70 kDa protein 12B OS=Mus musculus GN=Hspa12b PE=1 SV=1									31.46	1	1	2.9													1	2	1	1.33333
Q9CQ25	Mitotic-spindle organizing protein 2 OS=Mus musculus GN=Mzt2 PE=1 SV=1	359.12	4	4	37.7	135.2	2	2	22	297.98	4	4	39	362.72	5	5	39	339.39	5	5	39	159.11	3	3	37.7	1.66667	0.833333	1.5	1.33333
E9Q6T9	BTB/POZ domain-containing protein KCTD1 OS=Mus musculus GN=Kctd1 PE=1 SV=1																	31.33	1	1	0.8					1	1	2	1.33333
A3KG93	Lysine-specific histone demethylase 1A OS=Mus musculus GN=Kdm1a PE=1 SV=1									31.3	1	1	1.4													1	2	1	1.33333
P62311	U6 snRNA-associated Sm-like protein LSm3 OS=Mus musculus GN=Lsm3 PE=1 SV=2																	31.26	1	1	11.8					1	1	2	1.33333
Q14AI7	COP9 (Constitutive photomorphogenic) homolog, subunit 4 (Arabidopsis thaliana) OS=Mus musculus GN=Cops4 PE=1 SV=1																	31.15	1	1	5.4					1	1	2	1.33333
P27790	Major centromere autoantigen B OS=Mus musculus GN=Cenpb PE=2 SV=2																	31.04	1	1	4.7					1	1	2	1.33333
Q6DD96	Protein Pcdhga7 OS=Mus musculus GN=Pcdhga7 PE=2 SV=1									30.88	1	1	2.1													1	2	1	1.33333
Q91XX3	MCG133388, isoform CRA_y OS=Mus musculus GN=Pcdhgb7 PE=1 SV=1									30.88	1	1	2.5													1	2	1	1.33333
Q91XX5	Protein Pcdhgb5 OS=Mus musculus GN=Pcdhgb5 PE=2 SV=1									30.88	1	1	2.2													1	2	1	1.33333
Q9DBU3	Serine/threonine-protein kinase RIO3 OS=Mus musculus GN=Riok3 PE=1 SV=3																	30.86	1	1	1.7					1	1	2	1.33333
D3YVF8	Zinc finger and BTB domain-containing protein 7A (Fragment) OS=Mus musculus GN=Zbtb7a PE=1 SV=1									30.78	1	1	15.5													1	2	1	1.33333
Q543Q7	Ephrin B3 OS=Mus musculus GN=Efnb3 PE=1 SV=1																	30.77	1	1	2.1					1	1	2	1.33333
Q544L9	Ephrin B1, isoform CRA_a OS=Mus musculus GN=Efnb1 PE=1 SV=1																	30.77	1	1	2					1	1	2	1.33333
Q9ES34	Ubiquitin-protein ligase E3B OS=Mus musculus GN=Ube3b PE=1 SV=3																	30.6	1	1	1					1	1	2	1.33333
A2ATU9	Histone acetyltransferase type B catalytic subunit OS=Mus musculus GN=Hat1 PE=1 SV=1									30.42	1	1	2.4													1	2	1	1.33333
P45952	Medium-chain specific acyl-CoA dehydrogenase, mitochondrial OS=Mus musculus GN=Acadm PE=1 SV=1									30.34	1	1	2.9													1	2	1	1.33333
Q9WUJ8	Origin recognition complex subunit 6 OS=Mus musculus GN=Orc6 PE=1 SV=1									57.02	1	1	11.1	56.54	1	1	6.5	55.44	1	1	3.8					1	1	2	1.33333
G3UYF8	Homeobox protein unc-4 homolog OS=Mus musculus GN=Uncx PE=4 SV=2									30.31	1	1	2.8													1	2	1	1.33333
O35690	Paired mesoderm homeobox protein 2B OS=Mus musculus GN=Phox2b PE=1 SV=1									30.31	1	1	6.7													1	2	1	1.33333
Q6ZQ11	Chondroitin sulfate synthase 1 OS=Mus musculus GN=Chsy1 PE=2 SV=2									30.08	1	1	3.1													1	2	1	1.33333
Q9D720	Non-structural maintenance of chromosomes element 1 homolog OS=Mus musculus GN=Nsmce1 PE=1 SV=1																	29.89	1	1	3.8					1	1	2	1.33333
A0A075B5N2	Protein Igkv6-29 OS=Mus musculus GN=Igkv6-29 PE=4 SV=5									29.88	1	1	14													1	2	1	1.33333
Q9JMI0	Endothelin-converting enzyme-like 1 OS=Mus musculus GN=Ecel1 PE=2 SV=2									29.88	1	1	2.3													1	2	1	1.33333
D3Z481	Hyccin OS=Mus musculus GN=Fam126a PE=1 SV=1																	29.87	1	1	6					1	1	2	1.33333
Q61292	Laminin subunit beta-2 OS=Mus musculus GN=Lamb2 PE=1 SV=2																	29.85	1	1	0.4					1	1	2	1.33333
E9Q1X8	Voltage-dependent calcium channel subunit alpha-2/delta-1 OS=Mus musculus GN=Cacna2d1 PE=1 SV=2																	29.82	1	1	1.2					1	1	2	1.33333
F6WEP7	Ribosome biogenesis protein BRX1 homolog (Fragment) OS=Mus musculus GN=Brix1 PE=1 SV=1									29.62	1	1	4.8													1	2	1	1.33333
Q9DB96	Neuroguidin OS=Mus musculus GN=Ngdn PE=1 SV=1									29.53	1	1	7													1	2	1	1.33333
A0A0A6YX55	DDB1- and CUL4-associated factor 8 (Fragment) OS=Mus musculus GN=Dcaf8 PE=1 SV=1																	29.43	1	1	20.3					1	1	2	1.33333
Q8N7N5	DDB1- and CUL4-associated factor 8 OS=Mus musculus GN=Dcaf8 PE=1 SV=1																	29.43	1	1	6.1					1	1	2	1.33333
Q60519	Semaphorin-5B OS=Mus musculus GN=Sema5b PE=2 SV=2									29.41	1	1	0.6													1	2	1	1.33333
Q9CR89	Endoplasmic reticulum-Golgi intermediate compartment protein 2 OS=Mus musculus GN=Ergic2 PE=1 SV=1									29.4	1	1	3.4													1	2	1	1.33333
F6TE23	Podocalyxin-like protein 2 (Fragment) OS=Mus musculus GN=Podxl2 PE=1 SV=1									29.27	1	1	3.6													1	2	1	1.33333
Q80TB8	Synaptic vesicle membrane protein VAT-1 homolog-like OS=Mus musculus GN=Vat1l PE=1 SV=2									29.22	1	1	3.6													1	2	1	1.33333
Q8R310	Transmembrane and coiled-coil domains protein 3 OS=Mus musculus GN=Tmcc3 PE=1 SV=2									29.18	1	1	2.7													1	2	1	1.33333
Q3V1H1	Cytoskeleton-associated protein 2 OS=Mus musculus GN=Ckap2 PE=1 SV=1																	29.14	1	1	3.8					1	1	2	1.33333
D3YXT0	NADH dehydrogenase [ubiquinone] iron-sulfur protein 2, mitochondrial OS=Mus musculus GN=Ndufs2 PE=1 SV=1																	29.1	1	1	3.9					1	1	2	1.33333
Q8CG64	Fukutin-related protein OS=Mus musculus GN=Fkrp PE=1 SV=1																	29.09	1	1	3.2					1	1	2	1.33333
Q5HZH2	Ribosome biogenesis protein TSR3 homolog OS=Mus musculus GN=Tsr3 PE=1 SV=1									29.04	1	1	5.9													1	2	1	1.33333
D3YVR7	L-lactate dehydrogenase (Fragment) OS=Mus musculus GN=Ldhc PE=1 SV=1									29.01	1	1	6.4													1	2	1	1.33333
Q6P1H7	Forkhead box M1 OS=Mus musculus GN=Foxm1 PE=1 SV=1									28.93	1	1	4.1													1	2	1	1.33333
D3Z468	PWWP domain-containing protein MUM1 (Fragment) OS=Mus musculus GN=Mum1 PE=1 SV=1																	28.88	1	1	4.1					1	1	2	1.33333
Q7TSY8	Shugoshin-like 2 OS=Mus musculus GN=Sgol2 PE=1 SV=1									28.86	1	1	1.5													1	2	1	1.33333
O35929	GTP-binding protein REM 1 OS=Mus musculus GN=Rem1 PE=1 SV=1									28.83	1	1	9.1													1	2	1	1.33333
Q3TH76	GTP binding protein (Gene overexpressed in skeletal muscle), isoform CRA_b OS=Mus musculus GN=Gem PE=2 SV=1									28.83	1	1	5.4													1	2	1	1.33333
Q91VR8	Protein BRICK1 OS=Mus musculus GN=Brk1 PE=1 SV=1									28.78	1	1	9.3													1	2	1	1.33333
Q8C253	Galectin OS=Mus musculus GN=Lgals3 PE=1 SV=1									28.77	1	1	9.5													1	2	1	1.33333
P48760	Folylpolyglutamate synthase, mitochondrial OS=Mus musculus GN=Fpgs PE=1 SV=3									28.71	1	1	5.8													1	2	1	1.33333
A0A0G2JEI9	Protein Rsbn1l OS=Mus musculus GN=Rsbn1l PE=1 SV=1																	28.7	1	1	2.9					1	1	2	1.33333
Q9D6X6	Serine protease 23 OS=Mus musculus GN=Prss23 PE=2 SV=2									28.67	1	1	3.1													1	2	1	1.33333
A8Y5Q6	Mediator of RNA polymerase II transcription subunit 18 (Fragment) OS=Mus musculus GN=Med18 PE=1 SV=1									28.53	1	1	8.2													1	2	1	1.33333
Q0VBD0	Integrin beta OS=Mus musculus GN=Itgb8 PE=1 SV=1									28.48	1	1	1													1	2	1	1.33333
P40142	Transketolase OS=Mus musculus GN=Tkt PE=1 SV=1																	28.41	1	1	6.1					1	1	2	1.33333
Z4YLD0	Protein C330007P06Rik OS=Mus musculus GN=C330007P06Rik PE=1 SV=1									28.37	1	1	6.2													1	2	1	1.33333
Q7TRE6	Olfactory receptor OS=Mus musculus GN=Olfr874 PE=3 SV=1																	28.31	1	1	2.6					1	1	2	1.33333
F6V5H4	Sushi, nidogen and EGF-like domain-containing protein 1 (Fragment) OS=Mus musculus GN=Sned1 PE=1 SV=1									28.3	1	1	3													1	2	1	1.33333
E9Q341	Serine/threonine-protein kinase 36 (Fragment) OS=Mus musculus GN=Stk36 PE=1 SV=1																	28.26	1	1	1.5					1	1	2	1.33333
Q3UJQ9	Succinyl-CoA:3-ketoacid-coenzyme A transferase OS=Mus musculus GN=Oxct1 PE=1 SV=1																	28.25	1	1	1.4					1	1	2	1.33333
Q8BTV1	Tumor suppressor candidate 3 OS=Mus musculus GN=Tusc3 PE=1 SV=1																	28.23	1	1	2.9					1	1	2	1.33333
Q8CF66	Ragulator complex protein LAMTOR4 OS=Mus musculus GN=Lamtor4 PE=1 SV=2									28.18	1	1	10.1													1	2	1	1.33333
Q9DCJ7	Aurora kinase A-interacting protein OS=Mus musculus GN=Aurkaip1 PE=2 SV=2									28.17	1	1	5													1	2	1	1.33333
E9PZI6	Katanin p60 ATPase-containing subunit A1 OS=Mus musculus GN=Katna1 PE=1 SV=1									28.15	1	1	2													1	2	1	1.33333
E9Q0A3	Protein Arhgef11 (Fragment) OS=Mus musculus GN=Arhgef11 PE=1 SV=6																	28.12	1	1	2.5					1	1	2	1.33333
A2A9Q2	Nardilysin OS=Mus musculus GN=Nrd1 PE=1 SV=1																	28.08	1	1	1.1					1	1	2	1.33333
Q8CG73	Protein fantom OS=Mus musculus GN=Rpgrip1l PE=1 SV=2																	28.05	1	1	2.6					1	1	2	1.33333
A0A0G2JFJ6	Integrator complex subunit 3 OS=Mus musculus GN=Ints3 PE=1 SV=1																	27.98	1	1	1.3					1	1	2	1.33333
Q1LZI2	Putative thiamine transporter SLC35F3 OS=Mus musculus GN=Slc35f3 PE=2 SV=1									27.95	1	1	1.7													1	2	1	1.33333
G3X9X1	MCG13111, isoform CRA_a OS=Mus musculus GN=Kbtbd2 PE=1 SV=1																	27.92	1	1	1.6					1	1	2	1.33333
Q3V009	Transmembrane emp24 domain-containing protein 1 OS=Mus musculus GN=Tmed1 PE=1 SV=1																	27.92	1	1	4					1	1	2	1.33333
H3BJG4	Protein Trip11 (Fragment) OS=Mus musculus GN=Trip11 PE=1 SV=1																	27.88	1	1	2.1					1	1	2	1.33333
A2RSX9	Arfip1 protein OS=Mus musculus GN=Arfip1 PE=1 SV=1																	27.86	1	1	2.1					1	1	2	1.33333
P0C7T6	Ataxin-1-like OS=Mus musculus GN=Atxn1l PE=1 SV=1																	27.83	1	1	3.8					1	1	2	1.33333
Q78PY7	Staphylococcal nuclease domain-containing protein 1 OS=Mus musculus GN=Snd1 PE=1 SV=1	1938.7	29	47	43.1	1349.2	22	31	41.9	1194.7	23	32	42.1	637.12	14	21	28.5	1041.81	21	25	34.4	945.95	20	25	34.3	1.5	1.5	1	1.33333
F6VIB5	Histone deacetylase 7 (Fragment) OS=Mus musculus GN=Hdac7 PE=1 SV=1									27.76	1	1	5.4													1	2	1	1.33333
A8Y5J3	Integrator complex subunit 11 OS=Mus musculus GN=Cpsf3l PE=1 SV=1									27.7	1	1	3.8													1	2	1	1.33333
D3YW29	Protein 2610020H08Rik OS=Mus musculus GN=2610020H08Rik PE=1 SV=1									27.69	1	1	2													1	2	1	1.33333
Q3UWW6	GAS2-like protein 3 OS=Mus musculus GN=Gas2l3 PE=2 SV=1																	27.68	1	1	1.5					1	1	2	1.33333
O08710	Thyroglobulin OS=Mus musculus GN=Tg PE=1 SV=3									27.68	1	1	0.7													1	2	1	1.33333
P59235	Nucleoporin Nup43 OS=Mus musculus GN=Nup43 PE=1 SV=2									27.68	1	1	3.7													1	2	1	1.33333
Q62179	Semaphorin-4B OS=Mus musculus GN=Sema4b PE=1 SV=2									27.67	1	1	1.8													1	2	1	1.33333
Q8BZI0	Actin filament-associated protein 1-like 1 OS=Mus musculus GN=Afap1l1 PE=1 SV=1																	27.62	1	1	1.7					1	1	2	1.33333
A0A0A6YWX1	Ubiquitin carboxyl-terminal hydrolase 19 OS=Mus musculus GN=Usp19 PE=1 SV=1									27.62	1	1	2.3													1	2	1	1.33333
F6QYF8	Puromycin-sensitive aminopeptidase (Fragment) OS=Mus musculus GN=Npepps PE=1 SV=1																	27.6	1	1	1.9					1	1	2	1.33333
Q8C0E3	Tripartite motif-containing protein 47 OS=Mus musculus GN=Trim47 PE=1 SV=2																	27.5	1	1	1.1					1	1	2	1.33333
Q545W2	DNA-directed RNA polymerases I and III subunit RPAC2 OS=Mus musculus GN=Polr1d PE=1 SV=1									27.5	1	1	8.3													1	2	1	1.33333
E0CY86	Beta-galactosidase OS=Mus musculus GN=Glb1l2 PE=1 SV=1																	27.49	1	1	1.2					1	1	2	1.33333
Q69ZX6	MORC family CW-type zinc finger protein 2A OS=Mus musculus GN=Morc2a PE=1 SV=2																	27.49	1	1	3.3					1	1	2	1.33333
Q6RT24	Centromere-associated protein E OS=Mus musculus GN=Cenpe PE=1 SV=1																	27.49	1	1	1.8					1	1	2	1.33333
E0CY69	Transcription factor 19-like protein (Fragment) OS=Mus musculus GN=Tcf19 PE=4 SV=6									27.45	1	1	6.5													1	2	1	1.33333
J3QP71	Basigin (Fragment) OS=Mus musculus GN=Bsg PE=1 SV=1									27.43	1	1	5.1													1	2	1	1.33333
Q8JZZ6	AMMECR1-like protein OS=Mus musculus GN=Ammecr1l PE=1 SV=1									27.42	1	1	3.2													1	2	1	1.33333
G5E8L8	Mitogen activated protein kinase kinase kinase 2 OS=Mus musculus GN=Map3k2 PE=1 SV=1									27.41	1	1	2.4													1	2	1	1.33333
D3YZJ1	Sequestosome-1 OS=Mus musculus GN=Sqstm1 PE=1 SV=1																	27.39	1	1	2.9					1	1	2	1.33333
Q5F2D9	Arrestin, beta 2 OS=Mus musculus GN=Arrb2 PE=1 SV=1									27.37	1	1	4.9													1	2	1	1.33333
A3KMD2	RAN binding protein 6 OS=Mus musculus GN=Ranbp6 PE=1 SV=1																	27.35	1	1	3.1					1	1	2	1.33333
E9Q2Y5	Zinc finger and BTB domain-containing protein 49 OS=Mus musculus GN=Zbtb49 PE=4 SV=1									27.21	1	1	1.5													1	2	1	1.33333
F6ZRX7	Titin (Fragment) OS=Mus musculus GN=Ttn PE=1 SV=1									27.18	1	1	21.3													1	2	1	1.33333
Q9CYG7	Mitochondrial import receptor subunit TOM34 OS=Mus musculus GN=Tomm34 PE=1 SV=1									27.17	1	1	7.1													1	2	1	1.33333
E0CXV8	Polyhomeotic-like protein 1 OS=Mus musculus GN=Phc1 PE=1 SV=1																	27.15	1	1	0.7					1	1	2	1.33333
O35405	Phospholipase D3 OS=Mus musculus GN=Pld3 PE=1 SV=1																	27.12	1	1	2					1	1	2	1.33333
Q8BG40	Katanin p80 WD40 repeat-containing subunit B1 OS=Mus musculus GN=Katnb1 PE=1 SV=1																	27.11	1	1	4.7					1	1	2	1.33333
D3Z6T2	Acrosin-binding protein OS=Mus musculus GN=Acrbp PE=1 SV=1									27.07	1	1	4.3													1	2	1	1.33333
Q8C761	WD repeat-containing protein 60 OS=Mus musculus GN=Wdr60 PE=1 SV=1									27.04	1	1	1.7													1	2	1	1.33333
P41233	ATP-binding cassette sub-family A member 1 OS=Mus musculus GN=Abca1 PE=1 SV=4									26.94	1	1	0.8													1	2	1	1.33333
Q8BH74	Nuclear pore complex protein Nup107 OS=Mus musculus GN=Nup107 PE=1 SV=1									26.94	1	1	2.1													1	2	1	1.33333
Q3UF75	Alpha-parvin OS=Mus musculus GN=Parva PE=1 SV=1									26.86	1	1	4.8													1	2	1	1.33333
F6WMX7	Calcium uptake protein 3, mitochondrial (Fragment) OS=Mus musculus GN=Micu3 PE=1 SV=1									26.83	1	1	6.9													1	2	1	1.33333
Q8BXZ1	Protein disulfide-isomerase TMX3 OS=Mus musculus GN=Tmx3 PE=1 SV=2									26.64	1	1	1.8													1	2	1	1.33333
Q8CIT0	Corticoliberin OS=Mus musculus GN=Crh PE=2 SV=1									26.63	1	1	3.7													1	2	1	1.33333
B2RPU7	Krueppel-like factor 16 OS=Mus musculus GN=Klf16 PE=1 SV=1									87.08	2	3	19.1	43.39	1	1	6.8									1	2	1	1.33333
Q91YZ5	Peroxisomal membrane protein 3 OS=Mus musculus GN=Pex2 PE=1 SV=1									26.49	1	1	3.6													1	2	1	1.33333
U3KLT0	Bromodomain-containing protein 2 OS=Mus musculus GN=Brd2 PE=1 SV=1									26.42	1	1	2.5													1	2	1	1.33333
Q8BVF4	Coiled-coil domain-containing protein 30 OS=Mus musculus GN=Ccdc30 PE=1 SV=1									26.41	1	1	2.6													1	2	1	1.33333
Q3U2K0	Protein FAM193B OS=Mus musculus GN=Fam193b PE=1 SV=2									26.4	1	1	1.2													1	2	1	1.33333
Q3V1H3	Hephaestin-like protein 1 OS=Mus musculus GN=Hephl1 PE=2 SV=2									26.28	1	1	0.6													1	2	1	1.33333
Q8CB77	Transcription elongation factor B polypeptide 3 OS=Mus musculus GN=Tceb3 PE=1 SV=3	103.76	2	4	7.4	53.68	1	2	2.6	80.84	2	3	7.1	59.62	1	3	8.4	74.24	2	3	5.4	55.54	1	2	3.6	1.66667	1	1.33333	1.33333
E9PYU8	E3 ubiquitin-protein ligase SMURF1 OS=Mus musculus GN=Smurf1 PE=1 SV=1	57.05	1	1	1.3	58.88	1	1	3.2	64.92	1	1	2.2					61.25	1	1	1.3	57.9	1	1	1.3	1	2	1	1.33333
Q02105	Complement C1q subcomponent subunit C OS=Mus musculus GN=C1qc PE=1 SV=2									47.18	1	1	4.1	36.91	1	1	4.1	27.12	1	1	4.1					1	1	2	1.33333
Q80YQ1	Thrombospondin 1 OS=Mus musculus GN=Thbs1 PE=1 SV=1	419.08	7	14	12	252.61	4	8	7.9	444.05	9	11	9.9	239.12	5	8	9.1	326.39	6	9	9.2	366.94	7	9	9.6	1.66667	1.33333	1	1.33333
L7N2A4	Protein Vmn2r92 OS=Mus musculus GN=Vmn2r92 PE=4 SV=1									30.02	1	1	0.8	29.73	1	1	0.8	33.19	1	1	0.8					1	1	2	1.33333
Q8BJ90	Zinc finger protein 771 OS=Mus musculus GN=Znf771 PE=2 SV=1									71.15	2	3	7.6	35.67	1	1	4.1									1	2	1	1.33333
Q3TE80	Protein 2410002F23Rik OS=Mus musculus GN=2410002F23Rik PE=1 SV=1					47.51	1	3	10.2	88.29	2	2	10.2					57	1	2	6.3	43.78	1	3	10.9	0.25	3	0.75	1.33333
Q91YI6	Poly(A) RNA polymerase GLD2 OS=Mus musculus GN=Papd4 PE=1 SV=1									109.74	2	2	10.5	54.7	1	1	6.8	53.24	1	2	7.9	49.83	1	1	6.4	1	1.5	1.5	1.33333
G3X925	Pyruvate kinase OS=Mus musculus GN=Pklr PE=1 SV=1	46.84	1	1	6.6	52.7	1	1	7									46.5	1	1	5.7					1	1	2	1.33333
Q8BHI4	Kelch repeat and BTB domain-containing protein 3 OS=Mus musculus GN=Kbtbd3 PE=2 SV=1									33.67	1	1	1.2	35.94	1	1	1.2	34.78	1	1	1.2					1	1	2	1.33333
Q3UJK4	GTP-binding protein 2 OS=Mus musculus GN=Gtpbp2 PE=1 SV=1									90.24	2	3	6	39.92	1	1	3.8	113.21	2	2	3.8	101.6	2	2	3.8	1	2	1	1.33333
A0A075B5N6	Protein Igkv8-16 OS=Mus musculus GN=Igkv8-16 PE=4 SV=5									34.97	1	1	5.8	34.76	1	1	5.8	29.78	1	1	5.8					1	1	2	1.33333
Q9Z0X1	Apoptosis-inducing factor 1, mitochondrial OS=Mus musculus GN=Aifm1 PE=1 SV=1									580.47	12	15	32.5	294.27	5	8	20.4	233.09	5	10	25.7	324.55	7	8	21.1	1	1.77778	1.22222	1.33333
O88520	Leucine-rich repeat protein SHOC-2 OS=Mus musculus GN=Shoc2 PE=1 SV=2									45.73	1	1	4.1	79.72	1	1	3.4	75.27	1	1	2.2					1	1	2	1.33333
Q61029	Lamina-associated polypeptide 2, isoforms beta/delta/epsilon/gamma OS=Mus musculus GN=Tmpo PE=1 SV=4	1864.1	25	31	58.2	1467.07	18	29	53.1	1212.51	17	20	56.2	825	12	14	42.9	994.77	15	22	56.4	980.12	14	14	42	1.06667	1.4	1.53333	1.33333
B2RQY6	BC035947 protein OS=Mus musculus GN=BC035947 PE=2 SV=1									29.97	1	1	2					27.11	1	1	1.2	34.02	1	1	1.2	1	2	1	1.33333
F6ZMT3	Target of EGR1 protein 1 (Fragment) OS=Mus musculus GN=Toe1 PE=1 SV=1									122.79	3	5	25.5	88.41	2	2	14.9									1	2	1	1.33333
Q8R3C0	Mini-chromosome maintenance complex-binding protein OS=Mus musculus GN=Mcmbp PE=1 SV=1									64.68	2	3	6.5	39.72	1	2	3.4	81.77	2	4	8.1	68.98	2	2	3.4	1	1.33333	1.66667	1.33333
B2RXX9	Myosin, heavy polypeptide 7, cardiac muscle, beta OS=Mus musculus GN=Myh7 PE=1 SV=1	59.92	1	3	3.4	60.19	1	2	4.4	62.76	1	1	1.4	81.89	2	2	2.1	56.75	1	1	1.7					1.33333	0.666667	2	1.33333
P02662	Alpha-S1-casein (Laboratory-Cont) OS=Bos taurus GN=CSN1S1 PE=1 SV=2	43.18	1	2	10.3	124.04	2	2	12.6									157.35	3	3	17.3	37.01	1	1	7	1	1	2	1.33333
Q1RLL3	Copine-9 OS=Mus musculus GN=Cpne9 PE=1 SV=1	37.84	1	2	4.5	49.99	1	2	4.7									27.24	1	1	1.6					1	1	2	1.33333
Q0PD38	RAB18, member RAS oncogene family, isoform CRA_a OS=Mus musculus GN=Rab18 PE=1 SV=1									90.29	2	2	10.7	100.79	2	2	10.7	31.06	1	1	5.3					1	1	2	1.33333
Q80ZS3	28S ribosomal protein S26, mitochondrial OS=Mus musculus GN=Mrps26 PE=1 SV=1					42.04	1	1	14.5	220.12	4	5	28.5	162.6	3	3	13.5	67.07	2	3	19.5	45.86	1	1	13.5	0.5	1.5	2	1.33333
D6REF6	Ankyrin repeat domain-containing protein 54 OS=Mus musculus GN=Ankrd54 PE=1 SV=1	72.62	1	1	13.9	87.92	1	1	8.8									29.73	1	1	8.8					1	1	2	1.33333
A0A087WSC6	TAR DNA-binding protein 43 (Fragment) OS=Mus musculus GN=Tardbp PE=1 SV=1	53.02	1	2	19.2	77.81	2	2	19.2	37.27	1	1	19.2													1	2	1	1.33333
E9Q264	Protein Myh15 OS=Mus musculus GN=Myh15 PE=1 SV=1	59.92	1	2	3.4	60.19	1	1	3.4	62.76	1	1	2	54.48	1	1	1.2	56.75	1	2	3.6	45.37	1	1	2	1.5	1	1.5	1.33333
D3Z684	Gem-associated protein 7 (Fragment) OS=Mus musculus GN=Gemin7 PE=1 SV=1	49.54	1	1	18.5	77.04	1	1	18.5	109.52	2	3	45.7	36.59	1	1	18.5	28.85	1	2	18.5	55.42	2	2	45.7	1	2	1	1.33333
Q3UEB3	Poly(U)-binding-splicing factor PUF60 OS=Mus musculus GN=Puf60 PE=1 SV=2	112.38	2	7	16.5	170.43	3	7	16.7	140.88	3	5	16	68.85	1	3	10.6	71.46	1	2	6.7	76.98	1	1	3.9	1	1.5	1.5	1.33333
Q91VH2	Sorting nexin-9 OS=Mus musculus GN=Snx9 PE=1 SV=1	189.55	4	7	13.9	248.46	5	6	12.8	137.16	3	9	15	128.23	4	6	15.5	179.47	5	9	21.2	120.79	4	6	15.3	1.14286	1.42857	1.42857	1.33333
Q5SX39	Myosin-4 OS=Mus musculus GN=Myh4 PE=2 SV=1	59.92	1	4	2.8	60.19	1	2	2.3					54.48	1	2	2.5	56.75	1	1	1.4					1.66667	0.333333	2	1.33333
Q8CH77	Neuron navigator 1 OS=Mus musculus GN=Nav1 PE=1 SV=2																	30.82	1	3	2.5	30.71	1	1	1.4	1	1	2	1.33333
Q4FJL3	Pbx2 protein OS=Mus musculus GN=Pbx2 PE=1 SV=1	92.63	2	3	13	92.52	1	1	9.1																	2	1	1	1.33333
Q3UE92	X-prolyl aminopeptidase (Aminopeptidase P) 1, soluble, isoform CRA_b OS=Mus musculus GN=Xpnpep1 PE=1 SV=1	61.75	1	3	2.9	61.68	1	1	1.5																	2	1	1	1.33333
A2APM1	CD44 antigen OS=Mus musculus GN=Cd44 PE=1 SV=1	75.01	1	2	3.2	81.26	1	2	3.7	57.59	1	2	2.1	92.92	1	1	2	126.17	2	2	2.1	85.84	1	1	2	1	1.5	1.5	1.33333
P62315	Small nuclear ribonucleoprotein Sm D1 OS=Mus musculus GN=Snrpd1 PE=1 SV=1	46.12	1	3	44.5	56.46	1	1	14.3	63.22	1	1	10.9	46.22	1	1	10.9	53.02	1	1	9.2	61.33	1	1	10.9	2	1	1	1.33333
Q9CQ71	Replication protein A 14 kDa subunit OS=Mus musculus GN=Rpa3 PE=1 SV=1	244.62	5	9	68.6	220.45	4	4	45.5	38.52	1	2	14	28.41	1	1	14					48.49	1	1	14	2	1.5	0.5	1.33333
Q8BK64	Activator of 90 kDa heat shock protein ATPase homolog 1 OS=Mus musculus GN=Ahsa1 PE=1 SV=2									90.05	1	1	6.5	75.69	1	1	6.5	27.89	1	3	9.5	50.44	1	1	6.5	1	1	2	1.33333
Q5ND37	Pigment epithelium-derived factor (Fragment) OS=Mus musculus GN=Serpinf1 PE=1 SV=1									36.19	1	1	6.8	76.48	1	1	6.8	33.99	1	1	6.8					1	1	2	1.33333
Q8BWZ3	N-alpha-acetyltransferase 25, NatB auxiliary subunit OS=Mus musculus GN=Naa25 PE=1 SV=1													37.32	1	1	1.3	65.67	2	4	6.2	35.34	1	1	2.2	1	0.5	2.5	1.33333
Q3U3Q3	U3 small nucleolar RNA-associated protein 18 homolog OS=Mus musculus GN=Utp18 PE=1 SV=1									27.29	1	3	6.3	36.46	1	1	2.4									1	2	1	1.33333
B2RRP1	Gene trap ROSA b-geo 22 OS=Mus musculus GN=Tpgs1 PE=1 SV=1					43.46	1	2	7.3	52.16	1	2	13.9					28.46	1	1	2.6	64.18	2	2	7.3	0.333333	3	0.666667	1.33333
P62071	Ras-related protein R-Ras2 OS=Mus musculus GN=Rras2 PE=1 SV=1									156.89	4	6	28.9	99.15	2	2	11.3	106.02	2	3	17.6	252.55	5	5	25	1	2.33333	0.666667	1.33333
P33215	Protein NEDD1 OS=Mus musculus GN=Nedd1 PE=1 SV=2	1052.68	15	25	39.4	972.75	14	16	29.8	1111.08	19	21	42	711.72	13	14	27.3	725.87	13	15	29.1	638.78	11	15	28	1.52941	1.46667	1	1.33203
E9Q5G3	Kinesin-like protein KIF23 OS=Mus musculus GN=Kif23 PE=1 SV=1	653.04	13	19	24.8	158.61	3	11	17.6	650.46	13	13	23.3	307.35	7	10	18.3	923.54	17	20	31.1	848.45	17	19	29.6	1.66667	1.27273	1.05	1.3298
G3X922	MCG115602 OS=Mus musculus GN=Dnajc13 PE=1 SV=1	1421.28	23	36	18.5	1371.46	23	36	18.7	146.86	3	13	7.6	179.04	4	8	4.5	584.04	13	19	10.4	354.08	8	13	7.4	1	1.55556	1.42857	1.32804
P58854	Gamma-tubulin complex component 3 OS=Mus musculus GN=Tubgcp3 PE=1 SV=2	1866.88	27	41	48.7	1484.14	22	34	39.9	1702.36	29	38	44.1	944.86	17	21	30.3	1148.04	22	26	35.5	956.47	18	26	35.1	1.2	1.77273	1	1.32424
Q9JJY4	Probable ATP-dependent RNA helicase DDX20 OS=Mus musculus GN=Ddx20 PE=1 SV=2	203.94	3	5	8.6	72.11	1	3	5.3	382.85	6	12	20.2	169.82	3	7	11.8	313.45	7	10	16.7	429.08	7	12	18.8	1.5	1.625	0.846154	1.32372
Q9QYJ0	DnaJ homolog subfamily A member 2 OS=Mus musculus GN=Dnaja2 PE=1 SV=1	112.8	2	5	14.1	108.3	2	5	17.7	605.53	12	14	32	288.3	5	8	29.6	415	10	12	28.4	338.67	7	9	28.9	1	1.66667	1.3	1.32222
A2BG75	Nuclear factor 1 OS=Mus musculus GN=Nfib PE=1 SV=1	211.02	4	6	16.6	220.57	4	5	16.4	619.52	12	15	36.8	283.44	6	9	25.9	306.59	6	11	27.7	301.5	7	9	22.7	1.16667	1.6	1.2	1.32222
Q921F4	Heterogeneous nuclear ribonucleoprotein L-like OS=Mus musculus GN=Hnrnpll PE=1 SV=3	222.18	4	10	17.3	331.06	6	11	23.4	378.25	8	11	23.7	165.75	4	6	14	298.52	6	7	16.1	134.45	3	5	11.3	0.916667	1.71429	1.33333	1.32143
A2APZ7	Paired mesoderm homeobox protein 2 OS=Mus musculus GN=Prrx2 PE=2 SV=1	140.43	2	4	17	288.68	4	6	25.9					138.92	3	3	10.1	110.31	2	2	10.1					0.714286	0.25	3	1.32143
Q8C2Q3	RNA-binding protein 14 OS=Mus musculus GN=Rbm14 PE=1 SV=1	797.81	14	16	26.8	717.72	12	13	23	779.47	16	17	27.2	291.75	7	9	16.1	503.45	9	14	24.8	575.62	12	15	26.2	1.21429	1.8	0.9375	1.31726
E9PZ21	RNA-binding motif, single-stranded-interacting protein 1 OS=Mus musculus GN=Rbms1 PE=1 SV=1	181.12	3	5	18.7	135.98	2	4	13.4	232.28	4	6	19.4	42.43	1	3	11.8	125.44	3	3	11.8	72.64	2	3	11.8	1.2	1.75	1	1.31667
Q8CBY1	Protein Smaug homolog 1 OS=Mus musculus GN=Samd4a PE=1 SV=2					78.64	2	4	6.3	326.02	7	10	17.9	163.07	3	3	5.6	135.04	3	6	9.7	134.32	3	6	12.1	0.2	2.75	1	1.31667
Q9WUM5	Succinyl-CoA ligase [ADP/GDP-forming] subunit alpha, mitochondrial OS=Mus musculus GN=Suclg1 PE=1 SV=4									302.29	4	5	17.1	237.61	4	4	13.9	216.48	4	6	19.7	202.12	3	3	13.9	1	1.2	1.75	1.31667
P70168	Importin subunit beta-1 OS=Mus musculus GN=Kpnb1 PE=1 SV=2	214.25	3	6	10.4	235.49	3	3	4.9	194.51	3	6	9.1	252.92	5	6	10.2	237.63	4	5	8.6	129.38	3	4	5.9	1.75	1	1.2	1.31667
Q921G8	Gamma-tubulin complex component 2 OS=Mus musculus GN=Tubgcp2 PE=1 SV=2	2246.98	35	52	57.3	1497.6	25	39	44.1	1991.9	36	47	63.1	973.97	17	28	42.1	1380.67	26	31	41.7	1331.99	25	32	46.9	1.325	1.65517	0.969697	1.31662
B2M1R6	Heterogeneous nuclear ribonucleoprotein K OS=Mus musculus GN=Hnrnpk PE=1 SV=1	1495.91	22	29	56.1	1323.09	21	23	54.5	1667.86	27	37	59.8	1257.16	20	23	53	1281.29	21	28	61.4	1412.18	21	25	53.2	1.25	1.58333	1.11538	1.31624
B2RSC8	E3 ubiquitin-protein ligase NEDD4 OS=Mus musculus GN=Nedd4 PE=1 SV=1	1288.29	19	28	37.8	903.14	15	19	28	1124.87	25	31	34.2	840.84	15	21	27.4	1133.43	23	26	32.9	988.65	20	25	30.2	1.45	1.45455	1.03846	1.31434
Q545X8	40S ribosomal protein S4 OS=Mus musculus GN=Rps4x PE=1 SV=1	1528.97	23	28	59.3	1078.98	17	20	52.9	1967.34	34	40	73	1613.91	28	29	65.4	1856.68	32	37	77.2	1565.17	26	31	73.8	1.38095	1.36667	1.1875	1.31171
Q9QXX4	Calcium-binding mitochondrial carrier protein Aralar2 OS=Mus musculus GN=Slc25a13 PE=1 SV=1	88.98	2	2	5.5	108.26	2	4	10.1	30.54	1	2	4.1									29.49	1	2	4.6	0.6	3	0.333333	1.31111
O08583	THO complex subunit 4 OS=Mus musculus GN=Alyref PE=1 SV=3	255.32	4	8	26.3	282.14	5	7	26.3	367.89	6	8	36.5	199.31	4	4	21.6	169.05	3	4	26.7	169.67	2	4	34.5	1.125	1.8	1	1.30833
O88952	Protein lin-7 homolog C OS=Mus musculus GN=Lin7c PE=1 SV=2	225.01	5	8	43.1	256.61	5	7	46.2	243.34	5	6	42.6	86.01	2	4	20.8	200.75	4	6	39.1	212.82	4	4	32.5	1.125	1.4	1.4	1.30833
A0A067XG53	Peripheral plasma membrane protein CASK (Fragment) OS=Mus musculus GN=Cask PE=1 SV=1					233.9	5	10	13.9	39.11	1	2	3.6					129.22	3	4	6.8	136.84	3	5	7	0.0909091	3	0.833333	1.30808
Q99KP6	Pre-mRNA-processing factor 19 OS=Mus musculus GN=Prpf19 PE=1 SV=1	230.95	4	7	22.8	97.69	2	9	22.8	197.61	4	8	30.2	116.19	3	6	25.4	332.25	7	10	29	202.62	4	5	17.7	0.8	1.28571	1.83333	1.30635
Q99LI5	Zinc finger protein 281 OS=Mus musculus GN=Znf281 PE=1 SV=1									155.36	3	4	9.3	39.67	1	3	4.5	82.74	2	4	5.7	30.03	1	2	4.4	1	1.25	1.66667	1.30556
Q9DCG9	Multifunctional methyltransferase subunit TRM112-like protein OS=Mus musculus GN=Trmt112 PE=1 SV=1	69.38	1	1	24.8					268.7	4	4	52	75.59	1	3	42.4	44.94	1	1	15.2	111.42	2	2	24.8	2	1.25	0.666667	1.30556
P14873	Microtubule-associated protein 1B OS=Mus musculus GN=Map1b PE=1 SV=2	325.8	6	10	5.7	256.88	5	11	6.7	213.19	4	5	3.1	100.21	2	4	2.2	121.93	2	8	4.9	108.39	2	4	2.5	0.916667	1.2	1.8	1.30556
A2AV19	Exosome complex component RRP4 (Fragment) OS=Mus musculus GN=Exosc2 PE=1 SV=1									215.62	4	4	22.7	145.24	3	3	18.6	159.08	3	4	22.7	115.64	2	2	12.6	1	1.25	1.66667	1.30556
Q8C5L3	CCR4-NOT transcription complex subunit 2 OS=Mus musculus GN=Cnot2 PE=1 SV=2	221.18	3	4	10.7	245.53	3	3	7.6	162.62	4	4	9.3	30.34	1	2	8.5	38.86	1	1	3	26.41	1	1	3	1.25	1.66667	1	1.30556
P63038	60 kDa heat shock protein, mitochondrial OS=Mus musculus GN=Hspd1 PE=1 SV=1									78.72	2	6	14.1	71.41	2	3	6.3	239.68	5	6	15.4	212.4	4	5	18.3	1	1.75	1.16667	1.30556
G3UYV7	40S ribosomal protein S28 (Fragment) OS=Mus musculus GN=Rps28 PE=1 SV=1	138.36	2	3	42.9	142.08	2	2	37.5	116.84	2	4	50	121.74	2	3	33.9	123.81	2	3	50	100.97	2	2	37.5	1.33333	1.25	1.33333	1.30556
Q91X76	5~-nucleotidase domain containing 2 OS=Mus musculus GN=Nt5dc2 PE=1 SV=1	795.48	13	14	30	495.44	8	10	27.9	459.8	9	12	33.1	228.18	6	7	20.5	372.22	8	11	25.6	487.63	10	12	28.7	1.36364	1.625	0.923077	1.3039
Q8R5C5	Beta-centractin OS=Mus musculus GN=Actr1b PE=1 SV=1									101.92	3	6	24.5	33.34	1	4	16.2	39.18	1	5	19.1	56.61	1	3	9.3	1	1.4	1.5	1.3
Q0P688	Eukaryotic translation initiation factor 4E member 2 OS=Mus musculus GN=Eif4e2 PE=1 SV=1	284.32	5	11	41.7	142.65	2	6	30.8	408.19	5	8	34.6	244.34	5	6	33.8	197.23	4	8	35	274.19	5	9	43.3	1.71429	1.28571	0.9	1.3
Q99MR6	Serrate RNA effector molecule homolog OS=Mus musculus GN=Srrt PE=1 SV=1	190.22	3	5	10.1	77.59	1	3	5.1	62.38	2	6	9.6	109.44	3	4	4.5	278.11	6	6	9.5	213.76	5	6	9.7	1.5	1.4	1	1.3
Q922Q8	Leucine-rich repeat-containing protein 59 OS=Mus musculus GN=Lrrc59 PE=1 SV=1	850.6	11	13	50.5	493.21	7	9	30	1229.41	19	22	50.5	866.83	14	17	53.1	950.61	14	16	53.4	794.3	12	13	53.1	1.4	1.27778	1.21429	1.29735
G3UZI2	Heterogeneous nuclear ribonucleoprotein Q OS=Mus musculus GN=Syncrip PE=1 SV=1	978.87	15	27	51	753.17	12	25	44.6	1196.76	22	25	44.2	624.65	12	15	30.9	756.9	13	18	38	696.11	13	15	36.2	1.07692	1.625	1.1875	1.29647
Q3TJD7	PDZ and LIM domain protein 7 OS=Mus musculus GN=Pdlim7 PE=1 SV=1	557.64	10	14	39.2	214.03	3	7	26.3	261.97	6	11	31.9	640.18	11	14	38.7	707.83	13	16	43.3	601.25	11	13	37.6	1.875	0.8	1.21429	1.29643
Q3U9G9	Lamin-B receptor OS=Mus musculus GN=Lbr PE=1 SV=2	456.56	8	11	18.4	354.5	5	9	15.5	1082.82	19	22	31.9	738.92	12	15	22.7	586.81	10	14	30	574.14	10	11	20.9	1.2	1.4375	1.25	1.29583
Q62095	ATP-dependent RNA helicase DDX3Y OS=Mus musculus GN=Ddx3y PE=1 SV=2	1964.47	30	43	48.6	1373.18	21	34	33.9	2196.36	39	47	51.4	1437.16	25	29	35.6	2129.3	34	40	51.2	1663.03	31	39	39.4	1.25714	1.6	1.025	1.29405
E9QB02	Methionine--tRNA ligase, cytoplasmic OS=Mus musculus GN=Mars PE=1 SV=1									306.19	7	11	17.1	96.51	2	5	6.6	222.05	4	6	7.5	228.04	5	7	10.9	1	2	0.875	1.29167
Q811U4	Mitofusin-1 OS=Mus musculus GN=Mfn1 PE=1 SV=3									135.5	3	4	7.4	48.75	1	2	3.8	132.43	4	5	8.2	35.35	1	4	6.3	1	1.66667	1.2	1.28889
Q58E35	60S acidic ribosomal protein P1 OS=Mus musculus GN=Rplp1 PE=1 SV=1	314.29	4	5	66.7	278.75	3	3	66.7	354.25	5	6	66.7	292.12	5	5	66.7	264.06	4	5	66.7	197.09	3	4	66.7	1.5	1.16667	1.2	1.28889
Q9D0D5	General transcription factor IIE subunit 1 OS=Mus musculus GN=Gtf2e1 PE=1 SV=1	48.93	1	3	9.8	157.41	3	4	10.7	211.19	3	6	14.5	155.8	3	4	15.9	100.4	2	4	13.6	94.23	2	2	6.4	0.8	1.4	1.66667	1.28889
G3X9Y9	Myosin Vb, isoform CRA_a OS=Mus musculus GN=Myo5b PE=1 SV=1	93.91	2	3	2.4	53.19	1	5	5.6					172.77	4	4	2.7	87.92	2	2	2.2					0.666667	0.2	3	1.28889
Q9CQM8	60S ribosomal protein L21 OS=Mus musculus GN=Rpl21 PE=1 SV=1	445.22	8	12	41.9	461.2	8	11	38.1	748.91	15	20	55.6	459.16	9	16	47.5	516.89	11	16	53.1	385.88	8	10	43.1	1.08333	1.23529	1.54545	1.28803
Q3TXT7	RuvB-like 2 OS=Mus musculus GN=Ruvbl2 PE=1 SV=1	925.97	16	20	38.2	828.93	13	18	41.5	1301.19	23	27	55.1	837.04	17	19	38	1282.84	23	26	45.8	859.05	16	19	40.4	1.10526	1.4	1.35	1.28509
D3Z3Q3	Smoothelin OS=Mus musculus GN=Smtn PE=1 SV=1	916.87	14	19	27.9	428.3	6	10	13.8	42.83	1	8	14	134.58	2	6	11.1	201.37	4	8	13.8	488.28	8	11	16.7	1.81818	1.28571	0.75	1.28463
Q60865	Caprin-1 OS=Mus musculus GN=Caprin1 PE=1 SV=2	1107.75	16	23	44.3	753.96	13	17	28.6	1430.4	25	27	45.5	877.87	15	19	28.3	1379.89	21	27	27.9	1212.92	18	24	32.2	1.33333	1.4	1.12	1.28444
Q9D0E1	Heterogeneous nuclear ribonucleoprotein M OS=Mus musculus GN=Hnrnpm PE=1 SV=3	1319.36	20	31	38.7	1036.92	15	24	35.8	1508	28	31	35.8	875.3	15	22	31.3	931.86	18	25	34	606.78	12	21	28.7	1.28	1.3913	1.18182	1.28437
Q3TE40	Replication protein A 32 kDa subunit OS=Mus musculus GN=Rpa2 PE=1 SV=1	382.39	7	10	33.3	366.81	7	9	34.8	66.96	2	2	8.1	121.1	3	3	19.6	31.43	1	1	5.2					1.1	0.75	2	1.28333
P63101	14-3-3 protein zeta/delta OS=Mus musculus GN=Ywhaz PE=1 SV=1	364.37	7	9	34.3	213.24	4	7	26.5	343.53	7	9	33.9	254.2	5	6	31.4	165.98	3	6	29	208.3	4	5	20	1.25	1.42857	1.16667	1.28175
O55222	Integrin-linked protein kinase OS=Mus musculus GN=Ilk PE=1 SV=2									302.49	7	13	33.8	178.91	5	8	18.6	235.78	6	8	17.3	174.26	5	6	13.3	1	1.55556	1.28571	1.28042
E9PZJ8	Activating signal cointegrator 1 complex subunit 3 OS=Mus musculus GN=Ascc3 PE=1 SV=1	771.67	14	26	15.5	667.28	12	22	11.8									30.51	1	4	3	42.04	1	2	1	1.17391	1	1.66667	1.28019
Q8C052	Microtubule-associated protein 1S OS=Mus musculus GN=Map1s PE=1 SV=2	151.44	3	5	7.3	265.39	5	8	10.4	376.04	9	10	11.6	155.52	4	6	7	262.83	5	7	8.2	166.35	4	4	4.2	0.666667	1.57143	1.6	1.27937
A2AJ72	MCG130458 OS=Mus musculus GN=Fubp3 PE=1 SV=1	338.43	6	9	20.2	413.59	8	10	23.7	449.48	8	11	24.1	196.81	4	7	18.3	355.37	6	9	20.7	228.37	4	6	17.2	0.909091	1.5	1.42857	1.27922
E9PVQ3	SPATS2-like protein OS=Mus musculus GN=Spats2l PE=1 SV=1	173.97	3	4	14.2	129.27	2	5	15.6									131.3	2	3	6.6	28.66	1	1	3.8	0.833333	1	2	1.27778
M1VHG1	Metastasis-associated protein MTA1 OS=Mus musculus GN=Mta1 PE=1 SV=1	59.81	1	4	7.4	54.84	1	5	10.8									42.35	1	1	4.9					0.833333	1	2	1.27778
Q9Z2D1	Myotubularin-related protein 2 OS=Mus musculus GN=Mtmr2 PE=1 SV=3	95.81	2	4	7	96.74	2	5	9.6	227.92	5	9	19.1	139.76	2	4	11.7									0.833333	2	1	1.27778
F8WGW3	S1 RNA-binding domain-containing protein 1 OS=Mus musculus GN=Srbd1 PE=1 SV=1	111.94	2	4	8.1	159.35	3	5	9.8	32.44	1	2	5.2	37.6	1	1	3.6	113.11	3	5	9.5	101.8	2	3	8.2	0.833333	1.5	1.5	1.27778
Q99MU3	Double-stranded RNA-specific adenosine deaminase OS=Mus musculus GN=Adar PE=1 SV=2	59.37	1	4	6.5	124.51	3	5	8.7									38.34	1	1	1.4					0.833333	1	2	1.27778
D3YYF6	Cellular nucleic acid-binding protein OS=Mus musculus GN=Cnbp PE=1 SV=1	66.82	1	2	10.8									69.62	1	1	10.8					94.35	2	2	21.6	3	0.5	0.333333	1.27778
O89079	Coatomer subunit epsilon OS=Mus musculus GN=Cope PE=1 SV=3									466.09	8	10	40.6	213.69	4	5	33.8									1	1.83333	1	1.27778
Q8VDR9	Dedicator of cytokinesis protein 6 OS=Mus musculus GN=Dock6 PE=1 SV=4	464.43	10	17	8.8	233.9	5	11	6.4	42.95	1	2	1.8	29.37	1	2	1.6	207.33	4	7	5.9	92.88	2	5	3.1	1.5	1	1.33333	1.27778
Q9CW46	Ribonucleoprotein PTB-binding 1 OS=Mus musculus GN=Raver1 PE=1 SV=2	133.75	3	6	13.4	52.56	1	3	8	670.33	11	12	31.8	342.71	7	11	23.7	658.59	10	12	32.1	427.48	8	12	30.3	1.75	1.08333	1	1.27778
Q8BHG9	CGG triplet repeat-binding protein 1 OS=Mus musculus GN=Cggbp1 PE=1 SV=1									137.29	3	3	16.8	33.38	1	2	11.4	32.67	1	2	17.4	63.62	1	1	10.8	1	1.33333	1.5	1.27778
Q8C147	Dedicator of cytokinesis protein 8 OS=Mus musculus GN=Dock8 PE=1 SV=4	188.16	2	7	3.7	131.32	2	5	3.6	56.79	1	2	3.6	68.53	1	1	1.2	132.22	2	4	2.3	114.91	3	4	2.7	1.33333	1.5	1	1.27778
P43275	Histone H1.1 OS=Mus musculus GN=Hist1h1a PE=1 SV=2	353.37	5	7	31	358.45	5	5	28.6	394.53	7	7	31.9	264.91	4	5	28.6	231.24	4	6	29.1	221.78	4	5	28.6	1.33333	1.33333	1.16667	1.27778
Q91ZE0	Trimethyllysine dioxygenase, mitochondrial OS=Mus musculus GN=Tmlhe PE=1 SV=2					46.72	1	1	5.5					32.05	1	2	5	42.24	1	2	5					0.5	0.333333	3	1.27778
Q8BL97	Serine/arginine-rich splicing factor 7 OS=Mus musculus GN=Srsf7 PE=1 SV=1	370.37	6	7	30.7	235.62	3	8	28.8	357.53	6	8	26.6	102.72	3	4	24.7	271.91	4	7	26.6	175.87	5	6	27.3	0.888889	1.8	1.14286	1.27725
G3XA17	Eukaryotic translation initiation factor 4 gamma 2 OS=Mus musculus GN=Eif4g2 PE=1 SV=1	1633.3	28	40	38.3	1239.3	21	32	37.1	777.27	15	20	26.3	407.55	8	13	15.9	937.5	18	25	28.5	827.24	17	23	27.8	1.24242	1.5	1.08333	1.27525
Q62261	Spectrin beta chain, non-erythrocytic 1 OS=Mus musculus GN=Sptbn1 PE=1 SV=2	2683.89	44	68	32.2	1054.3	17	38	20.6	707.41	16	21	11.6	1095.72	23	31	18.7	3701.39	70	85	42.1	2102.98	41	62	30.3	1.76923	0.6875	1.36508	1.27394
A2AWT5	Nucleolar transcription factor 1 OS=Mus musculus GN=Ubtf PE=1 SV=1	315.15	5	8	15.1	176.13	3	10	16.4	441.1	11	15	21.3	145.94	4	9	12.3	361.48	8	13	16.5	222.41	5	9	14.3	0.818182	1.6	1.4	1.27273
Q5SUS9	RNA-binding protein EWS OS=Mus musculus GN=Ewsr1 PE=1 SV=1	466.37	6	8	13	579.51	8	10	15.9	295.45	4	5	13.2	132.99	2	2	4.4	190.59	3	3	7.1	183.55	3	3	7.1	0.818182	2	1	1.27273
Q9ET54	Palladin OS=Mus musculus GN=Palld PE=1 SV=2	639.92	11	19	18.5	392.54	7	10	8.9	1497.3	27	30	25.9	1566.87	28	32	26.6	1984.11	33	35	29.5	1610.66	28	33	23.9	1.81818	0.939394	1.05882	1.27213
Q61584	Fragile X mental retardation syndrome-related protein 1 OS=Mus musculus GN=Fxr1 PE=1 SV=2	2197.08	31	41	49.5	1412.77	21	34	50.7	2147.28	36	41	56.6	1316.64	20	28	49.2	2048.77	32	41	55.8	1789.91	26	35	48	1.2	1.44828	1.16667	1.27165
G3UYG6	PERQ amino acid-rich with GYF domain-containing protein 2 OS=Mus musculus GN=Gigyf2 PE=1 SV=1	895.39	17	25	22.4	570.29	10	17	18.8	584.48	14	16	20.8	253.31	5	9	13.4	160.69	4	5	7.3	231.57	5	8	10.3	1.44444	1.7	0.666667	1.27037
Q8VHJ5	Serine/threonine-protein kinase MARK1 OS=Mus musculus GN=Mark1 PE=1 SV=2									241.64	6	7	10.3	120.82	3	6	7.5	359.59	9	9	11.4	113.69	3	5	6.5	1	1.14286	1.66667	1.26984
P11983	T-complex protein 1 subunit alpha OS=Mus musculus GN=Tcp1 PE=1 SV=3	196.09	4	8	16.9	113.09	2	6	12.6	940.64	17	24	43	649.51	13	18	40.1	1032.64	19	23	42.3	698.93	15	19	43.7	1.28571	1.31579	1.2	1.26717
Q5RKN9	Capping protein (Actin filament) muscle Z-line, alpha 1 OS=Mus musculus GN=Capza1 PE=1 SV=1	303	5	11	57.3	153.1	2	5	36	413.73	8	9	44.1	602.15	9	9	52.8	358.24	7	7	39.9	376.65	7	9	46.2	2	1	0.8	1.26667
Q99LF4	tRNA-splicing ligase RtcB homolog OS=Mus musculus GN=Rtcb PE=1 SV=1	1142.24	20	31	48.1	1236.22	20	24	43.4	1685.33	29	35	51.5	864.18	16	24	49.7	1067.75	22	28	51.9	1086.29	21	26	52.7	1.28	1.44	1.07407	1.26469
A2AWN8	YTH domain family 1, isoform CRA_a OS=Mus musculus GN=Ythdf1 PE=1 SV=1	302.87	6	8	18.4	165.18	3	7	16.9	372.97	8	9	20	226.26	5	5	8	265.15	5	6	15.5	183.6	4	6	15.5	1.125	1.66667	1	1.26389
Q8BTS0	DEAD (Asp-Glu-Ala-Asp) box polypeptide 5 OS=Mus musculus GN=Ddx5 PE=1 SV=1	1769.29	28	46	54.8	1588.88	27	37	44.2	1737.21	33	41	53.3	1201	23	27	49.6	1512.99	29	38	55.8	1417.98	27	36	57.6	1.23684	1.5	1.05405	1.26363
Q9QZD9	Eukaryotic translation initiation factor 3 subunit I OS=Mus musculus GN=Eif3i PE=1 SV=1	852.82	13	16	48.6	521.94	9	13	46.2	731.33	12	14	51.1	553.19	8	8	39.7	459.6	7	9	37.2	443.41	8	10	42.2	1.21429	1.66667	0.909091	1.26335
Q62093	Serine/arginine-rich splicing factor 2 OS=Mus musculus GN=Srsf2 PE=1 SV=4	663.06	9	9	25.3	483.27	6	6	21.7	530.02	9	9	21.7	400.03	8	8	21.7	341.91	6	9	25.3	384.76	6	7	22.2	1.42857	1.11111	1.25	1.26323
P12382	ATP-dependent 6-phosphofructokinase, liver type OS=Mus musculus GN=Pfkl PE=1 SV=4	92.11	2	10	15.9	101.11	2	6	14.6	399.35	7	14	21	414.64	9	15	23.5	911.01	16	22	32.1	744.47	13	17	26.9	1.57143	0.9375	1.27778	1.26224
Q9CWN7	CCR4-NOT transcription complex subunit 11 OS=Mus musculus GN=Cnot11 PE=1 SV=1	429.76	7	8	23	356.36	5	6	19.2	403.48	8	11	29.7	252.39	6	7	20.2	288.11	5	6	22.2	166.34	3	6	18.8	1.28571	1.5	1	1.2619
Q8BIW9	Chromosome transmission fidelity protein 18 homolog OS=Mus musculus GN=Chtf18 PE=1 SV=2	248.73	5	7	10.4	220.42	4	5	9.9	516.98	10	12	15.9	334.18	6	7	10.8	324.23	7	8	13.7	381.09	7	10	13.8	1.33333	1.625	0.818182	1.25884
Q62130	Tyrosine-protein phosphatase non-receptor type 14 OS=Mus musculus GN=Ptpn14 PE=1 SV=2	185.59	4	9	12.1	141.77	3	12	13.3	286.05	7	15	18.3	153.01	4	7	10.2	82.48	2	7	9.3	239.21	5	7	8.9	0.769231	2	1	1.25641
Q542J9	Proliferating cell nuclear antigen OS=Mus musculus GN=Pcna PE=1 SV=1	135.12	2	4	18	158.66	3	5	28.4	350.7	6	7	31	255.15	5	5	24.1	274.36	6	7	36.4	157.5	3	4	30.3	0.833333	1.33333	1.6	1.25556
Q8CG47	Structural maintenance of chromosomes protein 4 OS=Mus musculus GN=Smc4 PE=1 SV=1	753.77	15	25	24.6	407.66	8	18	19.1	979.14	19	23	21.9	542.51	12	17	15.6	691.92	15	16	15.9	416.73	10	15	13.4	1.36842	1.33333	1.0625	1.25475
Q6PDM2	Serine/arginine-rich splicing factor 1 OS=Mus musculus GN=Srsf1 PE=1 SV=3	505.39	9	13	47.2	366.17	6	10	39.9	454.14	10	13	43.5	276.97	6	9	39.5	320.52	6	11	43.5	398.8	8	10	39.9	1.27273	1.4	1.09091	1.25455
Q8VHK9	ATP-dependent RNA helicase DHX36 OS=Mus musculus GN=Dhx36 PE=1 SV=2	698.26	12	19	22.7	468.52	9	16	20	784.01	13	18	24.2	376.4	8	12	16.6	390.89	8	8	10.6	339.91	6	7	11	1.17647	1.46154	1.125	1.25434
Q9CYI4	Putative RNA-binding protein Luc7-like 1 OS=Mus musculus GN=Luc7l PE=1 SV=2	302.66	6	6	20.8	235.59	4	5	16.7	639.07	12	16	33.2	422.4	9	12	29.9	266.38	5	8	23.7	141.1	3	6	14.8	1.16667	1.30769	1.28571	1.25336
Q3U0I3	T-complex protein 1 subunit gamma OS=Mus musculus GN=Cct3 PE=1 SV=1	268.82	5	10	24.2	124.9	2	7	18.2	558.47	12	15	30.7	527.24	10	12	30.7	513.63	11	14	35.9	490	11	12	27.4	1.375	1.23077	1.15385	1.25321
Q52KC3	DNA helicase OS=Mus musculus GN=Mcm5 PE=1 SV=1	545.76	10	19	32.2	487.3	9	16	29.8	1279.99	24	32	46.3	1022.55	18	21	33.8	1095.8	22	28	41.1	1006.75	20	26	41.4	1.17647	1.5	1.07407	1.25018
Q8R0J7	Vacuolar protein sorting-associated protein 37B OS=Mus musculus GN=Vps37b PE=1 SV=1	116.71	2	2	15.4	62.16	1	1	6.3	182.62	4	4	24.6	34.55	1	3	22.1	186.33	4	4	24.6	93.75	3	4	24.6	1.5	1.25	1	1.25
P41778	Pre-B-cell leukemia transcription factor 1 OS=Mus musculus GN=Pbx1 PE=1 SV=2	261.08	4	6	22.8	92.52	1	3	12.1																	1.75	1	1	1.25
Q3TUH1	Phosphatidate cytidylyltransferase, mitochondrial OS=Mus musculus GN=Tamm41 PE=1 SV=2	69.91	1	3	12.8	48	1	3	21.1	408.13	8	9	26.7	147.49	3	4	23.4	104.19	2	2	7.7	93.91	2	3	18.4	1	2	0.75	1.25
Q61687	Transcriptional regulator ATRX OS=Mus musculus GN=Atrx PE=1 SV=3	144.45	3	6	4.1	56.22	1	3	2																	1.75	1	1	1.25
Q3TLR3	E3 ubiquitin-protein ligase TRIM32 OS=Mus musculus GN=Trim32 PE=1 SV=1									145.33	2	6	14.5	64.27	1	3	9.3	64.21	1	4	11.8	41.88	1	4	10.5	1	1.75	1	1.25
Q4FK14	Translocating chain-associated membrane protein OS=Mus musculus GN=Tram1 PE=1 SV=1	67.05	1	2	7.2	67.95	1	1	5.6	138.07	2	4	13.9	58.36	1	3	11									1.5	1.25	1	1.25
Q99KK1	Receptor expression-enhancing protein 3 OS=Mus musculus GN=Reep3 PE=1 SV=1									34.75	1	1	6.7					27.54	1	2	6.7	28.04	1	3	9.4	1	2	0.75	1.25
Q8BYK6	YTH domain-containing family protein 3 OS=Mus musculus GN=Ythdf3 PE=1 SV=2	468.06	7	11	19.7	349.33	5	7	15.7	366.93	6	8	19.1	275.82	5	7	13.8	292.73	5	8	17.3	216.94	5	7	13.7	1.5	1.125	1.125	1.25
Q5EG47	5~-AMP-activated protein kinase catalytic subunit alpha-1 OS=Mus musculus GN=Prkaa1 PE=1 SV=2	55.53	1	1	2.3	42.34	1	1	2.3	88.41	2	4	10	76.79	2	3	4.8	112.67	3	5	11.6	63.61	2	3	8.8	1	1.25	1.5	1.25
Q3UPA1	Guanine nucleotide binding protein, alpha 11 OS=Mus musculus GN=Gna11 PE=1 SV=1									147.16	2	4	13.4	164.09	3	3	12.3	201.02	4	5	14.8	117.91	3	3	10	1	1.25	1.5	1.25
A0A0A6YW80	N-alpha-acetyltransferase 15, NatA auxiliary subunit OS=Mus musculus GN=Naa15 PE=1 SV=1													125.68	3	3	4	195.66	5	9	13.4	34.03	1	3	5.2	1	0.25	2.5	1.25
Q497N1	40S ribosomal protein S26 OS=Mus musculus GN=Rps26 PE=1 SV=1	277.37	4	4	31.3	285.77	4	4	31.3	259.01	4	6	42.6	143.05	2	3	32.2	180.75	3	3	31.3	190.97	3	3	31.3	1	1.75	1	1.25
Q8BTW3	Exosome complex component MTR3 OS=Mus musculus GN=Exosc6 PE=1 SV=1	74.88	1	4	25.6	188.65	3	3	18.7	343.59	6	8	36.6	182.24	4	5	25.3	114.36	2	3	23.8	120.25	2	3	18.3	1.25	1.5	1	1.25
Q6ZQ29	Serine/threonine-protein kinase TAO2 OS=Mus musculus GN=Taok2 PE=1 SV=3									28.82	1	4	4.7	63.93	2	3	3.7	107.82	3	5	4.8	99.5	2	3	4	1	1.25	1.5	1.25
F6Z700	Striatin (Fragment) OS=Mus musculus GN=Strn PE=1 SV=1									28.94	1	1	5.2					36.23	1	2	14.6	93.95	2	3	14.2	1	2	0.75	1.25
Q80U38	Protein KHNYN OS=Mus musculus GN=Khnyn PE=2 SV=2					76.05	1	1	1.9	37.33	1	2	4.3									67.88	2	3	7	0.5	3	0.25	1.25
D3YUS5	Protein Rasal2 OS=Mus musculus GN=Rasal2 PE=1 SV=1	260.02	4	10	13.3	170.01	4	6	8.6	321.73	5	9	9.3	227.85	4	7	7.4	453.84	9	11	12.4	425.84	8	12	11.5	1.57143	1.25	0.923077	1.24817
P23116	Eukaryotic translation initiation factor 3 subunit A OS=Mus musculus GN=Eif3a PE=1 SV=5	1859.89	31	46	28.9	1270.29	20	39	28.1	1958.2	37	52	34.1	1082.42	22	32	24	1811.85	37	47	30.1	1703.81	35	49	32.5	1.175	1.60606	0.96	1.24702
Q9JIK5	Nucleolar RNA helicase 2 OS=Mus musculus GN=Ddx21 PE=1 SV=3	316.38	6	12	19.2	120.51	2	11	16.5	374.33	8	14	23.3	166.75	4	12	20.4	649.33	13	17	27.8	280.17	6	11	16.3	1.08333	1.15385	1.5	1.24573
O88796	Ribonuclease P protein subunit p30 OS=Mus musculus GN=Rpp30 PE=1 SV=1									157.7	4	6	29.1	29.13	1	4	19.8	69.69	2	3	14.9	35.77	1	2	11.2	1	1.4	1.33333	1.24444
A2AKG8	Focadhesin OS=Mus musculus GN=Focad PE=1 SV=1	77.38	2	5	3.4	49.49	1	2	0.9	141.03	4	6	4.8	127.19	2	4	2.3					64.75	1	2	1.3	2	1.4	0.333333	1.24444
A0A087WPL5	ATP-dependent RNA helicase A OS=Mus musculus GN=Dhx9 PE=1 SV=1	363.49	5	13	13.8	272.76	4	15	12.1	826.97	14	18	16.2	563.82	9	11	10.3	587.62	10	13	12.3	500.07	8	10	9.3	0.875	1.58333	1.27273	1.24369
Q62074	Protein kinase C iota type OS=Mus musculus GN=Prkci PE=1 SV=3	292.84	5	7	16.6	336.67	5	7	18.2	487.52	8	12	23.4	377.18	6	8	19.7	322.91	4	8	14.5	321.48	5	6	12.3	1	1.44444	1.28571	1.24339
D3Z6S1	Transmembrane protein 214 OS=Mus musculus GN=Tmem214 PE=1 SV=3					102.21	2	9	17.4	347.93	7	12	22.1	263.79	5	7	12.8	80.75	2	7	15.3	97.93	2	3	8.1	0.1	1.625	2	1.24167
Z4YJT3	La-related protein 1 OS=Mus musculus GN=Larp1 PE=1 SV=1	440.06	7	14	16	361.37	7	11	14.7	1184.8	23	26	35.2	559.61	11	17	24.3	920.7	16	25	31	1059.99	21	26	34.5	1.25	1.5	0.962963	1.23765
O88477	Insulin-like growth factor 2 mRNA-binding protein 1 OS=Mus musculus GN=Igf2bp1 PE=1 SV=1	758.71	13	21	34	785.84	13	20	33.8	899.68	13	18	33.3	499.83	8	13	25.5	608.11	11	16	30.3	560.16	11	12	20.6	1.04762	1.35714	1.30769	1.23748
Q8BMJ2	Leucine--tRNA ligase, cytoplasmic OS=Mus musculus GN=Lars PE=1 SV=2									176.81	5	7	6.5	59.95	1	4	4.8	189.51	5	9	9.4	109.09	3	8	6.6	1	1.6	1.11111	1.23704
F8WHL2	Coatomer subunit alpha OS=Mus musculus GN=Copa PE=1 SV=1	379.32	7	10	9.7	289.11	6	11	10.7	908.33	18	25	27.7	624.75	13	16	17.3	825.27	14	23	22.7	732.64	13	18	18.1	0.916667	1.52941	1.26316	1.23641
G3XA10	Heterogeneous nuclear ribonucleoprotein U, isoform CRA_b OS=Mus musculus GN=Gm28062 PE=4 SV=1	606.04	10	17	21.4	636.81	11	16	23	799.08	14	19	28.9	861.69	14	15	26.4	834.41	16	20	22.7	617.96	10	14	23.6	1.05882	1.25	1.4	1.23627
V9GXB6	Heterogeneous nuclear ribonucleoprotein L-like OS=Mus musculus GN=Hnrnpll PE=1 SV=1	63.01	1	5	18.7	169.48	3	4	15.7	139.57	3	5	26	86.77	2	3	16	218.72	4	4	20.2	97.24	2	4	16	1.2	1.5	1	1.23333
Q3U1J4	DNA damage-binding protein 1 OS=Mus musculus GN=Ddb1 PE=1 SV=2	238.91	5	13	16.9	195.27	4	9	10	621.01	12	18	21.6	427.67	10	15	20.4	726.32	13	19	21.8	421.88	8	17	21	1.4	1.1875	1.11111	1.23287
P62264	40S ribosomal protein S14 OS=Mus musculus GN=Rps14 PE=1 SV=3	890.17	13	17	41.7	632.83	9	13	41.1	1046.17	15	19	71.5	727.29	13	16	74.8	914.48	14	20	43	748.7	11	16	74.8	1.28571	1.17647	1.23529	1.23249
Q99LE6	ATP-binding cassette sub-family F member 2 OS=Mus musculus GN=Abcf2 PE=1 SV=1	1190.71	20	26	28.5	973.24	18	23	28.5	2151.91	35	46	46.8	1173.46	21	28	41.4	1568.2	29	37	47.5	1445.09	27	39	48.4	1.125	1.62069	0.95	1.2319
Q9DCL9	Multifunctional protein ADE2 OS=Mus musculus GN=Paics PE=1 SV=4	47.08	1	5	10.1	38.5	1	3	11.5	157.25	3	5	12.9	222.76	5	6	16.2	168.13	4	7	16.9	181.82	4	5	15.5	1.5	0.857143	1.33333	1.23016
P62830	60S ribosomal protein L23 OS=Mus musculus GN=Rpl23 PE=1 SV=1	689.2	10	14	57.1	381.9	6	8	55.7	765.93	13	18	74.3	561	9	15	73.6	641.27	11	14	72.1	767.73	13	17	72.9	1.66667	1.1875	0.833333	1.22917
Q8K2Z4	Condensin complex subunit 1 OS=Mus musculus GN=Ncapd2 PE=1 SV=2									492.75	12	15	15.8	194.79	4	8	7.1	307.45	6	9	8.3	212.19	5	10	9.9	1	1.77778	0.909091	1.22896
Q5SF07	Insulin-like growth factor 2 mRNA-binding protein 2 OS=Mus musculus GN=Igf2bp2 PE=1 SV=1	1741.78	25	31	47	1136.6	16	26	38	1281.32	21	24	38.5	918.92	14	17	34	769.66	14	19	32.9	647	12	17	34.3	1.18519	1.38889	1.11111	1.2284
Q8K2A1	PTB domain-containing engulfment adapter protein 1 OS=Mus musculus GN=Gulp1 PE=1 SV=1	104.41	2	3	10.2	102.18	2	2	7.6	369.81	8	10	24	290.14	6	8	22.7	254.82	5	8	22.4	268.71	6	7	22	1.33333	1.22222	1.125	1.22685
F8VQ29	Protein Iqgap3 OS=Mus musculus GN=Iqgap3 PE=1 SV=1	429.03	8	12	9.8	358.33	7	13	9.5	450.68	11	20	17.4	443.49	10	13	10.5	240.69	6	9	6.9	206.81	5	7	7.7	0.928571	1.5	1.25	1.22619
Q4VA53	Sister chromatid cohesion protein PDS5 homolog B OS=Mus musculus GN=Pds5b PE=1 SV=1					117.68	2	6	6.1	314.95	6	10	9.7	141.01	3	4	4.5	332.74	6	7	5.9	103.38	2	5	5.2	0.142857	2.2	1.33333	1.2254
B8JK81	Angiomotin-like protein 2 (Fragment) OS=Mus musculus GN=Amotl2 PE=1 SV=2																	122.06	2	4	11.2	29.31	1	2	7	1	1	1.66667	1.22222
Q91Z50	Flap endonuclease 1 OS=Mus musculus GN=Fen1 PE=1 SV=1									78.97	2	3	12.4	48.31	1	3	12.4	98.44	3	4	12.4	45.27	1	2	7.1	1	1	1.66667	1.22222
Q5SVY2	Peptidyl-prolyl cis-trans isomerase OS=Mus musculus GN=Ppia PE=1 SV=1									143.26	3	4	22.6	44.05	1	2	16.5	91.24	2	2	14.6	127.07	2	2	16.5	1	1.66667	1	1.22222
Q8VDV8	MIT domain-containing protein 1 OS=Mus musculus GN=Mitd1 PE=1 SV=1									172.43	3	4	14.9	145.96	2	2	10.8	71.4	2	2	7.6	56.61	1	2	10.8	1	1.66667	1	1.22222
Q4U4S6	Xin actin-binding repeat-containing protein 2 OS=Mus musculus GN=Xirp2 PE=1 SV=1	56.87	1	4	3.7	40.81	1	2	3.2																	1.66667	1	1	1.22222
P56135	ATP synthase subunit f, mitochondrial OS=Mus musculus GN=Atp5j2 PE=1 SV=3									96.3	2	4	37.5	90.5	2	2	23.9	72.27	2	2	23.9	78.74	2	2	23.9	1	1.66667	1	1.22222
A2ASS6	Titin OS=Mus musculus GN=Ttn PE=1 SV=1									31.14	1	9	1	33.65	1	5	1									1	1.66667	1	1.22222
G3X8W7	CDC23 (Cell division cycle 23, yeast, homolog), isoform CRA_a OS=Mus musculus GN=Cdc23 PE=1 SV=1									56.95	1	4	9.3	80.58	1	2	4.4									1	1.66667	1	1.22222
B1AT82	MCG6846, isoform CRA_c OS=Mus musculus GN=Prpsap1 PE=1 SV=1									113.13	3	3	14	31.68	1	2	14.3	106.54	3	3	16.6	31.65	1	2	9.6	1	1.33333	1.33333	1.22222
Q8K3A9	7SK snRNA methylphosphate capping enzyme OS=Mus musculus GN=Mepce PE=1 SV=2									42.37	1	1	3.2					47.87	1	1	1.7	43.84	1	2	2.9	1	2	0.666667	1.22222
Q91WB7	Ubiquitin domain-containing protein 1 OS=Mus musculus GN=Ubtd1 PE=2 SV=1									37.16	1	1	9.7	39.03	1	2	12.8	101.13	3	3	9.7	42.38	1	1	6.2	1	0.666667	2	1.22222
Q6NWW9	Fibronectin type III domain-containing protein 3B OS=Mus musculus GN=Fndc3b PE=1 SV=1	322.63	5	11	12.3	254.06	4	7	7.8	736.55	14	17	16.4	197.39	4	11	10.9	241.61	4	9	9.4	481.27	9	14	13.8	1.5	1.5	0.666667	1.22222
Q505K2	Protein FAM160A1 OS=Mus musculus GN=Fam160a1 PE=1 SV=2	43.77	1	1	1.5	48.78	1	2	2.2									44.18	1	1	0.6					0.666667	1	2	1.22222
Q3V449	Nicotinamide-nucleotide adenylyltransferase OS=Mus musculus GN=Nmnat1 PE=1 SV=1	40.08	1	1	6	37.54	1	1	6	94.12	2	3	16.1	35.18	1	1	3.9	52.25	1	1	3.9	52.47	1	2	9.8	1	2	0.666667	1.22222
P47856	Glutamine--fructose-6-phosphate aminotransferase [isomerizing] 1 OS=Mus musculus GN=Gfpt1 PE=1 SV=3									31.52	1	1	2.4					41.36	1	1	5.6	39.72	1	2	6.5	1	2	0.666667	1.22222
Q9JIF7	Coatomer subunit beta OS=Mus musculus GN=Copb1 PE=1 SV=1									114.14	3	7	13.6	142.14	4	5	6.3	301.99	7	7	11.6	213.49	4	5	9.4	1	1.33333	1.33333	1.22222
Q8CEJ2	MCG117705, isoform CRA_a OS=Mus musculus GN=Uxt PE=1 SV=1									38.83	1	3	24.2	32.47	1	1	8.3	49.77	1	1	8.3	41.45	1	2	15.3	1	2	0.666667	1.22222
F6VSP9	AP-2 complex subunit alpha-1 (Fragment) OS=Mus musculus GN=Ap2a1 PE=1 SV=1									54.77	1	1	29.8	108.02	2	2	54.4	58.88	1	1	29.8					1	0.666667	2	1.22222
P62267	40S ribosomal protein S23 OS=Mus musculus GN=Rps23 PE=1 SV=3	173.52	3	4	21.7	198.65	3	3	16.1	265.37	5	6	35	184.33	3	3	16.1	139.6	3	3	16.1	195.79	4	5	35.7	1.25	1.75	0.666667	1.22222
P07744	Keratin, type II cytoskeletal 4 OS=Mus musculus GN=Krt4 PE=1 SV=2	90.96	2	7	14.1	99.43	2	3	5.1									37.63	1	1	3	79.25	2	2	4.6	2	1	0.666667	1.22222
F8VQC1	Signal recognition particle subunit SRP72 OS=Mus musculus GN=Srp72 PE=1 SV=1	512.3	9	13	19.4	384.33	7	11	19.7	980.99	17	20	36.2	446.37	9	12	24.3	549.54	11	14	27.4	544.35	11	16	25.5	1.16667	1.61538	0.882353	1.22147
Q8VE97	Serine/arginine-rich splicing factor 4 OS=Mus musculus GN=Srsf4 PE=2 SV=1	191.24	3	5	8.2	295.34	5	6	12.9	186.33	4	6	9.8	59.2	1	4	7.2	177.54	4	6	9.8	192.95	4	4	5.7	0.857143	1.4	1.4	1.21905
D3YU17	Nicalin OS=Mus musculus GN=Ncln PE=1 SV=1									133.37	4	6	10.9	112.31	2	4	10.1	156.84	4	4	9.6	32.35	1	3	7.7	1	1.4	1.25	1.21667
Q4FJR4	Pdk3 protein OS=Mus musculus GN=Pdk3 PE=1 SV=1	127.1	2	2	7.7	130.92	2	3	11.3	160.27	3	6	19	118.05	2	4	10.4	173.04	3	5	17.1	75.19	1	3	10.6	0.75	1.4	1.5	1.21667
Q9D8E6	60S ribosomal protein L4 OS=Mus musculus GN=Rpl4 PE=1 SV=3	2419.35	34	39	51.6	1913.5	27	31	48.9	3174.66	48	52	58.2	2467.93	37	41	57	2824.16	42	50	60.1	2764.57	41	44	57.8	1.25	1.2619	1.13333	1.21508
G3UXT7	RNA-binding protein FUS (Fragment) OS=Mus musculus GN=Fus PE=1 SV=1	494.86	9	12	60.8	649.58	10	13	68.5	238.04	5	5	43.8	88.84	2	2	36.9	192.09	4	4	49.2	195.03	5	6	61.5	0.928571	2	0.714286	1.21429
Q922B2	Aspartate--tRNA ligase, cytoplasmic OS=Mus musculus GN=Dars PE=1 SV=2	98.6	2	2	9.8	42.17	1	4	12	530.59	12	16	38.1	355.05	8	11	28.1	381.2	8	12	25.7	226.59	5	7	15.8	0.6	1.41667	1.625	1.21389
Q8R1B4	Eukaryotic translation initiation factor 3 subunit C OS=Mus musculus GN=Eif3c PE=1 SV=1	1494.65	23	31	34.8	1386.9	24	29	25.5	1389.28	24	26	25.7	749.84	16	18	23.5	1152.66	20	22	26.5	1192.27	19	19	24.6	1.06667	1.42105	1.15	1.21257
Q8CJG0	Protein argonaute-2 OS=Mus musculus GN=Ago2 PE=1 SV=3	911.65	16	24	36.5	724.49	12	24	33.5	891.28	18	21	41.5	389.7	7	12	26	682.08	14	16	26.5	577.93	12	17	29.4	1	1.69231	0.944444	1.21225
Q6ZWY3	40S ribosomal protein S27-like OS=Mus musculus GN=Rps27l PE=1 SV=3	388.44	6	9	41.7	334.65	5	7	40.5	509.89	9	10	40.5	321.28	6	7	40.5	292.32	5	8	40.5	249.31	5	8	40.5	1.25	1.375	1	1.20833
Q5SFM8	RNA-binding protein 27 OS=Mus musculus GN=Rbm27 PE=1 SV=3									129.07	2	6	6.3	81.18	2	3	4.8	159.88	3	6	9.7	169.02	4	7	7.7	1	1.75	0.875	1.20833
Q8C2Q7	Heterogeneous nuclear ribonucleoprotein H OS=Mus musculus GN=Hnrnph1 PE=1 SV=1	972.71	14	17	48.7	942.06	14	17	42.2	839.03	13	16	43.9	633.2	9	10	34.1	798.73	12	13	34.1	512.09	8	12	35	1	1.54545	1.07692	1.20746
Q3UI84	Replication factor C subunit 4 OS=Mus musculus GN=Rfc4 PE=1 SV=1	714.14	12	15	34.9	773.13	12	15	37.3	692.84	14	19	43	298.93	7	12	30	484.71	10	12	29.7	385.17	9	11	34.1	1	1.53846	1.08333	1.20726
D3Z6U8	Fragile X mental retardation protein 1 homolog OS=Mus musculus GN=Fmr1 PE=1 SV=1	1358.01	19	29	42.8	1205.19	17	25	39.3	1463.62	23	28	46.5	986.36	16	20	35.9	1111.9	18	25	35.7	1281.21	22	23	41.6	1.15385	1.38095	1.08333	1.20604
P35550	rRNA 2~-O-methyltransferase fibrillarin OS=Mus musculus GN=Fbl PE=1 SV=2	141.75	3	6	27.2	143.63	3	5	23.2	102.21	2	4	15.3	102.15	2	3	11	200.53	3	5	20.2	212.27	3	4	11.3	1.16667	1.25	1.2	1.20556
A0A0B4J1E2	SNW domain-containing protein 1 OS=Mus musculus GN=Snw1 PE=1 SV=1	347.06	5	10	23.1	100.35	2	5	12.1	309.49	6	8	20	377.17	7	12	29.7	369.97	7	11	26.1	392.13	7	10	24.3	1.83333	0.692308	1.09091	1.20552
Q4FZH2	60S ribosomal protein L26 OS=Mus musculus GN=Rpl26 PE=1 SV=1	614.6	12	16	56.6	289.18	5	12	41.4	564.07	12	16	57.2	428.12	9	13	44.8	419.89	9	11	50.3	306.63	7	10	43.4	1.30769	1.21429	1.09091	1.2043
Q8VIJ6	Splicing factor, proline- and glutamine-rich OS=Mus musculus GN=Sfpq PE=1 SV=1	855.33	14	17	28.5	1119.82	18	23	35.3	801.05	14	18	25.2	506.04	10	11	22.2	568.16	10	13	19.5	287.23	5	10	14.2	0.75	1.58333	1.27273	1.20202
Q91VC3	Eukaryotic initiation factor 4A-III OS=Mus musculus GN=Eif4a3 PE=1 SV=3	631.09	11	19	40.9	654.6	11	16	37	560.41	11	16	38.7	315.31	7	13	29.4	578.69	12	16	36	329.99	7	13	31.1	1.17647	1.21429	1.21429	1.20168
Q5NTY0	DnaJ (Hsp40) homolog, subfamily A, member 1 OS=Mus musculus GN=Dnaja1 PE=1 SV=1	248.07	4	8	22.4	255.69	4	7	25.2	710.53	13	20	40.1	419.7	8	15	32.2	624.61	12	13	39.3	327.99	6	11	32.2	1.125	1.3125	1.16667	1.20139
Q6P572	Mtmr2 protein OS=Mus musculus GN=Mtmr2 PE=1 SV=1																	204.1	5	7	16.1	111.32	3	4	7.9	1	1	1.6	1.2
Q542X7	Chaperonin subunit 2 (Beta), isoform CRA_a OS=Mus musculus GN=Cct2 PE=1 SV=1	211.69	4	6	17.2	101.3	2	6	12	935.94	16	23	43.6	767.82	11	14	38.3	953.26	14	15	38.7	570.61	10	15	32.9	1	1.6	1	1.2
Q8BGZ7	Keratin, type II cytoskeletal 75 OS=Mus musculus GN=Krt75 PE=1 SV=1	199.9	3	7	14.2	202.96	3	4	10.3	181.96	3	3	7.1	149.76	3	3	7.1	152.53	3	3	8.5	160.79	3	3	8.5	1.6	1	1	1.2
E9QKQ5	Phosphatidate phosphatase LPIN1 OS=Mus musculus GN=Lpin1 PE=1 SV=1									154.7	2	3	4.3	71.83	1	1	4.3	83.2	1	2	4.3	166.19	3	4	5.7	1	2	0.6	1.2
A0A0M3HEQ7	Coatomer subunit gamma-2 (Fragment) OS=Mus musculus GN=Copg2 PE=4 SV=1	50.68	1	1	6.7					46.12	1	2	5	130.7	3	4	5									2	0.6	1	1.2
Q3ULT2	Actinin alpha 4 OS=Mus musculus GN=Actn4 PE=1 SV=1	1856.74	27	45	48.8	1005.04	17	25	33.2	1602.3	26	35	48	2246.99	36	47	53.8	2791.37	43	55	60.1	2463.94	40	51	57.5	1.76923	0.75	1.07692	1.19872
P97855	Ras GTPase-activating protein-binding protein 1 OS=Mus musculus GN=G3bp1 PE=1 SV=1	2279.13	32	41	53.1	1732.73	25	32	51.8	2484.21	37	43	61.1	1887.04	31	37	60.9	2117.07	35	42	62.8	1954.52	30	36	61.5	1.27273	1.15789	1.16216	1.19759
Q8K0D0	Cyclin-dependent kinase 17 OS=Mus musculus GN=Cdk17 PE=1 SV=2	214.92	4	6	11.5	98.14	2	4	9.6	335.84	7	7	13.8	132.85	3	5	10.7	198.07	4	5	11.3	254.19	6	6	13.4	1.4	1.33333	0.857143	1.19683
Q8BP92	Reticulocalbin-2 OS=Mus musculus GN=Rcn2 PE=1 SV=1	182.4	3	10	31.3	211.98	4	7	16.6	1006.05	14	16	42.8	809.2	11	13	33.4	940.56	15	17	37.2	956.26	14	17	39.1	1.375	1.21429	1	1.19643
Q4FZE6	40S ribosomal protein S7 OS=Mus musculus GN=Rps7 PE=1 SV=1	632.33	11	16	71.6	400.99	7	13	51.5	1198.25	20	25	71.1	1069.08	17	21	63.4	1024.37	20	24	76.8	1028.44	17	20	71.6	1.21429	1.18182	1.19048	1.19553
[truncated: 1,733 more rows]

## Sheet: Selection
Selection Procedure:
	Step	Operation	Hits remaining
	1	Rank hits by fold change (FC)	3733 hits
	2	Discard hits with mean FC<3.5	230 hits
	3	Discard hits if: (i) FC<2.0 in n=2-3 experiments; (ii) FC<2.0 in n=1 experiment if mean FC<5.0	49 hits
	4	If there are other entries for same protein: calculate combined FC and repeat steps 2-4	25 hits
	5	Discard hits with FC<3.0 in one or more experiments	14 hits
Definitions:
	Score:	Sum of the ion scores of all peptides that were identified for a given protein.
	# Pept:	Number of distinct peptide sequences identified for the protein.
	PSM:	Peptide spectrum matches. Total number of peptide spectra matched for the protein (some peptides are identified repeatedly, so PSM > #Pept).
	% Coverage:	Percentage of protein sequence coverage by the identified peptides.
	PSM ratios WT/KO:	Ratios (z) for each protein and experiment are calculated as: z=(x+1)/(y+1), where x and y are the PSM values for the Evc-WT and Evc-KO conditions, respectively (a unit is added to x and y to avoid dividing by zero in cases where PSM=0 in all Evc-KO samples)
	Fold Change (FC):	Synonymous with PSM ratios WT/KO

## Sheet: volcano plot analysis
ID	Protein Name	Description	PSM Exp1 WT	PSM Exp2 WT	PSM Exp3 WT	PSM Exp1 KO	PSM Exp2 KO	PSM Exp3 KO	normalized PSM Exp1 WT	normalized PSM Exp2 WT	normalized PSM Exp3 WT	normalized PSM Exp1 WT	normalized PSM Exp2 WT	normalized PSM Exp3 WT	Student's t-test	FC Exp1	FC Exp2	FC Exp3	FC mean	Log2 (FC mean)	(-) Log p-value
P57680 & F6Z2D6	EVC	Ellis-van Creveld syndrome protein homolog OS=Mus musculus GN=Evc PE=1 SV=2	64	20	24	0	0	0	98.4848	95.4545	96.1538	1.51515	4.54545	3.84615	2.21853e-07	65	21	25	37	5.20945	6.65393
Q8K1G2	EVC2	Limbin OS=Mus musculus GN=Evc2 PE=1 SV=1	60	18	28	0	0	0	98.3871	95	96.6667	1.6129	5	3.33333	2.88259e-07	61	19	29	36.3333	5.18322	6.54022
Q9JMH9	MYO18A	Unconventional myosin-XVIIIa OS=Mus musculus GN=Myo18a PE=1 SV=2	84	0	61	0	0	52	98.8372	50	53.913	1.16279	50	46.087	0.187673	85	1	1.16981	29.0566	4.86079	0.726599
A3KGU5	SPTAN1	Spectrin alpha chain, non-erythrocytic 1 OS=Mus musculus GN=Sptan1 PE=1 SV=1	68	0	97	0	0	56	98.5714	50	63.2258	1.42857	50	36.7742	0.114883	69	1	1.7193	23.9064	4.57933	0.939743
Q7TPR4	ACTN1	Alpha-actinin-1 OS=Mus musculus GN=Actn1 PE=1 SV=1	65	61	75	0	71	68	98.5075	46.2687	52.4138	1.49254	53.7313	47.5862	0.248502	66	0.861111	1.10145	22.6542	4.50171	0.60467
Q6PCQ0 & F6R782	IQCE	IQ domain-containing protein E OS=Mus musculus GN=Iqce PE=1 SV=1	37	5	8	0	0	0	97.4359	85.7143	90	2.5641	14.2857	10	7.09709e-05	38	6	9	17.6667	4.14296	4.14892
E9Q5F4	ACTB	Actin, cytoplasmic 1 (Fragment) OS=Mus musculus GN=Actb PE=1 SV=1	47	49	0	41	0	0	53.3333	98.0392	50	46.6667	1.96078	50	0.192937	1.14286	50	1	17.381	4.11944	0.714584
A0A087WS18	CLASP1	CLIP-associating protein 1 OS=Mus musculus GN=Clasp1 PE=1 SV=1	0	56	42	0	44	0	50	55.8824	97.7273	50	44.1176	2.27273	0.167863	1	1.26667	43	15.0889	3.91541	0.775046
F8WGM8	ACTG1	Actin, cytoplasmic 2 (Fragment) OS=Mus musculus GN=Actg1 PE=1 SV=1	40	0	48	0	50	47	97.619	1.92308	50.5155	2.38095	98.0769	49.4845	0.999263	41	0.0196078	1.02083	14.0135	3.80874	0.000320195
E9Q8Z5	CTNND1	Catenin delta-1 OS=Mus musculus GN=Ctnnd1 PE=1 SV=1	20	31	36	21	26	0	48.8372	54.2373	97.3684	51.1628	45.7627	2.63158	0.196427	0.954545	1.18519	37	13.0466	3.7056	0.706799
E9Q3X0	MVP	Major vault protein OS=Mus musculus GN=Mvp PE=1 SV=1	0	22	37	48	28	0	2	44.2308	97.4359	98	55.7692	2.5641	0.919099	0.0204082	0.793103	38	12.9378	3.69352	0.0366378
H3BKH9	ARHGEF2	Rho guanine nucleotide exchange factor 2 OS=Mus musculus GN=Arhgef2 PE=1 SV=1	24	0	34	23	0	0	51.0204	50	97.2222	48.9796	50	2.77778	0.217994	1.04167	1	35	12.3472	3.62611	0.661555
Q9D6F9	TUBB4A	Tubulin beta-4A chain OS=Mus musculus GN=Tubb4a PE=1 SV=3	34	40	36	0	37	45	97.2222	51.8987	44.5783	2.77778	48.1013	55.4217	0.279042	35	1.07895	0.804348	12.2944	3.61993	0.554331
D3YUW7	CGN	Cingulin OS=Mus musculus GN=Cgn PE=1 SV=1	9	12	24	0	0	1	90.9091	92.8571	92.5926	9.09091	7.14286	7.40741	6.59682e-08	10	13	12.5	11.8333	3.56478	7.18067
F6QLP8	CALD1	Protein Cald1 (Fragment) OS=Mus musculus GN=Cald1 PE=1 SV=1	31	10	20	0	31	27	96.9697	25.5814	42.8571	3.0303	74.4186	57.1429	0.752506	32	0.34375	0.75	11.0312	3.46352	0.12349
Q8BKX1	BAIAP2	Brain-specific angiogenesis inhibitor 1-associated protein 2 OS=Mus musculus GN=Baiap2 PE=1 SV=2	24	25	28	20	0	26	54.3478	96.2963	51.7857	45.6522	3.7037	48.2143	0.161883	1.19048	26	1.07407	9.42152	3.23596	0.790799
A2A5S3	STAU1	Double-stranded RNA-binding protein Staufen homolog 1 OS=Mus musculus GN=Stau1 PE=1 SV=1	23	24	25	0	12	22	96	65.7895	53.0612	4	34.2105	46.9388	0.0742854	24	1.92308	1.13043	9.01784	3.17278	1.1291
Q8VDY4 & F6XAI7	EFCAB7	EF-hand calcium-binding domain-containing protein 7 OS=Mus musculus GN=Efcab7 PE=2 SV=1	15	3	5	0	0	0	94.1176	80	85.7143	5.88235	20	14.2857	0.000226386	16	4	6	8.66667	3.11548	3.64515
Q61468	MSLN	Mesothelin OS=Mus musculus GN=Msln PE=1 SV=1	5	9	8	0	0	0	85.7143	90.9091	90	14.2857	9.09091	10	4.29872e-06	6	10	9	8.33333	3.05889	5.36666
Q3V1Z5	RPS4L	40S ribosomal protein S4 OS=Mus musculus GN=Rps4l PE=1 SV=1	16	25	21	15	17	0	51.5152	59.0909	95.6522	48.4848	40.9091	4.34783	0.123487	1.0625	1.44444	22	8.16898	3.03016	0.90838
D3YZ62	MYO5A	Unconventional myosin-Va OS=Mus musculus GN=Myo5a PE=1 SV=1	22	3	32	0	23	30	95.8333	14.2857	51.5625	4.16667	85.7143	48.4375	0.826737	23	0.166667	1.06452	8.07706	3.01383	0.0826327
E9Q852	MLLT4	Afadin OS=Mus musculus GN=Mllt4 PE=1 SV=2	46	11	20	27	7	0	62.6667	60	95.4545	37.3333	40	4.54545	0.0479762	1.67857	1.5	21	8.05952	3.01069	1.31897
Q9DBG3	AP2B1	AP-2 complex subunit beta OS=Mus musculus GN=Ap2b1 PE=1 SV=1	21	25	24	0	35	27	95.6522	41.9355	47.1698	4.34783	58.0645	52.8302	0.392236	22	0.722222	0.892857	7.87169	2.97667	0.406453
D3Z2H2	CTNND1	Catenin delta-1 OS=Mus musculus GN=Ctnnd1 PE=1 SV=1	20	32	37	0	26	35	95.4545	55	51.3514	4.54545	45	48.6486	0.159041	21	1.22222	1.05556	7.75926	2.95592	0.79849
Q03350	THBS2	Thrombospondin-2 OS=Mus musculus GN=Thbs2 PE=1 SV=2	16	4	0	0	0	0	94.4444	83.3333	50	5.55556	16.6667	50	0.051606	17	5	1	7.66667	2.9386	1.2873
P11103	PARP1	Poly [ADP-ribose] polymerase 1 OS=Mus musculus GN=Parp1 PE=1 SV=3	0	21	24	47	0	33	2.04082	95.6522	42.3729	97.9592	4.34783	57.6271	0.87124	0.0208333	22	0.735294	7.58538	2.92322	0.059862
Q80YF6	UPK3B	Uroplakin-3b OS=Mus musculus GN=Upk3b PE=1 SV=1	5	9	5	0	0	0	85.7143	90.9091	85.7143	14.2857	9.09091	14.2857	6.81048e-06	6	10	6	7.33333	2.87447	5.16682
G3UWX1	RFC1	Replication factor C subunit 1 OS=Mus musculus GN=Rfc1 PE=1 SV=2	22	15	18	19	11	0	53.4884	57.1429	95	46.5116	42.8571	5	0.119315	1.15	1.33333	19	7.16111	2.84018	0.923303
Q3UC82	LIG3	DNA ligase OS=Mus musculus GN=Lig3 PE=1 SV=1	28	14	17	23	9	0	54.717	60	94.7368	45.283	40	5.26316	0.089335	1.20833	1.5	18	6.90278	2.78718	1.04898
A0A087WS16	COL6A3	Protein Col6a3 OS=Mus musculus GN=Col6a3 PE=1 SV=1	19	0	1	0	3	5	95.2381	20	25	4.7619	80	75	0.858957	20	0.25	0.333333	6.86111	2.77844	0.0660285
A0A0J9YUS5	EIF4G1	Eukaryotic translation initiation factor 4 gamma 1 OS=Mus musculus GN=Eif4g1 PE=1 SV=1	0	17	11	0	0	13	50	94.7368	46.1538	50	5.26316	53.8462	0.284011	1	18	0.857143	6.61905	2.72662	0.546665
Q9DBY8	NVL	Nuclear valosin-containing protein-like OS=Mus musculus GN=Nvl PE=1 SV=1	13	8	12	0	1	10	93.3333	81.8182	54.1667	6.66667	18.1818	45.8333	0.0323639	14	4.5	1.18182	6.56061	2.71383	1.48994
B2RTK3	HIST1H2BM	Histone H2B OS=Mus musculus GN=Hist1h2bm PE=1 SV=1	16	8	9	0	9	11	94.4444	47.3684	45.4545	5.55556	52.6316	54.5455	0.334405	17	0.9	0.833333	6.24444	2.64257	0.475727
D3Z6F5	ATP5A1	ATP synthase subunit alpha OS=Mus musculus GN=Atp5a1 PE=1 SV=1	4	15	16	9	16	0	33.3333	48.4848	94.4444	66.6667	51.5152	5.55556	0.537358	0.5	0.941176	17	6.14706	2.6199	0.269736
E9Q9H2	DNAJC2	DnaJ homolog subfamily C member 2 OS=Mus musculus GN=Dnajc2 PE=1 SV=1	6	0	15	4	0	0	58.3333	50	94.1176	41.6667	50	5.88235	0.1417	1.4	1	16	6.13333	2.61667	0.848631
Q6Y5D8	ARHGAP10	Rho GTPase-activating protein 10 OS=Mus musculus GN=Arhgap10 PE=1 SV=2	17	7	8	12	0	0	58.0645	88.8889	90	41.9355	11.1111	10	0.0172924	1.38462	8	9	6.12821	2.61546	1.76214
P58022	LOXL2	Lysyl oxidase homolog 2 OS=Mus musculus GN=Loxl2 PE=1 SV=2	2	7	6	0	0	0	75	88.8889	87.5	25	11.1111	12.5	0.000413578	3	8	7	6	2.58496	3.38344
Q61216	MRE11A	Double-strand break repair protein MRE11A OS=Mus musculus GN=Mre11a PE=1 SV=1	10	4	1	0	0	0	91.6667	83.3333	66.6667	8.33333	16.6667	33.3333	0.00418107	11	5	2	6	2.58496	2.37871
A2API8	AKAP2	A-kinase anchor protein 2 OS=Mus musculus GN=Akap2 PE=1 SV=1	0	7	8	0	0	0	50	88.8889	90	50	11.1111	10	0.0474612	1	8	9	6	2.58496	1.32366
Q9CY21	WBSCR22	Probable 18S rRNA (guanine-N(7))-methyltransferase OS=Mus musculus GN=Wbscr22 PE=1 SV=1	6	13	0	3	0	0	63.6364	93.3333	50	36.3636	6.66667	50	0.10373	1.75	14	1	5.58333	2.48113	0.984097
Q5M9K9	RPL31	60S ribosomal protein L31 OS=Mus musculus GN=Rpl31 PE=1 SV=1	12	13	10	11	0	10	52	93.3333	50	48	6.66667	50	0.204789	1.08333	14	1	5.36111	2.42253	0.688692
Q3TYK3	NFIX	Nuclear factor 1 OS=Mus musculus GN=Nfix PE=1 SV=1	7	13	0	8	0	0	47.0588	93.3333	50	52.9412	6.66667	50	0.272004	0.888889	14	1	5.2963	2.40498	0.565425
P17156	HSPA2	Heat shock-related 70 kDa protein 2 OS=Mus musculus GN=Hspa2 PE=1 SV=2	10	12	0	8	0	0	55	92.8571	50	45	7.14286	50	0.170749	1.22222	13	1	5.07407	2.34314	0.767641
Q9R099	TBL2	Transducin beta-like protein 2 OS=Mus musculus GN=Tbl2 PE=1 SV=2	6	12	0	5	0	0	53.8462	92.8571	50	46.1538	7.14286	50	0.183069	1.16667	13	1	5.05556	2.33787	0.737385
E9PV04	GM8994	Protein Gm8994 OS=Mus musculus GN=Gm8994 PE=3 SV=2	15	12	0	13	0	0	53.3333	92.8571	50	46.6667	7.14286	50	0.188812	1.14286	13	1	5.04762	2.3356	0.723971
Q9CZX8	RPS19	40S ribosomal protein S19 OS=Mus musculus GN=Rps19 PE=1 SV=3	13	12	10	11	0	12	53.8462	92.8571	45.8333	46.1538	7.14286	54.1667	0.239542	1.16667	13	0.846154	5.00427	2.32316	0.620618
Q07139	ECT2	Protein ECT2 OS=Mus musculus GN=Ect2 PE=1 SV=2	0	6	6	0	0	0	50	87.5	87.5	50	12.5	12.5	0.0474207	1	7	7	5	2.32193	1.32403
D3Z1J5	PALLD	Palladin (Fragment) OS=Mus musculus GN=Palld PE=1 SV=1	12	17	18	0	19	18	92.8571	47.3684	50	7.14286	52.6316	50	0.267797	13	0.9	1	4.96667	2.31228	0.572194
D3YYU8	OBSL1	Obscurin-like protein 1 OS=Mus musculus GN=Obsl1 PE=1 SV=1	6	0	13	9	15	0	41.1765	5.88235	93.3333	58.8235	94.1176	6.66667	0.867147	0.7	0.0625	14	4.92083	2.2989	0.061907
P47758	SRPRB	Signal recognition particle receptor subunit beta OS=Mus musculus GN=Srprb PE=1 SV=1	0	14	11	0	9	0	50	60	92.3077	50	40	7.69231	0.125604	1	1.5	12	4.83333	2.27302	0.900995
A0A0G2JDK9	RPL9	60S ribosomal protein L9 (Fragment) OS=Mus musculus GN=Rpl9 PE=1 SV=1	6	0	11	4	0	0	58.3333	50	92.3077	41.6667	50	7.69231	0.138798	1.4	1	12	4.8	2.26303	0.857616
P62843	RPS15	40S ribosomal protein S15 OS=Mus musculus GN=Rps15 PE=1 SV=2	12	9	0	3	0	0	76.4706	90.9091	50	23.5294	9.09091	50	0.0568821	3.25	10	1	4.75	2.24793	1.24502
Q3UYU2	TRMT2A	HpaII tinys locus 9c, isoform CRA_a OS=Mus musculus GN=Trmt2a PE=1 SV=1	10	12	7	0	6	5	91.6667	65	57.1429	8.33333	35	42.8571	0.045052	11	1.85714	1.33333	4.73016	2.24189	1.34629
Q0VGY8	TANC1	Protein TANC1 OS=Mus musculus GN=Tanc1 PE=1 SV=2	20	2	8	9	0	0	67.7419	75	90	32.2581	25	10	0.00399931	2.1	3	9	4.7	2.23266	2.39801
Q3TWV4	AP2M1	AP-2 complex subunit mu OS=Mus musculus GN=Ap2m1 PE=1 SV=1	16	0	11	15	0	0	51.5152	50	92.3077	48.4848	50	7.69231	0.210267	1.0625	1	12	4.6875	2.22882	0.677229
Q6A4J8	USP7	Ubiquitin carboxyl-terminal hydrolase 7 OS=Mus musculus GN=Usp7 PE=1 SV=1	3	4	4	0	0	0	80	83.3333	83.3333	20	16.6667	16.6667	2.11242e-06	4	5	5	4.66667	2.22239	5.67522
Q564E2	LDHA	L-lactate dehydrogenase OS=Mus musculus GN=Ldha PE=1 SV=1	0	5	6	0	0	0	50	85.7143	87.5	50	14.2857	12.5	0.0475421	1	6	7	4.66667	2.22239	1.32292
Q8VCD5	MED17	Mediator of RNA polymerase II transcription subunit 17 OS=Mus musculus GN=Med17 PE=1 SV=1	0	6	5	0	0	0	50	87.5	85.7143	50	12.5	14.2857	0.0475421	1	7	6	4.66667	2.22239	1.32292
Q60996	PPP2R5C	Serine/threonine-protein phosphatase 2A 56 kDa regulatory subunit gamma isoform OS=Mus musculus GN=Ppp2r5c PE=1 SV=2	4	7	6	0	0	6	83.3333	88.8889	50	16.6667	11.1111	50	0.0486302	5	8	1	4.66667	2.22239	1.31309
G5E8R2	TPM1	Tropomyosin 1, alpha, isoform CRA_k OS=Mus musculus GN=Tpm1 PE=1 SV=1	12	6	14	0	24	24	92.8571	21.875	37.5	7.14286	78.125	62.5	0.96337	13	0.28	0.6	4.62667	2.20997	0.0162067
A2AL12	HNRNPA3	Heterogeneous nuclear ribonucleoprotein A3 OS=Mus musculus GN=Hnrnpa3 PE=1 SV=1	25	10	6	16	0	6	60.4651	91.6667	50	39.5349	8.33333	50	0.121042	1.52941	11	1	4.5098	2.17306	0.917064
G5E8S8	MPP7	MAGUK p55 subfamily member 7 OS=Mus musculus GN=Mpp7 PE=1 SV=1	3	6	5	0	1	0	80	77.7778	85.7143	20	22.2222	14.2857	4.87156e-05	4	3.5	6	4.5	2.16993	4.31233
Q8BML1	MICAL2	Protein-methionine sulfoxide oxidase MICAL2 OS=Mus musculus GN=Mical2 PE=1 SV=1	6	4	8	0	0	5	87.5	83.3333	60	12.5	16.6667	40	0.0112206	7	5	1.5	4.5	2.16993	1.94998
F6ZSG0	MTDH	Protein LYRIC (Fragment) OS=Mus musculus GN=Mtdh PE=1 SV=1	7	7	8	0	7	1	88.8889	50	81.8182	11.1111	50	18.1818	0.0494668	8	1	4.5	4.5	2.16993	1.30569
G5E902	SLC25A3	MCG10343, isoform CRA_b OS=Mus musculus GN=Slc25a3 PE=1 SV=1	7	10	10	8	0	6	47.0588	91.6667	61.1111	52.9412	8.33333	38.8889	0.148961	0.888889	11	1.57143	4.48677	2.16568	0.826929
A6PWS5	GSN	Gelsolin (Fragment) OS=Mus musculus GN=Gsn PE=1 SV=1	11	8	13	0	17	14	92.3077	33.3333	48.2759	7.69231	66.6667	51.7241	0.558797	12	0.5	0.933333	4.47778	2.16278	0.252746
A2AFQ9	GEMIN5	Gem-associated protein 5 OS=Mus musculus GN=Gemin5 PE=1 SV=1	5	9	6	2	0	4	66.6667	90.9091	58.3333	33.3333	9.09091	41.6667	0.0335361	2	10	1.4	4.46667	2.1592	1.47449
A2AF47	DOCK11	Dedicator of cytokinesis protein 11 OS=Mus musculus GN=Dock11 PE=1 SV=1	26	14	11	6	1	5	79.4118	88.2353	66.6667	20.5882	11.7647	33.3333	0.00315359	3.85714	7.5	2	4.45238	2.15458	2.5012
O08579	EMD	Emerin OS=Mus musculus GN=Emd PE=1 SV=1	10	10	10	12	7	0	45.8333	57.8947	91.6667	54.1667	42.1053	8.33333	0.193757	0.846154	1.375	11	4.40705	2.13981	0.712743
Q9ESL4	ZAK	Mitogen-activated protein kinase kinase kinase MLT OS=Mus musculus GN=Zak PE=1 SV=1	3	5	6	0	2	0	80	66.6667	87.5	20	33.3333	12.5	0.00286908	4	2	7	4.33333	2.11548	2.54226
Q91YR5	METTL13	Methyltransferase-like protein 13 OS=Mus musculus GN=Mettl13 PE=1 SV=1	0	6	4	0	0	0	50	87.5	83.3333	50	12.5	16.6667	0.0481276	1	7	5	4.33333	2.11548	1.31761
Q4FJV4	ANXA1	Annexin OS=Mus musculus GN=Anxa1 PE=1 SV=1	0	6	4	0	0	0	50	87.5	83.3333	50	12.5	16.6667	0.0481276	1	7	5	4.33333	2.11548	1.31761
F6YLI0	CAPRIN1	Caprin-1 (Fragment) OS=Mus musculus GN=Caprin1 PE=1 SV=1	0	4	6	0	0	0	50	83.3333	87.5	50	16.6667	12.5	0.0481276	1	5	7	4.33333	2.11548	1.31761
P60469	PPFIA3	Liprin-alpha-3 OS=Mus musculus GN=Ppfia3 PE=1 SV=2	0	4	6	0	0	0	50	83.3333	87.5	50	16.6667	12.5	0.0481276	1	5	7	4.33333	2.11548	1.31761
A2AU62	RALY	RNA-binding protein Raly (Fragment) OS=Mus musculus GN=Raly PE=1 SV=1	7	6	4	7	0	0	50	87.5	83.3333	50	12.5	16.6667	0.0481276	1	7	5	4.33333	2.11548	1.31761
P56960	EXOSC10	Exosome component 10 OS=Mus musculus GN=Exosc10 PE=1 SV=2	0	7	3	0	0	0	50	88.8889	80	50	11.1111	20	0.0508324	1	8	4	4.33333	2.11548	1.29386
Q5FWB7	ALDOA	Fructose-bisphosphate aldolase OS=Mus musculus GN=Aldoa PE=1 SV=1	0	2	8	0	0	0	50	75	90	50	25	10	0.0584063	1	3	9	4.33333	2.11548	1.23354
P62631	EEF1A2	Elongation factor 1-alpha 2 OS=Mus musculus GN=Eef1a2 PE=1 SV=1	10	12	14	0	14	16	91.6667	46.4286	46.875	8.33333	53.5714	53.125	0.333625	11	0.866667	0.882353	4.24967	2.08735	0.476742
G5E896	EDC4	Enhancer of mRNA decapping 4, isoform CRA_b OS=Mus musculus GN=Edc4 PE=1 SV=1	10	4	0	0	6	0	91.6667	41.6667	50	8.33333	58.3333	50	0.367086	11	0.714286	1	4.2381	2.08342	0.435232
Q8K0V4	CNOT3	CCR4-NOT transcription complex subunit 3 OS=Mus musculus GN=Cnot3 PE=1 SV=1	12	10	4	11	0	7	52	91.6667	38.4615	48	8.33333	61.5385	0.396495	1.08333	11	0.625	4.23611	2.08274	0.401762
P80317	CCT6A	T-complex protein 1 subunit zeta OS=Mus musculus GN=Cct6a PE=1 SV=3	9	21	18	0	15	15	90.9091	57.8947	54.2857	9.09091	42.1053	45.7143	0.0982386	10	1.375	1.1875	4.1875	2.06609	1.00772
Q3UV11	KRT6B	Keratin, type II cytoskeletal 6B OS=Mus musculus GN=Krt6b PE=1 SV=1	10	0	4	0	3	3	91.6667	20	55.5556	8.33333	80	44.4444	0.71476	11	0.25	1.25	4.16667	2.05889	0.14584
A2AJI0	MAP7D1	MAP7 domain-containing protein 1 OS=Mus musculus GN=Map7d1 PE=1 SV=1	5	9	10	6	0	6	46.1538	90.9091	61.1111	53.8462	9.09091	38.8889	0.159355	0.857143	10	1.57143	4.14286	2.05063	0.797633
Q5SQX6	CYFIP2	Cytoplasmic FMR1-interacting protein 2 OS=Mus musculus GN=Cyfip2 PE=1 SV=2	8	0	10	6	7	0	56.25	11.1111	91.6667	43.75	88.8889	8.33333	0.864019	1.28571	0.125	11	4.1369	2.04855	0.0634769
Q8CFI7	POLR2B	DNA-directed RNA polymerase II subunit RPB2 OS=Mus musculus GN=Polr2b PE=1 SV=2	3	5	6	0	0	2	80	85.7143	70	20	14.2857	30	0.000920344	4	6	2.33333	4.11111	2.03953	3.03605
A0ELI5	EDC3	Enhancer of mRNA-decapping protein 3 OS=Mus musculus GN=Edc3 PE=1 SV=1	3	7	6	0	5	0	80	57.1429	87.5	20	42.8571	12.5	0.018237	4	1.33333	7	4.11111	2.03953	1.73905
A2AGT5	CKAP5	Cytoskeleton-associated protein 5 OS=Mus musculus GN=Ckap5 PE=1 SV=1	26	7	15	16	0	5	61.3636	88.8889	72.7273	38.6364	11.1111	27.2727	0.0125667	1.58824	8	2.66667	4.08497	2.03032	1.90078
Q00PI9	HNRNPUL2	Heterogeneous nuclear ribonucleoprotein U-like protein 2 OS=Mus musculus GN=Hnrnpul2 PE=1 SV=2	10	4	4	4	0	0	68.75	83.3333	83.3333	31.25	16.6667	16.6667	0.00115954	2.2	5	5	4.06667	2.02385	2.93571
A0A0J9YU82	STARD13	StAR-related lipid transfer protein 13 OS=Mus musculus GN=Stard13 PE=1 SV=1	4	11	7	0	1	6	83.3333	85.7143	53.3333	16.6667	14.2857	46.6667	0.0306535	5	6	1.14286	4.04762	2.01707	1.51352
Q8R3H7	HS2ST1	Heparan sulfate 2-O-sulfotransferase 1 OS=Mus musculus GN=Hs2st1 PE=1 SV=2	2	4	3	0	0	0	75	83.3333	80	25	16.6667	20	6.71067e-05	3	5	4	4	2	4.17323
J3QM81	ANKZF1	Ankyrin repeat and zinc finger domain-containing protein 1 OS=Mus musculus GN=Ankzf1 PE=1 SV=1	2	5	2	0	0	0	75	85.7143	75	25	14.2857	25	0.000347891	3	6	3	4	2	3.45856
Q545R0	CTNNA1	Catenin (Cadherin associated protein), alpha 1 OS=Mus musculus GN=Ctnna1 PE=1 SV=1	11	14	14	3	1	9	75	88.2353	60	25	11.7647	40	0.0133399	3	7.5	1.5	4	2	1.87485
E9PVX6	MKI67	Protein Mki67 OS=Mus musculus GN=Mki67 PE=1 SV=1	5	0	4	0	0	0	85.7143	50	83.3333	14.2857	50	16.6667	0.0476634	6	1	5	4	2	1.32181
Q9CQV8	YWHAB	14-3-3 protein beta/alpha OS=Mus musculus GN=Ywhab PE=1 SV=3	0	4	5	0	0	0	50	83.3333	85.7143	50	16.6667	14.2857	0.0476634	1	5	6	4	2	1.32181
Q9CQ73	PKP2	Plakophilin 2 OS=Mus musculus GN=Pkp2 PE=1 SV=1	0	4	5	0	0	0	50	83.3333	85.7143	50	16.6667	14.2857	0.0476634	1	5	6	4	2	1.32181
Q8K4F6	NSUN5	Probable 28S rRNA (cytosine-C(5))-methyltransferase OS=Mus musculus GN=Nsun5 PE=2 SV=2	0	4	5	0	0	0	50	83.3333	85.7143	50	16.6667	14.2857	0.0476634	1	5	6	4	2	1.32181
Q9Z1Q9	VARS	Valine--tRNA ligase OS=Mus musculus GN=Vars PE=1 SV=1	0	5	4	0	0	0	50	85.7143	83.3333	50	14.2857	16.6667	0.0476634	1	6	5	4	2	1.32181
Z4YJV4	OGDH	2-oxoglutarate dehydrogenase, mitochondrial OS=Mus musculus GN=Ogdh PE=1 SV=1	0	5	4	0	0	0	50	85.7143	83.3333	50	14.2857	16.6667	0.0476634	1	6	5	4	2	1.32181
Q99K74	MED24	Mediator of RNA polymerase II transcription subunit 24 OS=Mus musculus GN=Med24 PE=1 SV=1	5	4	0	0	0	0	85.7143	83.3333	50	14.2857	16.6667	50	0.0476634	6	5	1	4	2	1.32181
H3BIZ7	FRMD4A	FERM domain-containing protein 4A OS=Mus musculus GN=Frmd4a PE=1 SV=1	8	11	11	0	5	11	90	66.6667	50	10	33.3333	50	0.0826867	9	2	1	4	2	1.08256
H7BXB1	CSNK1A1	Casein kinase I isoform alpha OS=Mus musculus GN=Csnk1a1 PE=1 SV=1	0	9	5	0	0	5	50	90.9091	50	50	9.09091	50	0.2302	1	10	1	4	2	0.637895
Q8C4C9	DNAJB12	DnaJ (Hsp40) homolog, subfamily B, member 12, isoform CRA_d OS=Mus musculus GN=Dnajb12 PE=1 SV=1	3	9	5	3	0	6	50	90.9091	46.1538	50	9.09091	53.8462	0.289459	1	10	0.857143	3.95238	1.98272	0.538414
Q7TSC1	PRRC2A	Protein PRRC2A OS=Mus musculus GN=Prrc2a PE=1 SV=1	38	8	10	38	0	5	50	90	64.7059	50	10	35.2941	0.0918586	1	9	1.83333	3.94444	1.97982	1.03688
Q5BL18	MATR3	Matrin 3 OS=Mus musculus GN=Matr3 PE=1 SV=1	9	9	0	5	0	7	62.5	90.9091	11.1111	37.5	9.09091	88.8889	0.784009	1.66667	10	0.125	3.93056	1.97473	0.105679
F6TFN2	LMO7	Protein Lmo7 (Fragment) OS=Mus musculus GN=Lmo7 PE=1 SV=1	10	6	7	0	12	32	91.6667	35	19.5122	8.33333	65	80.4878	0.938485	11	0.538462	0.242424	3.92696	1.97341	0.0275729
Q3UCF2	CDC5L	Cell division cycle 5-like protein OS=Mus musculus GN=Cdc5l PE=1 SV=1	4	4	6	0	0	3	83.3333	83.3333	63.6364	16.6667	16.6667	36.3636	0.0044908	5	5	1.75	3.91667	1.96963	2.34768
Q6DFV1	NCAPG2	Condensin-2 complex subunit G2 OS=Mus musculus GN=Ncapg2 PE=1 SV=2	11	8	4	7	0	3	60	90	55.5556	40	10	44.4444	0.0726775	1.5	9	1.25	3.91667	1.96963	1.1386
Q9R190	MTA2	Metastasis-associated protein MTA2 OS=Mus musculus GN=Mta2 PE=1 SV=1	5	3	6	7	0	0	42.8571	80	87.5	57.1429	20	12.5	0.108267	0.75	4	7	3.91667	1.96963	0.965505
Q8CGF1	ARHGAP29	Rho GTPase-activating protein 29 OS=Mus musculus GN=Arhgap29 PE=1 SV=1	11	8	8	6	0	8	63.1579	90	50	36.8421	10	50	0.100317	1.71429	9	1	3.90476	1.96523	0.998624
G5E8E1	LRRFIP1	Leucine rich repeat (In FLII) interacting protein 1, isoform CRA_e OS=Mus musculus GN=Lrrfip1 PE=1 SV=1	4	8	0	2	0	0	62.5	90	50	37.5	10	50	0.104267	1.66667	9	1	3.88889	1.95936	0.981852
Q80YR4	ZNF598	Zinc finger protein 598 OS=Mus musculus GN=Znf598 PE=1 SV=1	7	7	4	6	0	1	53.3333	88.8889	71.4286	46.6667	11.1111	28.5714	0.0431057	1.14286	8	2.5	3.88095	1.95641	1.36547
F7BGR7	GM21992	Protein Gm21992 OS=Mus musculus GN=Gm21992 PE=1 SV=1	4	8	4	3	0	3	55.5556	90	55.5556	44.4444	10	44.4444	0.103828	1.25	9	1.25	3.83333	1.9386	0.983687
Q3TK95	EIF4E	Eukaryotic translation initiation factor 4E OS=Mus musculus GN=Eif4e PE=1 SV=1	6	8	7	7	0	4	46.6667	90	61.5385	53.3333	10	38.4615	0.148379	0.875	9	1.6	3.825	1.93546	0.828629
Q9CQ19	MYL9	Myosin regulatory light polypeptide 9 OS=Mus musculus GN=Myl9 PE=1 SV=3	9	8	9	0	14	11	90.9091	37.5	45.4545	9.09091	62.5	54.5455	0.536001	10	0.6	0.833333	3.81111	1.93021	0.270834
A0A0A6YWK1	CLASP1	CLIP-associating protein 1 (Fragment) OS=Mus musculus GN=Clasp1 PE=1 SV=1	5	6	3	0	4	0	85.7143	58.3333	80	14.2857	41.6667	20	0.0138541	6	1.4	4	3.8	1.926	1.85842
Q60715	P4HA1	Prolyl 4-hydroxylase subunit alpha-1 OS=Mus musculus GN=P4ha1 PE=1 SV=2	5	8	0	4	0	0	54.5455	90	50	45.4545	10	50	0.172095	1.2	9	1	3.73333	1.90046	0.764233
Q8CGC6	RBM28	RNA-binding protein 28 OS=Mus musculus GN=Rbm28 PE=1 SV=4	7	7	1	6	0	0	53.3333	88.8889	66.6667	46.6667	11.1111	33.3333	0.0554066	1.14286	8	2	3.71429	1.89308	1.25644
O88322	NID2	Nidogen-2 OS=Mus musculus GN=Nid2 PE=1 SV=2	9	8	4	6	0	6	58.8235	90	41.6667	41.1765	10	58.3333	0.248581	1.42857	9	0.714286	3.71429	1.89308	0.604532
Q9QWT9	KIFC1	Kinesin-like protein KIFC1 OS=Mus musculus GN=Kifc1 PE=1 SV=2	8	7	11	0	8	9	90	47.0588	54.5455	10	52.9412	45.4545	0.212745	9	0.888889	1.2	3.6963	1.88608	0.672141
Q8R3P2	DTX2	Probable E3 ubiquitin-protein ligase DTX2 OS=Mus musculus GN=Dtx2 PE=1 SV=2	10	8	5	8	0	6	55	90	46.1538	45	10	53.8462	0.220874	1.22222	9	0.857143	3.69312	1.88484	0.655856
A0A0G2JFF1	PPP1CC	Serine/threonine-protein phosphatase (Fragment) OS=Mus musculus GN=Ppp1cc PE=1 SV=1	0	9	12	7	0	13	11.1111	90.9091	48.1481	88.8889	9.09091	51.8519	0.997418	0.125	10	0.928571	3.68452	1.88148	0.00112264
B2RX66	TAOK1	MCG124812 OS=Mus musculus GN=Taok1 PE=1 SV=1	7	13	17	0	9	10	88.8889	58.3333	62.069	11.1111	41.6667	37.931	0.0439214	8	1.4	1.63636	3.67879	1.87923	1.35732
P05132	PRKACA	cAMP-dependent protein kinase catalytic subunit alpha OS=Mus musculus GN=Prkaca PE=1 SV=3	2	3	3	0	0	0	75	80	80	25	20	20	1.77543e-05	3	4	4	3.66667	1.87447	4.7507
Q9Z2C6	UPK1B	Uroplakin-1b OS=Mus musculus GN=Upk1b PE=2 SV=3	2	4	2	0	0	0	75	83.3333	75	25	16.6667	25	0.000145128	3	5	3	3.66667	1.87447	3.83825
O54781	SRPK2	SRSF protein kinase 2 OS=Mus musculus GN=Srpk2 PE=1 SV=2	3	4	4	3	0	0	50	83.3333	83.3333	50	16.6667	16.6667	0.0474207	1	5	5	3.66667	1.87447	1.32403
A0A087WRZ7	MYL1	Myosin light chain 1/3, skeletal muscle isoform OS=Mus musculus GN=Myl1 PE=1 SV=1	0	4	4	0	0	0	50	83.3333	83.3333	50	16.6667	16.6667	0.0474207	1	5	5	3.66667	1.87447	1.32403
A0A0B4J1E3	IGHMBP2	DNA-binding protein SMUBP-2 OS=Mus musculus GN=Ighmbp2 PE=1 SV=1	0	4	4	0	0	0	50	83.3333	83.3333	50	16.6667	16.6667	0.0474207	1	5	5	3.66667	1.87447	1.32403
P58468	FAM207A	Protein FAM207A OS=Mus musculus GN=Fam207a PE=1 SV=1	0	4	4	0	0	0	50	83.3333	83.3333	50	16.6667	16.6667	0.0474207	1	5	5	3.66667	1.87447	1.32403
A2A517	CYTH1	Cytohesin-1 (Fragment) OS=Mus musculus GN=Cyth1 PE=1 SV=1	4	4	0	0	0	0	83.3333	83.3333	50	16.6667	16.6667	50	0.0474207	5	5	1	3.66667	1.87447	1.32403
Q9JLQ0	CD2AP	CD2-associated protein OS=Mus musculus GN=Cd2ap PE=1 SV=3	0	3	5	0	0	0	50	80	85.7143	50	20	14.2857	0.048967	1	4	6	3.66667	1.87447	1.3101
Q9JHU9	ISYNA1	Inositol-3-phosphate synthase 1 OS=Mus musculus GN=Isyna1 PE=1 SV=1	0	6	2	0	0	0	50	87.5	75	50	12.5	25	0.0556545	1	7	3	3.66667	1.87447	1.2545
G3UWS4	PPP2R1B	Serine/threonine-protein phosphatase 2A 65 kDa regulatory subunit A beta isoform OS=Mus musculus GN=Ppp2r1b PE=1 SV=1	1	0	7	0	0	0	66.6667	50	88.8889	33.3333	50	11.1111	0.0806972	2	1	8	3.66667	1.87447	1.09314
Q68FG2	SPTBN2	Protein Sptbn2 OS=Mus musculus GN=Sptbn2 PE=1 SV=1	1	0	7	0	0	0	66.6667	50	88.8889	33.3333	50	11.1111	0.0806972	2	1	8	3.66667	1.87447	1.09314
Q99JX7	NXF1	Nuclear RNA export factor 1 OS=Mus musculus GN=Nxf1 PE=1 SV=3	6	7	5	4	0	3	58.3333	88.8889	60	41.6667	11.1111	40	0.053015	1.4	8	1.5	3.63333	1.86129	1.2756
Q5EBQ6	RPL9	60S ribosomal protein L9 OS=Mus musculus GN=Rpl9 PE=1 SV=1	8	17	14	0	18	15	90	48.6486	48.3871	10	51.3514	51.6129	0.275322	9	0.947368	0.9375	3.62829	1.85929	0.560159
H3BKR2	GNB1	Guanine nucleotide-binding protein G(I)/G(S)/G(T) subunit beta-1 (Fragment) OS=Mus musculus GN=Gnb1 PE=1 SV=6	6	0	8	3	11	0	63.6364	7.69231	90	36.3636	92.3077	10	0.836589	1.75	0.0833333	9	3.61111	1.85244	0.077488
Q9JLQ2	GIT2	ARF GTPase-activating protein GIT2 OS=Mus musculus GN=Git2 PE=1 SV=2	0	8	7	0	0	9	50	90	44.4444	50	10	55.5556	0.321052	1	9	0.8	3.6	1.848	0.493424
P63330	PPP2CA	Serine/threonine-protein phosphatase 2A catalytic subunit alpha isoform OS=Mus musculus GN=Ppp2ca PE=1 SV=1	0	9	4	5	0	7	14.2857	90.9091	38.4615	85.7143	9.09091	61.5385	0.901188	0.166667	10	0.625	3.59722	1.84688	0.0451846
A2ADH1	MAGT1	Magnesium transporter protein 1 OS=Mus musculus GN=Magt1 PE=1 SV=1	0	7	4	0	0	2	50	88.8889	62.5	50	11.1111	37.5	0.102096	1	8	1.66667	3.55556	1.83007	0.990992
P61164	ACTR1A	Alpha-centractin OS=Mus musculus GN=Actr1a PE=1 SV=1	1	6	5	0	0	3	66.6667	87.5	60	33.3333	12.5	40	0.0217292	2	7	1.5	3.5	1.80735	1.66296
P42208	37500	Septin-2 OS=Mus musculus GN=Sept2 PE=1 SV=2	8	11	21	0	18	26	90	38.7097	44.898	10	61.2903	55.102	0.529006	9	0.631579	0.814815	3.48213	1.79997	0.27654
Q8BYL4	YARS2	Tyrosine--tRNA ligase, mitochondrial OS=Mus musculus GN=Yars2 PE=1 SV=2	0	7	6	0	0	4	50	88.8889	58.3333	50	11.1111	41.6667	0.132807	1	8	1.4	3.46667	1.79355	0.87678
Q545V8	CSNK2A2	Casein kinase II subunit alpha~ OS=Mus musculus GN=Csnk2a2 PE=1 SV=1	5	6	5	0	2	2	85.7143	70	66.6667	14.2857	30	33.3333	0.00436786	6	2.33333	2	3.44444	1.78427	2.35973
Q9JHW4	EEFSEC	Selenocysteine-specific elongation factor OS=Mus musculus GN=Eefsec PE=1 SV=2	0	7	3	0	0	2	50	88.8889	57.1429	50	11.1111	42.8571	0.143609	1	8	1.33333	3.44444	1.78427	0.84282
D3YTQ3	HNRNPDL	Heterogeneous nuclear ribonucleoprotein D-like OS=Mus musculus GN=Hnrnpdl PE=1 SV=1	6	0	2	0	2	0	87.5	25	75	12.5	75	25	0.40694	7	0.333333	3	3.44444	1.78427	0.390469
Q8BP47	NARS	Asparagine--tRNA ligase, cytoplasmic OS=Mus musculus GN=Nars PE=1 SV=2	6	20	16	0	11	10	87.5	63.6364	60.7143	12.5	36.3636	39.2857	0.0263702	7	1.75	1.54545	3.43182	1.77897	1.57889
Q8BKC5	IPO5	Importin-5 OS=Mus musculus GN=Ipo5 PE=1 SV=3	1	5	14	0	0	6	66.6667	85.7143	68.1818	33.3333	14.2857	31.8182	0.00553558	2	6	2.14286	3.38095	1.75743	2.25684
P23242	GJA1	Gap junction alpha-1 protein OS=Mus musculus GN=Gja1 PE=1 SV=2	16	5	4	7	1	0	68	75	83.3333	32	25	16.6667	0.00125141	2.125	3	5	3.375	1.75489	2.9026
Q8CJG1	37104	Protein argonaute-1 OS=Mus musculus GN=Ago1 PE=1 SV=2	10	7	0	9	0	0	52.381	88.8889	50	47.619	11.1111	50	0.19703	1.1	8	1	3.36667	1.75132	0.705468
A0A087WPH7	PSMC3	26S protease regulatory subunit 6A (Fragment) OS=Mus musculus GN=Psmc3 PE=1 SV=4	1	2	4	0	0	0	66.6667	75	83.3333	33.3333	25	16.6667	0.00182626	2	3	5	3.33333	1.73697	2.73844
A2ATP5	MYEF2	Myelin expression factor 2 OS=Mus musculus GN=Myef2 PE=1 SV=1	3	4	0	0	0	0	80	83.3333	50	20	16.6667	50	0.0479865	4	5	1	3.33333	1.73697	1.31888
D3YVJ6	DEK	Protein DEK (Fragment) OS=Mus musculus GN=Dek PE=1 SV=1	0	3	4	0	0	0	50	80	83.3333	50	20	16.6667	0.0479865	1	4	5	3.33333	1.73697	1.31888
Q3UM33	HDAC3	Histone deacetylase OS=Mus musculus GN=Hdac3 PE=1 SV=1	0	3	4	0	0	0	50	80	83.3333	50	20	16.6667	0.0479865	1	4	5	3.33333	1.73697	1.31888
Q9QXB9	DRG2	Developmentally-regulated GTP-binding protein 2 OS=Mus musculus GN=Drg2 PE=1 SV=1	0	4	3	0	0	0	50	83.3333	80	50	16.6667	20	0.0479865	1	5	4	3.33333	1.73697	1.31888
Q5NC82	NME2	Nucleoside diphosphate kinase OS=Mus musculus GN=Nme2 PE=1 SV=1	0	4	3	0	0	0	50	83.3333	80	50	16.6667	20	0.0479865	1	5	4	3.33333	1.73697	1.31888
D3YX34	DCTN1	Dynactin subunit 1 OS=Mus musculus GN=Dctn1 PE=1 SV=1	0	4	3	0	0	0	50	83.3333	80	50	16.6667	20	0.0479865	1	5	4	3.33333	1.73697	1.31888
Q6NXH9	KRT73	Keratin, type II cytoskeletal 73 OS=Mus musculus GN=Krt73 PE=1 SV=1	5	4	3	5	0	0	50	83.3333	80	50	16.6667	20	0.0479865	1	5	4	3.33333	1.73697	1.31888
E9PUR0	ANKHD1	Protein Ankhd1 OS=Mus musculus GN=Ankhd1 PE=1 SV=1	7	3	4	7	0	0	50	80	83.3333	50	20	16.6667	0.0479865	1	4	5	3.33333	1.73697	1.31888
Q62181	SEMA3C	Semaphorin-3C OS=Mus musculus GN=Sema3c PE=1 SV=2	0	5	2	0	0	0	50	85.7143	75	50	14.2857	25	0.0538208	1	6	3	3.33333	1.73697	1.26905
Q3UMY5	EML4	Echinoderm microtubule-associated protein-like 4 OS=Mus musculus GN=Eml4 PE=1 SV=1	0	5	2	0	0	0	50	85.7143	75	50	14.2857	25	0.0538208	1	6	3	3.33333	1.73697	1.26905
Q9QYB5	ADD3	Gamma-adducin OS=Mus musculus GN=Add3 PE=1 SV=2	6	6	5	6	0	2	50	87.5	66.6667	50	12.5	33.3333	0.0781791	1	7	2	3.33333	1.73697	1.10691
Q8VHM5	HNRNPR	Heterogeneous nuclear ribonucleoprotein R OS=Mus musculus GN=Hnrnpr PE=1 SV=1	8	7	0	8	0	0	50	88.8889	50	50	11.1111	50	0.2302	1	8	1	3.33333	1.73697	0.637895
Q8VHE0	SEC63	Translocation protein SEC63 homolog OS=Mus musculus GN=Sec63 PE=1 SV=4	0	7	5	1	0	3	33.3333	88.8889	60	66.6667	11.1111	40	0.397315	0.5	8	1.5	3.33333	1.73697	0.400865
B1AQ78	KRT19	Keratin 19 OS=Mus musculus GN=Krt19 PE=1 SV=1	5	7	6	4	0	8	54.5455	88.8889	43.75	45.4545	11.1111	56.25	0.267186	1.2	8	0.777778	3.32593	1.73376	0.573186
P70288	HDAC2	Histone deacetylase 2 OS=Mus musculus GN=Hdac2 PE=1 SV=1	5	6	3	3	0	2	60	87.5	57.1429	40	12.5	42.8571	0.0562979	1.5	7	1.33333	3.27778	1.71272	1.24951
F6YJC6	PGAM5	Serine/threonine-protein phosphatase PGAM5, mitochondrial (Fragment) OS=Mus musculus GN=Pgam5 PE=1 SV=1	4	7	0	5	0	0	45.4545	88.8889	50	54.5455	11.1111	50	0.305308	0.833333	8	1	3.27778	1.71272	0.515261
Q9DCV7	KRT7	Keratin, type II cytoskeletal 7 OS=Mus musculus GN=Krt7 PE=1 SV=1	8	4	4	3	0	1	69.2308	83.3333	71.4286	30.7692	16.6667	28.5714	0.00134793	2.25	5	2.5	3.25	1.70044	2.87033
E0CXB9	CTNNA2	Catenin alpha-2 OS=Mus musculus GN=Ctnna2 PE=1 SV=1	4	2	6	0	0	3	83.3333	75	63.6364	16.6667	25	36.3636	0.0040199	5	3	1.75	3.25	1.70044	2.39578
Q3TTW5	PUM1	Pumilio homolog 1 OS=Mus musculus GN=Pum1 PE=1 SV=1	3	4	2	0	0	3	80	83.3333	42.8571	20	16.6667	57.1429	0.1107	4	5	0.75	3.25	1.70044	0.955851
Q91V89	PPP2R5D	Protein Ppp2r5d OS=Mus musculus GN=Ppp2r5d PE=1 SV=1	2	5	4	0	0	6	75	85.7143	41.6667	25	14.2857	58.3333	0.136111	3	6	0.714286	3.2381	1.69515	0.866107
O35382	EXOC4	Exocyst complex component 4 OS=Mus musculus GN=Exoc4 PE=1 SV=2	1	7	6	3	0	5	33.3333	88.8889	53.8462	66.6667	11.1111	46.1538	0.490837	0.5	8	1.16667	3.22222	1.68806	0.309063
Q9D0D4	DIMT1	Probable dimethyladenosine transferase OS=Mus musculus GN=Dimt1 PE=2 SV=1	5	7	3	0	4	1	85.7143	61.5385	66.6667	14.2857	38.4615	33.3333	0.0148883	6	1.6	2	3.2	1.67807	1.82716
A2AIM4	TPM2	Tropomyosin beta chain OS=Mus musculus GN=Tpm2 PE=1 SV=1	8	0	7	0	17	14	90	5.26316	34.7826	10	94.7368	65.2174	0.724097	9	0.0555556	0.533333	3.1963	1.6764	0.140203
Q6PAJ1	BCR	Breakpoint cluster region protein OS=Mus musculus GN=Bcr PE=1 SV=3	0	6	13	0	0	8	50	87.5	60.8696	50	12.5	39.1304	0.110074	1	7	1.55556	3.18519	1.67138	0.958315
P97377	CDK2	Cyclin-dependent kinase 2 OS=Mus musculus GN=Cdk2 PE=1 SV=2	5	12	11	0	5	8	85.7143	68.4211	57.1429	14.2857	31.5789	42.8571	0.0254269	6	2.16667	1.33333	3.16667	1.66297	1.59471
F6Q5Z1	ILK	Integrin-linked protein kinase (Fragment) OS=Mus musculus GN=Ilk PE=1 SV=1	0	6	5	0	0	3	50	87.5	60	50	12.5	40	0.116484	1	7	1.5	3.16667	1.66297	0.933735
Q5SVQ0	KAT7	Histone acetyltransferase KAT7 OS=Mus musculus GN=Kat7 PE=1 SV=1	0	3	4	1	0	0	33.3333	80	83.3333	66.6667	20	16.6667	0.24456	0.5	4	5	3.16667	1.66297	0.611614
Q3TMX0	SDCBP	MCG4375, isoform CRA_b OS=Mus musculus GN=Sdcbp PE=1 SV=1	9	4	5	6	0	1	58.8235	83.3333	75	41.1765	16.6667	25	0.0116917	1.42857	5	3	3.14286	1.65208	1.93212
Q8BVY0	RSL1D1	Ribosomal L1 domain-containing protein 1 OS=Mus musculus GN=Rsl1d1 PE=1 SV=1	6	5	10	0	6	6	87.5	46.1538	61.1111	12.5	53.8462	38.8889	0.155757	7	0.857143	1.57143	3.14286	1.65208	0.807551
Q4KML7	EZR	Ezrin OS=Mus musculus GN=Ezr PE=1 SV=1	25	26	18	14	6	4	63.4146	79.4118	79.1667	36.5854	20.5882	20.8333	0.00303795	1.73333	3.85714	3.8	3.13016	1.64624	2.51742
Q80XU2	SRC	Tyrosine-protein kinase OS=Mus musculus GN=Src PE=1 SV=1	3	0	6	2	0	0	57.1429	50	87.5	42.8571	50	12.5	0.141124	1.33333	1	7	3.11111	1.63743	0.850398
Q9D2N4	DTNA	Dystrobrevin alpha OS=Mus musculus GN=Dtna PE=1 SV=2	4	0	3	0	2	0	83.3333	25	80	16.6667	75	20	0.393463	5	0.333333	4	3.11111	1.63743	0.405097
Q3TQ29	PUM2	Pumilio homolog 2 OS=Mus musculus GN=Pum2 PE=1 SV=1	7	6	4	4	0	6	61.5385	87.5	41.6667	38.4615	12.5	58.3333	0.2217	1.6	7	0.714286	3.10476	1.63448	0.654233
Q6ZPF4	FMNL3	Formin-like protein 3 OS=Mus musculus GN=Fmnl3 PE=1 SV=2	6	10	11	0	9	9	87.5	52.381	54.5455	12.5	47.619	45.4545	0.139097	7	1.1	1.2	3.1	1.63227	0.856683
E9QN31	NOP2	Probable 28S rRNA (cytosine-C(5))-methyltransferase OS=Mus musculus GN=Nop2 PE=1 SV=1	4	6	5	0	1	7	83.3333	77.7778	42.8571	16.6667	22.2222	57.1429	0.115026	5	3.5	0.75	3.08333	1.62449	0.939205
Q9DC23	DNAJC10	DnaJ homolog subfamily C member 10 OS=Mus musculus GN=Dnajc10 PE=1 SV=2	5	8	6	7	5	0	42.8571	60	87.5	57.1429	40	12.5	0.217257	0.75	1.5	7	3.08333	1.62449	0.663027
Q3UKJ7	SMU1	WD40 repeat-containing protein SMU1 OS=Mus musculus GN=Smu1 PE=2 SV=2	10	2	3	4	0	0	68.75	75	80	31.25	25	20	0.000434902	2.2	3	4	3.06667	1.61667	3.36161
Q8CGC4	LSM14B	Protein LSM14 homolog B OS=Mus musculus GN=Lsm14b PE=1 SV=3	3	3	5	0	0	4	80	80	54.5455	20	20	45.4545	0.023043	4	4	1.2	3.06667	1.61667	1.63746
D3YYI8	GM10093	Histone deacetylase OS=Mus musculus GN=Gm10093 PE=3 SV=1	6	7	4	4	2	0	58.3333	72.7273	83.3333	41.6667	27.2727	16.6667	0.0138044	1.4	2.66667	5	3.02222	1.59561	1.85998
Q8C156	NCAPH	Condensin complex subunit 2 OS=Mus musculus GN=Ncaph PE=1 SV=1	2	1	3	0	0	0	75	66.6667	80	25	33.3333	20	0.000966468	3	2	4	3	1.58496	3.01481
A0A0J9YTV5	RBPJ	Recombining binding protein suppressor of hairless (Drosophila), isoform CRA_b OS=Mus musculus GN=Rbpj PE=1 SV=1	4	3	1	0	1	0	83.3333	66.6667	66.6667	16.6667	33.3333	33.3333	0.00481268	5	2	2	3	1.58496	2.31761
Q8C0V0	TLK1	Serine/threonine-protein kinase tousled-like 1 OS=Mus musculus GN=Tlk1 PE=1 SV=2	0	3	3	0	0	0	50	80	80	50	20	20	0.0474207	1	4	4	3	1.58496	1.32403
Q922H4	GMPPA	Mannose-1-phosphate guanyltransferase alpha OS=Mus musculus GN=Gmppa PE=1 SV=1	0	3	3	0	0	0	50	80	80	50	20	20	0.0474207	1	4	4	3	1.58496	1.32403
Q9DC69	NDUFA9	NADH dehydrogenase [ubiquinone] 1 alpha subcomplex subunit 9, mitochondrial OS=Mus musculus GN=Ndufa9 PE=1 SV=2	0	3	3	0	0	0	50	80	80	50	20	20	0.0474207	1	4	4	3	1.58496	1.32403
Q3U6N9	MUS MUSCULUS	UPF0488 protein C8orf33 homolog OS=Mus musculus PE=2 SV=1	2	4	2	2	0	0	50	83.3333	75	50	16.6667	25	0.051606	1	5	3	3	1.58496	1.2873
Q8VCX5	MICU1	Calcium uptake protein 1, mitochondrial OS=Mus musculus GN=Micu1 PE=1 SV=1	4	0	2	0	0	0	83.3333	50	75	16.6667	50	25	0.051606	5	1	3	3	1.58496	1.2873
D3YYN8	CDC42BPA	Non-specific serine/threonine protein kinase OS=Mus musculus GN=Cdc42bpa PE=1 SV=1	2	0	4	0	0	0	75	50	83.3333	25	50	16.6667	0.051606	3	1	5	3	1.58496	1.2873
E9PWF0	THBS3	Thrombospondin-3 OS=Mus musculus GN=Thbs3 PE=1 SV=1	4	2	0	0	0	0	83.3333	75	50	16.6667	25	50	0.051606	5	3	1	3	1.58496	1.2873
P31324	PRKAR2B	cAMP-dependent protein kinase type II-beta regulatory subunit OS=Mus musculus GN=Prkar2b PE=1 SV=3	2	4	0	0	0	0	75	83.3333	50	25	16.6667	50	0.051606	3	5	1	3	1.58496	1.2873
Q3TSG4	ALKBH5	RNA demethylase ALKBH5 OS=Mus musculus GN=Alkbh5 PE=1 SV=2	0	4	2	0	0	0	50	83.3333	75	50	16.6667	25	0.051606	1	5	3	3	1.58496	1.2873
Q9D8U0	IFRD2	Interferon-related developmental regulator 2 OS=Mus musculus GN=Ifrd2 PE=1 SV=1	0	4	2	0	0	0	50	83.3333	75	50	16.6667	25	0.051606	1	5	3	3	1.58496	1.2873
Q9D1Q6	ERP44	Endoplasmic reticulum resident protein 44 OS=Mus musculus GN=Erp44 PE=1 SV=1	0	4	5	0	0	1	50	83.3333	75	50	16.6667	25	0.051606	1	5	3	3	1.58496	1.2873
P39688	FYN	Tyrosine-protein kinase Fyn OS=Mus musculus GN=Fyn PE=1 SV=4	3	0	6	3	0	0	50	50	87.5	50	50	12.5	0.2302	1	1	7	3	1.58496	0.637895
Q8JZM7	CDC73	Parafibromin OS=Mus musculus GN=Cdc73 PE=1 SV=1	0	6	3	0	0	3	50	87.5	50	50	12.5	50	0.2302	1	7	1	3	1.58496	0.637895
Q80U72	SCRIB	Protein scribble homolog OS=Mus musculus GN=Scrib PE=1 SV=2	4	0	6	4	0	0	50	50	87.5	50	50	12.5	0.2302	1	1	7	3	1.58496	0.637895
Q61127	NAB2	NGFI-A-binding protein 2 OS=Mus musculus GN=Nab2 PE=1 SV=2	6	8	11	0	8	11	87.5	50	50	12.5	50	50	0.2302	7	1	1	3	1.58496	0.637895
G3UZ44	PRRX1	Paired mesoderm homeobox protein 1 OS=Mus musculus GN=Prrx1 PE=1 SV=1	6	6	2	0	4	5	87.5	58.3333	33.3333	12.5	41.6667	66.6667	0.429307	7	1.4	0.5	2.96667	1.56884	0.367232
Q9R1X4	TIMELESS	Protein timeless homolog OS=Mus musculus GN=Timeless PE=1 SV=3	6	6	4	0	4	10	87.5	58.3333	31.25	12.5	41.6667	68.75	0.475776	7	1.4	0.454545	2.95152	1.56146	0.322597
P97473	TARBP2	RISC-loading complex subunit TARBP2 OS=Mus musculus GN=Tarbp2 PE=1 SV=2	2	4	3	0	0	4	75	83.3333	44.4444	25	16.6667	55.5556	0.103114	3	5	0.8	2.93333	1.55254	0.986684
Q8CG46	SMC5	Structural maintenance of chromosomes protein 5 OS=Mus musculus GN=Smc5 PE=1 SV=1	6	2	3	3	0	0	63.6364	75	80	36.3636	25	20	0.00260639	1.75	3	4	2.91667	1.54432	2.58396
F8WJE0	SAMHD1	Deoxynucleoside triphosphate triphosphohydrolase SAMHD1 OS=Mus musculus GN=Samhd1 PE=1 SV=1	0	4	6	0	6	0	50	41.6667	87.5	50	58.3333	12.5	0.384581	1	0.714286	7	2.90476	1.53842	0.415012
Q91VN6	DDX41	Probable ATP-dependent RNA helicase DDX41 OS=Mus musculus GN=Ddx41 PE=1 SV=2	4	5	4	0	4	1	83.3333	54.5455	71.4286	16.6667	45.4545	28.5714	0.0286335	5	1.2	2.5	2.9	1.53605	1.54313
F6YD01	PUM2	Pumilio homolog 2 (Fragment) OS=Mus musculus GN=Pum2 PE=1 SV=1	4	3	2	2	0	0	62.5	80	75	37.5	20	25	0.0036227	1.66667	4	3	2.88889	1.53051	2.44097
Q8K2Y9	CCM2	Cerebral cavernous malformations protein 2 homolog OS=Mus musculus GN=Ccm2 PE=1 SV=1	2	3	4	0	0	2	75	80	62.5	25	20	37.5	0.0036227	3	4	1.66667	2.88889	1.53051	2.44097
Q3UMG6	NME7	Non-metastatic cells 7, protein expressed in, isoform CRA_c OS=Mus musculus GN=Nme7 PE=1 SV=1	7	5	3	5	0	2	57.1429	85.7143	57.1429	42.8571	14.2857	42.8571	0.0685871	1.33333	6	1.33333	2.88889	1.53051	1.16376
F8WI35	H3F3A	Histone H3 OS=Mus musculus GN=H3f3a PE=3 SV=1	6	4	4	0	5	5	87.5	45.4545	45.4545	12.5	54.5455	54.5455	0.393411	7	0.833333	0.833333	2.88889	1.53051	0.405153
Q91ZW3	SMARCA5	SWI/SNF-related matrix-associated actin-dependent regulator of chromatin subfamily A member 5 OS=Mus musculus GN=Smarca5 PE=1 SV=1	13	3	5	8	0	1	60.8696	80	75	39.1304	20	25	0.00561454	1.55556	4	3	2.85185	1.5119	2.25069
Q924W5	SMC6	Structural maintenance of chromosomes protein 6 OS=Mus musculus GN=Smc6 PE=1 SV=1	4	4	3	1	0	3	71.4286	83.3333	50	28.5714	16.6667	50	0.0571605	2.5	5	1	2.83333	1.5025	1.2429
G3UY65	CCNB1	G2/mitotic-specific cyclin-B1 OS=Mus musculus GN=Ccnb1 PE=1 SV=1	0	4	4	0	0	1	50	83.3333	71.4286	50	16.6667	28.5714	0.0571605	1	5	2.5	2.83333	1.5025	1.2429
A0A0A6YX73	PRKAR2A	cAMP-dependent protein kinase type II-alpha regulatory subunit OS=Mus musculus GN=Prkar2a PE=1 SV=1	0	5	2	0	0	1	50	85.7143	60	50	14.2857	40	0.11274	1	6	1.5	2.83333	1.5025	0.947923
Q80X85	MRPS7	28S ribosomal protein S7, mitochondrial OS=Mus musculus GN=Mrps7 PE=1 SV=1	0	4	2	1	0	0	33.3333	83.3333	75	66.6667	16.6667	25	0.272935	0.5	5	3	2.83333	1.5025	0.56394
Q6ZQ08	CNOT1	CCR4-NOT transcription complex subunit 1 OS=Mus musculus GN=Cnot1 PE=1 SV=2	17	4	9	19	0	3	47.3684	83.3333	71.4286	52.6316	16.6667	28.5714	0.080855	0.9	5	2.5	2.8	1.48543	1.09229
A0A0A0MQ76	NOP58	Nucleolar protein 58 OS=Mus musculus GN=Nop58 PE=1 SV=1	5	5	5	4	4	0	54.5455	54.5455	85.7143	45.4545	45.4545	14.2857	0.111839	1.2	1.2	6	2.8	1.48543	0.951407
Q7TT50	CDC42BPB	Serine/threonine-protein kinase MRCK beta OS=Mus musculus GN=Cdc42bpb PE=1 SV=2	15	2	6	15	7	0	50	27.2727	87.5	50	72.7273	12.5	0.711919	1	0.375	7	2.79167	1.48113	0.14757
Q78HU3	MVB12A	Multivesicular body subunit 12A OS=Mus musculus GN=Mvb12a PE=1 SV=1	3	3	2	2	0	0	57.1429	80	75	42.8571	20	25	0.0134495	1.33333	4	3	2.77778	1.47393	1.87129
A0A0A6YVV8	MBNL1	Muscleblind-like protein 1 OS=Mus musculus GN=Mbnl1 PE=1 SV=1	3	4	1	2	0	0	57.1429	83.3333	66.6667	42.8571	16.6667	33.3333	0.0244604	1.33333	5	2	2.77778	1.47393	1.61154
F6RJV6	LANCL2	LanC-like protein 2 (Fragment) OS=Mus musculus GN=Lancl2 PE=1 SV=1	4	3	2	3	0	0	55.5556	80	75	44.4444	20	25	0.018639	1.25	4	3	2.75	1.45943	1.72958
Q9JMK2	CSNK1E	Casein kinase I isoform epsilon OS=Mus musculus GN=Csnk1e PE=1 SV=2	0	5	4	0	0	3	50	85.7143	55.5556	50	14.2857	44.4444	0.154399	1	6	1.25	2.75	1.45943	0.811356
G3X914	CUL5	Cullin 5 OS=Mus musculus GN=Cul5 PE=1 SV=1	0	5	4	0	0	3	50	85.7143	55.5556	50	14.2857	44.4444	0.154399	1	6	1.25	2.75	1.45943	0.811356
Q9R0Q4 & A2AEB3	MORF4L2	Mortality factor 4-like protein 2 OS=Mus musculus GN=Morf4l2 PE=1 SV=1	4	5	4	0	3	2	83.3333	60	62.5	16.6667	40	37.5	0.0236178	5	1.5	1.66667	2.72222	1.44478	1.62676
Q3TRJ7	SH3GL1	Endophilin-A2 OS=Mus musculus GN=Sh3gl1 PE=1 SV=1	5	6	11	0	8	8	85.7143	43.75	57.1429	14.2857	56.25	42.8571	0.235643	6	0.777778	1.33333	2.7037	1.43494	0.627745
F8VPK0	TTC37	Protein Ttc37 OS=Mus musculus GN=Ttc37 PE=1 SV=1	4	10	9	0	5	7	83.3333	64.7059	55.5556	16.6667	35.2941	44.4444	0.0365277	5	1.83333	1.25	2.69444	1.42999	1.43738
B1AZ14	COBLL1	Cordon-bleu protein-like 1 OS=Mus musculus GN=Cobll1 PE=1 SV=1	4	6	4	2	4	0	62.5	58.3333	83.3333	37.5	41.6667	16.6667	0.0298773	1.66667	1.4	5	2.68889	1.42701	1.52466
Q8VDW0	DDX39A	ATP-dependent RNA helicase DDX39A OS=Mus musculus GN=Ddx39a PE=1 SV=1	2	2	1	0	0	0	75	75	66.6667	25	25	33.3333	0.000347891	3	3	2	2.66667	1.41504	3.45856
Q9Z1N5	DDX39B	Spliceosome RNA helicase Ddx39b OS=Mus musculus GN=Ddx39b PE=1 SV=1	2	2	3	0	0	1	75	75	66.6667	25	25	33.3333	0.000347891	3	3	2	2.66667	1.41504	3.45856
D3YYD2	FAM111A	Protein FAM111A OS=Mus musculus GN=Fam111a PE=1 SV=1	2	2	3	0	0	1	75	75	66.6667	25	25	33.3333	0.000347891	3	3	2	2.66667	1.41504	3.45856
Q99ME9	GTPBP4	Nucleolar GTP-binding protein 1 OS=Mus musculus GN=Gtpbp4 PE=1 SV=3	3	3	1	1	0	0	66.6667	80	66.6667	33.3333	20	33.3333	0.00255701	2	4	2	2.66667	1.41504	2.59227
A6PWY4	WDR76	WD repeat-containing protein 76 OS=Mus musculus GN=Wdr76 PE=1 SV=1	3	1	1	0	0	0	80	66.6667	66.6667	20	33.3333	33.3333	0.00255701	4	2	2	2.66667	1.41504	2.59227
Q9DC28	CSNK1D	Casein kinase I isoform delta OS=Mus musculus GN=Csnk1d PE=1 SV=2	5	4	5	3	0	3	60	83.3333	60	40	16.6667	40	0.0319002	1.5	5	1.5	2.66667	1.41504	1.49621
O35671	ITGB1BP1	Integrin beta-1-binding protein 1 OS=Mus musculus GN=Itgb1bp1 PE=1 SV=1	0	3	2	0	0	0	50	80	75	50	20	25	0.049111	1	4	3	2.66667	1.41504	1.30882
Q3TFK5	GPATCH4	G patch domain-containing protein 4 OS=Mus musculus GN=Gpatch4 PE=1 SV=1	0	3	2	0	0	0	50	80	75	50	20	25	0.049111	1	4	3	2.66667	1.41504	1.30882
A3KGG8	KNSTRN	Small kinetochore-associated protein OS=Mus musculus GN=Knstrn PE=1 SV=1	0	3	2	0	0	0	50	80	75	50	20	25	0.049111	1	4	3	2.66667	1.41504	1.30882
P63005	PAFAH1B1	Platelet-activating factor acetylhydrolase IB subunit alpha OS=Mus musculus GN=Pafah1b1 PE=1 SV=2	0	3	2	0	0	0	50	80	75	50	20	25	0.049111	1	4	3	2.66667	1.41504	1.30882
Q8CI33	CWF19L1	CWF19-like protein 1 OS=Mus musculus GN=Cwf19l1 PE=1 SV=2	0	3	2	0	0	0	50	80	75	50	20	25	0.049111	1	4	3	2.66667	1.41504	1.30882
P28271	ACO1	Cytoplasmic aconitate hydratase OS=Mus musculus GN=Aco1 PE=1 SV=3	0	3	2	0	0	0	50	80	75	50	20	25	0.049111	1	4	3	2.66667	1.41504	1.30882
Q3UG16	AP1M1	AP-1 complex subunit mu-1 OS=Mus musculus GN=Ap1m1 PE=1 SV=1	0	3	2	0	0	0	50	80	75	50	20	25	0.049111	1	4	3	2.66667	1.41504	1.30882
E9Q7L0	OGDHL	Protein Ogdhl OS=Mus musculus GN=Ogdhl PE=1 SV=1	2	0	3	0	0	0	75	50	80	25	50	20	0.049111	3	1	4	2.66667	1.41504	1.30882
Q3TTV6	TFIP11	Tuftelin-interacting protein 11 OS=Mus musculus GN=Tfip11 PE=1 SV=1	3	2	0	0	0	0	80	75	50	20	25	50	0.049111	4	3	1	2.66667	1.41504	1.30882
A0A087WPP8	ABI2	Abl interactor 2 OS=Mus musculus GN=Abi2 PE=1 SV=1	0	2	3	0	0	0	50	75	80	50	25	20	0.049111	1	3	4	2.66667	1.41504	1.30882
Q9EP69	SACM1L	Phosphatidylinositide phosphatase SAC1 OS=Mus musculus GN=Sacm1l PE=1 SV=1	0	2	3	0	0	0	50	75	80	50	25	20	0.049111	1	3	4	2.66667	1.41504	1.30882
Q9ES70	NEK6	Serine/threonine-protein kinase Nek6 OS=Mus musculus GN=Nek6 PE=1 SV=1	0	2	3	0	0	0	50	75	80	50	25	20	0.049111	1	3	4	2.66667	1.41504	1.30882
Q8C6B9	RPS19BP1	Active regulator of SIRT1 OS=Mus musculus GN=Rps19bp1 PE=1 SV=1	0	2	3	0	0	0	50	75	80	50	25	20	0.049111	1	3	4	2.66667	1.41504	1.30882
Q80TF6	STARD9	StAR-related lipid transfer protein 9 OS=Mus musculus GN=Stard9 PE=1 SV=2	0	2	3	0	0	0	50	75	80	50	25	20	0.049111	1	3	4	2.66667	1.41504	1.30882
Q9D6T0	NOSIP	Nitric oxide synthase-interacting protein OS=Mus musculus GN=Nosip PE=1 SV=1	0	2	3	0	0	0	50	75	80	50	25	20	0.049111	1	3	4	2.66667	1.41504	1.30882
B8JK87	AMOTL2	Angiomotin-like protein 2 OS=Mus musculus GN=Amotl2 PE=1 SV=1	2	3	0	0	0	0	75	80	50	25	20	50	0.049111	3	4	1	2.66667	1.41504	1.30882
Q1HFZ0	NSUN2	tRNA (cytosine(34)-C(5))-methyltransferase OS=Mus musculus GN=Nsun2 PE=1 SV=2	2	3	0	0	0	0	75	80	50	25	20	50	0.049111	3	4	1	2.66667	1.41504	1.30882
Q8BGT7	SMNDC1	Survival of motor neuron-related-splicing factor 30 OS=Mus musculus GN=Smndc1 PE=1 SV=1	2	3	3	0	3	0	75	50	80	25	50	20	0.049111	3	1	4	2.66667	1.41504	1.30882
A2AMI2	EIF4G3	Eukaryotic translation initiation factor 4 gamma 3 OS=Mus musculus GN=Eif4g3 PE=1 SV=1	7	3	2	7	0	0	50	80	75	50	20	25	0.049111	1	4	3	2.66667	1.41504	1.30882
J3QPS8	EIF5A	Eukaryotic translation initiation factor 5A-1 OS=Mus musculus GN=Eif5a PE=1 SV=1	0	4	3	0	0	1	50	83.3333	66.6667	50	16.6667	33.3333	0.070484	1	5	2	2.66667	1.41504	1.15191
Q8R3L2	TCF25	Transcription factor 25 OS=Mus musculus GN=Tcf25 PE=1 SV=2	0	5	4	0	2	0	50	66.6667	83.3333	50	33.3333	16.6667	0.070484	1	2	5	2.66667	1.41504	1.15191
G3UVU6	GM20517	Protein Gm20517 OS=Mus musculus GN=Gm20517 PE=4 SV=1	4	1	0	0	0	0	83.3333	66.6667	50	16.6667	33.3333	50	0.070484	5	2	1	2.66667	1.41504	1.15191
Q3USZ8	MUS MUSCULUS	Deleted in autism protein 1 homolog OS=Mus musculus PE=1 SV=2	0	4	1	0	0	0	50	83.3333	66.6667	50	16.6667	33.3333	0.070484	1	5	2	2.66667	1.41504	1.15191
Q9JK83	PARD6B	Partitioning defective 6 homolog beta OS=Mus musculus GN=Pard6b PE=1 SV=2	0	4	1	0	0	0	50	83.3333	66.6667	50	16.6667	33.3333	0.070484	1	5	2	2.66667	1.41504	1.15191
Q8BP00	IQCB1	IQ calmodulin-binding motif-containing protein 1 OS=Mus musculus GN=Iqcb1 PE=1 SV=2	0	4	1	0	0	0	50	83.3333	66.6667	50	16.6667	33.3333	0.070484	1	5	2	2.66667	1.41504	1.15191
Q8BHX1	HAUS1	HAUS augmin-like complex subunit 1 OS=Mus musculus GN=Haus1 PE=1 SV=2	0	4	1	0	0	0	50	83.3333	66.6667	50	16.6667	33.3333	0.070484	1	5	2	2.66667	1.41504	1.15191
Q8R5L3	VPS39	Vam6/Vps39-like protein OS=Mus musculus GN=Vps39 PE=1 SV=1	0	4	1	0	0	0	50	83.3333	66.6667	50	16.6667	33.3333	0.070484	1	5	2	2.66667	1.41504	1.15191
Q9CQS9	HAUS2	HAUS augmin-like complex subunit 2 OS=Mus musculus GN=Haus2 PE=2 SV=1	0	4	1	0	0	0	50	83.3333	66.6667	50	16.6667	33.3333	0.070484	1	5	2	2.66667	1.41504	1.15191
Q8BSS9	PPFIA2	Liprin-alpha-2 OS=Mus musculus GN=Ppfia2 PE=1 SV=2	4	5	0	4	0	0	50	85.7143	50	50	14.2857	50	0.2302	1	6	1	2.66667	1.41504	0.637895
Q8K1A6	CC2D1A	Coiled-coil and C2 domain-containing protein 1A OS=Mus musculus GN=Cc2d1a PE=1 SV=2	0	5	6	0	0	6	50	85.7143	50	50	14.2857	50	0.2302	1	6	1	2.66667	1.41504	0.637895
Q91VM5	RBMXL1	RNA binding motif protein, X-linked-like-1 OS=Mus musculus GN=Rbmxl1 PE=2 SV=1	7	0	5	7	0	0	50	50	85.7143	50	50	14.2857	0.2302	1	1	6	2.66667	1.41504	0.637895
H7BWY2	AP3M1	AP-3 complex subunit mu-1 OS=Mus musculus GN=Ap3m1 PE=1 SV=1	5	8	0	0	4	4	85.7143	64.2857	16.6667	14.2857	35.7143	83.3333	0.719802	6	1.8	0.2	2.66667	1.41504	0.142787
Q3UDD3	POLDIP3	Polymerase delta-interacting protein 3 OS=Mus musculus GN=Poldip3 PE=1 SV=1	6	10	0	0	11	11	87.5	47.8261	7.69231	12.5	52.1739	92.3077	0.893313	7	0.916667	0.0833333	2.66667	1.41504	0.0489966
Q6NXL3	EBF3	Ebf3 protein OS=Mus musculus GN=Ebf3 PE=1 SV=1	5	5	2	4	0	3	54.5455	85.7143	42.8571	45.4545	14.2857	57.1429	0.289294	1.2	6	0.75	2.65	1.40599	0.538661
Q3TVI5	COL3A1	Collagen alpha-1(III) chain OS=Mus musculus GN=Col3a1 PE=1 SV=1	39	14	8	33	3	2	54.0541	78.9474	75	45.9459	21.0526	25	0.0240196	1.17647	3.75	3	2.64216	1.40172	1.61943
Q99LJ7	RCBTB2	RCC1 and BTB domain-containing protein 2 OS=Mus musculus GN=Rcbtb2 PE=2 SV=1	5	0	6	0	0	7	85.7143	50	46.6667	14.2857	50	53.3333	0.288993	6	1	0.875	2.625	1.39232	0.539113
Q8BKN5	TUBGCP5	Gamma-tubulin complex component 5 OS=Mus musculus GN=Tubgcp5 PE=2 SV=2	6	5	0	7	0	0	46.6667	85.7143	50	53.3333	14.2857	50	0.288993	0.875	6	1	2.625	1.39232	0.539113
Q9Z1M8	IK	Protein Red OS=Mus musculus GN=Ik PE=1 SV=2	5	2	3	6	0	0	46.1538	75	80	53.8462	25	20	0.0842137	0.857143	3	4	2.61905	1.38904	1.07462
F6QA74	APEX1	DNA-(apurinic or apyrimidinic site) lyase (Fragment) OS=Mus musculus GN=Apex1 PE=1 SV=1	0	5	5	0	6	0	50	46.1538	85.7143	50	53.8462	14.2857	0.298874	1	0.857143	6	2.61905	1.38904	0.524512
B7ZCU0	ABI1	Abl interactor 1 OS=Mus musculus GN=Abi1 PE=1 SV=1	5	7	0	0	4	3	85.7143	61.5385	20	14.2857	38.4615	80	0.693491	6	1.6	0.25	2.61667	1.38773	0.158959
Q3U8S0	AP3S1	AP-3 complex subunit sigma-1 OS=Mus musculus GN=Ap3s1 PE=1 SV=1	3	6	7	0	5	2	80	53.8462	72.7273	20	46.1538	27.2727	0.0267368	4	1.16667	2.66667	2.61111	1.38466	1.57289
Q8CBY8	DCTN4	Dynactin subunit 4 OS=Mus musculus GN=Dctn4 PE=1 SV=1	3	9	8	0	3	6	80	71.4286	56.25	20	28.5714	43.75	0.017311	4	2.5	1.28571	2.59524	1.37587	1.76168
Q9Z0U1	TJP2	Tight junction protein ZO-2 OS=Mus musculus GN=Tjp2 PE=1 SV=2	42	43	43	17	12	21	70.4918	77.193	66.6667	29.5082	22.807	33.3333	0.000593243	2.38889	3.38462	2	2.59117	1.3736	3.22677
Q3U4H0	MAPRE1	Microtubule-associated protein RP/EB family member 1 OS=Mus musculus GN=Mapre1 PE=1 SV=1	4	4	3	3	1	0	55.5556	71.4286	80	44.4444	28.5714	20	0.0199228	1.25	2.5	4	2.58333	1.36923	1.70065
B2RSU6	CGNL1	Cingulin-like 1 OS=Mus musculus GN=Cgnl1 PE=1 SV=1	0	3	10	0	0	3	50	80	73.3333	50	20	26.6667	0.0506218	1	4	2.75	2.58333	1.36923	1.29566
F6PYV5	UBAP2	Ubiquitin-associated protein 2 (Fragment) OS=Mus musculus GN=Ubap2 PE=1 SV=1	0	4	6	0	0	3	50	83.3333	63.6364	50	16.6667	36.3636	0.0839993	1	5	1.75	2.58333	1.36923	1.07572
Q542D9	TFRC	Transferrin receptor protein 1 OS=Mus musculus GN=Tfrc PE=1 SV=1	0	4	11	0	0	6	50	83.3333	63.1579	50	16.6667	36.8421	0.0865889	1	5	1.71429	2.57143	1.36257	1.06254
Q61151	PPP2R5E	Serine/threonine-protein phosphatase 2A 56 kDa regulatory subunit epsilon isoform OS=Mus musculus GN=Ppp2r5e PE=1 SV=3	2	4	2	0	2	0	75	62.5	75	25	37.5	25	0.00211065	3	1.66667	3	2.55556	1.35364	2.67558
Q3THS6	MAT2A	S-adenosylmethionine synthase isoform type-2 OS=Mus musculus GN=Mat2a PE=1 SV=2	0	4	4	0	0	2	50	83.3333	62.5	50	16.6667	37.5	0.0903773	1	5	1.66667	2.55556	1.35364	1.04394
D6REF3	YWHAE	14-3-3 protein epsilon OS=Mus musculus GN=Ywhae PE=1 SV=1	5	0	1	0	0	2	85.7143	50	40	14.2857	50	60	0.431626	6	1	0.666667	2.55556	1.35364	0.364892
G3X8X7	VPS16	Vacuolar protein sorting 16 (Yeast) OS=Mus musculus GN=Vps16 PE=1 SV=1	1	5	3	2	1	0	40	75	80	60	25	20	0.167103	0.666667	3	4	2.55556	1.35364	0.777015
P18760	CFL1	Cofilin-1 OS=Mus musculus GN=Cfl1 PE=1 SV=3	5	7	6	0	7	12	85.7143	50	35	14.2857	50	65	0.551608	6	1	0.538462	2.51282	1.32931	0.25837
G3UYD0	GTF2I	General transcription factor II-I OS=Mus musculus GN=Gtf2i PE=1 SV=1	5	6	5	0	8	7	85.7143	43.75	42.8571	14.2857	56.25	57.1429	0.498098	6	0.777778	0.75	2.50926	1.32726	0.302685
A2A5Z6	SMURF2	E3 ubiquitin-protein ligase SMURF2 OS=Mus musculus GN=Smurf2 PE=1 SV=1	2	2	2	0	0	1	75	75	60	25	25	40	0.00481268	3	3	1.5	2.5	1.32193	2.31761
Q8BZ03	PRKD2	Serine/threonine-protein kinase D2 OS=Mus musculus GN=Prkd2 PE=1 SV=1	3	2	3	0	1	1	80	60	66.6667	20	40	33.3333	0.0104697	4	1.5	2	2.5	1.32193	1.98007
B2RRE7	OTUD4	OTU domain-containing protein 4 OS=Mus musculus GN=Otud4 PE=1 SV=1	5	4	3	5	1	0	50	71.4286	80	50	28.5714	20	0.0531258	1	2.5	4	2.5	1.32193	1.27469
Q3TZI5	MSH2	DNA mismatch repair protein Msh2 OS=Mus musculus GN=Msh2 PE=1 SV=1	4	5	6	0	3	6	83.3333	60	50	16.6667	40	50	0.107419	5	1.5	1	2.5	1.32193	0.96892
Q80TM9	NISCH	Nischarin OS=Mus musculus GN=Nisch PE=1 SV=2	3	0	2	0	1	0	80	33.3333	75	20	66.6667	25	0.288939	4	0.5	3	2.5	1.32193	0.539194
D3Z7P0	BRE	BRCA1-A complex subunit BRE OS=Mus musculus GN=Bre PE=1 SV=3	0	2	3	1	0	0	33.3333	75	80	66.6667	25	20	0.288939	0.5	3	4	2.5	1.32193	0.539194
Q542P8	EMG1	EMG1 nucleolar protein homolog (S. cerevisiae), isoform CRA_a OS=Mus musculus GN=Emg1 PE=1 SV=1	2	3	0	0	0	1	75	80	33.3333	25	20	66.6667	0.288939	3	4	0.5	2.5	1.32193	0.539194
P68181	PRKACB	cAMP-dependent protein kinase catalytic subunit beta OS=Mus musculus GN=Prkacb PE=1 SV=2	2	3	0	0	0	1	75	80	33.3333	25	20	66.6667	0.288939	3	4	0.5	2.5	1.32193	0.539194
O70126	AURKB	Aurora kinase B OS=Mus musculus GN=Aurkb PE=1 SV=2	0	3	2	1	0	0	33.3333	80	75	66.6667	20	25	0.288939	0.5	4	3	2.5	1.32193	0.539194
Q3TFP0	SRSF10	Serine/arginine-rich-splicing factor 10 OS=Mus musculus GN=Srsf10 PE=1 SV=1	4	0	1	0	1	0	83.3333	33.3333	66.6667	16.6667	66.6667	33.3333	0.345271	5	0.5	2	2.5	1.32193	0.461839
B2RRT9	ZRANB2	Zinc finger Ran-binding domain-containing protein 2 OS=Mus musculus GN=Zranb2 PE=1 SV=1	0	5	5	1	0	5	33.3333	85.7143	50	66.6667	14.2857	50	0.592314	0.5	6	1	2.5	1.32193	0.227448
E9PUG7	EIF2D	Eukaryotic translation initiation factor 2D OS=Mus musculus GN=Eif2d PE=1 SV=1	2	4	4	3	2	0	42.8571	62.5	83.3333	57.1429	37.5	16.6667	0.193609	0.75	1.66667	5	2.47222	1.30581	0.713074
Q8BP71	RBFOX2	RNA binding protein fox-1 homolog 2 OS=Mus musculus GN=Rbfox2 PE=1 SV=2	4	6	3	0	4	3	83.3333	58.3333	50	16.6667	41.6667	50	0.121393	5	1.4	1	2.46667	1.30256	0.915807
Q9CQJ2	PIH1D1	PIH1 domain-containing protein 1 OS=Mus musculus GN=Pih1d1 PE=1 SV=1	4	6	5	0	4	5	83.3333	58.3333	50	16.6667	41.6667	50	0.121393	5	1.4	1	2.46667	1.30256	0.915807
Q9D0I9	RARS	Arginine--tRNA ligase, cytoplasmic OS=Mus musculus GN=Rars PE=1 SV=2	4	17	14	0	14	12	83.3333	54.5455	53.5714	16.6667	45.4545	46.4286	0.115911	5	1.2	1.15385	2.45128	1.29354	0.935874
A0A0H2UH13	ELP6	Elongator complex protein 6 OS=Mus musculus GN=Elp6 PE=1 SV=1	0	6	3	0	2	0	50	70	80	50	30	20	0.0556545	1	2.33333	4	2.44444	1.28951	1.2545
P53996	CNBP	Cellular nucleic acid-binding protein OS=Mus musculus GN=Cnbp PE=1 SV=2	0	2	3	2	0	0	25	75	80	75	25	20	0.465746	0.333333	3	4	2.44444	1.28951	0.331851
A2APV2	FMNL2	Formin-like protein 2 OS=Mus musculus GN=Fmnl2 PE=1 SV=2	3	4	4	2	0	4	57.1429	83.3333	50	42.8571	16.6667	50	0.132807	1.33333	5	1	2.44444	1.28951	0.87678
D3YU95	CYTH2	Cytohesin-2 OS=Mus musculus GN=Cyth2 PE=1 SV=1	4	3	0	0	2	0	83.3333	57.1429	50	16.6667	42.8571	50	0.132807	5	1.33333	1	2.44444	1.28951	0.87678
Q3TWG5	DYNC1LI1	Cytoplasmic dynein 1 light intermediate chain 1 OS=Mus musculus GN=Dync1li1 PE=1 SV=1	0	4	7	0	0	5	50	83.3333	57.1429	50	16.6667	42.8571	0.132807	1	5	1.33333	2.44444	1.28951	0.87678
D3Z4V1	PLRG1	Pleiotropic regulator 1 OS=Mus musculus GN=Plrg1 PE=1 SV=1	3	0	2	0	2	0	80	25	75	20	75	25	0.465746	4	0.333333	3	2.44444	1.28951	0.331851
Q3TIV5	ZC3H15	Zinc finger CCCH domain-containing protein 15 OS=Mus musculus GN=Zc3h15 PE=1 SV=2	7	6	4	8	4	0	47.0588	58.3333	83.3333	52.9412	41.6667	16.6667	0.163747	0.888889	1.4	5	2.42963	1.28074	0.785827
A0MNP4	WDR61	CDW13/WDR61 OS=Mus musculus GN=Wdr61 PE=1 SV=1	4	9	4	0	6	5	83.3333	58.8235	45.4545	16.6667	41.1765	54.5455	0.185158	5	1.42857	0.833333	2.42063	1.27539	0.732457
Q924T3	XRCC4	DNA repair protein XRCC4 OS=Mus musculus GN=Xrcc4 PE=1 SV=1	4	1	4	0	1	3	83.3333	50	55.5556	16.6667	50	44.4444	0.150033	5	1	1.25	2.41667	1.27302	0.823812
Q8CE90	MAP2K7	Dual specificity mitogen-activated protein kinase kinase 7 OS=Mus musculus GN=Map2k7 PE=1 SV=1	0	4	4	0	0	3	50	83.3333	55.5556	50	16.6667	44.4444	0.150033	1	5	1.25	2.41667	1.27302	0.823812
Q9Z1X4	ILF3	Interleukin enhancer-binding factor 3 OS=Mus musculus GN=Ilf3 PE=1 SV=2	9	6	4	9	5	0	50	53.8462	83.3333	50	46.1538	16.6667	0.171317	1	1.16667	5	2.38889	1.25634	0.766199
Q8CJF9	37834	Protein argonaute-3 OS=Mus musculus GN=Ago3 PE=2 SV=2	5	5	4	8	3	0	40	60	83.3333	60	40	16.6667	0.277829	0.666667	1.5	5	2.38889	1.25634	0.556223
A2A6U3	40057	Septin-9 OS=Mus musculus GN=Sept9 PE=1 SV=1	7	4	0	6	0	0	53.3333	83.3333	50	46.6667	16.6667	50	0.178278	1.14286	5	1	2.38095	1.25154	0.748902
O54825	BYSL	Bystin OS=Mus musculus GN=Bysl PE=1 SV=3	2	9	7	0	6	2	75	58.8235	72.7273	25	41.1765	27.2727	0.00620167	3	1.42857	2.66667	2.36508	1.24189	2.20749
Q9D753	EXOSC8	Exosome complex component RRP43 OS=Mus musculus GN=Exosc8 PE=1 SV=1	5	0	3	0	3	4	85.7143	20	44.4444	14.2857	80	55.5556	0.997073	6	0.25	0.8	2.35	1.23266	0.00127283
Q8BG02	PPP2R2C	Serine/threonine-protein phosphatase 2A 55 kDa regulatory subunit B gamma isoform OS=Mus musculus GN=Ppp2r2c PE=1 SV=1	2	0	2	0	0	0	75	50	75	25	50	25	0.0474207	3	1	3	2.33333	1.22239	1.32403
Q4VAA9	METAP1	Methionine aminopeptidase 1 OS=Mus musculus GN=Metap1 PE=1 SV=1	2	2	0	0	0	0	75	75	50	25	25	50	0.0474207	3	3	1	2.33333	1.22239	1.32403
Q9CQI9	MED30	Mediator of RNA polymerase II transcription subunit 30 OS=Mus musculus GN=Med30 PE=1 SV=1	2	2	0	0	0	0	75	75	50	25	25	50	0.0474207	3	3	1	2.33333	1.22239	1.32403
E9Q8I7	NFXL1	Protein Nfxl1 OS=Mus musculus GN=Nfxl1 PE=1 SV=1	0	2	2	0	0	0	50	75	75	50	25	25	0.0474207	1	3	3	2.33333	1.22239	1.32403
Q8BJZ4	MRPS35	28S ribosomal protein S35, mitochondrial OS=Mus musculus GN=Mrps35 PE=1 SV=2	0	2	2	0	0	0	50	75	75	50	25	25	0.0474207	1	3	3	2.33333	1.22239	1.32403
Q62523	ZYX	Zyxin OS=Mus musculus GN=Zyx PE=1 SV=2	0	2	2	0	0	0	50	75	75	50	25	25	0.0474207	1	3	3	2.33333	1.22239	1.32403
Q148V8	FAM83H	Protein FAM83H OS=Mus musculus GN=Fam83h PE=1 SV=1	0	2	2	0	0	0	50	75	75	50	25	25	0.0474207	1	3	3	2.33333	1.22239	1.32403
G5E8C4	TMTC3	MCG142017, isoform CRA_a OS=Mus musculus GN=Tmtc3 PE=1 SV=1	0	2	2	0	0	0	50	75	75	50	25	25	0.0474207	1	3	3	2.33333	1.22239	1.32403
Q9R078	PRKAB1	5~-AMP-activated protein kinase subunit beta-1 OS=Mus musculus GN=Prkab1 PE=1 SV=2	0	2	2	0	0	0	50	75	75	50	25	25	0.0474207	1	3	3	2.33333	1.22239	1.32403
F6SWS9	NELFB	Negative elongation factor B (Fragment) OS=Mus musculus GN=Nelfb PE=1 SV=1	0	2	2	0	0	0	50	75	75	50	25	25	0.0474207	1	3	3	2.33333	1.22239	1.32403
D3YVU0	USP46	Ubiquitin carboxyl-terminal hydrolase 46 OS=Mus musculus GN=Usp46 PE=1 SV=1	0	2	2	0	0	0	50	75	75	50	25	25	0.0474207	1	3	3	2.33333	1.22239	1.32403
F8WIG5	DIAP3	Protein diaphanous homolog 3 OS=Mus musculus GN=Diap3 PE=1 SV=2	0	2	2	0	0	0	50	75	75	50	25	25	0.0474207	1	3	3	2.33333	1.22239	1.32403
Q8JZS0	LIN7A	Protein lin-7 homolog A OS=Mus musculus GN=Lin7a PE=1 SV=2	2	3	3	2	0	1	50	80	66.6667	50	20	33.3333	0.0643217	1	4	2	2.33333	1.22239	1.19164
Q9JJ66	CDC20	Cell division cycle protein 20 homolog OS=Mus musculus GN=Cdc20 PE=1 SV=2	3	3	1	0	1	1	80	66.6667	50	20	33.3333	50	0.0643217	4	2	1	2.33333	1.22239	1.19164
D3YVY9	DSCC1	Protein Dscc1 OS=Mus musculus GN=Dscc1 PE=1 SV=1	3	3	3	3	0	1	50	80	66.6667	50	20	33.3333	0.0643217	1	4	2	2.33333	1.22239	1.19164
Q8R5L1	C1QBP	Complement component 1 Q subcomponent-binding protein, mitochondrial OS=Mus musculus GN=C1qbp PE=1 SV=1	3	3	0	1	0	0	66.6667	80	50	33.3333	20	50	0.0643217	2	4	1	2.33333	1.22239	1.19164
Q3U3J3	POLRMT	DNA-directed RNA polymerase OS=Mus musculus GN=Polrmt PE=1 SV=1	0	3	3	0	1	0	50	66.6667	80	50	33.3333	20	0.0643217	1	2	4	2.33333	1.22239	1.19164
G3UW74	MED16	Mediator of RNA polymerase II transcription subunit 16 OS=Mus musculus GN=Med16 PE=1 SV=1	3	0	1	0	0	0	80	50	66.6667	20	50	33.3333	0.0643217	4	1	2	2.33333	1.22239	1.19164
Q6PDL0	DYNC1LI2	Cytoplasmic dynein 1 light intermediate chain 2 OS=Mus musculus GN=Dync1li2 PE=1 SV=2	0	3	1	0	0	0	50	80	66.6667	50	20	33.3333	0.0643217	1	4	2	2.33333	1.22239	1.19164
Q3UXS0	SCAMP3	Secretory carrier-associated membrane protein 3 OS=Mus musculus GN=Scamp3 PE=1 SV=1	0	3	1	0	0	0	50	80	66.6667	50	20	33.3333	0.0643217	1	4	2	2.33333	1.22239	1.19164
Q8C4Y3	NELFB	Negative elongation factor B OS=Mus musculus GN=Nelfb PE=1 SV=2	0	3	1	0	0	0	50	80	66.6667	50	20	33.3333	0.0643217	1	4	2	2.33333	1.22239	1.19164
D3YXA2	DBR1	Lariat debranching enzyme (Fragment) OS=Mus musculus GN=Dbr1 PE=1 SV=1	0	3	1	0	0	0	50	80	66.6667	50	20	33.3333	0.0643217	1	4	2	2.33333	1.22239	1.19164
Q99J09	WDR77	Methylosome protein 50 OS=Mus musculus GN=Wdr77 PE=1 SV=1	1	3	2	0	0	2	66.6667	80	50	33.3333	20	50	0.0643217	2	4	1	2.33333	1.22239	1.19164
Q9CZU6	CS	Citrate synthase, mitochondrial OS=Mus musculus GN=Cs PE=1 SV=1	1	3	2	0	0	2	66.6667	80	50	33.3333	20	50	0.0643217	2	4	1	2.33333	1.22239	1.19164
F7AJZ3	TUBGCP3	Gamma-tubulin complex component 3 (Fragment) OS=Mus musculus GN=Tubgcp3 PE=1 SV=1	3	1	0	0	0	0	80	66.6667	50	20	33.3333	50	0.0643217	4	2	1	2.33333	1.22239	1.19164
F8WJ43	NF2	Merlin (Fragment) OS=Mus musculus GN=Nf2 PE=1 SV=1	3	1	0	0	0	0	80	66.6667	50	20	33.3333	50	0.0643217	4	2	1	2.33333	1.22239	1.19164
A0A0G2JEM3	SBNO1	Protein strawberry notch homolog 1 (Fragment) OS=Mus musculus GN=Sbno1 PE=1 SV=1	0	1	3	0	0	0	50	66.6667	80	50	33.3333	20	0.0643217	1	2	4	2.33333	1.22239	1.19164
Q924C1	XPO5	Exportin-5 OS=Mus musculus GN=Xpo5 PE=1 SV=1	0	1	3	0	0	0	50	66.6667	80	50	33.3333	20	0.0643217	1	2	4	2.33333	1.22239	1.19164
Q8BPM0	DAAM1	Disheveled-associated activator of morphogenesis 1 OS=Mus musculus GN=Daam1 PE=1 SV=4	0	1	3	0	0	0	50	66.6667	80	50	33.3333	20	0.0643217	1	2	4	2.33333	1.22239	1.19164
Q3TPX4	EXOC5	Exocyst complex component 5 OS=Mus musculus GN=Exoc5 PE=1 SV=2	1	3	0	0	0	0	66.6667	80	50	33.3333	20	50	0.0643217	2	4	1	2.33333	1.22239	1.19164
A2ALW5	DNAJC25	DnaJ homolog subfamily C member 25 OS=Mus musculus GN=Dnajc25 PE=1 SV=1	0	4	1	0	0	1	50	83.3333	50	50	16.6667	50	0.2302	1	5	1	2.33333	1.22239	0.637895
H3BJ97	TINAGL1	Tubulointerstitial nephritis antigen-like OS=Mus musculus GN=Tinagl1 PE=1 SV=1	0	4	3	0	0	3	50	83.3333	50	50	16.6667	50	0.2302	1	5	1	2.33333	1.22239	0.637895
A0A0G2JEA0	ANKIB1	Ankyrin repeat and IBR domain-containing protein 1 (Fragment) OS=Mus musculus GN=Ankib1 PE=1 SV=1	0	4	3	0	0	3	50	83.3333	50	50	16.6667	50	0.2302	1	5	1	2.33333	1.22239	0.637895
A0A0A0MQC2	PLEKHG5	Pleckstrin homology domain-containing family G member 5 OS=Mus musculus GN=Plekhg5 PE=1 SV=1	0	4	4	0	4	0	50	50	83.3333	50	50	16.6667	0.2302	1	1	5	2.33333	1.22239	0.637895
F6TPX8	AP2A1	AP-2 complex subunit alpha-1 (Fragment) OS=Mus musculus GN=Ap2a1 PE=1 SV=1	4	5	6	0	5	6	83.3333	50	50	16.6667	50	50	0.2302	5	1	1	2.33333	1.22239	0.637895
Q4FK36	DSTN	Destrin OS=Mus musculus GN=Dstn PE=1 SV=1	3	3	4	2	5	0	57.1429	40	83.3333	42.8571	60	16.6667	0.317831	1.33333	0.666667	5	2.33333	1.22239	0.497804
Q3TWR3	PRKAG1	5~-AMP-activated protein kinase subunit gamma-1 OS=Mus musculus GN=Prkag1 PE=1 SV=1	0	5	4	1	3	0	33.3333	60	83.3333	66.6667	40	16.6667	0.433256	0.5	1.5	5	2.33333	1.22239	0.363256
Q9DBG7	SRPR	Signal recognition particle receptor subunit alpha OS=Mus musculus GN=Srpr PE=1 SV=1	19	19	11	11	4	9	62.5	80	54.5455	37.5	20	45.4545	0.0419786	1.66667	4	1.2	2.28889	1.19465	1.37697
Q3V117	ACLY	ATP-citrate synthase OS=Mus musculus GN=Acly PE=1 SV=1	4	11	18	0	9	28	83.3333	54.5455	39.5833	16.6667	45.4545	60.4167	0.370313	5	1.2	0.655172	2.28506	1.19223	0.431431
B1AZS9	PRDX4	Peroxiredoxin-4 (Fragment) OS=Mus musculus GN=Prdx4 PE=1 SV=1	4	4	2	5	0	2	45.4545	83.3333	50	54.5455	16.6667	50	0.319222	0.833333	5	1	2.27778	1.18763	0.495907
Q8CJF8	38200	Protein argonaute-4 OS=Mus musculus GN=Ago4 PE=2 SV=2	4	4	0	5	0	0	45.4545	83.3333	50	54.5455	16.6667	50	0.319222	0.833333	5	1	2.27778	1.18763	0.495907
Q3UMG5 & F7AAC3 & F6VQ19	LRCH2	Leucine-rich repeat and calponin homology domain-containing protein 2 OS=Mus musculus GN=Lrch2 PE=2 SV=2	15	21	15	8	5	11	64	78.5714	57.1429	36	21.4286	42.8571	0.0206672	1.77778	3.66667	1.33333	2.25926	1.17585	1.68472
E0CXD6	TNIK	Traf2 and NCK-interacting protein kinase OS=Mus musculus GN=Tnik PE=1 SV=1	0	6	3	0	3	0	50	63.6364	80	50	36.3636	20	0.076654	1	1.75	4	2.25	1.16993	1.11547
Q9WVH9	FBLN5	Fibulin-5 OS=Mus musculus GN=Fbln5 PE=1 SV=1	1	3	2	0	0	3	66.6667	80	42.8571	33.3333	20	57.1429	0.161477	2	4	0.75	2.25	1.16993	0.791889
Q8BL80	ARHGAP22	Rho GTPase-activating protein 22 OS=Mus musculus GN=Arhgap22 PE=1 SV=2	0	5	4	0	7	0	50	42.8571	83.3333	50	57.1429	16.6667	0.378291	1	0.75	5	2.25	1.16993	0.422174
A0A0A0MQF5	OTUD6B	OTU domain-containing protein 6B OS=Mus musculus GN=Otud6b PE=1 SV=1	0	4	2	0	0	3	50	83.3333	42.8571	50	16.6667	57.1429	0.378291	1	5	0.75	2.25	1.16993	0.422174
O77727	KRT15	Keratin, type I cytoskeletal 15 (Contact-Cont) OS=Ovis aries GN=KRT15 PE=2 SV=1	5	4	0	7	0	0	42.8571	83.3333	50	57.1429	16.6667	50	0.378291	0.75	5	1	2.25	1.16993	0.422174
Q922Q2	RIOK1	Serine/threonine-protein kinase RIO1 OS=Mus musculus GN=Riok1 PE=1 SV=2	3	4	4	0	2	4	80	62.5	50	20	37.5	50	0.0826867	4	1.66667	1	2.22222	1.152	1.08256
Q8BH43	WASF2	Wiskott-Aldrich syndrome protein family member 2 OS=Mus musculus GN=Wasf2 PE=1 SV=1	3	4	4	0	2	4	80	62.5	50	20	37.5	50	0.0826867	4	1.66667	1	2.22222	1.152	1.08256
Q8K205	POP1	Blood vessel epicardial substance OS=Mus musculus GN=Pop1 PE=1 SV=1	0	3	4	0	0	2	50	80	62.5	50	20	37.5	0.0826867	1	4	1.66667	2.22222	1.152	1.08256
Q6PGG6	GNL3L	Guanine nucleotide-binding protein-like 3-like protein OS=Mus musculus GN=Gnl3l PE=1 SV=1	0	4	3	0	2	0	50	62.5	80	50	37.5	20	0.0826867	1	1.66667	4	2.22222	1.152	1.08256
Q69ZS7	HBS1L	HBS1-like protein OS=Mus musculus GN=Hbs1l PE=1 SV=2	0	4	3	0	2	0	50	62.5	80	50	37.5	20	0.0826867	1	1.66667	4	2.22222	1.152	1.08256
P54775	PSMC4	26S protease regulatory subunit 6B OS=Mus musculus GN=Psmc4 PE=1 SV=2	0	4	3	0	0	5	50	83.3333	40	50	16.6667	60	0.448352	1	5	0.666667	2.22222	1.152	0.348381
Q8CES0	NAA30	N-alpha-acetyltransferase 30 OS=Mus musculus GN=Naa30 PE=1 SV=2	3	3	3	0	2	2	80	57.1429	57.1429	20	42.8571	42.8571	0.0519034	4	1.33333	1.33333	2.22222	1.152	1.2848
Q9Z110	ALDH18A1	Delta-1-pyrroline-5-carboxylate synthase OS=Mus musculus GN=Aldh18a1 PE=1 SV=2	17	21	49	13	4	52	56.25	81.4815	48.5437	43.75	18.5185	51.4563	0.160707	1.28571	4.4	0.943396	2.2097	1.14385	0.793966
E9Q6H4	CUL7	Cullin-7 OS=Mus musculus GN=Cul7 PE=1 SV=1	4	4	0	7	0	0	38.4615	83.3333	50	61.5385	16.6667	50	0.487602	0.625	5	1	2.20833	1.14296	0.311934
Q8R2U0	SEH1L	Nucleoporin SEH1 OS=Mus musculus GN=Seh1l PE=2 SV=1	7	3	0	4	0	0	61.5385	80	50	38.4615	20	50	0.088498	1.6	4	1	2.2	1.1375	1.05307
Q8BND3	WDR35	WD repeat-containing protein 35 OS=Mus musculus GN=Wdr35 PE=1 SV=3	2	2	2	0	0	4	75	75	37.5	25	25	62.5	0.2302	3	3	0.6	2.2	1.1375	0.637895
Q6P6L6	GEMIN4	Gem (Nuclear organelle) associated protein 4 OS=Mus musculus GN=Gemin4 PE=1 SV=1	6	9	6	2	2	7	70	76.9231	46.6667	30	23.0769	53.3333	0.0881206	2.33333	3.33333	0.875	2.18056	1.1247	1.05492
Q62376	SNRNP70	U1 small nuclear ribonucleoprotein 70 kDa OS=Mus musculus GN=Snrnp70 PE=1 SV=2	2	6	5	0	2	4	75	70	54.5455	25	30	45.4545	0.0192068	3	2.33333	1.2	2.17778	1.12286	1.71654
Q60848	HELLS	Lymphocyte-specific helicase OS=Mus musculus GN=Hells PE=1 SV=2	19	15	9	7	7	4	71.4286	66.6667	66.6667	28.5714	33.3333	33.3333	8.36435e-05	2.5	2	2	2.16667	1.11548	4.07757
Q8CBE3	WDR37	WD repeat-containing protein 37 OS=Mus musculus GN=Wdr37 PE=1 SV=1	0	4	5	0	1	1	50	71.4286	75	50	28.5714	25	0.0486302	1	2.5	3	2.16667	1.11548	1.31309
Q5SWD9	TSR1	Pre-rRNA-processing protein TSR1 homolog OS=Mus musculus GN=Tsr1 PE=1 SV=1	11	15	9	3	5	11	75	72.7273	45.4545	25	27.2727	54.5455	0.0985923	3	2.66667	0.833333	2.16667	1.11548	1.00616
Q9CZU4	ERAL1	GTPase Era, mitochondrial OS=Mus musculus GN=Eral1 PE=2 SV=1	0	2	3	0	1	0	50	60	80	50	40	20	0.0993007	1	1.5	4	2.16667	1.11548	1.00305
Q6ZQ04	FRMD4B	FERM domain-containing protein 4B (Fragment) OS=Mus musculus GN=Frmd4b PE=1 SV=1	0	2	3	0	1	0	50	60	80	50	40	20	0.0993007	1	1.5	4	2.16667	1.11548	1.00305
E9QN12	PDGFRB	Platelet-derived growth factor receptor beta OS=Mus musculus GN=Pdgfrb PE=1 SV=1	0	3	2	0	0	1	50	80	60	50	20	40	0.0993007	1	4	1.5	2.16667	1.11548	1.00305
P29268	CTGF	Connective tissue growth factor OS=Mus musculus GN=Ctgf PE=2 SV=3	5	3	4	3	0	4	60	80	50	40	20	50	0.0993007	1.5	4	1	2.16667	1.11548	1.00305
Q78P92	FRG1	FSHD Region Gene 1 protein OS=Mus musculus GN=Frg1 PE=1 SV=1	4	3	2	4	0	1	50	80	60	50	20	40	0.0993007	1	4	1.5	2.16667	1.11548	1.00305
A1L3S7	GATAD2B	Gatad2b protein OS=Mus musculus GN=Gatad2b PE=1 SV=1	5	3	0	3	0	0	60	80	50	40	20	50	0.0993007	1.5	4	1	2.16667	1.11548	1.00305
Q8C2T6	POLA2	DNA polymerase alpha subunit B OS=Mus musculus GN=Pola2 PE=1 SV=1	0	1	3	1	0	0	33.3333	66.6667	80	66.6667	33.3333	20	0.3658	0.5	2	4	2.16667	1.11548	0.436756
Q8BFV2	PCID2	PCI domain-containing protein 2 OS=Mus musculus GN=Pcid2 PE=1 SV=1	0	3	1	1	0	0	33.3333	80	66.6667	66.6667	20	33.3333	0.3658	0.5	4	2	2.16667	1.11548	0.436756
Q8CJ40	CROCC	Rootletin OS=Mus musculus GN=Crocc PE=1 SV=2	3	2	4	0	3	2	80	42.8571	62.5	20	57.1429	37.5	0.195238	4	0.75	1.66667	2.13889	1.09686	0.709435
Q3UI33	METAP2	Methionine aminopeptidase 2 OS=Mus musculus GN=Metap2 PE=1 SV=1	3	14	11	0	13	8	80	51.7241	57.1429	20	48.2759	42.8571	0.10196	4	1.07143	1.33333	2.13492	1.09418	0.991571
Q9JM96	CDC42EP4	Cdc42 effector protein 4 OS=Mus musculus GN=Cdc42ep4 PE=1 SV=1	0	3	6	0	0	4	50	80	58.3333	50	20	41.6667	0.113353	1	4	1.4	2.13333	1.09311	0.945569
Q6NXJ0	WWC2	Protein WWC2 OS=Mus musculus GN=Wwc2 PE=1 SV=1	7	24	18	4	6	15	61.5385	78.125	54.2857	38.4615	21.875	45.7143	0.04254	1.6	3.57143	1.1875	2.11964	1.08382	1.3712
Q9D4H1	EXOC2	Exocyst complex component 2 OS=Mus musculus GN=Exoc2 PE=1 SV=1	0	9	9	0	2	4	50	76.9231	66.6667	50	23.0769	33.3333	0.0588449	1	3.33333	2	2.11111	1.078	1.23029
P17751	TPI1	Triosephosphate isomerase OS=Mus musculus GN=Tpi1 PE=1 SV=4	3	3	2	2	0	2	57.1429	80	50	42.8571	20	50	0.12506	1.33333	4	1	2.11111	1.078	0.902883
B2RVL6	ZCCHC24	Zinc finger CCHC domain-containing protein 24 OS=Mus musculus GN=Zcchc24 PE=1 SV=1	3	3	1	2	0	1	57.1429	80	50	42.8571	20	50	0.12506	1.33333	4	1	2.11111	1.078	0.902883
B2RRY4	MPP5	MAGUK p55 subfamily member 5 OS=Mus musculus GN=Mpp5 PE=1 SV=1	3	0	3	0	0	2	80	50	57.1429	20	50	42.8571	0.12506	4	1	1.33333	2.11111	1.078	0.902883
Q3UYV9	NCBP1	Nuclear cap-binding protein subunit 1 OS=Mus musculus GN=Ncbp1 PE=1 SV=2	4	7	5	5	1	3	45.4545	80	60	54.5455	20	40	0.170432	0.833333	4	1.5	2.11111	1.078	0.768449
Q9QXE7	TBL1X	F-box-like/WD repeat-containing protein TBL1X OS=Mus musculus GN=Tbl1x PE=1 SV=2	2	2	0	0	0	2	75	75	25	25	25	75	0.518519	3	3	0.333333	2.11111	1.078	0.285236
Q3UGS4	FAM195B	Protein FAM195B OS=Mus musculus GN=Fam195b PE=1 SV=1	3	3	0	0	1	2	80	66.6667	25	20	33.3333	75	0.570858	4	2	0.333333	2.11111	1.078	0.243472
A2BEE9	DLG3	Disks large homolog 3 OS=Mus musculus GN=Dlg3 PE=1 SV=1	0	3	1	2	0	0	25	80	66.6667	75	20	33.3333	0.570858	0.333333	4	2	2.11111	1.078	0.243472
Q1HL32	SMC3	Structural maintenance of chromosomes protein OS=Mus musculus GN=Smc3 PE=1 SV=1	25	31	28	15	12	12	61.9048	71.1111	69.0476	38.0952	28.8889	30.9524	0.000920183	1.625	2.46154	2.23077	2.10577	1.07435	3.03613
Q7TQH0 & Q3TGG2	ATXN2L	Ataxin-2-like protein OS=Mus musculus GN=Atxn2l PE=1 SV=1	20	48	46	15	17	20	56.7568	73.1343	69.1176	43.2432	26.8657	30.8824	0.00939165	1.3125	2.72222	2.2381	2.09094	1.06415	2.02726
Q6P5D3	DHX57	Putative ATP-dependent RNA helicase DHX57 OS=Mus musculus GN=Dhx57 PE=1 SV=2	3	4	2	0	3	2	80	55.5556	50	20	44.4444	50	0.143052	4	1.25	1	2.08333	1.05889	0.844505
Q9CYD3	CRTAP	Cartilage-associated protein OS=Mus musculus GN=Crtap PE=1 SV=3	0	3	4	0	0	3	50	80	55.5556	50	20	44.4444	0.143052	1	4	1.25	2.08333	1.05889	0.844505
Q3UA06	TRIP13	Pachytene checkpoint protein 2 homolog OS=Mus musculus GN=Trip13 PE=1 SV=1	0	3	4	0	0	3	50	80	55.5556	50	20	44.4444	0.143052	1	4	1.25	2.08333	1.05889	0.844505
E0CXL4	PARD3	Partitioning defective 3 homolog OS=Mus musculus GN=Pard3 PE=1 SV=1	3	4	0	0	3	0	80	55.5556	50	20	44.4444	50	0.143052	4	1.25	1	2.08333	1.05889	0.844505
P18872	GNAO1	Guanine nucleotide-binding protein G(o) subunit alpha OS=Mus musculus GN=Gnao1 PE=1 SV=3	2	3	2	1	0	3	60	80	42.8571	40	20	57.1429	0.222458	1.5	4	0.75	2.08333	1.05889	0.652753
A0A0A6YXY3	SMC4	Structural maintenance of chromosomes protein 4 (Fragment) OS=Mus musculus GN=Smc4 PE=1 SV=1	1	0	3	0	3	0	66.6667	20	80	33.3333	80	20	0.688053	2	0.25	4	2.08333	1.05889	0.162378
E9QNE9	MAP4K3	Mitogen-activated protein kinase kinase kinase kinase OS=Mus musculus GN=Map4k3 PE=1 SV=1	0	4	5	3	0	5	20	83.3333	50	80	16.6667	50	0.935668	0.25	5	1	2.08333	1.05889	0.0288781
Q9D6Z1	NOP56	Nucleolar protein 56 OS=Mus musculus GN=Nop56 PE=1 SV=2	10	10	8	8	3	3	55	73.3333	69.2308	45	26.6667	30.7692	0.0156517	1.22222	2.75	2.25	2.07407	1.05247	1.80544
Q9D2N9	VPS33A	Vacuolar protein sorting-associated protein 33A OS=Mus musculus GN=Vps33a PE=1 SV=2	3	10	4	0	8	4	80	55	50	20	45	50	0.150033	4	1.22222	1	2.07407	1.05247	0.823812
Q8CGC7	EPRS	Bifunctional glutamate/proline--tRNA ligase OS=Mus musculus GN=Eprs PE=1 SV=4	0	14	9	0	7	2	50	65.2174	76.9231	50	34.7826	23.0769	0.0633879	1	1.875	3.33333	2.06944	1.04924	1.19799
G5E8T6	MAGI3	Membrane associated guanylate kinase, WW and PDZ domain containing 3, isoform CRA_a OS=Mus musculus GN=Magi3 PE=1 SV=1	3	0	5	0	4	2	80	16.6667	66.6667	20	83.3333	33.3333	0.760727	4	0.2	2	2.06667	1.04731	0.118771
Q14BR4	ARF4	ADP-ribosylation factor 4 OS=Mus musculus GN=Arf4 PE=1 SV=1	3	4	3	0	5	2	80	45.4545	57.1429	20	54.5455	42.8571	0.204408	4	0.833333	1.33333	2.05556	1.03953	0.689501
Q9D0M0	EXOSC7	Exosome complex exonuclease RRP42 OS=Mus musculus GN=Exosc7 PE=1 SV=2	3	6	2	2	3	0	57.1429	63.6364	75	42.8571	36.3636	25	0.0144298	1.33333	1.75	3	2.02778	1.0199	1.84074
P26043	RDX	Radixin OS=Mus musculus GN=Rdx PE=1 SV=3	21	18	10	18	6	4	53.6585	73.0769	68.75	46.3415	26.9231	31.25	0.0219051	1.15789	2.71429	2.2	2.02406	1.01725	1.65945
G3X9Q6	LARP4	La-related protein 4 OS=Mus musculus GN=Larp4 PE=1 SV=1	11	13	11	4	5	8	70.5882	70	57.1429	29.4118	30	42.8571	0.00684377	2.4	2.33333	1.33333	2.02222	1.01594	2.1647
Q9Z0N2	EIF2S3Y	Eukaryotic translation initiation factor 2 subunit 3, Y-linked OS=Mus musculus GN=Eif2s3y PE=1 SV=2	37	36	33	17	17	17	67.8571	67.2727	65.3846	32.1429	32.7273	34.6154	5.74457e-06	2.11111	2.05556	1.88889	2.01852	1.0133	5.24074
D3YZW1	SRGAP1	SLIT-ROBO Rho GTPase-activating protein 1 OS=Mus musculus GN=Srgap1 PE=1 SV=1	11	8	8	5	3	4	66.6667	69.2308	64.2857	33.3333	30.7692	35.7143	7.77301e-05	2	2.25	1.8	2.01667	1.01197	4.10941
Q6IFZ9	KRT74	Keratin, type II cytoskeletal 74 OS=Mus musculus GN=Krt74 PE=3 SV=1	4	3	5	5	0	4	45.4545	80	54.5455	54.5455	20	45.4545	0.243155	0.833333	4	1.2	2.01111	1.00799	0.614116
Q8BZQ7	ANAPC2	Anaphase-promoting complex subunit 2 OS=Mus musculus GN=Anapc2 PE=1 SV=2	2	2	2	1	0	1	60	75	60	40	25	40	0.0132356	1.5	3	1.5	2	1	1.87826
Q6PFR5	TRA2A	Transformer-2 protein homolog alpha OS=Mus musculus GN=Tra2a PE=1 SV=1	2	2	2	1	1	0	60	60	75	40	40	25	0.0132356	1.5	1.5	3	2	1	1.87826
B2KF10	KCTD20	BTB/POZ domain-containing protein KCTD20 (Fragment) OS=Mus musculus GN=Kctd20 PE=4 SV=1	1	1	2	0	1	0	66.6667	50	75	33.3333	50	25	0.0556545	2	1	3	2	1	1.2545
Q80WS3	FBLL1	rRNA/tRNA 2~-O-methyltransferase fibrillarin-like protein 1 OS=Mus musculus GN=Fbll1 PE=2 SV=1	3	1	2	1	1	0	66.6667	50	75	33.3333	50	25	0.0556545	2	1	3	2	1	1.2545
Q3UZZ3	ICK	Serine/threonine-protein kinase ICK OS=Mus musculus GN=Ick PE=1 SV=1	1	0	2	0	0	0	66.6667	50	75	33.3333	50	25	0.0556545	2	1	3	2	1	1.2545
Q9QYS9	QKI	Protein quaking OS=Mus musculus GN=Qki PE=1 SV=1	2	1	0	0	0	0	75	66.6667	50	25	33.3333	50	0.0556545	3	2	1	2	1	1.2545
B1ATI0	ALDH3A2	Aldehyde dehydrogenase OS=Mus musculus GN=Aldh3a2 PE=1 SV=1	2	1	0	0	0	0	75	66.6667	50	25	33.3333	50	0.0556545	3	2	1	2	1	1.2545
Q9DBC7	PRKAR1A	cAMP-dependent protein kinase type I-alpha regulatory subunit OS=Mus musculus GN=Prkar1a PE=1 SV=3	0	1	2	0	0	0	50	66.6667	75	50	33.3333	25	0.0556545	1	2	3	2	1	1.2545
Q9D0N7	CHAF1B	Chromatin assembly factor 1 subunit B OS=Mus musculus GN=Chaf1b PE=1 SV=1	0	1	2	0	0	0	50	66.6667	75	50	33.3333	25	0.0556545	1	2	3	2	1	1.2545
E9PWU7	KIFC3	Kinesin-like protein OS=Mus musculus GN=Kifc3 PE=1 SV=1	0	1	2	0	0	0	50	66.6667	75	50	33.3333	25	0.0556545	1	2	3	2	1	1.2545
L0N7N1	KIF14	Kinesin-like protein KIF14 OS=Mus musculus GN=Kif14 PE=1 SV=1	0	1	2	0	0	0	50	66.6667	75	50	33.3333	25	0.0556545	1	2	3	2	1	1.2545
P10287	CDH3	Cadherin-3 OS=Mus musculus GN=Cdh3 PE=1 SV=2	0	1	2	0	0	0	50	66.6667	75	50	33.3333	25	0.0556545	1	2	3	2	1	1.2545
Q8C3I8	HGH1	Protein HGH1 homolog OS=Mus musculus GN=Hgh1 PE=1 SV=1	0	1	2	0	0	0	50	66.6667	75	50	33.3333	25	0.0556545	1	2	3	2	1	1.2545
Q6P9R1	DDX51	ATP-dependent RNA helicase DDX51 OS=Mus musculus GN=Ddx51 PE=1 SV=1	0	1	2	0	0	0	50	66.6667	75	50	33.3333	25	0.0556545	1	2	3	2	1	1.2545
A0A0A6YWH2	AIF1L	Allograft inflammatory factor 1-like OS=Mus musculus GN=Aif1l PE=1 SV=1	0	1	2	0	0	0	50	66.6667	75	50	33.3333	25	0.0556545	1	2	3	2	1	1.2545
Q56A08	GPKOW	G patch domain and KOW motifs-containing protein OS=Mus musculus GN=Gpkow PE=1 SV=2	0	1	2	0	0	0	50	66.6667	75	50	33.3333	25	0.0556545	1	2	3	2	1	1.2545
Q8BQM8	EML5	Echinoderm microtubule-associated protein-like 5 OS=Mus musculus GN=Eml5 PE=2 SV=2	0	1	2	0	0	0	50	66.6667	75	50	33.3333	25	0.0556545	1	2	3	2	1	1.2545
Q545F0	MIF	MCG3124, isoform CRA_b OS=Mus musculus GN=Mif PE=1 SV=1	0	2	1	0	0	0	50	75	66.6667	50	25	33.3333	0.0556545	1	3	2	2	1	1.2545
B1AQR8	LGALS9	Galectin OS=Mus musculus GN=Lgals9 PE=1 SV=1	0	2	1	0	0	0	50	75	66.6667	50	25	33.3333	0.0556545	1	3	2	2	1	1.2545
Q3V214	POLR2E	DNA-directed RNA polymerases I, II, and III subunit RPABC1 OS=Mus musculus GN=Polr2e PE=1 SV=1	0	2	1	0	0	0	50	75	66.6667	50	25	33.3333	0.0556545	1	3	2	2	1	1.2545
O35658	C1QBP	Complement component 1 Q subcomponent-binding protein, mitochondrial OS=Mus musculus GN=C1qbp PE=1 SV=1	0	2	1	0	0	0	50	75	66.6667	50	25	33.3333	0.0556545	1	3	2	2	1	1.2545
Q8C0V9	FRMD6	FERM domain-containing protein 6 OS=Mus musculus GN=Frmd6 PE=1 SV=2	0	2	1	0	0	0	50	75	66.6667	50	25	33.3333	0.0556545	1	3	2	2	1	1.2545
D3Z700	ERCC2	TFIIH basal transcription factor complex helicase XPD subunit OS=Mus musculus GN=Ercc2 PE=1 SV=1	0	2	1	0	0	0	50	75	66.6667	50	25	33.3333	0.0556545	1	3	2	2	1	1.2545
Q8BH76	POLD3	DNA polymerase delta subunit 3 OS=Mus musculus GN=Pold3 PE=1 SV=1	0	2	1	0	0	0	50	75	66.6667	50	25	33.3333	0.0556545	1	3	2	2	1	1.2545
B9EHN0	UBA1	Ubiquitin-activating enzyme E1, Chr X OS=Mus musculus GN=Uba1 PE=1 SV=1	0	2	1	0	0	0	50	75	66.6667	50	25	33.3333	0.0556545	1	3	2	2	1	1.2545
Q9ERH4	NUSAP1	Nucleolar and spindle-associated protein 1 OS=Mus musculus GN=Nusap1 PE=1 SV=1	0	2	1	0	0	0	50	75	66.6667	50	25	33.3333	0.0556545	1	3	2	2	1	1.2545
Q5SQ20	PES1	Pescadillo homolog OS=Mus musculus GN=Pes1 PE=1 SV=1	0	2	1	0	0	0	50	75	66.6667	50	25	33.3333	0.0556545	1	3	2	2	1	1.2545
D3YWB8	RPS6KB2	Ribosomal protein S6 kinase beta-2 OS=Mus musculus GN=Rps6kb2 PE=1 SV=1	0	2	1	0	0	0	50	75	66.6667	50	25	33.3333	0.0556545	1	3	2	2	1	1.2545
Q9DCT5	SDF2	Stromal cell-derived factor 2 OS=Mus musculus GN=Sdf2 PE=1 SV=1	0	2	1	0	0	0	50	75	66.6667	50	25	33.3333	0.0556545	1	3	2	2	1	1.2545
Q5SSK3	TEFM	Transcription elongation factor, mitochondrial OS=Mus musculus GN=Tefm PE=1 SV=1	0	2	1	0	0	0	50	75	66.6667	50	25	33.3333	0.0556545	1	3	2	2	1	1.2545
Q3UV71	TMTC1	Transmembrane and TPR repeat-containing protein 1 OS=Mus musculus GN=Tmtc1 PE=2 SV=2	0	2	1	0	0	0	50	75	66.6667	50	25	33.3333	0.0556545	1	3	2	2	1	1.2545
Q8C4J7	TBL3	Transducin beta-like protein 3 OS=Mus musculus GN=Tbl3 PE=2 SV=1	0	2	3	0	0	1	50	75	66.6667	50	25	33.3333	0.0556545	1	3	2	2	1	1.2545
Q9CXF7	CHD1L	Chromodomain-helicase-DNA-binding protein 1-like OS=Mus musculus GN=Chd1l PE=1 SV=1	0	3	2	0	1	0	50	66.6667	75	50	33.3333	25	0.0556545	1	2	3	2	1	1.2545
Q9CS74	ECD	Protein ecdysoneless homolog OS=Mus musculus GN=Ecd PE=1 SV=2	0	3	2	0	1	0	50	66.6667	75	50	33.3333	25	0.0556545	1	2	3	2	1	1.2545
A0A0A0MQM3	CYB5R3	NADH-cytochrome b5 reductase 3 (Fragment) OS=Mus musculus GN=Cyb5r3 PE=1 SV=4	0	3	2	0	1	0	50	66.6667	75	50	33.3333	25	0.0556545	1	2	3	2	1	1.2545
Q8BG67	EFR3A	Protein EFR3 homolog A OS=Mus musculus GN=Efr3a PE=1 SV=1	0	3	2	0	1	0	50	66.6667	75	50	33.3333	25	0.0556545	1	2	3	2	1	1.2545
Q8BGS1	EPB41L5	Band 4.1-like protein 5 OS=Mus musculus GN=Epb41l5 PE=1 SV=1	0	2	5	0	0	2	50	75	66.6667	50	25	33.3333	0.0556545	1	3	2	2	1	1.2545
E9Q8L9	RAB11FIP1	Rab11 family-interacting protein 1 OS=Mus musculus GN=Rab11fip1 PE=1 SV=1	0	2	7	0	0	3	50	75	66.6667	50	25	33.3333	0.0556545	1	3	2	2	1	1.2545
Q8BHE0	PRR11	Proline-rich protein 11 OS=Mus musculus GN=Prr11 PE=2 SV=1	3	0	1	0	0	1	80	50	50	20	50	50	0.2302	4	1	1	2	1	0.637895
O88845	AKAP10	A-kinase anchor protein 10, mitochondrial OS=Mus musculus GN=Akap10 PE=1 SV=3	0	1	3	0	1	0	50	50	80	50	50	20	0.2302	1	1	4	2	1	0.637895
P62878	RBX1	E3 ubiquitin-protein ligase RBX1 OS=Mus musculus GN=Rbx1 PE=1 SV=1	0	3	1	0	0	1	50	80	50	50	20	50	0.2302	1	4	1	2	1	0.637895
Q3UIX4	SRSF11	Protein Srsf11 OS=Mus musculus GN=Srsf11 PE=1 SV=1	0	2	3	0	2	0	50	50	80	50	50	20	0.2302	1	1	4	2	1	0.637895
Q7TMF2	ERI1	3~-5~ exoribonuclease 1 OS=Mus musculus GN=Eri1 PE=1 SV=2	2	3	0	2	0	0	50	80	50	50	20	50	0.2302	1	4	1	2	1	0.637895
Q9CQQ4	GEMIN2	Gem-associated protein 2 OS=Mus musculus GN=Gemin2 PE=2 SV=1	2	3	0	2	0	0	50	80	50	50	20	50	0.2302	1	4	1	2	1	0.637895
Q6PGA2	RRAD	GTP-binding protein RAD OS=Mus musculus GN=Rrad PE=1 SV=1	0	3	2	0	0	2	50	80	50	50	20	50	0.2302	1	4	1	2	1	0.637895
Q8BSP2	NCAPH2	Condensin-2 complex subunit H2 OS=Mus musculus GN=Ncaph2 PE=1 SV=1	0	3	2	0	0	2	50	80	50	50	20	50	0.2302	1	4	1	2	1	0.637895
G3XA30	NSMCE4A	MCG1618, isoform CRA_c OS=Mus musculus GN=Nsmce4a PE=1 SV=1	0	3	2	0	0	2	50	80	50	50	20	50	0.2302	1	4	1	2	1	0.637895
Q8K2F8	LSM14A	Protein LSM14 homolog A OS=Mus musculus GN=Lsm14a PE=1 SV=1	0	3	2	0	0	2	50	80	50	50	20	50	0.2302	1	4	1	2	1	0.637895
Q8BHN1	TXLNG	Gamma-taxilin OS=Mus musculus GN=Txlng PE=1 SV=1	0	3	3	0	0	3	50	80	50	50	20	50	0.2302	1	4	1	2	1	0.637895
Q61171	PRDX2	Peroxiredoxin-2 OS=Mus musculus GN=Prdx2 PE=1 SV=3	2	3	5	2	0	5	50	80	50	50	20	50	0.2302	1	4	1	2	1	0.637895
P62827	RAN	GTP-binding nuclear protein Ran OS=Mus musculus GN=Ran PE=1 SV=3	3	4	0	0	4	0	80	50	50	20	50	50	0.2302	4	1	1	2	1	0.637895
Q9CZU3	SKIV2L2	Superkiller viralicidic activity 2-like 2 OS=Mus musculus GN=Skiv2l2 PE=1 SV=1	5	15	11	3	10	3	60	59.2593	75	40	40.7407	25	0.0152391	1.5	1.45455	3	1.98485	0.989029	1.81704
P50580	PA2G4	Proliferation-associated protein 2G4 OS=Mus musculus GN=Pa2g4 PE=1 SV=3	28	32	28	10	20	16	72.5	61.1111	63.0435	27.5	38.8889	36.9565	0.00334073	2.63636	1.57143	1.70588	1.97122	0.979092	2.47616
Q9CU62	SMC1A	Structural maintenance of chromosomes protein 1A OS=Mus musculus GN=Smc1a PE=1 SV=4	18	18	11	12	6	6	59.375	73.0769	63.1579	40.625	26.9231	36.8421	0.00624299	1.46154	2.71429	1.71429	1.96337	0.973332	2.20461
Q8BH59	SLC25A12	Calcium-binding mitochondrial carrier protein Aralar1 OS=Mus musculus GN=Slc25a12 PE=1 SV=1	5	4	0	8	0	4	40	83.3333	16.6667	60	16.6667	83.3333	0.821147	0.666667	5	0.2	1.95556	0.967579	0.085579
B2RQE8	ARHGAP42	Rho GTPase-activating protein 42 OS=Mus musculus GN=Arhgap42 PE=1 SV=1	5	0	3	6	0	0	46.1538	50	80	53.8462	50	20	0.31335	0.857143	1	4	1.95238	0.965235	0.50397
Q6DVA0	LEMD2	LEM domain-containing protein 2 OS=Mus musculus GN=Lemd2 PE=1 SV=1	5	3	0	6	0	0	46.1538	80	50	53.8462	20	50	0.31335	0.857143	4	1	1.95238	0.965235	0.50397
B9EIZ7	CORO6	Coronin OS=Mus musculus GN=Coro6 PE=1 SV=1	5	3	0	6	0	0	46.1538	80	50	53.8462	20	50	0.31335	0.857143	4	1	1.95238	0.965235	0.50397
Q8QZX2	HAUS3	HAUS augmin-like complex subunit 3 OS=Mus musculus GN=Haus3 PE=1 SV=1	0	10	6	0	2	5	50	78.5714	53.8462	50	21.4286	46.1538	0.162993	1	3.66667	1.16667	1.94444	0.959358	0.78783
S4R2G5	GAPDHS	Glyceraldehyde-3-phosphate dehydrogenase OS=Mus musculus GN=Gapdhs PE=1 SV=1	3	1	3	0	3	2	80	33.3333	57.1429	20	66.6667	42.8571	0.513308	4	0.5	1.33333	1.94444	0.959358	0.289622
Q9DBN5	LONP2	Lon protease homolog 2, peroxisomal OS=Mus musculus GN=Lonp2 PE=1 SV=1	0	3	2	2	0	1	25	80	60	75	20	40	0.682706	0.333333	4	1.5	1.94444	0.959358	0.165766
Q3UGC7	EIF3J1	Eukaryotic translation initiation factor 3 subunit J-A OS=Mus musculus GN=Eif3j1 PE=2 SV=1	7	3	3	6	0	5	53.3333	80	40	46.6667	20	60	0.402532	1.14286	4	0.666667	1.93651	0.953457	0.3952
Q499E4	DZIP1L	Zinc finger protein DZIP1L OS=Mus musculus GN=Dzip1l PE=1 SV=1	2	3	6	0	1	8	75	66.6667	43.75	25	33.3333	56.25	0.148468	3	2	0.777778	1.92593	0.945552	0.828366
Q4FJX1	KPNA4	Importin subunit alpha OS=Mus musculus GN=Kpna4 PE=1 SV=1	3	5	3	0	4	6	80	54.5455	36.3636	20	45.4545	63.6364	0.479557	4	1.2	0.571429	1.92381	0.943966	0.31916
Q8VEB2	SAV1	Protein salvador homolog 1 OS=Mus musculus GN=Sav1 PE=1 SV=2	0	4	2	5	0	4	14.2857	83.3333	37.5	85.7143	16.6667	62.5	0.746909	0.166667	5	0.6	1.92222	0.942775	0.126732
Q99P88	NUP155	Nuclear pore complex protein Nup155 OS=Mus musculus GN=Nup155 PE=1 SV=1	2	13	16	0	9	12	75	58.3333	56.6667	25	41.6667	43.3333	0.032233	3	1.4	1.30769	1.90256	0.927945	1.4917
P14576	SRP54	Signal recognition particle 54 kDa protein OS=Mus musculus GN=Srp54 PE=1 SV=2	11	12	7	7	4	4	60	72.2222	61.5385	40	27.7778	38.4615	0.00581756	1.5	2.6	1.6	1.9	0.925999	2.23526
Q921M3	SF3B3	Splicing factor 3B subunit 3 OS=Mus musculus GN=Sf3b3 PE=1 SV=1	12	9	6	8	3	3	59.0909	71.4286	63.6364	40.9091	28.5714	36.3636	0.00445568	1.44444	2.5	1.75	1.89815	0.924593	2.35109
D3YZC9	SF1	Splicing factor 1 OS=Mus musculus GN=Sf1 PE=1 SV=1	2	4	1	0	2	1	75	62.5	50	25	37.5	50	0.070484	3	1.66667	1	1.88889	0.917538	1.15191
A0A087WNU6	LRRFIP1	Leucine-rich repeat flightless-interacting protein 1 (Fragment) OS=Mus musculus GN=Lrrfip1 PE=1 SV=1	4	0	2	2	0	0	62.5	50	75	37.5	50	25	0.070484	1.66667	1	3	1.88889	0.917538	1.15191
Q8K4Q8	COLEC12	Collectin-12 OS=Mus musculus GN=Colec12 PE=1 SV=1	4	2	0	2	0	0	62.5	75	50	37.5	25	50	0.070484	1.66667	3	1	1.88889	0.917538	1.15191
Q3TKV1	PSMD2	26S proteasome non-ATPase regulatory subunit 2 OS=Mus musculus GN=Psmd2 PE=1 SV=1	0	2	4	0	0	2	50	75	62.5	50	25	37.5	0.070484	1	3	1.66667	1.88889	0.917538	1.15191
Q99P69	NUF2	Kinetochore protein Nuf2 OS=Mus musculus GN=Nuf2 PE=1 SV=2	2	4	0	0	2	0	75	62.5	50	25	37.5	50	0.070484	3	1.66667	1	1.88889	0.917538	1.15191
A0A0J9YUR2	SPECC1	Cytospin-B OS=Mus musculus GN=Specc1 PE=1 SV=1	9	2	0	5	0	0	62.5	75	50	37.5	25	50	0.070484	1.66667	3	1	1.88889	0.917538	1.15191
Q9CWT6	DDX28	Probable ATP-dependent RNA helicase DDX28 OS=Mus musculus GN=Ddx28 PE=2 SV=2	0	6	6	0	1	5	50	77.7778	53.8462	50	22.2222	46.1538	0.161378	1	3.5	1.16667	1.88889	0.917538	0.792154
Q9Z2N8	ACTL6A	Actin-like protein 6A OS=Mus musculus GN=Actl6a PE=1 SV=2	1	3	0	2	0	0	40	80	50	60	20	50	0.476621	0.666667	4	1	1.88889	0.917538	0.321827
P62274	RPS29	40S ribosomal protein S29 OS=Mus musculus GN=Rps29 PE=3 SV=2	3	5	3	0	5	5	80	50	40	20	50	60	0.476621	4	1	0.666667	1.88889	0.917538	0.321827
A0A0J9YU32	RPL6	60S ribosomal protein L6 (Fragment) OS=Mus musculus GN=Rpl6 PE=1 SV=1	3	2	3	2	0	2	57.1429	75	57.1429	42.8571	25	42.8571	0.0358278	1.33333	3	1.33333	1.88889	0.917538	1.44578
G3UW82	MYH2	MCG140437, isoform CRA_d OS=Mus musculus GN=Myh2 PE=1 SV=1	2	1	1	0	2	0	75	40	66.6667	25	60	33.3333	0.2302	3	0.666667	2	1.88889	0.917538	0.637895
Q3V3P1	TOP3A	DNA topoisomerase OS=Mus musculus GN=Top3a PE=1 SV=1	1	2	1	2	0	0	40	75	66.6667	60	25	33.3333	0.2302	0.666667	3	2	1.88889	0.917538	0.637895
Q8BL48	UNK	RING finger protein unkempt homolog OS=Mus musculus GN=Unk PE=1 SV=1	3	4	4	0	5	5	80	45.4545	45.4545	20	54.5455	54.5455	0.44026	4	0.833333	0.833333	1.88889	0.917538	0.35629
Q00547	HMMR	Hyaluronan mediated motility receptor OS=Mus musculus GN=Hmmr PE=1 SV=4	24	24	24	12	10	16	65.7895	69.4444	59.5238	34.2105	30.5556	40.4762	0.00188812	1.92308	2.27273	1.47059	1.8888	0.917468	2.72397
E9PZW8	MYO9B	Unconventional myosin-IXb OS=Mus musculus GN=Myo9b PE=1 SV=1	6	3	0	10	0	0	38.8889	80	50	61.1111	20	50	0.508475	0.636364	4	1	1.87879	0.909802	0.29373
F8WGR0	ADD1	Alpha-adducin OS=Mus musculus GN=Add1 PE=1 SV=1	8	8	5	7	2	3	52.9412	75	60	47.0588	25	40	0.0513757	1.125	3	1.5	1.875	0.906891	1.28924
Q91YQ5	RPN1	Dolichyl-diphosphooligosaccharide--protein glycosyltransferase subunit 1 OS=Mus musculus GN=Rpn1 PE=1 SV=1	9	22	10	10	7	5	47.619	74.1935	64.7059	52.381	25.8065	35.2941	0.0912114	0.909091	2.875	1.83333	1.87247	0.904946	1.03995
Q01320	TOP2A	DNA topoisomerase 2-alpha OS=Mus musculus GN=Top2a PE=1 SV=2	7	2	0	4	0	0	61.5385	75	50	38.4615	25	50	0.0756321	1.6	3	1	1.86667	0.900464	1.12129
Q08288	LYAR	Cell growth-regulating nucleolar protein OS=Mus musculus GN=Lyar PE=1 SV=2	4	0	3	3	2	0	55.5556	25	80	44.4444	75	20	0.770091	1.25	0.333333	4	1.86111	0.896164	0.113458
E9Q238	KANK1	Protein Kank1 OS=Mus musculus GN=Kank1 PE=1 SV=1	13	2	3	8	0	3	60.8696	75	50	39.1304	25	50	0.0796939	1.55556	3	1	1.85185	0.888969	1.09858
Q61510 & Q5SU71	TRIM25	E3 ubiquitin/ISG15 ligase TRIM25 OS=Mus musculus GN=Trim25 PE=1 SV=2	8	11	8	11	3	4	42.8571	75	64.2857	57.1429	25	35.7143	0.184074	0.75	3	1.8	1.85	0.887525	0.735007
Q91WR3	ASCC2	Activating signal cointegrator 1 complex subunit 2 OS=Mus musculus GN=Ascc2 PE=1 SV=1	13	8	8	9	2	7	58.3333	75	52.9412	41.6667	25	47.0588	0.0616151	1.4	3	1.125	1.84167	0.881012	1.21031
Q8C5Q4	GRSF1	G-rich sequence factor 1 OS=Mus musculus GN=Grsf1 PE=1 SV=2	2	5	4	0	3	4	75	60	50	25	40	50	0.0856236	3	1.5	1	1.83333	0.874469	1.06741
Q08509	EPS8	Epidermal growth factor receptor kinase substrate 8 OS=Mus musculus GN=Eps8 PE=1 SV=2	17	8	14	5	8	9	75	50	60	25	50	40	0.0856236	3	1	1.5	1.83333	0.874469	1.06741
Q9CX53	GEMIN6	Gem-associated protein 6 OS=Mus musculus GN=Gemin6 PE=1 SV=2	2	0	2	0	0	1	75	50	60	25	50	40	0.0856236	3	1	1.5	1.83333	0.874469	1.06741
Q9DBR0	AKAP8	A-kinase anchor protein 8 OS=Mus musculus GN=Akap8 PE=1 SV=1	1	2	0	0	0	1	66.6667	75	33.3333	33.3333	25	66.6667	0.40694	2	3	0.5	1.83333	0.874469	0.390469
S4R1Y1	CUL9	Cullin-9 OS=Mus musculus GN=Cul9 PE=1 SV=1	1	2	0	0	0	1	66.6667	75	33.3333	33.3333	25	66.6667	0.40694	2	3	0.5	1.83333	0.874469	0.390469
Q4VGL6	RC3H1	Roquin-1 OS=Mus musculus GN=Rc3h1 PE=1 SV=1	0	2	1	1	0	0	33.3333	75	66.6667	66.6667	25	33.3333	0.40694	0.5	3	2	1.83333	0.874469	0.390469
F6W3U3	2310061I04RIK	Protein 2310061I04Rik (Fragment) OS=Mus musculus GN=2310061I04Rik PE=1 SV=1	0	2	1	1	0	0	33.3333	75	66.6667	66.6667	25	33.3333	0.40694	0.5	3	2	1.83333	0.874469	0.390469
Q3UVJ7	DECR2	2-4-dienoyl-Coenzyme A reductase 2, peroxisomal OS=Mus musculus GN=Decr2 PE=1 SV=1	3	2	2	0	3	3	80	42.8571	42.8571	20	57.1429	57.1429	0.581857	4	0.75	0.75	1.83333	0.874469	0.235184
E9PYQ1	TGFB1I1	Transforming growth factor beta-1-induced transcript 1 protein OS=Mus musculus GN=Tgfb1i1 PE=1 SV=1	1	0	3	1	1	0	50	33.3333	80	50	66.6667	20	0.66918	1	0.5	4	1.83333	0.874469	0.174457
F6VQH5	HNRNPDL	Heterogeneous nuclear ribonucleoprotein D-like (Fragment) OS=Mus musculus GN=Hnrnpdl PE=1 SV=1	5	3	0	5	0	1	50	80	33.3333	50	20	66.6667	0.66918	1	4	0.5	1.83333	0.874469	0.174457
Q9CQ65	MTAP	S-methyl-5~-thioadenosine phosphorylase OS=Mus musculus GN=Mtap PE=1 SV=1	1	3	3	3	3	0	33.3333	50	80	66.6667	50	20	0.66918	0.5	1	4	1.83333	0.874469	0.174457
Q3ULL6	UPF3B	Protein Upf3b OS=Mus musculus GN=Upf3b PE=1 SV=1	2	3	3	5	0	3	33.3333	80	50	66.6667	20	50	0.66918	0.5	4	1	1.83333	0.874469	0.174457
Q9QZE5	COPG1	Coatomer subunit gamma-1 OS=Mus musculus GN=Copg1 PE=1 SV=1	2	13	11	0	10	9	75	56	54.5455	25	44	45.4545	0.0637766	3	1.27273	1.2	1.82424	0.867297	1.19534
E9Q580 & P46735 & Q7TQD7	MYO1B	Unconventional myosin-Ib OS=Mus musculus GN=Myo1b PE=1 SV=1	86	26	72	26	45	43	76.3158	36.9863	62.3932	23.6842	63.0137	37.6068	0.352135	3.22222	0.586957	1.65909	1.82276	0.866122	0.453291
Q9D7I8	FAM83D	Protein FAM83D OS=Mus musculus GN=Fam83d PE=2 SV=1	13	12	10	6	7	5	66.6667	61.9048	64.7059	33.3333	38.0952	35.2941	0.00012249	2	1.625	1.83333	1.81944	0.863498	3.9119
A2RSB1	NAP1L4	Nucleosome assembly protein 1-like 4 OS=Mus musculus GN=Nap1l4 PE=1 SV=1	6	13	14	1	13	15	77.7778	50	48.3871	22.2222	50	51.6129	0.265644	3.5	1	0.9375	1.8125	0.857981	0.575699
E9Q723	TTC13	Protein Ttc13 OS=Mus musculus GN=Ttc13 PE=1 SV=1	6	7	0	3	2	0	63.6364	72.7273	50	36.3636	27.2727	50	0.0603306	1.75	2.66667	1	1.80556	0.852443	1.21946
P97461 & D3YYM6	RPS5	40S ribosomal protein S5 OS=Mus musculus GN=Rps5 PE=1 SV=3	23	27	21	9	13	21	70.5882	66.6667	50	29.4118	33.3333	50	0.0496884	2.4	2	1	1.8	0.847997	1.30374
Q8VI75	IPO4	Importin-4 OS=Mus musculus GN=Ipo4 PE=1 SV=1	0	2	6	0	0	4	50	75	58.3333	50	25	41.6667	0.0993007	1	3	1.4	1.8	0.847997	1.00305
A0A0A6YXG1	MAST4	Microtubule-associated serine/threonine-protein kinase 4 (Fragment) OS=Mus musculus GN=Mast4 PE=1 SV=1	3	0	1	0	0	4	80	50	28.5714	20	50	71.4286	0.799862	4	1	0.4	1.8	0.847997	0.0969847
O70318	EPB41L2	Band 4.1-like protein 2 OS=Mus musculus GN=Epb41l2 PE=1 SV=2	1	6	12	0	3	7	66.6667	63.6364	61.9048	33.3333	36.3636	38.0952	0.000138998	2	1.75	1.625	1.79167	0.841302	3.85699
Q9CPN8	IGF2BP3	Insulin-like growth factor 2 mRNA-binding protein 3 OS=Mus musculus GN=Igf2bp3 PE=1 SV=1	19	15	12	9	6	11	66.6667	69.5652	52	33.3333	30.4348	48	0.0295169	2	2.28571	1.08333	1.78968	0.839704	1.52993
Q99K48	NONO	Non-POU domain-containing octamer-binding protein OS=Mus musculus GN=Nono PE=1 SV=3	23	16	19	27	5	11	46.1538	73.913	62.5	53.8462	26.087	37.5	0.129369	0.857143	2.83333	1.66667	1.78571	0.836501	0.88817
E9QP99	GOLGA3	Golgin subfamily A member 3 OS=Mus musculus GN=Golga3 PE=1 SV=1	6	3	0	19	0	0	25.9259	80	50	74.0741	20	50	0.866932	0.35	4	1	1.78333	0.834576	0.062015
Q8K1R3	PNPT1	Polyribonucleotide nucleotidyltransferase 1, mitochondrial OS=Mus musculus GN=Pnpt1 PE=1 SV=1	0	6	5	0	2	2	50	70	66.6667	50	30	33.3333	0.049111	1	2.33333	2	1.77778	0.830075	1.30882
A0A0A6YVS2	TMCO1	Transmembrane and coiled-coil domain-containing protein 1 (Fragment) OS=Mus musculus GN=Tmco1 PE=1 SV=1	0	3	2	2	1	0	25	66.6667	75	75	33.3333	25	0.638186	0.333333	2	3	1.77778	0.830075	0.195053
Q3TXR9	HEXB	Beta-hexosaminidase OS=Mus musculus GN=Hexb PE=1 SV=1	2	0	1	0	2	0	75	25	66.6667	25	75	33.3333	0.638186	3	0.333333	2	1.77778	0.830075	0.195053
D3Z4D8	FAM175B	BRISC complex subunit Abro1 (Fragment) OS=Mus musculus GN=Fam175b PE=1 SV=2	0	1	2	2	0	0	25	66.6667	75	75	33.3333	25	0.638186	0.333333	2	3	1.77778	0.830075	0.195053
Q99J95	CDK9	Cyclin-dependent kinase 9 OS=Mus musculus GN=Cdk9 PE=1 SV=1	0	1	2	2	0	0	25	66.6667	75	75	33.3333	25	0.638186	0.333333	2	3	1.77778	0.830075	0.195053
Q6A0D1	EMC2	ER membrane protein complex subunit 2 (Fragment) OS=Mus musculus GN=Emc2 PE=1 SV=1	0	2	1	2	0	0	25	75	66.6667	75	25	33.3333	0.638186	0.333333	3	2	1.77778	0.830075	0.195053
Q9DCE5	PAK1IP1	p21-activated protein kinase-interacting protein 1 OS=Mus musculus GN=Pak1ip1 PE=1 SV=2	2	4	3	1	1	2	60	71.4286	57.1429	40	28.5714	42.8571	0.0140745	1.5	2.5	1.33333	1.77778	0.830075	1.85157
Q6PHQ8	NAA35	N-alpha-acetyltransferase 35, NatC auxiliary subunit OS=Mus musculus GN=Naa35 PE=1 SV=1	0	7	4	0	2	2	50	72.7273	62.5	50	27.2727	37.5	0.0648761	1	2.66667	1.66667	1.77778	0.830075	1.18791
[truncated: 1,129 more rows]
